# Supplementary material for: Organocatalytic cascade reactions for multi-functionalized chiral cyclic ethers through vinylidene ortho-quinone methides
Source: Royal Society of Chemistry journal article supplement (doi:10.1039/d1cc05340j), 2021-01-01
Supplement: d1cc05340j1.pdf [file d1cc05340j1.pdf]

## *Supporting Information for*

### **Organocatalytic Cascade Reactions to Multi-functionalized Chiral Cyclic Ethers through Vinylidene *ortho*-Quinone Methides**

Shiqi Jia,<sup>a</sup> Yu Chang,<sup>a</sup> Yuhong Tian,<sup>a</sup> Hui Mao,<sup>b</sup> Wenling Qin,<sup>a</sup> Pengfei Wang,<sup>\*a</sup> Hailong Yan<sup>\*a</sup>

<sup>\*</sup>Corresponding author. Dr. Pengfei Wang, E-mail: wangpf@cqu.edu.cn;

Prof. Hailong Yan, E-mail: yhl198151@cqu.edu.cn

|       |                                                                                                                               |     |
|-------|-------------------------------------------------------------------------------------------------------------------------------|-----|
| I.    | General information.....                                                                                                      | 2   |
| II.   | General procedure for the synthesis of substrate. ....                                                                        | 3   |
| III.  | Optimization of the reaction conditions .....                                                                                 | 6   |
| IV.   | General procedure for the asymmetric reaction.....                                                                            | 8   |
| V.    | Mechanistic studies.....                                                                                                      | 8   |
| VI.   | Synthetic transformation and continuous flow experiment: .....                                                                | 14  |
| VII.  | <sup>1</sup> H, <sup>13</sup> C NMR and HRMS data of substrates ( <b>1a-1k</b> , <b>3a-3h</b> ).....                          | 16  |
| VIII. | <sup>1</sup> H, <sup>13</sup> C NMR, HRMS and HPLC traces of products ( <b>2a-2w</b> , <b>4a-4j</b> , <b>5j-6j</b> ) .....    | 26  |
| IX.   | <sup>1</sup> H and <sup>13</sup> C NMR spectra of substrates ( <b>1a-1k</b> , <b>3a-3h</b> ).....                             | 61  |
| X.    | <sup>1</sup> H and <sup>13</sup> C NMR spectra of substrates ( <b>2a-2w</b> , <b>4a-4j</b> , <b>5j-6j</b> , <b>M1</b> ) ..... | 80  |
| XI.   | Crystallographic details of <b>4j</b> .....                                                                                   | 116 |

## I. General information

$^1\text{H}$  and  $^{13}\text{C}$  NMR spectra were recorded on Agilent 400MR DD2 (400 MHz) spectrometer. Chemical shifts were reported in parts per million (ppm), and tetramethylsilane or the residual solvent peak was used as an internal reference:  $^1\text{H}$  (tetramethylsilane  $\delta$  0.00 ppm, toluene  $\delta$  2.08 ppm),  $^{13}\text{C}$  (chloroform  $\delta$  77.00 ppm, acetone  $\delta$  29.70 ppm, toluene  $\delta$  137.48 ppm). Data are reported as follows: chemical shift, multiplicity (s = singlet, d = doublet, t = triplet, q = quartet, m = multiplet, br = broad), coupling constants (Hz) and integration. Enantiomeric excesses (*ee*) were determined by HPLC analysis on Hitachi Chromaster using DAICEL CHIRALCEL AD-H, 4.6 mm  $\Phi$   $\times$  250 mmL, DAICEL CHIRALCEL OD-H, 4.6 mm  $\Phi$   $\times$  250 mmL, DAICEL CHIRALCEL IA-H, 4.6 mm  $\Phi$   $\times$  250 mmL, DAICEL CHIRALCEL IB-H, 4.6 mm  $\Phi$   $\times$  250 mmL and DAICEL CHIRALCEL IC-H, 4.6 mm  $\Phi$   $\times$  250 mmL. High resolution mass spectra (HRMS) were performed on Bruker Solarix 7.0 T. X-ray crystallography analysis of single crystal was performed on an Agilent SuperNova-CCD X-Ray diffractometer. Optical rotations were measured on a Rudolph Autopol I polarimeter and are reported as follows:  $[\alpha]_D^{20}$  (*c* in g per 100 mL solvent). Unless otherwise stated, all reagents were purchased from commercial suppliers and used without further purification.

## II. General procedure for the synthesis of substrate.

### Method A:

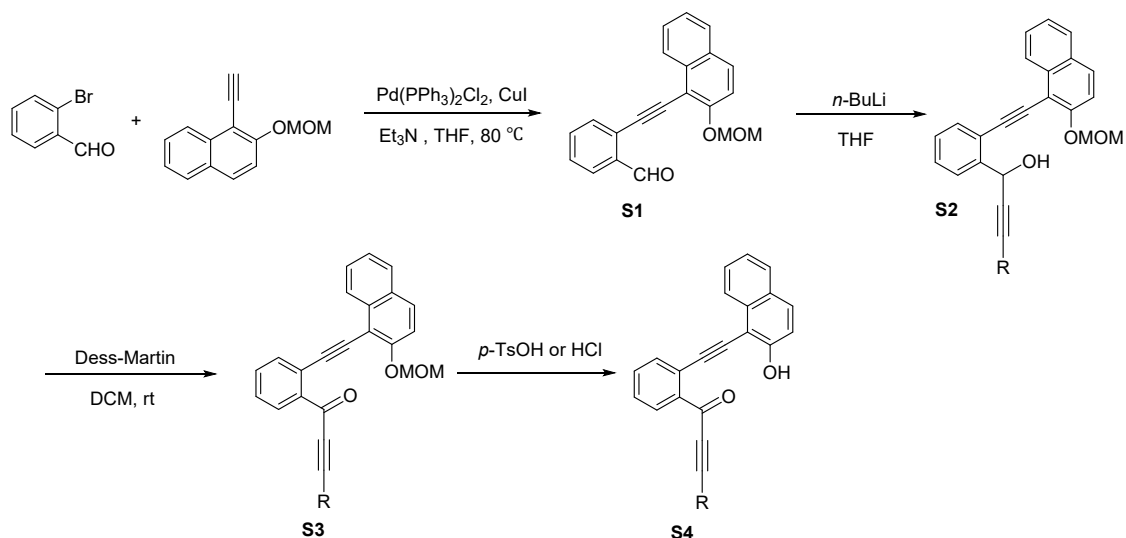

**Step1:** 1-ethynyl-2-(methoxymethoxy)naphthalene (1.0 eq. 10 mmol) was dropwisely added to a solution of the 2-bromobenzaldehyde (1.0 eq. 10 mmol),  $\text{PdCl}_2(\text{PPh}_3)_2$  (0.02 eq. 0.2mmol),  $\text{CuI}$  (0.04 eq. 0.4 mmol), and  $\text{Et}_3\text{N}$  (20 mL) in THF (20 mL) at  $80^\circ\text{C}$  under  $\text{N}_2$ . The mixture was stirred for 2 h. Then the mixture was filtered through a pad of celite. Removal of the solvent under reduced pressure. The crude product was purified by column chromatography on silica gel (PE: EA = 10:1) to afford S1.

**Step2:** An oven-dried 100 mL three-neck round-bottom flask equipped with a 100 mL pressure-equalizing addition funnel,  $\text{N}_2$  gas inlet adaptor, septum, and magnetic stir bar was charged with THF (20 mL) and corresponding alkynes (1.1 eq. 11 mmol). The solution was cooled to  $-78^\circ\text{C}$  under  $\text{N}_2$  and 2.5 M  $n\text{-BuLi}$  in hexane (1.1 eq. 11 mmol) was added dropwise over 30 min. After 2 h stirring at  $-78^\circ\text{C}$ , a solution of benzaldehyde (1.0 eq. 10 mmol) in 20 mL THF was added dropwise over 35 min to the cloudy white reaction mixture at  $-78^\circ\text{C}$ . After stirring for 2 h at  $-78^\circ\text{C}$ , the homogeneous reaction

mixture was quenched by dropwise addition of saturated  $\text{NH}_4\text{Cl}$  in methanol (20 mL) to the reaction mixture at  $-78\text{ }^\circ\text{C}$  over 15 min. After stirring an additional 5 min at  $-78\text{ }^\circ\text{C}$ , the cooling bath was removed, and the reaction mixture was allowed to warm to room temperature (ca. 1 h). Once at room temperature, diethyl ether (20 mL) and water (20 mL) were added to the reaction mixture. The mixture was shaken, and the layers were separated. The aqueous layer was extracted with diethyl ether ( $2 \times 10\text{ mL}$ ), and the combined organic layers were washed with saturated  $\text{NaCl}$  (aq) ( $2 \times 10\text{ mL}$ ) and water ( $2 \times 25\text{ mL}$ ), dried over anhydrous  $\text{MgSO}_4$ , and filtered. The solvent was removed in vacuo to afford a pale yellow liquid. The crude product was purified by column chromatography on silica gel ( $\text{SiO}_2$ , PE: EA = 10:1) to afford **S2**

**Step3:** Dissolve the propargylic alcohol (10 mmol) in DCM (50 mL) and cool to  $0\text{ }^\circ\text{C}$ . Add Dess-Martin periodinane (1.1 eq. 11 mmol) and allow the mixture to warm to room temperature. Monitor the reaction mixture by TLC and add aq.  $\text{NaOH}$  (1.1 equiv, 1M solution). Separate the layers and extract the aqueous layer with DCM (3 x). Combine the organic layers and dry over  $\text{Na}_2\text{SO}_4$ . Evaporate the solvent. Purify the crude product by flash column chromatography ( $\text{SiO}_2$ , PE: EA = 10:1) to obtain the product **S3**.

**Step4:** Dissolve **S3** (1.0 eq. 10 mmol) in tetrahydrofuran (50 mL), then add *p*-toluenesulfonic acid (2.0 eq. 20 mmol) or Concentrated hydrochloric acid ( $\text{HCl}$ ). Stir the reaction mixture at room temperature for 2 hours. Quench the reaction mixture with brine (10 mL), extract with diethyl ether (3 x 10 mL). Combine the organic portions and dry over anhydrous  $\text{MgSO}_4$ . Remove the solvents in vacuo and purify the residue by flash chromatography on silica gel ( $\text{SiO}_2$ , PE: EA = 10:1) to obtain **S4** as yellow

amorphous solid.

### Method B:

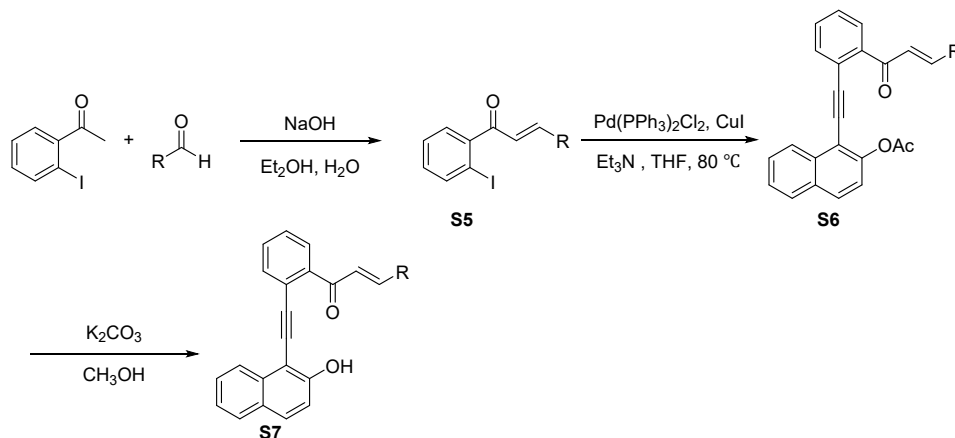

**Step1:** Cool a solution of NaOH (731 mg, 18.3 mmol) in H<sub>2</sub>O (20.0 mL) and Et<sub>2</sub>OH (20.0 mL) to 0 °C. Introduce 1-(2-iodophenyl)ethan-1-one (3.00 g) and benzaldehyde (1.20 mL, 12.2 mmol) slowly to the mixture. Allow the reaction mixture to warm to room temperature overnight. After 12 hours, dilute the reaction mixture with Et<sub>2</sub>O. Separate the organic phase. Concentrate the organic layer in vacuo. Purify the residue by column chromatography (SiO<sub>2</sub>, PE: DCM = 10:1) to obtain the product **S5** as yellow oil.

**Step2:** Ester-protected alkyne (1.0 eq. 10 mmol) was dropwised to a solution of the 2-bromobenzaldehyde (1.0 eq. 10 mmol), Pd(PPh<sub>3</sub>)<sub>2</sub>Cl<sub>2</sub> (0.02 eq. 0.2mmol), CuI (0.04 eq. 0.4 mmol), and Et<sub>3</sub>N (20 mL) in THF (20 mL) at 80 °C under N<sub>2</sub>. The mixture was stirred for 1 h. Then the mixture was filtered through a pad of celite. Removal of solvent under reduced pressure. The crude product was purified by column chromatography on silica gel (PE: EA = 10:1) to afford **S6** as yellow solid.

**Step3:** To a solution of the acetate (1.0 eq. 10 mmol) in MeOH at 0 °C was added anhydrous K<sub>2</sub>CO<sub>3</sub> (1.1 eq. 11 mmol). After the solution was stirred for 0.5 h, the reaction was quenched with 1 M HCl and extracted with CH<sub>2</sub>Cl<sub>2</sub>. The organic layer was washed with brine and dried over Na<sub>2</sub>SO<sub>4</sub>, followed by filtration and concentration. The residue was chromatographed (SiO<sub>2</sub>, PE: EA = 10:1) to yield **S7** as yellow solid.

### III. Optimization of the reaction conditions

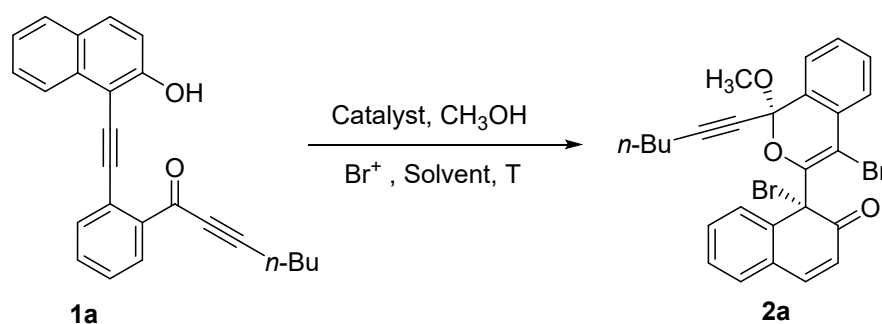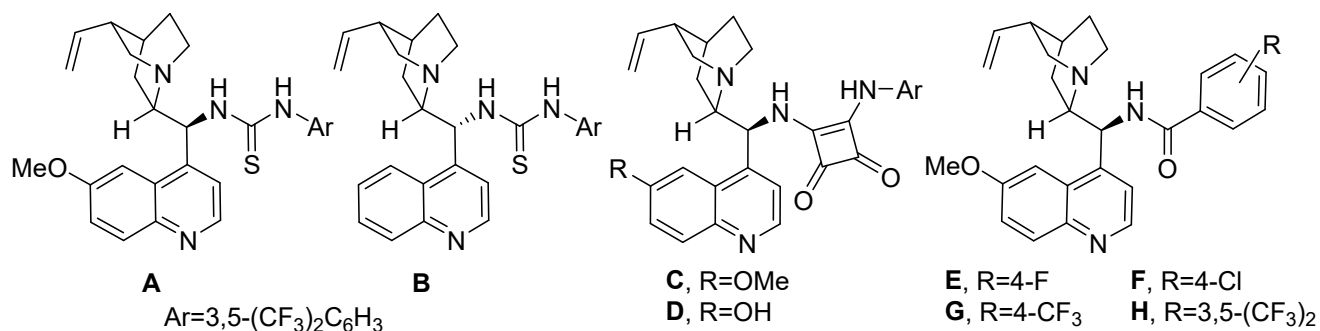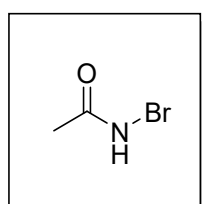

NBA

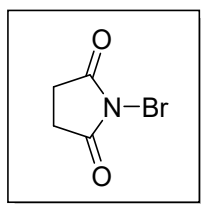

NBS

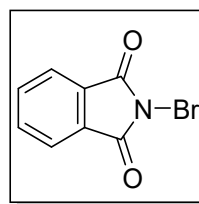

NBP

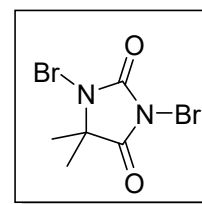

DBDMH

| Entry             | Catalyst | Solvent           | <i>T</i> (°C) | Br <sup>+</sup> | Yield (%) <sup>[a]</sup> | <i>ee</i> (%) <sup>[b]</sup> | d.r. <sup>[c]</sup> |
|-------------------|----------|-------------------|---------------|-----------------|--------------------------|------------------------------|---------------------|
| 1                 | <b>A</b> | toluene           | rt.           | NBA             | 80                       | 37                           | >20:1               |
| 2                 | <b>B</b> | toluene           | rt.           | NBA             | 82                       | -25                          | >20:1               |
| 3                 | <b>C</b> | toluene           | rt.           | NBA             | 72                       | 59                           | >20:1               |
| 4                 | <b>D</b> | toluene           | rt.           | NBA             | 65                       | 7                            | >20:1               |
| 5                 | <b>E</b> | toluene           | rt.           | NBA             | 78                       | 74                           | >20:1               |
| 6                 | <b>F</b> | toluene           | rt.           | NBA             | 79                       | 77                           | >20:1               |
| 7                 | <b>G</b> | toluene           | rt.           | NBA             | 78                       | 74                           | >20:1               |
| 8                 | <b>H</b> | toluene           | rt.           | NBA             | 88                       | 91                           | >20:1               |
| 9                 | <b>H</b> | <i>o</i> -xylene  | rt.           | NBA             | 86                       | 90                           | >20:1               |
| 10                | <b>H</b> | <i>p</i> -xylene  | rt.           | NBA             | 89                       | 84                           | >20:1               |
| 11                | <b>H</b> | <i>m</i> -xylene  | rt.           | NBA             | 87                       | 90                           | >20:1               |
| 12                | <b>H</b> | mesitylene        | rt.           | NBA             | 84                       | 90                           | >20:1               |
| 13                | <b>H</b> | DCE               | rt.           | NBA             | 70                       | 70                           | >20:1               |
| 14                | <b>H</b> | DCM               | rt.           | NBA             | 68                       | 74                           | >20:1               |
| 15                | <b>H</b> | CHCl <sub>3</sub> | rt.           | NBA             | 72                       | 79                           | >20:1               |
| 16                | <b>H</b> | toluene           | 0             | NBA             | 85                       | 91                           | >20:1               |
| 17                | <b>H</b> | toluene           | -20           | NBA             | 76                       | 89                           | >20:1               |
| 18                | <b>H</b> | toluene           | -40           | NBA             | 30                       | 78                           | >20:1               |
| 19                | <b>H</b> | toluene           | rt.           | NBS             | 80                       | 5                            | >20:1               |
| 20                | <b>H</b> | toluene           | rt.           | NBP             | 82                       | 33                           | >20:1               |
| 21                | <b>H</b> | toluene           | rt.           | DBDMH           | 89                       | 65                           | >20:1               |
| 22 <sup>[d]</sup> | <b>H</b> | toluene           | rt.           | NBA             | 81                       | 83                           | >20:1               |
| 23 <sup>[e]</sup> | <b>H</b> | toluene           | rt.           | NBA             | 89                       | 90                           | >20:1               |

Reaction conditions: **1a** (0.05 mmol, 1.0 eq.), catalyst (10 mol%) and methanol (3.0 eq.) in solvent (1.0 mL) at corresponding temperature for 5 min, then brominating reagents (1.1 mmol, 2.2 eq.) were added at corresponding temperature. After the reaction was completed, monitored by TLC (about 3 min at rt, 30 min at 0 °C, 4 h at -20 °C, and 12 h at -40 °C). [a] Isolated yield. [b] Enantiomeric excess was (*ee*) determined by HPLC. [c] Diastereomeric ratio (d.r.) was determined by HPLC. [d] Reaction in toluene (0.5 mL). [e] Reaction in toluene (2.0 mL).

#### IV. General procedure for the asymmetric reaction

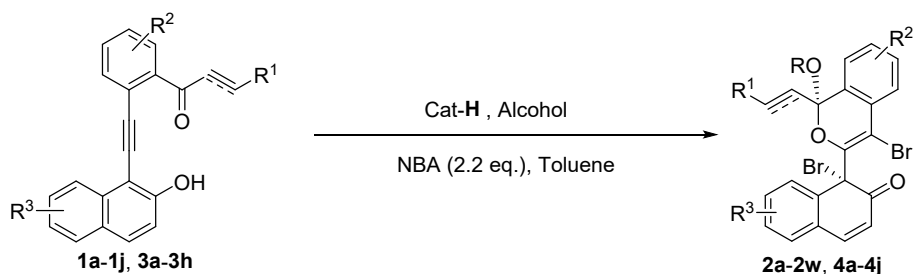

The substrate **1** (0.1 mmol), catalyst (10 mol%) were added to a 10 mL flame-dried schlenk tube (wrapped with aluminum foil) with a magnetic stirring bar. Toluene (2 mL) and alcohols (3 eq.) were injected into the tube. NBA was poured into reaction system, after stirring for 5 min, the mixture was evaporated and purified by flash column chromatography (SiO<sub>2</sub>, PE: EA = 10:1) to afford the product. Racemic samples were prepared with Et<sub>3</sub>N (1.0 eq.) as the additive base.

#### V. Mechanistic studies

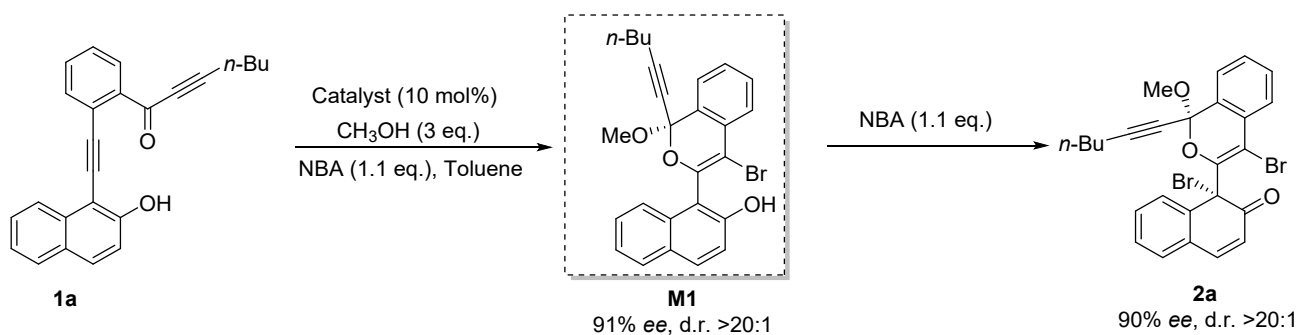

The substrate **1** (0.1 mmol), catalyst (10 mol%) were added to a 10 mL flame-dried schlenk tube with a magnetic stirring bar. Toluene-*d*<sub>8</sub> (2 mL) and methanol (3 eq.) was injected into the tube at -10 °C. NBA (2.2 eq.) was poured into reaction system, The intermediate **M1** were monitored by TLC, and detected by HRMS.



### Acquisition Parameter

|                          |            |                   |     |                       |                          |
|--------------------------|------------|-------------------|-----|-----------------------|--------------------------|
| Polarity                 | Negative   | n/a               | n/a | No. of Laser Shots    | 200                      |
| n/a                      | n/a        | No. of Cell Fills | 1   | Laser Power           | 20.0 lp                  |
| Broadband Low Mass       | 200.7 m/z  | n/a               | n/a | n/a                   | n/a                      |
| Broadband High Mass      | 1000.0 m/z | n/a               | n/a | n/a                   | n/a                      |
| Acquisition Mode         | Single MS  | n/a               | n/a |                       |                          |
| Pulse Program            | basic      | n/a               | n/a | Calibration Date      | Tue Apr 13 03:01:48 2021 |
| Source Accumulation      | 0.500 sec  | n/a               | n/a | Data Acquisition Size | 1048576                  |
| Ion Accumulation Time    | 0.100 sec  | n/a               | n/a | Apodization           | Sine-Bell Multiplication |
| Flight Time to Acq. Cell | 0.001 sec  |                   |     |                       |                          |

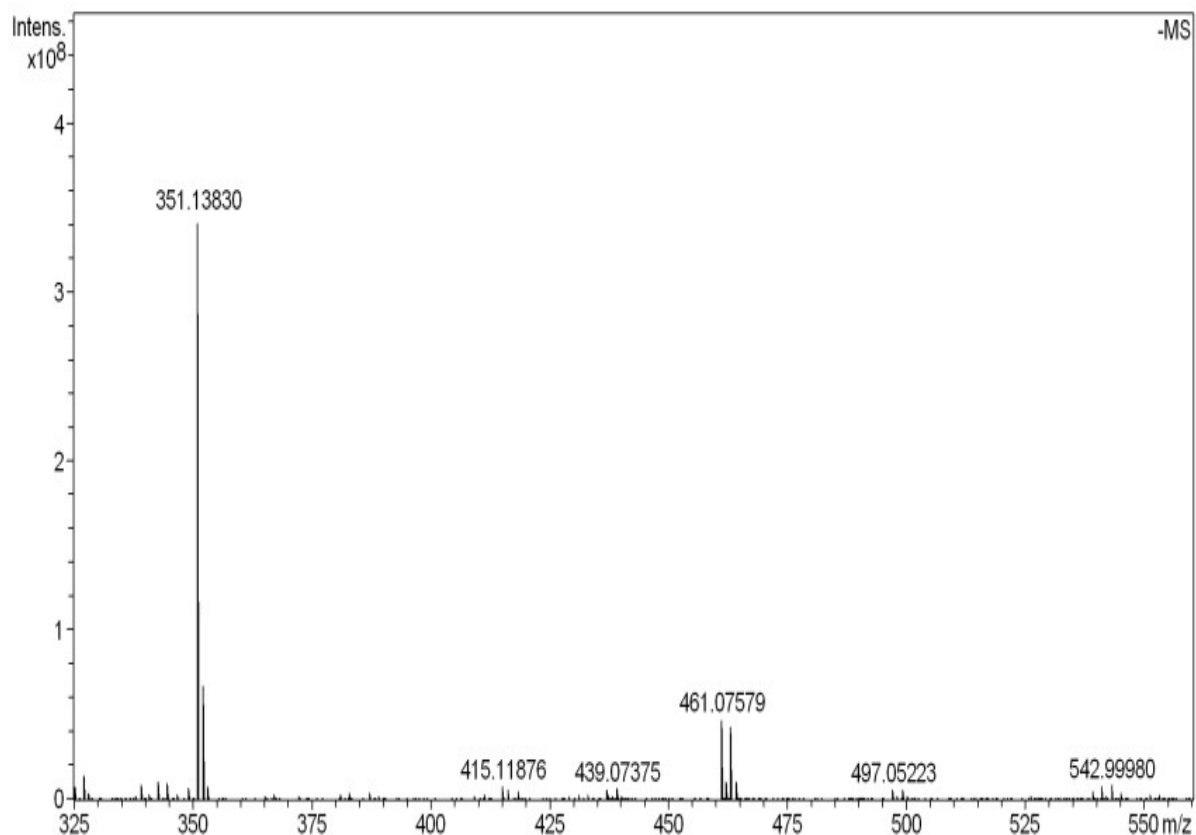

| Meas. m/z | # | Formula                                                        | Score  | m/z       | err [ppm] | Mean err [ppm] | mSigma | rdb  | e <sup>-</sup> Conf | N-R |
|-----------|---|----------------------------------------------------------------|--------|-----------|-----------|----------------|--------|------|---------------------|-----|
| 351.13830 | 1 | C <sub>25</sub> H <sub>19</sub> O <sub>2</sub>                 | 100.00 | 351.13905 | 2.14      | 1.97           | 48.4   | 16.5 | even                | ok  |
| 461.07579 | 1 | C <sub>26</sub> H <sub>22</sub> BrO <sub>3</sub>               | 100.00 | 461.07578 | -0.02     | 0.06           | 179.2  | 15.5 | even                | ok  |
| 538.98633 | 1 | C <sub>26</sub> H <sub>21</sub> Br <sub>2</sub> O <sub>3</sub> | 100.00 | 538.98629 | -0.06     | 0.34           | 145.7  | 15.5 | even                | ok  |

Figure 1: HRMS of reaction system

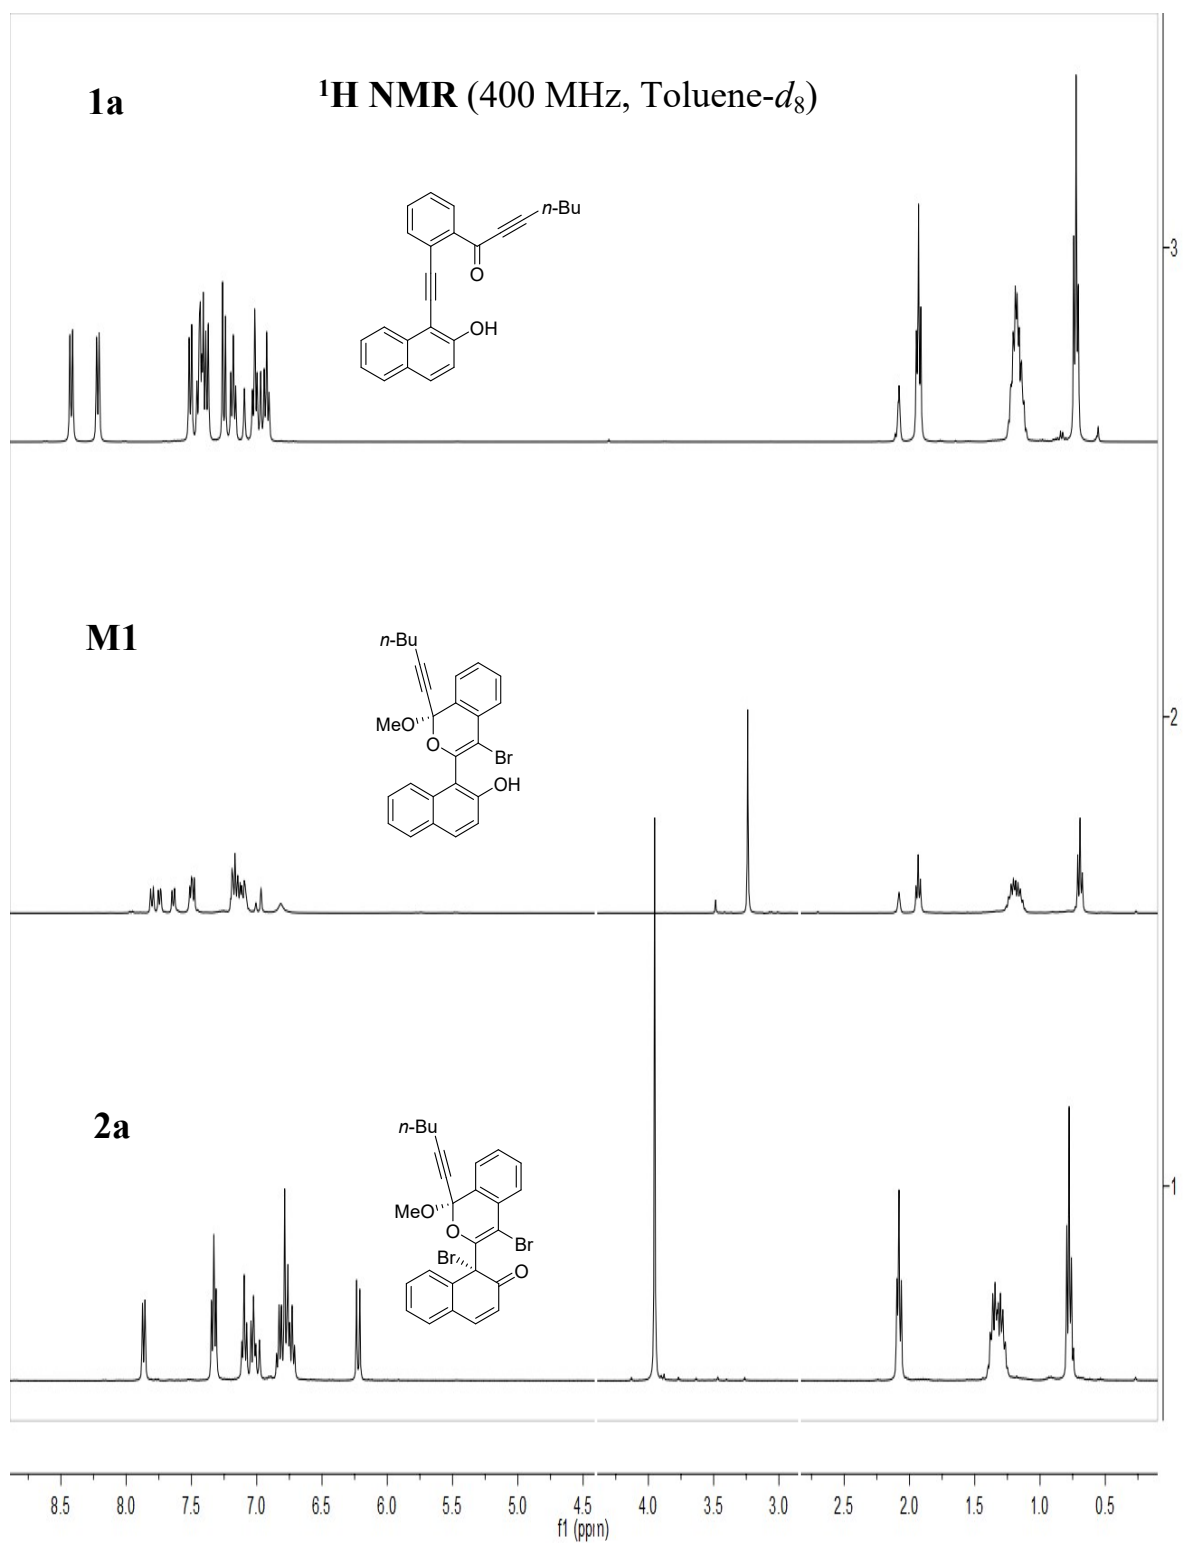

Figure 2: <sup>1</sup>H NMR of standard substance **1a**, **M1**, **2a**

| Time (min) | Ratio ( <b>1a</b> )% | Ratio ( <b>M1</b> )% | Ratio ( <b>2a</b> )% |
|------------|----------------------|----------------------|----------------------|
| 0          | 100                  | 0                    | 0                    |
| 5          | 26                   | 62                   | 12                   |
| 15         | 19                   | 65                   | 16                   |
| 20         | 10                   | 57                   | 33                   |
| 40         | 0.1                  | 53                   | 37                   |
| 60         | 0                    | 11                   | 88                   |
| 70         | 0                    | 0                    | 100                  |

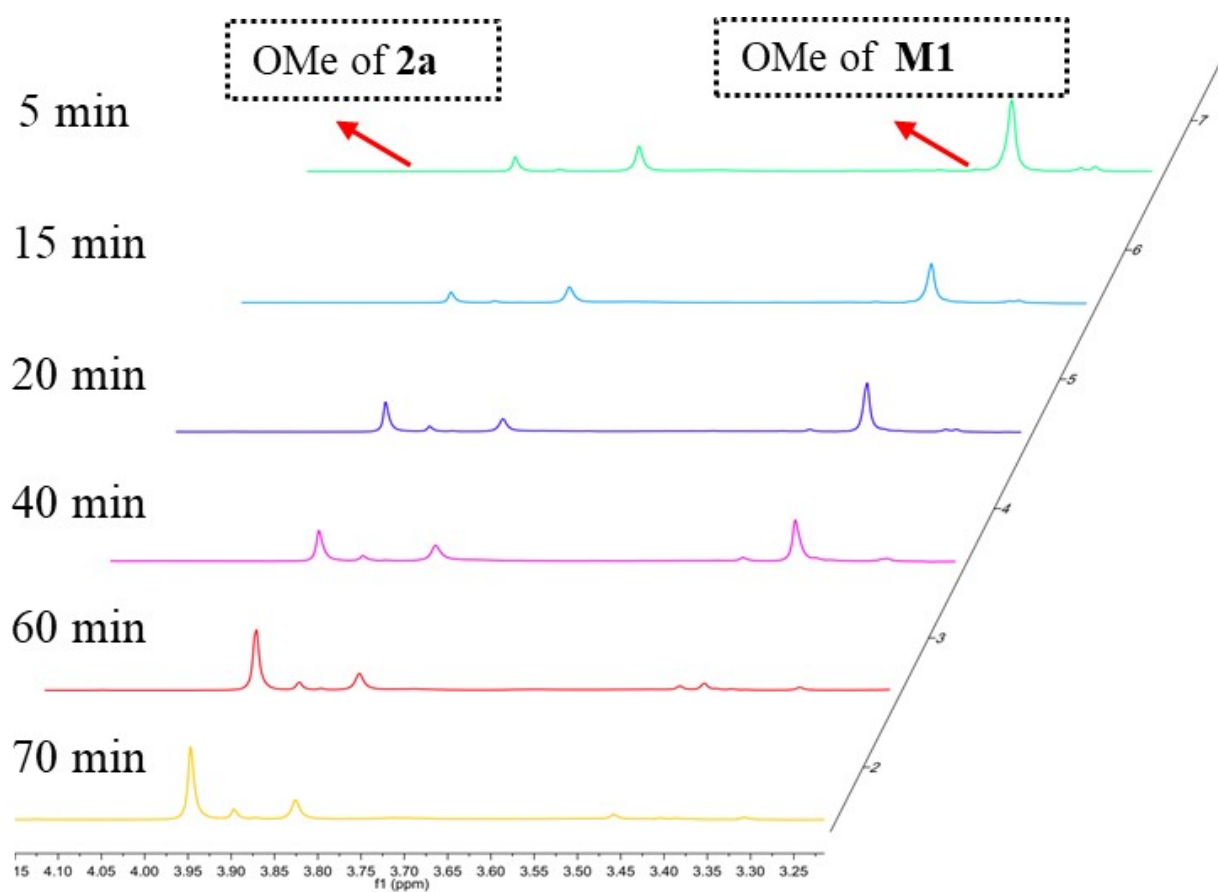

Figure 3: The reaction process is monitored by <sup>1</sup>H NMR every 5 minutes at -10 °C

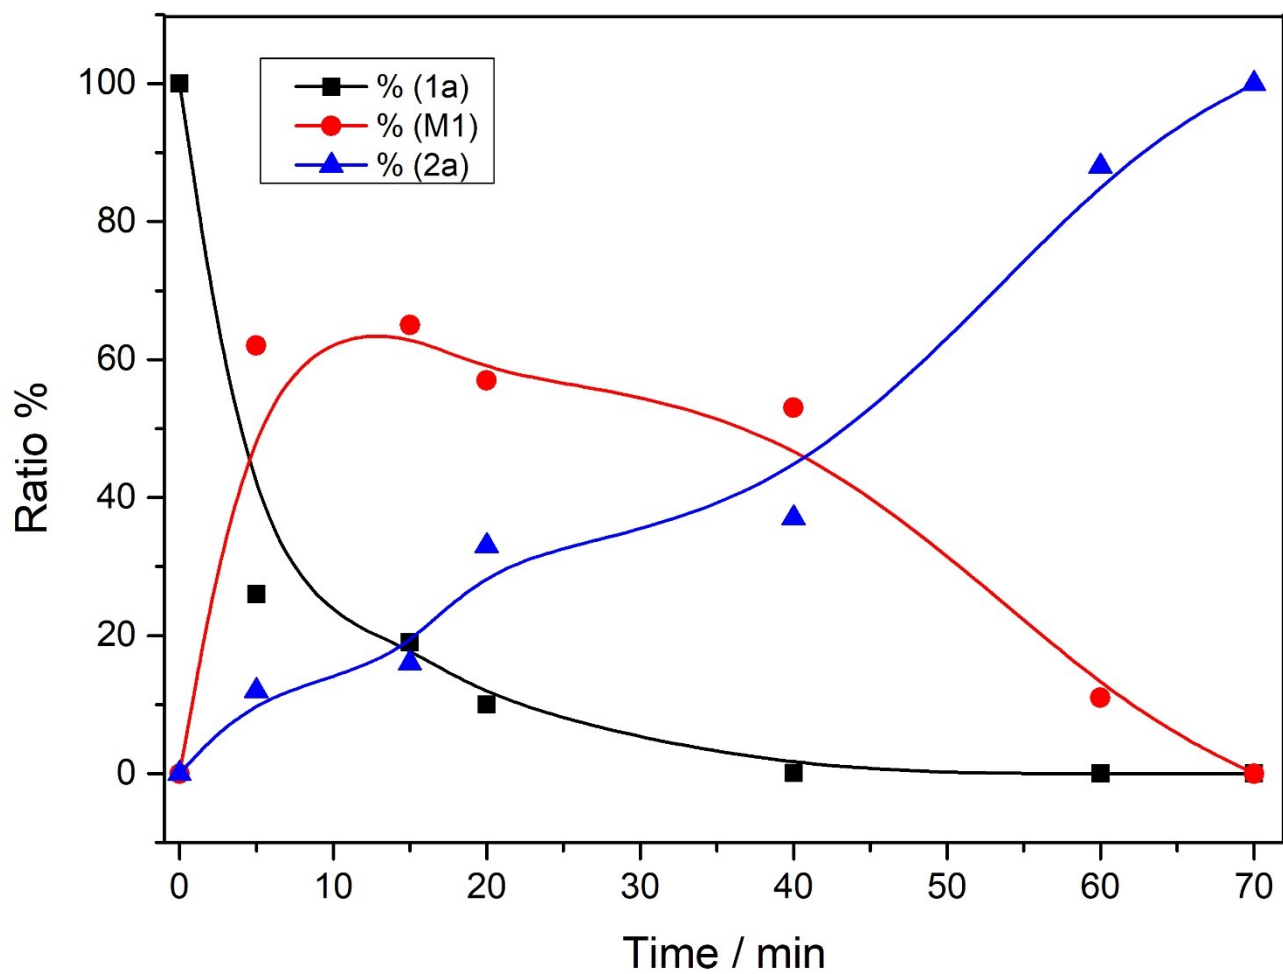

Figure 4: Equilibration process of the reaction

**(S)-1-(4-bromo-1-(hex-1-yn-1-yl)-1-methoxy-1H-isochromen-3-yl)naphthalen-2-**

**ol (M1)**

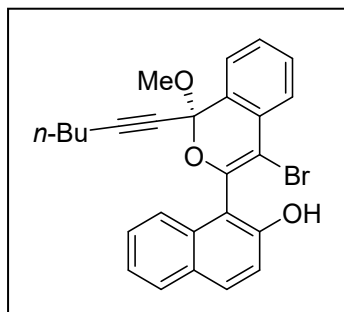

$^1\text{H NMR}$  (400 MHz, Toluene- $d_8$ ):  $\delta$  7.80 (d,  $J = 8.3$  Hz, 1H), 7.77 – 7.72 (m, 1H), 7.66 – 7.62 (m, 1H), 7.50 (dd,  $J = 8.2, 5.6$  Hz, 2H), 7.15 (m, 5H), 6.82 (s, 1H), 3.24 (s, 3H), 1.93 (t,  $J = 6.8$  Hz, 2H), 1.23 (dd,  $J = 14.1, 6.5$  Hz, 2H), 1.16 (dd,  $J = 14.6, 7.3$  Hz, 2H), 0.69 (t,  $J = 7.1$  Hz, 3H).  $^{13}\text{C NMR}$  (100 MHz, Toluene- $d_8$ ):  $\delta$  154.23, 144.51, 132.36, 132.14, 132.08, 130.30, 130.05, 129.36, 129.02, 128.48, 127.41, 127.38, 126.53, 125.76, 125.72, 124.82, 123.74, 118.55, 118.52, 114.76, 107.05, 99.14, 91.01, 74.93, 52.06, 30.49, 22.29, 18.38, 13.57. **HRMS (ESI)**  $m/z$  Calcd for  $[\text{C}_{26}\text{H}_{22}\text{BrO}_3, \text{M-H}]^-$ : 461.0831, Found: 461.0758. **HPLC analysis:** Chiralcel AD-H (Hexane/*i*-PrOH) = 90:10, flow rate = 1.0 mL/min, wave length = 254 nm,  $t_R = 4.563$  min (minor),  $t_R = 10.507$  min (major); **Physical properties:** yellow foam. (**Note:** The compound **M1** is unstable in silica gel column, which need scraper detection at  $-20$  °C)

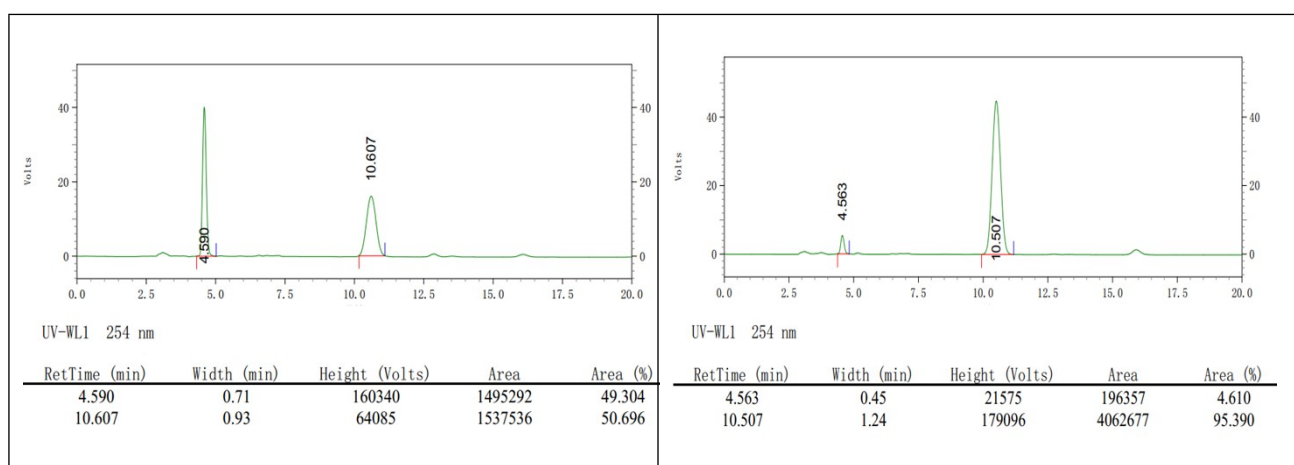

## VI. Synthetic transformation and continuous flow experiment:

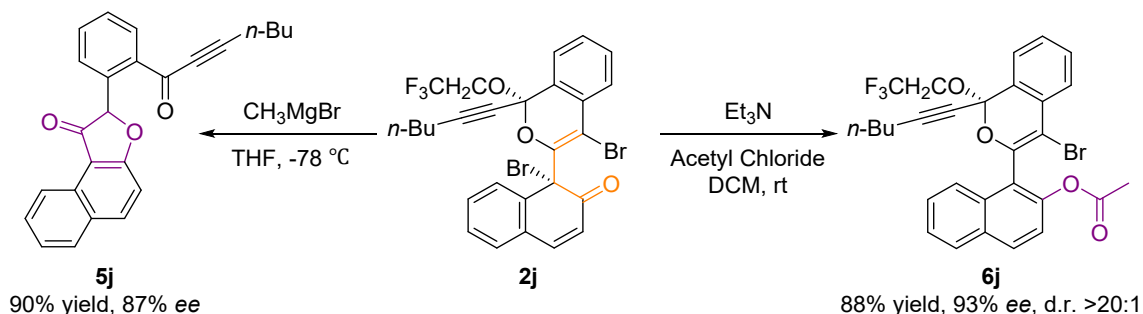

To a Pyrex Schlenk tube was added **2j** (100 mg) in dry THF (3 mL) under an argon atmosphere. To the mixture was added methylmagnesium bromide (0.3 ml, 1M in THF) by syringe at  $-78^\circ\text{C}$ . This mixture was stirred at that temperature for 2h. The resulting mixture was quenched by  $\text{H}_2\text{O}$  (3 mL) and extract by  $\text{Et}_2\text{O}$  ( $3 \times 3$  mL). The combined extracts were dried over  $\text{MgSO}_4$ . The organic phase was concentrated under reduced pressure, and the resultant residue was purified by neutral silica gel column chromatography (eluent: hexane/ $\text{EtOAc}$ , 20:1) to give the desired product **5j** as yellow oil.

A round bottom flask was charged with the **2j** (100 mg) and dissolved with DCM (5 mL). Triethylamine (0.3 mL) were subsequently added to the reaction vessel at  $20^\circ\text{C}$  after stirred 30 min, the acetyl chloride (0.1 mL) was added and stirred for 1 hours. The mixture was then quenched with 5% aq. HCl and extracted several times with  $\text{CH}_2\text{Cl}_2$ . The combined organic layers were washed with brine, dried over  $\text{MgSO}_4$ , and concentrated under reduced pressure. The crude residue was purified by flash chromatography (hexanes/ $\text{AcOEt}$  9/1) to give the desired product **7j** as yellow foam.

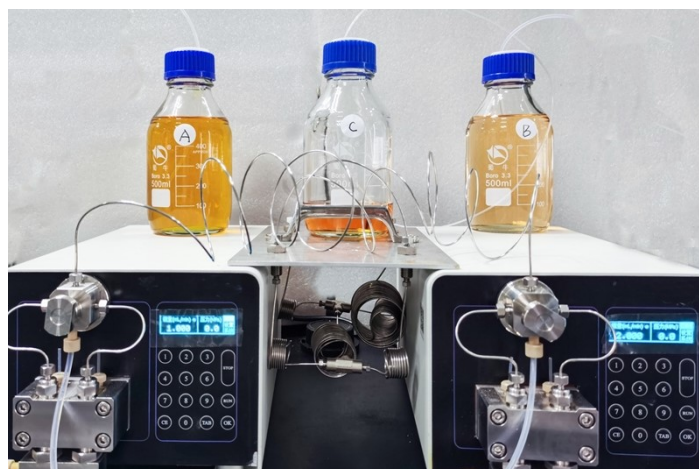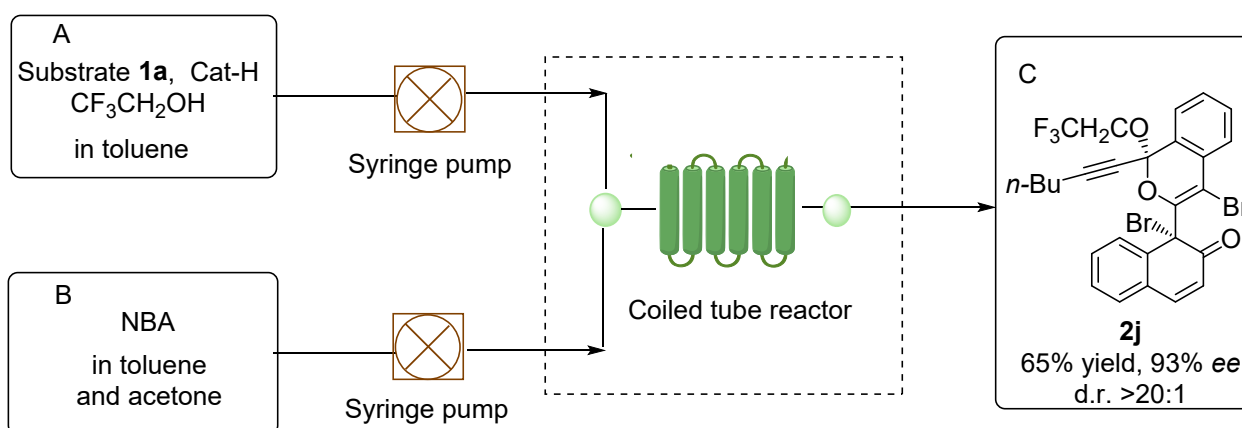

The microreactor system was placed in room temperature. A solution of  $\text{CF}_3\text{CH}_2\text{OH}$  (3.0 eq.), catalyst (0.1 eq.) and **1a** (10 g, 0.05 M in toluene) in toluene was carefully prepared and homogenized (flow rate: 1.0 mL/min). The solution of NBA (0.1 M in toluene/acetone=10:1) were introduced to coiled tube reactor by syringe pumps (flow rate: 2.0 mL/min). When finished, column chromatographic purification was carried out on silica gel ( $\text{SiO}_2$ ) with mixtures of PE/EA=10:1 as eluent (Fast process). The reaction in flow at 20 °C provides the product with a good yield and enantioselectivity. (65%, 93% ee).

## VII. <sup>1</sup>H, <sup>13</sup>C NMR and HRMS data of substrates (1a-1k, 3a-3h)

### 1-(2-((2-hydroxynaphthalen-1-yl)ethynyl)phenyl)hept-2-yn-1-one (1a)

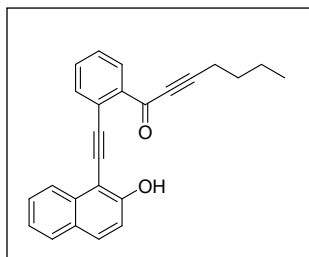

<sup>1</sup>H NMR (400 MHz, CDCl<sub>3</sub>): δ 8.81 (s, 1H), 8.36 (d, *J* = 7.8 Hz, 1H), 8.22 (d, *J* = 8.3 Hz, 1H), 7.77 (t, *J* = 7.7 Hz, 3H), 7.57 (m, 2H), 7.45 (t, *J* = 7.6 Hz, 1H), 7.35 (d, *J* = 14.8 Hz, 1H), 7.28 (d, *J* = 8.9 Hz, 1H), 2.50 (t, *J* = 7.0 Hz, 2H), 1.65 (p, *J* = 7.3 Hz, 2H), 1.49 (h, *J* = 7.2 Hz, 2H), 0.95 (t, *J* = 7.3 Hz, 3H). <sup>13</sup>C NMR (100 MHz, CDCl<sub>3</sub>): δ 177.34, 159.61, 135.47, 134.11, 133.50, 133.42, 133.15, 131.46, 128.23, 128.04, 127.54, 127.21, 124.66, 123.72, 122.95, 117.41, 102.38, 100.66, 98.11, 89.75, 80.12, 29.71, 22.06, 18.95, 13.50. HRMS (ESI) *m/z* Calcd for [C<sub>25</sub>H<sub>19</sub>O<sub>2</sub>, M - H]<sup>-</sup>: 351.1463, Found: 351.1391.

### 1-(2-((2-hydroxynaphthalen-1-yl)ethynyl)phenyl)hex-2-yn-1-one (1b)

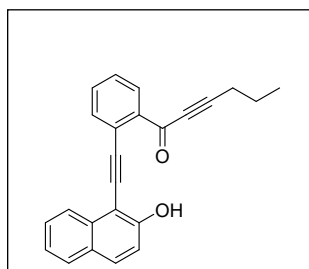

<sup>1</sup>H NMR (400 MHz, CDCl<sub>3</sub>): δ 8.81 (s, 1H), 8.37 (d, *J* = 7.9 Hz, 1H), 8.22 (d, *J* = 8.2 Hz, 1H), 7.79 (d, *J* = 8.3 Hz, 3H), 7.62 – 7.52 (m, 2H), 7.47 – 7.42 (m, 1H), 7.39 – 7.33 (m, 1H), 7.28 (d, *J* = 9.0 Hz, 1H), 2.48 (t, *J* = 7.0 Hz, 2H), 1.70 (m, 2H), 1.07 (t, *J* = 7.4 Hz, 3H). <sup>13</sup>C NMR (100 MHz, CDCl<sub>3</sub>): δ 177.34, 159.61, 135.45, 134.11, 133.49, 133.42, 133.16, 131.46, 128.23, 128.04, 127.55, 127.21, 124.66, 123.72, 122.95, 117.41, 102.38, 100.66, 97.93, 89.75, 80.24, 21.28, 21.18, 13.61. HRMS (ESI) *m/z* Calcd for [C<sub>24</sub>H<sub>17</sub>O<sub>2</sub>, M - H]<sup>-</sup>: 337.1307, Found: 337.1287.



### 1-(2-((2-hydroxynaphthalen-1-yl)ethynyl)phenyl)oct-2-yn-1-one (1c)

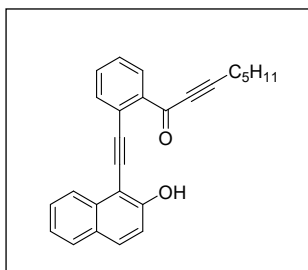

**<sup>1</sup>H NMR** (400 MHz, CDCl<sub>3</sub>): δ 8.81 (s, 1H), 8.38 (d, *J* = 7.7 Hz, 1H), 8.23 (d, *J* = 8.3 Hz, 1H), 7.82 – 7.75 (m, 3H), 7.61 (t, *J* = 7.5 Hz, 1H), 7.55 (t, *J* = 7.4 Hz, 1H), 7.46 (t, *J* = 7.6 Hz, 1H), 7.36 (t, *J* = 7.2 Hz, 1H), 7.28 (d, *J* = 8.9 Hz, 1H), 2.50 (t, *J* = 7.1 Hz, 2H),

1.68 (p, *J* = 7.2 Hz, 2H), 1.40 (m, 4H), 0.93 (t, *J* = 7.2 Hz, 3H). **<sup>13</sup>C NMR** (100 MHz, CDCl<sub>3</sub>): δ 177.37, 159.63, 135.50, 134.14, 133.51, 133.44, 133.17, 131.48, 128.24, 128.05, 127.55, 127.22, 124.67, 123.73, 122.99, 117.43, 102.38, 100.66, 98.18, 89.77, 80.14, 31.10, 27.41, 22.10, 19.24, 13.91. **HRMS (ESI)** *m/z* Calcd for [C<sub>26</sub>H<sub>21</sub>O<sub>2</sub>, M - H]<sup>-</sup>: 365.1620, Found: 365.1610.

### 1-(2-((2-hydroxynaphthalen-1-yl)ethynyl)phenyl)undec-2-yn-1-one (1d)

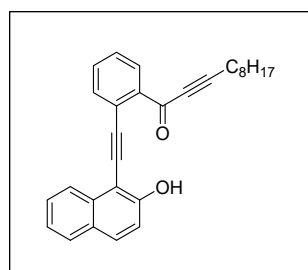

**<sup>1</sup>H NMR** (400 MHz, CDCl<sub>3</sub>): δ 8.81 (s, 1H), 8.38 (d, *J* = 7.9 Hz, 1H), 8.23 (d, *J* = 8.3 Hz, 1H), 7.78 (t, *J* = 7.6 Hz, 3H), 7.61 (t, *J* = 7.5 Hz, 1H), 7.55 (t, *J* = 7.6 Hz, 1H), 7.46 (t, *J* = 7.6 Hz, 1H), 7.36 (t, *J* = 7.4 Hz, 1H), 7.26 (d, *J* = 8.1 Hz, 1H), 2.50 (t, *J* = 7.1

Hz, 2H), 1.67 (p, *J* = 7.2 Hz, 2H), 1.53 – 1.22 (m, 10H), 0.89 (t, *J* = 6.3 Hz, 3H). **<sup>13</sup>C NMR** (100 MHz, CDCl<sub>3</sub>): δ 177.37, 159.64, 135.53, 134.14, 133.52, 133.45, 133.17, 131.48, 128.25, 128.06, 127.54, 127.22, 124.68, 123.73, 123.00, 117.44, 102.38, 100.66, 98.21, 89.79, 80.16, 31.63, 28.93, 28.70, 27.72, 22.59, 19.28, 14.07. **HRMS (ESI)** *m/z* Calcd for [C<sub>29</sub>H<sub>27</sub>O<sub>2</sub>, M - H]<sup>-</sup>: 407.2089, Found: 407.2073.

**1-(2-((2-hydroxynaphthalen-1-yl)ethynyl)phenyl)-4,4-dimethylpent-2-yn-1-one**

**(1e)**

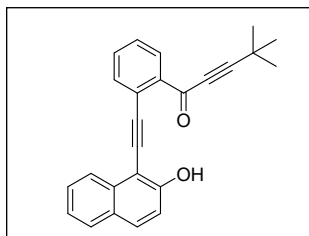

**<sup>1</sup>H NMR** (400 MHz, CDCl<sub>3</sub>): δ 8.84 (s, 1H), 8.34 (d, *J* = 7.9 Hz, 1H), 8.22 (d, *J* = 8.3 Hz, 1H), 7.82 – 7.74 (m, 3H), 7.62 – 7.52 (m, 2H), 7.46 (t, *J* = 7.6 Hz, 1H), 7.35 (d, *J* = 14.9 Hz, 1H), 7.28

(d, *J* = 8.9 Hz, 1H), 1.38 (s, 9H). **<sup>13</sup>C NMR** (100 MHz, CDCl<sub>3</sub>): δ 177.48, 159.63, 135.60, 134.00, 133.49, 133.42, 133.12, 131.46, 128.23, 128.05, 127.55, 127.21, 124.67, 123.72, 122.96, 117.41, 105.03, 102.39, 100.69, 89.71, 78.66, 30.05, 28.09.

**HRMS (ESI)** *m/z* Calcd for [C<sub>25</sub>H<sub>19</sub>O<sub>2</sub>, M - H]<sup>-</sup>: 351.1463, Found: 351.1442.

**3-cyclopropyl-1-(2-((2-hydroxynaphthalen-1-yl)ethynyl)phenyl)prop-2-yn-1-one**

**(1f)**

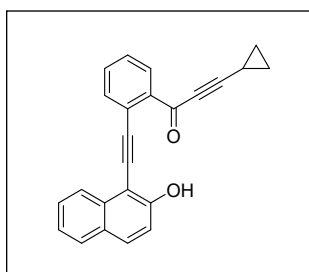

**<sup>1</sup>H NMR** (400 MHz, CDCl<sub>3</sub>): δ 8.80 (s, 1H), 8.32 (d, *J* = 7.8 Hz, 1H), 8.22 (d, *J* = 8.2 Hz, 1H), 7.81 – 7.74 (m, 3H), 7.57 (m, 2H), 7.45 (t, *J* = 7.6 Hz, 1H), 7.36 (t, *J* = 7.4 Hz, 1H), 7.27 (d, *J* = 9.0 Hz, 1H), 1.54 (p, *J* = 7.5 Hz, 1H), 1.05 (d, *J* = 8.0 Hz, 4H). **<sup>13</sup>C**

**NMR** (100 MHz, CDCl<sub>3</sub>): δ 177.04, 159.64, 135.61, 133.97, 133.52, 133.40, 133.05, 131.45, 128.24, 128.06, 127.52, 127.21, 124.68, 123.72, 122.89, 117.44, 102.47, 102.40, 100.64, 89.73, 76.13, 10.06, 0.12. **HRMS (ESI)** *m/z* Calcd for [C<sub>24</sub>H<sub>15</sub>O<sub>2</sub>, M - H]<sup>-</sup>: 335.1150, Found: 335.1123.

**1-(2-((2-hydroxynaphthalen-1-yl)ethynyl)phenyl)-3-phenylprop-2-yn-1-one (1g)**

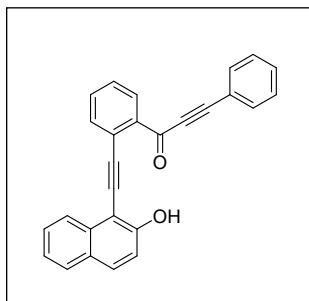

**<sup>1</sup>H NMR** (400 MHz, CDCl<sub>3</sub>): δ 8.87 (s, 1H), 8.42 (d, *J* = 7.9 Hz, 1H), 8.22 (d, *J* = 8.3 Hz, 1H), 7.76 (t, *J* = 8.1 Hz, 3H), 7.65 (d, *J* = 7.9 Hz, 2H), 7.56 (dt, *J* = 15.3, 7.7 Hz, 2H), 7.45 (t, *J* = 7.4 Hz, 2H), 7.37 (dd, *J* = 13.7, 6.9 Hz, 3H), 7.28 (d, *J* = 9.0 Hz, 1H). **<sup>13</sup>C**

**NMR** (100 MHz, CDCl<sub>3</sub>): δ 177.02, 159.62, 135.28, 134.00, 133.50, 133.47, 133.36, 133.06, 131.53, 130.92, 128.62, 128.22, 128.02, 127.61, 127.24, 124.66, 123.74, 123.03, 119.79, 117.37, 102.39, 100.72, 94.17, 89.96, 87.34. **HRMS (ESI)** *m/z* Calcd for [C<sub>27</sub>H<sub>15</sub>O<sub>2</sub>, M - H]<sup>-</sup>: 371.1150, Found: 371.1123.

**1-(2-((2-hydroxynaphthalen-1-yl)ethynyl)phenyl)-3-(p-tolyl)prop-2-yn-1-one (1h)**

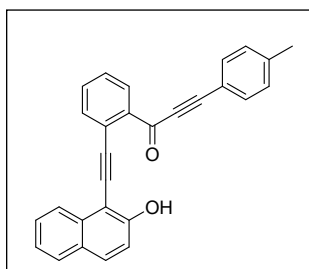

**<sup>1</sup>H NMR** (400 MHz, CDCl<sub>3</sub>): δ 8.87 (s, 1H), 8.46 (d, *J* = 7.7 Hz, 1H), 8.23 (d, *J* = 8.2 Hz, 1H), 7.78 (t, *J* = 8.4 Hz, 3H), 7.62 (t, *J* = 7.5 Hz, 1H), 7.55 (t, *J* = 8.4 Hz, 3H), 7.49 (t, *J* = 7.5 Hz, 1H), 7.36 (t, *J* = 7.4 Hz, 1H), 7.29 (d, *J* = 8.9 Hz, 1H), 7.20 (d, *J* = 7.5

Hz, 2H), 2.38 (s, 3H). **<sup>13</sup>C NMR** (100 MHz, CDCl<sub>3</sub>): δ 177.15, 159.70, 141.79, 135.56, 134.00, 133.52, 133.28, 133.16, 131.52, 129.48, 128.26, 128.08, 127.64, 127.25, 124.70, 123.75, 123.08, 117.44, 116.76, 102.43, 100.73, 94.99, 89.94, 87.37, 21.78.

**HRMS (ESI)** *m/z* Calcd for [C<sub>28</sub>H<sub>17</sub>O<sub>2</sub>, M - H]<sup>-</sup>: 385.1307, Found: 385.1286

### 1-(2-((2-hydroxynaphthalen-1-yl)ethynyl)-4-methylphenyl)hept-2-yn-1-one (1i)

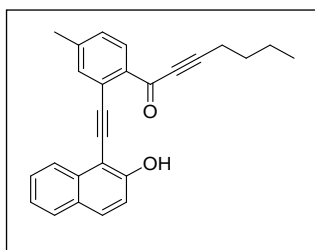

**<sup>1</sup>H NMR** (400 MHz, CDCl<sub>3</sub>): δ 8.89 (s, 1H), 8.23 (dd, *J* = 8.1, 3.8 Hz, 2H), 7.77 (dd, *J* = 8.2, 5.5 Hz, 2H), 7.55 (d, *J* = 5.8 Hz, 2H), 7.35 (t, *J* = 7.4 Hz, 1H), 7.27 (d, *J* = 8.9 Hz, 1H), 7.23 (d, *J* = 9.6 Hz, 1H), 2.49 (t, *J* = 7.1 Hz, 2H), 2.44 (s, 3H), 1.65 (p, *J* = 7.0 Hz, 2H), 1.49 (h, *J* = 7.2 Hz, 2H), 0.96 (t, *J* = 7.3 Hz, 3H). **<sup>13</sup>C NMR** (100 MHz, CDCl<sub>3</sub>): δ 176.99, 159.66, 144.35, 134.36, 133.88, 133.52, 133.21, 131.35, 128.53, 128.21, 128.03, 127.15, 124.70, 123.67, 122.91, 117.45, 102.45, 100.84, 97.43, 89.29, 80.15, 29.75, 22.06, 21.47, 18.94, 13.52. **HRMS (ESI)** *m/z* Calcd for [C<sub>26</sub>H<sub>21</sub>O<sub>2</sub>, M - H]<sup>-</sup>: 365.1620, Found: 365.1598

### 1-(2-fluoro-6-((2-hydroxynaphthalen-1-yl)ethynyl)phenyl)hept-2-yn-1-one (1j)

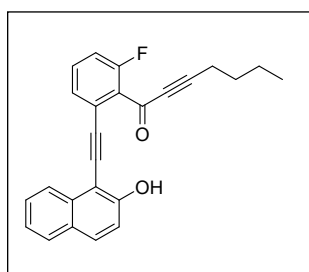

**<sup>1</sup>H NMR** (400 MHz, CDCl<sub>3</sub>): δ 8.63 (s, 1H), 8.16 (d, *J* = 8.3 Hz, 1H), 7.99 (dd, *J* = 9.2, 2.7 Hz, 1H), 7.80 – 7.69 (m, 3H), 7.56 – 7.49 (m, 1H), 7.37 – 7.32 (m, 1H), 7.31 – 7.23 (m, 2H), 2.50 (t, *J* = 7.1 Hz, 2H), 1.70 – 1.61 (m, 2H), 1.49 (dq, *J* = 14.4, 7.3 Hz, 2H), 0.96 (t, *J* = 7.3 Hz, 3H). **<sup>13</sup>C NMR** (100 MHz, CDCl<sub>3</sub>): δ 175.94 (d, *J* = 2.0 Hz), 161.07 (d, *J* = 249.0 Hz), 159.42, 137.08 (d, *J* = 6.0 Hz), 135.22 (d, *J* = 8.0 Hz), 133.41, 131.47, 128.24, 128.04, 127.23, 124.59, 123.75, 120.75 (d, *J* = 23.0 Hz), 120.39 (d, *J* = 24.0 Hz), 119.10 (d, *J* = 4.0 Hz), 117.35, 102.23, 99.63, 98.87, 89.38, 79.74, 29.63, 22.07, 18.95, 13.48. **HRMS (ESI)** *m/z* Calcd for [C<sub>25</sub>H<sub>18</sub>FO<sub>2</sub>, M - H]<sup>-</sup>: 369.1369, Found: 369.1341

**1-(2-((2-hydroxynaphthalen-1-yl)ethynyl)phenyl)ethan-1-one (1k)**

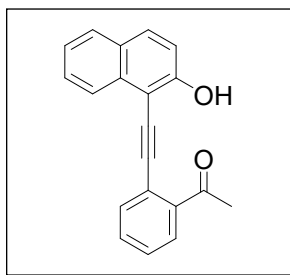

**<sup>1</sup>H NMR** (400 MHz, CDCl<sub>3</sub>) δ 8.96 (s, 1H), 8.21 (d, *J* = 8.3 Hz, 1H), 7.93 (d, *J* = 7.9 Hz, 1H), 7.77 (dd, *J* = 7.8, 5.1 Hz, 3H), 7.55 (t, *J* = 7.5 Hz, 2H), 7.42 – 7.33 (m, 2H), 7.28 (d, *J* = 8.9 Hz, 1H), 2.68 (s, 3H). **<sup>13</sup>C NMR** (100 MHz, CDCl<sub>3</sub>) δ 198.40, 159.50, 135.94, 133.74, 133.47, 132.49, 131.28, 130.92, 128.22, 128.05, 127.63, 127.18, 124.69, 123.71, 122.43, 117.34, 102.51, 101.04, 88.61, 28.18. **HRMS (ESI)** *m/z* Calcd for [C<sub>20</sub>H<sub>12</sub>O<sub>2</sub>, M - H]<sup>-</sup>: 286.0994, Found: 285.0972.

**(E)-1-(2-((2-hydroxynaphthalen-1-yl)ethynyl)phenyl)-3-phenylprop-2-en-1-one**

**(3a)**

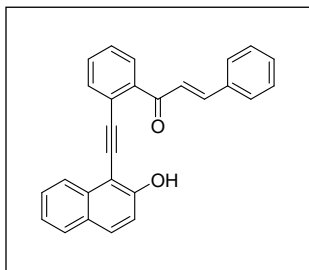

$^1\text{H NMR}$  (400 MHz,  $\text{CDCl}_3$ ):  $\delta$  8.74 (s, 1H), 8.21 (d,  $J = 8.3$  Hz, 1H), 7.91 (d,  $J = 7.8$  Hz, 1H), 7.84 (d,  $J = 15.7$  Hz, 1H), 7.80 – 7.73 (m, 3H), 7.62 – 7.56 (m, 2H), 7.53 (t,  $J = 7.5$  Hz, 2H), 7.47 – 7.39 (m, 2H), 7.39 – 7.32 (m, 4H), 7.28 (d,  $J = 8.9$  Hz, 1H).

$^{13}\text{C NMR}$  (100 MHz,  $\text{CDCl}_3$ ):  $\delta$  190.84, 159.29, 146.20, 138.01, 134.49, 133.44, 133.41, 131.89, 131.17, 130.76, 129.68, 128.90, 128.56, 128.19, 128.08, 127.56, 127.17, 124.75, 123.72, 123.28, 122.92, 117.32, 102.54, 100.34, 88.56. **HRMS (ESI)**  $m/z$  Calcd for  $[\text{C}_{27}\text{H}_{17}\text{O}_2, \text{M} - \text{H}]^-$ : 373.1307, Found: 373.1297

**(E)-1-(2-((2-hydroxynaphthalen-1-yl)ethynyl)phenyl)-3-(p-tolyl)prop-2-en-1-one**

**(3b)**

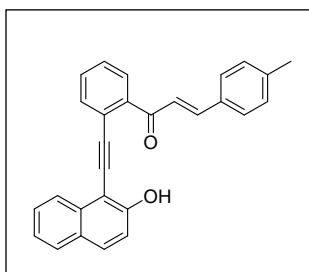

$^1\text{H NMR}$  (400 MHz,  $\text{CDCl}_3$ ):  $\delta$  8.75 (s, 1H), 8.22 (d,  $J = 8.2$  Hz, 1H), 7.93 (d,  $J = 7.7$  Hz, 1H), 7.87 – 7.73 (m, 4H), 7.53 (dt,  $J = 14.4, 7.6$  Hz, 4H), 7.42 (dd,  $J = 15.6, 9.6$  Hz, 2H), 7.35 (t,  $J = 7.4$  Hz, 1H), 7.29 (d,  $J = 8.9$  Hz, 1H), 7.19 (d,  $J = 7.8$  Hz, 2H),

2.35 (s, 3H).  $^{13}\text{C NMR}$  (100 MHz,  $\text{CDCl}_3$ ):  $\delta$  191.05, 159.32, 146.43, 141.44, 138.29, 133.45, 133.38, 131.80, 131.14, 129.69, 129.65, 128.64, 128.20, 128.09, 127.57, 127.16, 124.78, 123.72, 122.90, 122.34, 117.36, 102.56, 100.33, 88.50, 21.53. **HRMS (ESI)**  $m/z$  Calcd for  $[\text{C}_{28}\text{H}_{19}\text{O}_2, \text{M} - \text{H}]^-$ : 387.1463, Found: 387.1441

**(E)-3-(4-fluorophenyl)-1-(2-((2-hydroxynaphthalen-1-yl)ethynyl)phenyl)prop-2-**

**en-1-one (3c)**

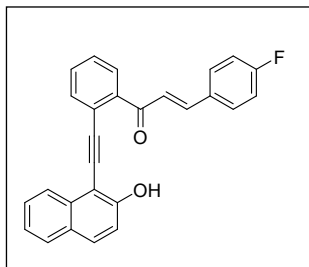

$^1\text{H NMR}$  (400 MHz,  $\text{CDCl}_3$ ):  $\delta$  8.71 (s, 1H), 8.20 (d,  $J = 8.3$  Hz, 1H), 7.89 (d,  $J = 7.8$  Hz, 1H), 7.81 – 7.71 (m, 4H), 7.59 – 7.49 (m, 4H), 7.40 (d,  $J = 7.6$  Hz, 1H), 7.37 (d,  $J = 5.2$  Hz, 1H), 7.33 (d,  $J = 7.6$  Hz, 1H), 7.27 (d,  $J = 8.9$  Hz, 1H), 7.04 (t,  $J = 8.5$  Hz, 2H).  $^{13}\text{C NMR}$  (100 MHz,  $\text{CDCl}_3$ ):  $\delta$  190.54, 164.10 (d,  $J = 251.0$  Hz), 159.26, 144.77, 137.90, 133.42, 131.93, 131.20, 130.77 (d,  $J = 3.0$  Hz), 130.53, 130.45, 129.63, 128.21, 128.09, 127.57, 127.19, 124.72, 123.75, 122.91, 117.29, 116.18, 115.96, 102.51, 100.34, 88.59. **HRMS (ESI)**  $m/z$  Calcd for  $[\text{C}_{27}\text{H}_{16}\text{FO}_2, \text{M} - \text{H}]^-$ : 391.1213, Found: 391.1210

**(E)-3-(4-chlorophenyl)-1-(2-((2-hydroxynaphthalen-1-yl)ethynyl)phenyl)prop-2-**

**en-1-one (3d)**

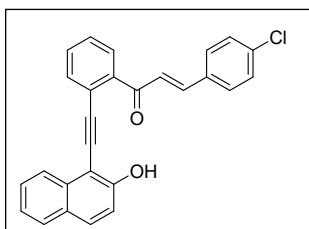

$^1\text{H NMR}$  (400 MHz,  $\text{CDCl}_3$ ):  $\delta$  8.71 (s, 1H), 8.19 (d,  $J = 8.3$  Hz, 1H), 7.88 (d,  $J = 7.8$  Hz, 1H), 7.79 – 7.71 (m, 4H), 7.52 (m, 2H), 7.48 (d,  $J = 8.4$  Hz, 2H), 7.37 (m, 3H), 7.31 (d,  $J = 8.5$  Hz, 2H), 7.27 (d,  $J = 8.9$  Hz, 1H).  $^{13}\text{C NMR}$  (100 MHz,  $\text{CDCl}_3$ ):  $\delta$  190.34, 159.26, 144.50, 137.71, 136.60, 133.45, 133.42, 132.97, 132.01, 131.23, 129.66, 129.15, 128.21, 128.08, 127.56, 127.20, 124.71, 123.75, 123.52, 122.95, 117.28, 102.50, 100.37, 88.66. **HRMS (ESI)**  $m/z$  Calcd for  $[\text{C}_{27}\text{H}_{16}\text{ClO}_2, \text{M} - \text{H}]^-$ : 407.0917, Found: 407.0911

**(E)-1-(2-((2-hydroxynaphthalen-1-yl)ethynyl)phenyl)-3-(4-**

**(trifluoromethyl)phenyl)prop-2-en-1-one (3e)**

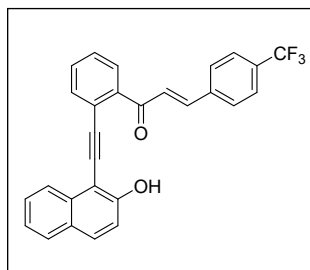

**<sup>1</sup>H NMR** (400 MHz, CDCl<sub>3</sub>): δ 8.63 (s, 1H), 8.20 (d, *J* = 8.3 Hz, 1H), 7.95 (d, *J* = 7.9 Hz, 1H), 7.88 – 7.74 (m, 4H), 7.69 (d, *J* = 8.1 Hz, 2H), 7.66 – 7.49 (m, 5H), 7.45 (t, *J* = 7.6 Hz, 1H), 7.36 (t, *J* = 7.4 Hz, 1H), 7.27 (d, *J* = 8.9 Hz, 1H). **<sup>13</sup>C NMR** (100 MHz,

CDCl<sub>3</sub>): δ 190.31, 159.29, 143.97, 137.75 (d, *J* = 34.0 Hz), 133.62, 133.48, 132.51, 132.28, 132.03 (d, *J* = 33.0 Hz), 131.54, 131.36, 129.81, 128.61, 128.27, 128.16, 127.67, 127.27, 125.89, 125.85, 125.46, 123.76 (q, *J* = 270.0 Hz), 124.73, 123.83, 123.17, 117.30, 102.47, 100.29, 88.88. **HRMS (ESI)** *m/z* Calcd for [C<sub>28</sub>H<sub>16</sub>F<sub>3</sub>O<sub>2</sub>, M - H]: 441.1181, Found: 441.1167

**(E)-1-(2-((2-hydroxynaphthalen-1-yl)ethynyl)phenyl)-3-(naphthalen-1-yl)prop-2-**

**en-1-one (3f)**

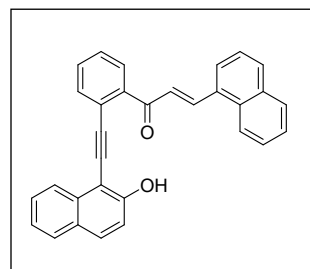

**<sup>1</sup>H NMR** (400 MHz, CDCl<sub>3</sub>): δ 8.81 – 8.66 (m, 2H), 8.24 (d, *J* = 8.2 Hz, 2H), 8.00 (d, *J* = 6.8 Hz, 1H), 7.88 (dd, *J* = 15.5, 7.4 Hz, 4H), 7.81 – 7.74 (m, 2H), 7.62 – 7.42 (m, 7H), 7.35 (t, *J* = 7.4 Hz, 1H), 7.30 (d, *J* = 8.9 Hz, 1H). **<sup>13</sup>C NMR** (100 MHz, CDCl<sub>3</sub>):

δ 190.69, 159.35, 143.07, 138.12, 133.69, 133.55, 133.52, 132.01, 131.70, 131.24, 131.10, 129.84, 128.73, 128.23, 128.16, 127.65, 127.22, 127.05, 126.33, 125.96, 125.38, 125.31, 124.80, 123.76, 123.48, 123.12, 117.37, 102.58, 100.38, 88.74. **HRMS (ESI)** *m/z* Calcd for [C<sub>31</sub>H<sub>19</sub>O<sub>2</sub>, M - H]: 423.1463, Found: 423.1441



**(E)-1-(2-((2-hydroxynaphthalen-1-yl)ethynyl)phenyl)-3-(thiophen-2-yl)prop-2-**

**en-1-one (3g)**

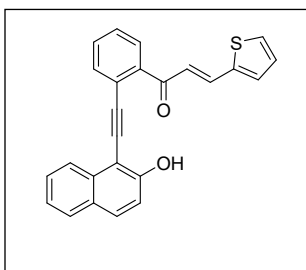

**<sup>1</sup>H NMR** (400 MHz, CDCl<sub>3</sub>): δ 8.78 (s, 1H), 8.21 (d, *J* = 8.3 Hz, 1H), 7.99 (d, *J* = 15.3 Hz, 1H), 7.90 (d, *J* = 7.8 Hz, 1H), 7.81 – 7.72 (m, 3H), 7.53 (t, *J* = 7.5 Hz, 2H), 7.45 – 7.31 (m, 4H), 7.31 – 7.20 (m, 2H), 7.04 (t, *J* = 4.3 Hz, 1H). **<sup>13</sup>C NMR** (100 MHz,

CDCl<sub>3</sub>): δ 190.13, 159.32, 140.04, 138.56, 137.97, 133.44, 133.39, 132.57, 131.88, 131.15, 129.52, 129.40, 128.41, 128.18, 128.07, 127.59, 127.16, 124.76, 123.71, 122.90, 121.87, 117.33, 102.56, 100.38, 88.58. **HRMS (ESI)** *m/z* Calcd for [C<sub>25</sub>H<sub>15</sub>O<sub>2</sub>S, M - H]<sup>-</sup>: 379.0871, Found: 379.0851

**(E)-1-(2-((6-(3,5-dimethylphenyl)-2-hydroxynaphthalen-1-yl)ethynyl)phenyl)-3-**

**phenylprop-2-en-1-one (3h)**

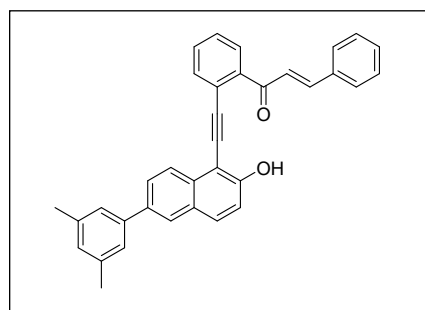

**<sup>1</sup>H NMR** (400 MHz, CDCl<sub>3</sub>): δ 8.73 (s, 1H), 8.24 (d, *J* = 8.6 Hz, 1H), 7.97 – 7.73 (m, 6H), 7.63 – 7.51 (m, 3H), 7.48 – 7.35 (m, 5H), 7.29 (d, *J* = 8.0 Hz, 3H), 6.99 (s, 1H), 2.40 (s, 6H). **<sup>13</sup>C NMR** (100 MHz, CDCl<sub>3</sub>): δ

190.88, 159.31, 146.22, 140.89, 138.27, 138.11, 136.75, 134.56, 133.45, 132.59, 131.89, 131.42, 130.77, 129.68, 128.93, 128.79, 128.59, 128.36, 127.58, 126.91, 126.06, 125.18, 125.09, 123.36, 122.95, 117.67, 102.48, 100.31, 88.61, 21.42. **HRMS (ESI)** *m/z* Calcd for [C<sub>35</sub>H<sub>25</sub>O<sub>2</sub>, M - H]<sup>-</sup>: 477.1933, Found: 477.1910

VIII.  $^1\text{H}$ ,  $^{13}\text{C}$  NMR, HRMS data and HPLC traces of products (2a-2w, 4a-4j, 5j, 6j)

**(R)-1-bromo-1-((S)-4-bromo-1-(hex-1-yn-1-yl)-1-methoxy-1H-isochromen-3-yl)naphthalen-2(1H)-one (2a)**

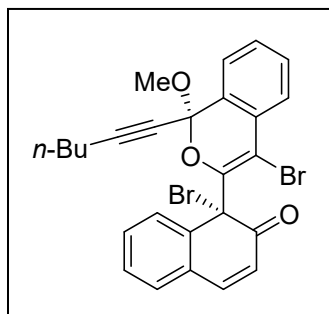

$^1\text{H}$  NMR (400 MHz, Toluene- $d_8$ )  $\delta$  7.87 (d,  $J = 7.5$  Hz, 1H), 7.33 (t,  $J = 7.1$  Hz, 2H), 7.10 (t,  $J = 7.5$  Hz, 1H), 7.02 (t,  $J = 7.6$  Hz, 1H), 6.78 (m, 4H), 6.22 (d,  $J = 10.0$  Hz, 1H), 3.95 (s, 3H), 2.08 (t,  $J = 6.8$  Hz, 2H), 1.32 (m, 4H), 0.78 (t,  $J = 7.0$  Hz, 3H).

$^{13}\text{C}$  NMR (100 MHz, Toluene- $d_8$ ):  $\delta$  188.99, 146.64, 142.76, 142.70, 131.09, 130.73, 129.86, 129.70, 129.49, 128.76, 128.71, 128.52, 128.43, 125.91, 124.50, 124.30, 102.55, 99.99, 89.93, 76.01, 63.28, 53.42, 30.68, 22.37, 18.54, 13.69. **HRMS (ESI)**  $m/z$  Calcd for  $[\text{C}_{26}\text{H}_{22}\text{Br}_2\text{NaO}_3, \text{M} + \text{Na}]^+$ : 562.9936, Found: 562.9828. **HPLC analysis:** Chiralcel IA-H (Hexane/*i*-PrOH) = 80:20, flow rate = 1.0 mL/min, wave length = 254 nm,  $t_R = 4.811$  min (major),  $t_R = 5.939$  min (minor). **Optical Rotation:**  $[\alpha]_D^{20} = 95^\circ$  ( $c = 1.0$ ,  $\text{CH}_3\text{OH}$ ); **Physical properties:** yellow foam; **Yield:** ( $\text{SiO}_2$ , PE:EA = 10:1) 88%, 47.4 mg.

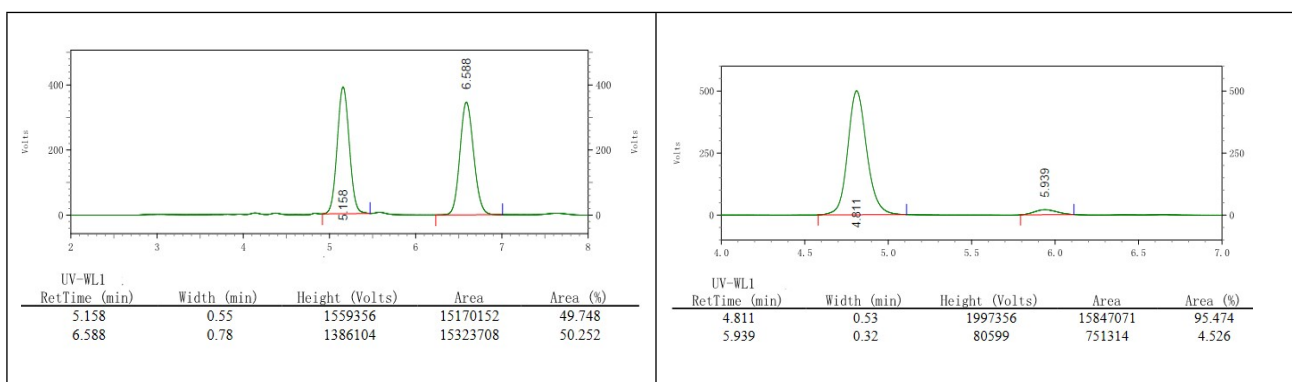

**(R)-1-bromo-1-((S)-4-bromo-1-ethoxy-1-(hex-1-yn-1-yl)-1H-isochromen-3-yl)naphthalen-2(1H)-one (2b)**

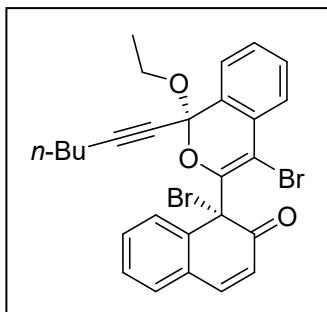

$^1\text{H NMR}$  (400 MHz,  $(\text{CD}_3)_2\text{CO}$ ):  $\delta$  7.76 – 7.72 (m, 2H), 7.61 – 7.58 (m, 1H), 7.51 – 7.39 (m, 6H), 6.44 (d,  $J = 10.0$  Hz, 1H), 4.23 – 4.10 (m, 2H), 2.52 (t,  $J = 7.0$  Hz, 2H), 1.71 – 1.63 (m, 2H), 1.59 – 1.50 (m, 2H), 1.27 (t,  $J = 7.1$  Hz, 3H), 0.97 (t,  $J = 7.3$  Hz, 3H).  $^{13}\text{C NMR}$  (100 MHz,  $(\text{CD}_3)_2\text{CO}$ ):  $\delta$  189.80, 147.05,

144.21, 142.83, 131.69, 131.33, 130.63, 130.61, 130.07, 129.62, 129.37, 129.13, 128.85, 126.29, 124.59, 124.48, 102.16, 99.43, 90.76, 76.23, 63.56, 62.02, 31.06, 22.62, 18.66, 15.06, 13.85. **HRMS (ESI)**  $m/z$  Calcd for  $[\text{C}_{27}\text{H}_{24}\text{Br}_2\text{NaO}_3, \text{M} + \text{Na}]^+$ : 577.0092, Found: 577.0010. **HPLC analysis:** Chiralcel IA-H (Hexane/*i*-PrOH) = 98:2, flow rate = 1.0 mL/min, wave length = 254 nm,  $t_{\text{R}} = 6.968$  min (major),  $t_{\text{R}} = 7.569$  min (minor).

**Optical Rotation:**  $[\alpha]_D^{20} = 99^\circ$  ( $c = 1.0$ ,  $\text{CH}_3\text{OH}$ ); **Physical properties:** yellow foam;

**Yield:** ( $\text{SiO}_2$ , PE:EA= 10:1) 75%, 41.6 mg.

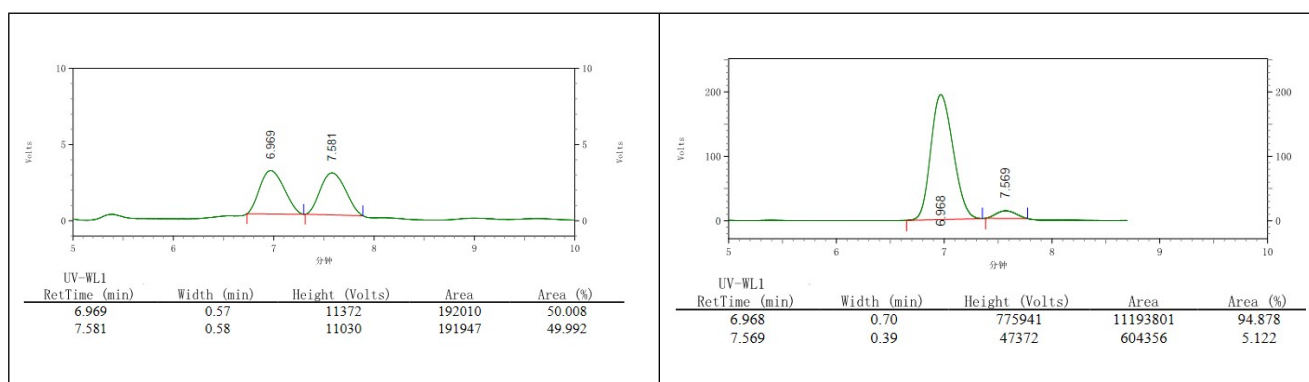

**(R)-1-bromo-1-((S)-4-bromo-1-(hex-1-yn-1-yl)-1-propoxy-1H-isochromen-3-yl)naphthalen-2(1H)-one (2c)**

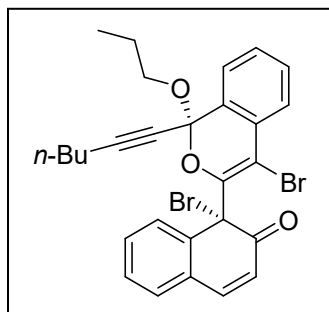

**<sup>1</sup>H NMR** (400 MHz, CDCl<sub>3</sub>): δ 7.74 – 7.68 (m, 1H), 7.46 (m, 2H), 7.40 – 7.28 (m, 6H), 6.43 (d, *J* = 9.9 Hz, 1H), 4.12 – 4.01 (m, 2H), 2.44 (t, *J* = 6.9 Hz, 2H), 1.82 – 1.60 (m, 4H), 1.53 (dt, *J* = 14.4, 6.9 Hz, 2H), 0.97 (t, *J* = 7.1 Hz, 6H). **<sup>13</sup>C NMR** (100 MHz, CDCl<sub>3</sub>): δ 189.50, 145.73, 142.96, 141.98, 130.69,

130.36, 129.46, 129.34, 128.91, 128.65, 128.38, 128.36, 127.88, 125.44, 124.14, 123.94, 101.71, 98.70, 89.55, 75.83, 67.75, 62.56, 30.31, 22.52, 22.02, 18.47, 13.59, 10.60. **HRMS (ESI)** *m/z* Calcd for [C<sub>28</sub>H<sub>26</sub>Br<sub>2</sub>NaO<sub>3</sub>, M+ Na]<sup>+</sup>: 591.0249, Found: 591.0195. **HPLC analysis:** Chiralcel IC-H (Hexane/*i*-PrOH) = 90:10, flow rate = 1.0 mL/min, wave length = 254 nm, *t*<sub>R</sub> = 5.601 min (major), *t*<sub>R</sub> = 6.384 min (minor). **Optical Rotation:** [α]<sub>D</sub><sup>20</sup> = 103° (c = 1.0, CHCl<sub>3</sub>); **Physical properties:** yellow foam; **Yield:** (SiO<sub>2</sub>, PE:EA= 10:1) 77%, 43.7 mg.

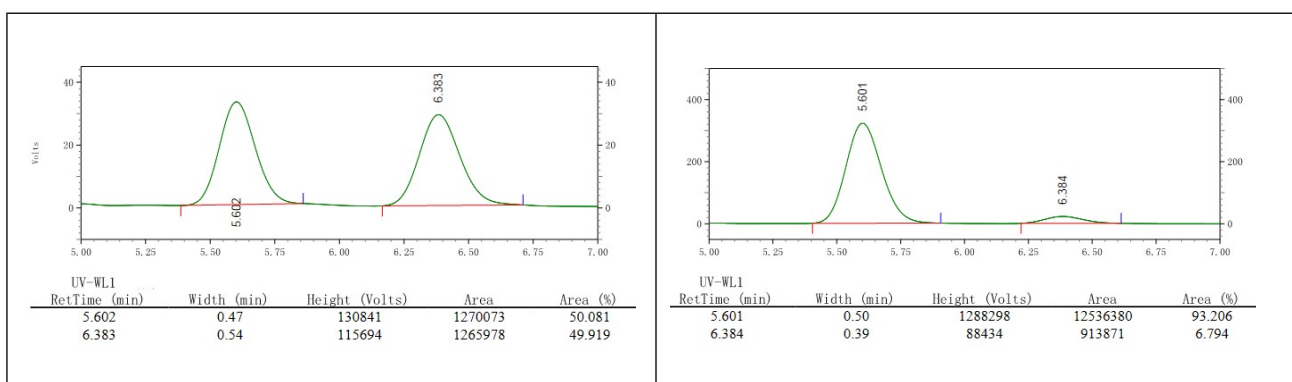

**(R)-1-bromo-1-((S)-4-bromo-1-(cyclobutylmethoxy)-1-(hex-1-yn-1-yl)-1H-**

**isochromen-3-yl)naphthalen-2(1H)-one (2d)**

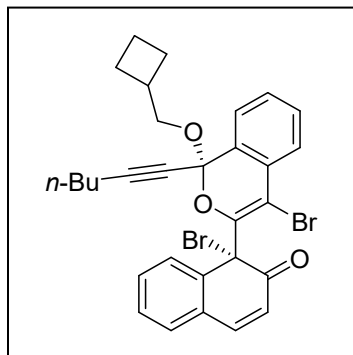

**<sup>1</sup>H NMR** (400 MHz, Toluene-*d*<sub>8</sub>): δ 8.01 (d, *J* = 7.6 Hz, 1H), 7.51 (d, *J* = 7.7 Hz, 1H), 7.41 (d, *J* = 7.7 Hz, 1H), 7.20 (t, *J* = 7.5 Hz, 1H), 7.15 – 7.10 (m, 1H), 6.97 – 6.91 (m, 1H), 6.91 – 6.81 (m, 3H), 6.32 (d, *J* = 10.0 Hz, 1H), 4.64 (dd, *J* = 9.1, 6.5 Hz, 1H), 4.59 – 4.53 (m, 1H), 3.00 (m, 1H), 2.26 – 2.15 (m,

5H), 2.12 – 1.97 (m, 2H), 1.97 – 1.89 (m, 1H), 1.56 – 1.38 (m, 4H), 0.90 (t, *J* = 7.1 Hz,

3H). **<sup>13</sup>C NMR** (100 MHz, Toluene-*d*<sub>8</sub>): δ 188.83, 146.76, 142.71, 142.63, 131.20,

130.70, 129.78, 129.64, 129.45, 128.76, 128.73, 128.54, 128.40, 126.01, 124.51,

124.37, 102.30, 99.65, 89.68, 77.01, 70.80, 63.47, 35.37, 30.73, 25.69, 25.21, 22.38,

19.12, 18.60, 13.67. **HRMS (ESI)** *m/z* Calcd for [C<sub>30</sub>H<sub>28</sub>Br<sub>2</sub>NaO<sub>3</sub>, M + Na]<sup>+</sup>: 617.0405,

Found: 617.0428. **HPLC analysis:** Chiralcel IA-H (Hexane/*i*-PrOH) = 90:10), flow

rate = 1.0 mL/min, wave length = 254 nm, *t*<sub>R</sub> = 4.783 min (major), *t*<sub>R</sub> = 5.333 (minor).

**Optical Rotation:** [ $\alpha$ ]<sub>D</sub><sup>20</sup> = 122° (*c* = 1.0, CH<sub>3</sub>OH); **Physical properties:** yellow foam;

**Yield:** (SiO<sub>2</sub>, PE:EA= 10:1) 75%, 44.6 mg.

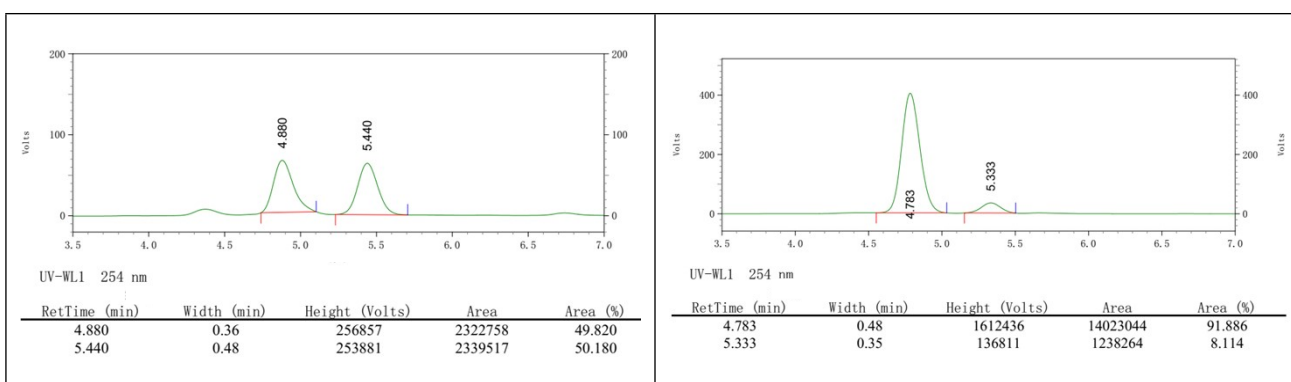

**(R)-1-bromo-1-((S)-4-bromo-1-(cyclohexylmethoxy)-1-(hex-1-yn-1-yl)-1H-isochromen-3-yl)naphthalen-2(1H)-one (2e)**

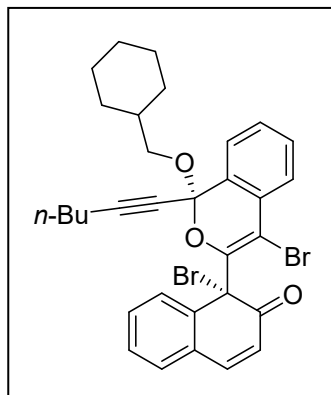

**<sup>1</sup>H NMR** (400 MHz, Toluene-*d*<sub>8</sub>): δ 7.91 (d, *J* = 7.5 Hz, 1H), 7.41 (d, *J* = 7.8 Hz, 1H), 7.33 (d, *J* = 7.7 Hz, 1H), 7.13 (d, *J* = 7.5 Hz, 1H), 7.04 (d, *J* = 7.7 Hz, 1H), 6.83 (t, *J* = 7.4 Hz, 1H), 6.80 – 6.71 (m, 3H), 6.21 (d, *J* = 10.0 Hz, 1H), 4.38 (dd, *J* = 8.9, 5.2 Hz, 1H), 4.27 – 4.20 (m, 1H), 2.12 (t, *J* = 6.9 Hz, 2H), 2.02 (d, *J* = 11.5 Hz, 1H), 1.93 (d, *J* = 8.7 Hz, 2H), 1.67 (t, *J* = 12.1 Hz, 2H), 1.58 (d, *J* = 10.1 Hz, 1H), 1.37 (m, 4H), 1.16 (m, 5H), 0.80 (t, *J* = 7.0 Hz, 3H). **<sup>13</sup>C NMR** (100 MHz, Toluene-*d*<sub>8</sub>): δ 188.77, 146.82, 142.76, 142.56, 131.33, 130.68, 129.75, 129.69, 129.41, 128.75, 128.74, 128.56, 128.39, 125.97, 125.38, 125.13, 124.89, 124.52, 124.39, 102.25, 99.69, 89.59, 77.08, 72.22, 63.46, 38.12, 30.87, 30.74, 30.38, 27.13, 26.46, 26.31, 22.37, 18.61, 13.67. **HRMS (ESI)** *m/z* Calcd for [C<sub>32</sub>H<sub>32</sub>Br<sub>2</sub>NaO<sub>3</sub>, M + Na]<sup>+</sup>: 645.0718, Found: 645.0695. **HPLC analysis:** Chiralcel IA-H (Hexane/*i*-PrOH) = 90:10), flow rate = 1.0 mL/min, wave length = 254 nm, *t*<sub>R</sub> = 4.670 min (major), *t*<sub>R</sub> = 5.110 (minor). **Optical Rotation:** [α]<sub>D</sub><sup>20</sup> = 112° (*c* = 1.0, CH<sub>3</sub>OH); **Physical properties:** yellow foam; **Yield:** (SiO<sub>2</sub>, PE:EA= 10:1) 75% 46.5 mg.

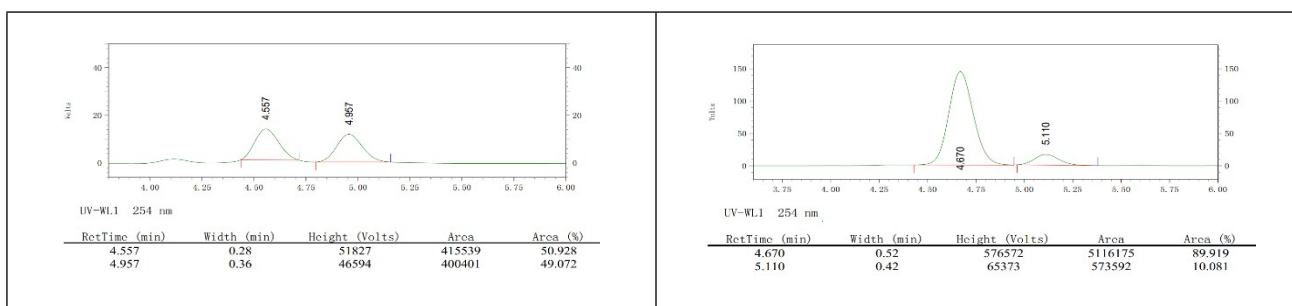

**(R)-1-((S)-1-(benzyloxy)-4-bromo-1-(hex-1-yn-1-yl)-1H-isochromen-3-yl)-1-**

**bromonaphthalen-2(1H)-one (2f)**

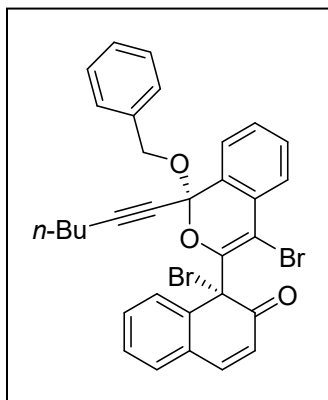

**<sup>1</sup>H NMR** (400 MHz, (CD<sub>3</sub>)<sub>2</sub>CO): δ 7.80 (dd, *J* = 6.1, 2.7 Hz, 1H), 7.77 (d, *J* = 10.0 Hz, 1H), 7.61 (dd, *J* = 6.2, 3.0 Hz, 1H), 7.53 (d, *J* = 7.2 Hz, 2H), 7.50 – 7.40 (m, 6H), 7.34 (t, *J* = 7.3 Hz, 2H), 7.31 – 7.25 (m, 1H), 6.48 (d, *J* = 10.0 Hz, 1H), 5.24 (d, *J* = 10.7 Hz, 1H), 5.14 (d, *J* = 10.7 Hz, 1H), 2.56 (t, *J* = 7.0 Hz, 2H), 1.69 (p, *J* = 6.9 Hz, 2H), 1.56 (dq, *J* = 14.2, 7.1 Hz,

2H), 0.98 (t, *J* = 7.3 Hz, 3H). **<sup>13</sup>C NMR** (100 MHz, (CD<sub>3</sub>)<sub>2</sub>CO): δ 190.03, 146.90, 144.41, 142.76, 138.47, 131.79, 130.94, 130.80, 130.70, 130.15, 129.60, 129.57, 129.51, 129.15, 128.94, 128.88, 128.46, 126.49, 124.70, 124.46, 102.37, 99.67, 91.35, 76.25, 69.00, 63.59, 31.03, 22.66, 18.71, 13.87. **HRMS (ESI)** *m/z* Calcd for [C<sub>32</sub>H<sub>26</sub>Br<sub>2</sub>NaO<sub>3</sub>, M+ Na]<sup>+</sup>: 639.0249, Found: 639.0149. **HPLC analysis:** Chiralcel IA-H (Hexane/*i*-PrOH) = 90:10, flow rate = 1.0 mL/min, wave length = 254 nm, *t<sub>R</sub>* = 5.368 min (minor), *t<sub>R</sub>* = 6.212 min (major). **Optical Rotation:** [ $\alpha$ ]<sub>D</sub><sup>20</sup> = 144° (*c* = 1.0, CH<sub>3</sub>OH);

**Physical properties:** yellow foam; **Yield:** (SiO<sub>2</sub>, PE:EA= 10:1) 76%, 46.8mg.

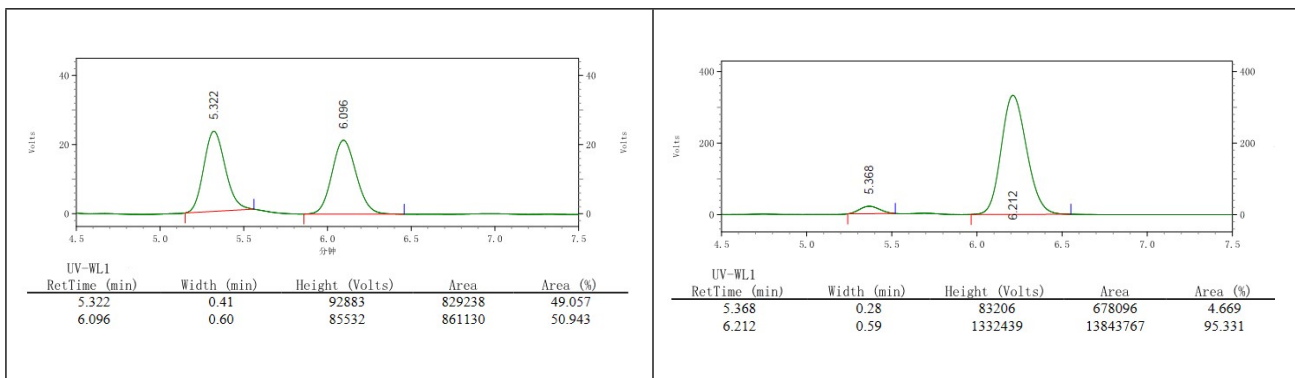

**(R)-1-bromo-1-((S)-4-bromo-1-(hex-1-yn-1-yl)-1-(thiophen-2-ylmethoxy)-1H-isochromen-3-yl)naphthalen-2(1H)-one (2g)**

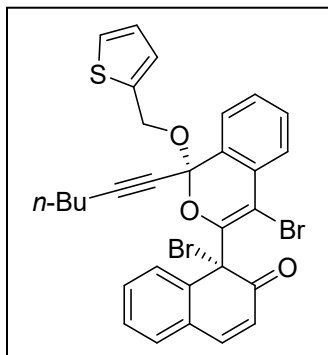

**<sup>1</sup>H NMR** (400 MHz, Toluene-*d*<sub>8</sub>): δ 7.89 – 7.85 (m, 1H), 7.36 – 7.31 (m, 2H), 7.27 (d, *J* = 7.6 Hz, 1H), 7.06 – 7.02 (m, 1H), 7.00 – 6.95 (m, 1H), 6.86 – 6.82 (m, 1H), 6.82 – 6.78 (m, 1H), 6.76 (d, *J* = 3.3 Hz, 1H), 6.75 – 6.68 (m, 3H), 6.23 (d, *J* = 10.0 Hz, 1H), 5.71 (s, 2H), 2.11 (t, *J* = 6.9 Hz, 2H), 1.40 (m, 2H),

1.35 – 1.28 (m, 2H), 0.79 (t, *J* = 7.1 Hz, 3H). **<sup>13</sup>C NMR** (100 MHz, Toluene-*d*<sub>8</sub>): δ 189.19, 146.40, 142.94, 142.61, 140.41, 130.78, 130.69, 129.94, 129.56, 129.52, 128.80, 128.73, 128.57, 128.49, 128.30, 126.88, 126.12, 125.97, 124.53, 124.23, 102.80, 99.32, 90.29, 76.41, 63.48, 63.30, 30.64, 22.41, 18.61, 13.72. **HRMS (ESI)**

*m/z* Calcd for [C<sub>30</sub>H<sub>24</sub>Br<sub>2</sub>O<sub>3</sub>NaS, M+ Na]<sup>+</sup>: 644.9813, Found: 644.9780. **HPLC**

**analysis:** Chiralcel IA-H (Hexane/*i*-PrOH) = 95:5, flow rate = 1.0 mL/min, wave length

= 254 nm, *t*<sub>R</sub> = 7.202 min (minor), *t*<sub>R</sub> = 10.800 min (major). **Optical Rotation:** [ $\alpha$ ]<sub>D</sub><sup>20</sup> =

99° (*c* = 1.0, CH<sub>3</sub>OH); **Physical properties:** yellow foam; **Yield:** (SiO<sub>2</sub>, PE:EA= 10:1)

71%, 44.1 mg.

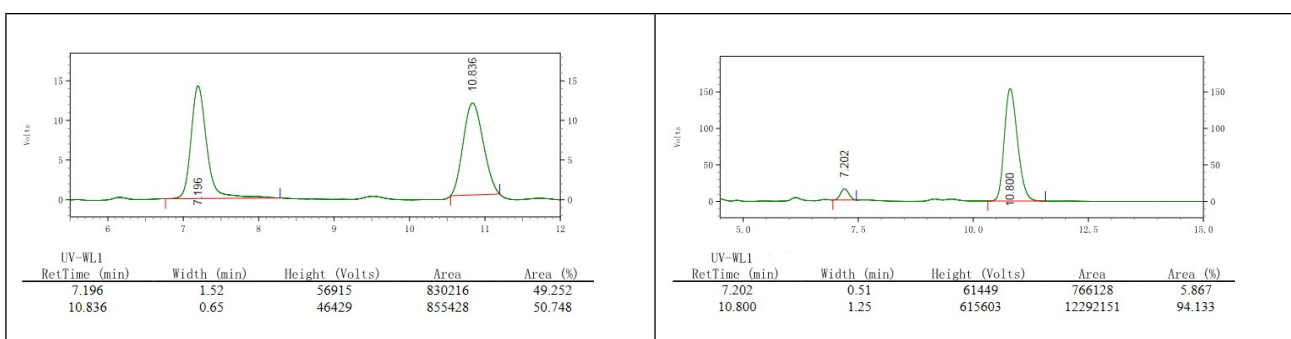



**(R)-1-bromo-1-((S)-4-bromo-1-(2-fluoroethoxy)-1-(hex-1-yn-1-yl)-1H-**

**isochromen-3-yl)naphthalen-2(1H)-one (2h)**

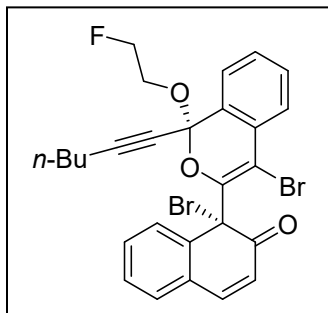

**<sup>1</sup>H NMR** (400 MHz, CDCl<sub>3</sub>): δ 7.78 – 7.72 (m, 1H), 7.49 – 7.42 (m, 2H), 7.42 – 7.23 (m, 6H), 6.42 (d, *J* = 10.0 Hz, 1H), 4.92 – 4.58 (m, 2H), 4.48 – 4.21 (m, 2H), 2.45 (t, *J* = 7.1 Hz, 2H), 1.67 (p, *J* = 7.1 Hz, 2H), 1.52 (dq, *J* = 14.4, 7.2 Hz, 2H), 0.98 (t, *J* = 7.3 Hz, 3H). **<sup>13</sup>C NMR** (100 MHz, (CD<sub>3</sub>)<sub>2</sub>CO): δ 190.18,

146.70, 144.55, 142.71, 131.83, 130.91, 130.78, 130.74, 130.17, 129.60, 129.54, 129.13, 128.89, 126.49, 124.75, 124.38, 102.60, 99.46, 91.46, 83.00 (d, *J* = 166.0 Hz),

75.58, 65.74 (d, *J* = 20.0 Hz), 63.43, 31.00, 22.64, 18.66, 13.85. **HRMS (ESI)** *m/z*

Calcd for [C<sub>27</sub>H<sub>23</sub>Br<sub>2</sub>NaFO<sub>3</sub>, M+ Na]<sup>+</sup>: 594.9998, Found: 594.9908. **HPLC analysis:**

Chiralcel IC-H (Hexane/*i*-PrOH) =95:5, flow rate = 1.0 mL/min, wave length = 254

nm, *t*<sub>R</sub> =13.610 min (major), *t*<sub>R</sub> = 15.453 min (minor). **Optical Rotation:** [ $\alpha$ ]<sub>D</sub><sup>20</sup> = 99°

(*c* = 1.0, CH<sub>3</sub>OH); **Physical properties:** yellow foam; **Yield:** (SiO<sub>2</sub>, PE:EA= 10:1)

74%, 42.3 mg.

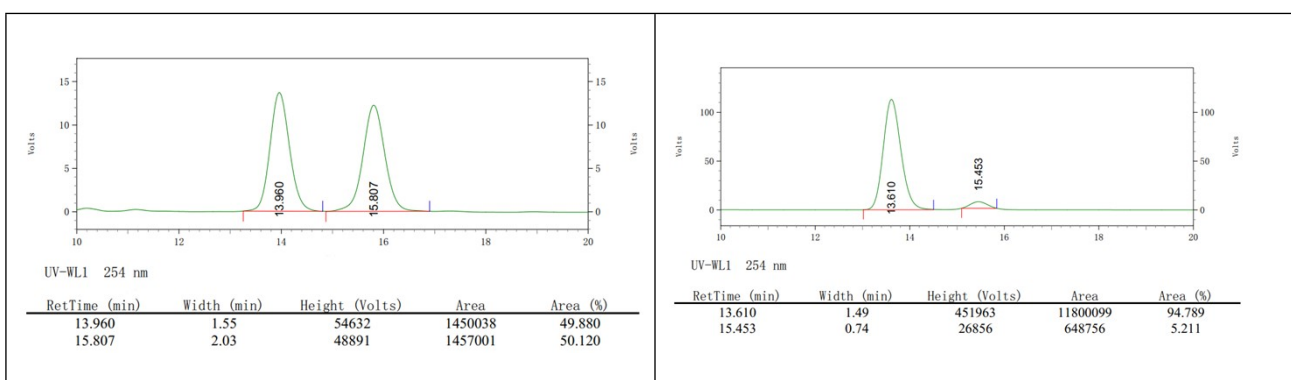

**(R)-1-bromo-1-((S)-4-bromo-1-(3-bromopropoxy)-1-(hex-1-yn-1-yl)-1H-**

**isochromen-3-yl)naphthalen-2(1H)-one (2i)**

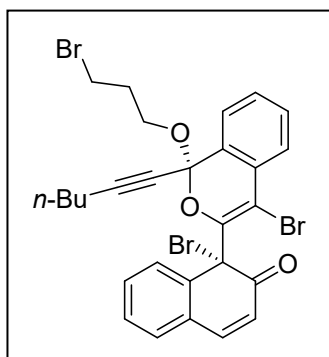

**<sup>1</sup>H NMR** (400 MHz, (CD<sub>3</sub>)<sub>2</sub>CO) δ 7.79 – 7.74 (m, 1H), 7.70 (d, *J* = 10.1 Hz, 1H), 7.55 (m, 1H), 7.49 – 7.36 (m, 6H), 6.43 (d, *J* = 10.0 Hz, 1H), 4.30 (td, *J* = 8.7, 7.9, 5.1 Hz, 1H), 4.23 (dt, *J* = 9.6, 5.5 Hz, 1H), 3.55 (tt, *J* = 9.9, 5.4 Hz, 2H), 2.50 (t, *J* = 7.0 Hz, 2H), 2.35 – 2.26 (m, 1H), 2.25 – 2.15 (m, 1H), 1.66

(dt, *J* = 14.4, 6.9 Hz, 2H), 1.53 (dq, *J* = 14.1, 7.1 Hz, 2H), 0.95 (t, *J* = 7.3 Hz, 3H). **<sup>13</sup>C**

**NMR** (100 MHz, (CD<sub>3</sub>)<sub>2</sub>CO): δ 189.90, 146.83, 144.31, 142.66, 131.70, 130.94, 130.74, 130.63, 130.07, 129.48, 129.43, 129.04, 128.79, 126.35, 124.65, 124.38, 102.25, 99.46, 91.24, 75.96, 64.44, 63.44, 33.35, 31.48, 30.97, 22.63, 18.71, 13.89.

**HRMS (ESI)** *m/z* Calcd for [C<sub>28</sub>H<sub>25</sub>Br<sub>3</sub>NaO<sub>3</sub>, M+ Na]<sup>+</sup>: 668.9354, Found: 668.9274.

**HPLC analysis:** Chiralcel IA-H (Hexane/*i*-PrOH) = 98:2, flow rate = 1.0 mL/min, wave length = 254 nm, *t<sub>R</sub>* = 7.870 min (major), *t<sub>R</sub>* = 9.170 min (minor). **Optical**

**Rotation:** [α]<sub>D</sub><sup>20</sup> = 102° (c = 1.0, CH<sub>3</sub>OH); **Physical properties:** yellow foam; **Yield:** (SiO<sub>2</sub>, PE:EA= 10:1) 77 %, 49.7 mg.

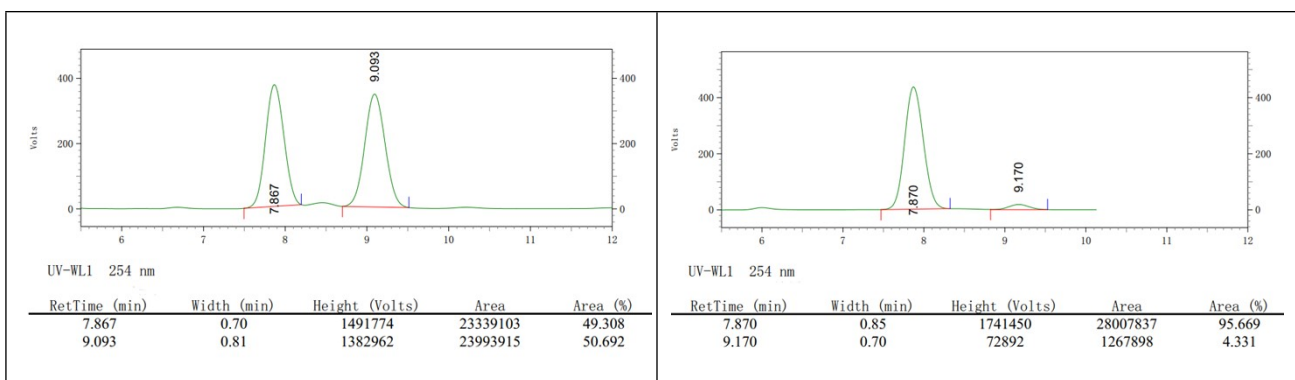

**(R)-1-bromo-1-((S)-4-bromo-1-(hex-1-yn-1-yl)-1-(2,2,2-trifluoroethoxy)-1H-  
isochromen-3-yl)naphthalen-2(1H)-one (2j)**

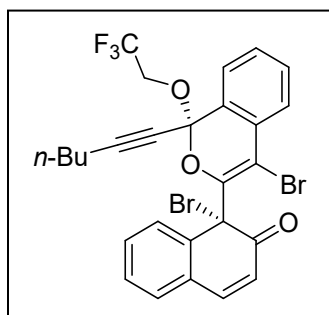

**<sup>1</sup>H NMR** (400 MHz, CDCl<sub>3</sub>): δ 7.79 – 7.74 (m, 1H), 7.47 (d, *J* = 10.0 Hz, 1H), 7.42 (m, 4H), 7.38 – 7.28 (m, 3H), 6.44 (d, *J* = 10.0 Hz, 1H), 4.69 – 4.58 (m, 1H), 4.45 – 4.34 (m, 1H), 2.46 (t, *J* = 7.1 Hz, 2H), 1.67 (p, *J* = 7.1 Hz, 2H), 1.52 (dq, *J* = 14.3, 7.2 Hz, 2H), 0.98 (t, *J* = 7.3 Hz, 3H). **<sup>13</sup>C NMR** (100 MHz, CDCl<sub>3</sub>):

δ 189.75, 144.80, 143.43, 141.69, 130.85, 130.19, 129.54, 129.11, 128.78, 128.53, 128.37, 127.92, 125.89, 124.41, 123.84 (q, *J* = 276.0 Hz), 123.76, 102.72, 98.70, 91.01, 74.01, 63.43 (q, *J* = 35.0 Hz), 62.16, 30.12, 22.00, 18.40, 13.54. **HRMS (ESI)** *m/z* Calcd for [C<sub>27</sub>H<sub>21</sub>Br<sub>2</sub>F<sub>3</sub>NaO<sub>3</sub>, M+ Na]<sup>+</sup>: 630.9810, Found: 630.9710. **HPLC analysis:** Chiralcel IA-H (Hexane/*i*-PrOH) = 98:2, flow rate = 1.0 mL/min, wave length = 254 nm, *t<sub>R</sub>* = 5.736 min (major), *t<sub>R</sub>* = 6.352 min (minor). **Optical Rotation:** [α]<sub>D</sub><sup>20</sup> = 160° (c = 1.0, CH<sub>3</sub>OH); **Physical properties:** yellow foam; **Yield:** (SiO<sub>2</sub>, PE:EA= 10:1) 72%, 43.8 mg.

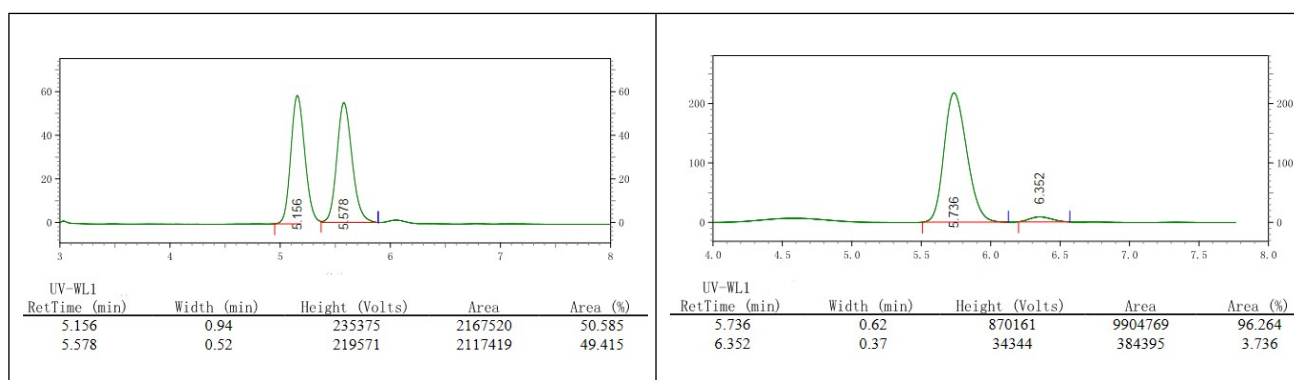

**(R)-1-bromo-1-((S)-4-bromo-1-(cinnamyloxy)-1-(hex-1-yn-1-yl)-1H-isochromen-3-yl)naphthalen-2(1H)-one (2k)**

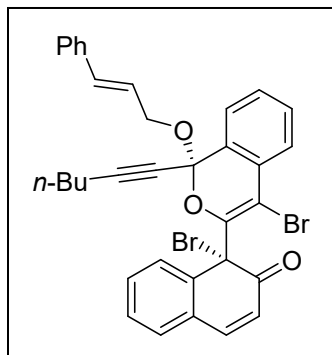

**<sup>1</sup>H NMR** (400 MHz, Toluene-*d*<sub>8</sub>): δ 7.94 (d, *J* = 7.6 Hz, 1H), 7.35 (t, *J* = 8.2 Hz, 2H), 7.22 (d, *J* = 7.3 Hz, 2H), 7.12 (d, *J* = 7.5 Hz, 1H), 7.04 (t, *J* = 7.4 Hz, 3H), 6.97 (s, 1H), 6.80 (t, *J* = 7.3 Hz, 1H), 6.72 (td, *J* = 10.3, 9.4, 4.0 Hz, 5H), 6.23 (d, *J* = 10.0 Hz, 1H), 5.26 (dd, *J* = 11.6, 4.8 Hz, 1H), 5.07 (dd, *J* = 11.5, 5.9 Hz, 1H), 2.13 (t, *J* = 7.0 Hz, 2H), 1.45 – 1.36 (m, 2H), 1.36 – 1.29 (m, 2H), 0.79 (t, *J* = 7.2 Hz, 3H). **<sup>13</sup>C NMR** (100 MHz, Toluene-*d*<sub>8</sub>): δ 189.18, 146.66, 142.88, 142.65, 137.60, 133.33, 131.04, 130.77, 129.94, 129.69, 129.51, 128.80, 128.74, 128.60, 128.52, 128.51, 127.53, 127.06, 126.38, 126.04, 124.60, 124.28, 102.71, 99.40, 90.00, 76.44, 67.64, 63.39, 30.72, 22.43, 18.64, 13.71. **HRMS (ESI)** *m/z* Calcd for [C<sub>34</sub>H<sub>28</sub>Br<sub>2</sub>NaO<sub>3</sub>, M+ Na]<sup>+</sup>: 665.0405, Found: 665.0385. **HPLC analysis:** Chiralcel IC-H (Hexane/*i*-PrOH) = 95:5, wave length = 254 nm, *t*<sub>R</sub> = 10.400 min (major), *t*<sub>R</sub> = 12.807 min (minor). **Optical Rotation:**  $[\alpha]_D^{20} = 95^\circ$  (c = 1.0, CH<sub>3</sub>OH); **Physical properties:** yellow foam; **Yield:** (SiO<sub>2</sub>, PE:EA= 10:1) 60%, 38.5 mg.

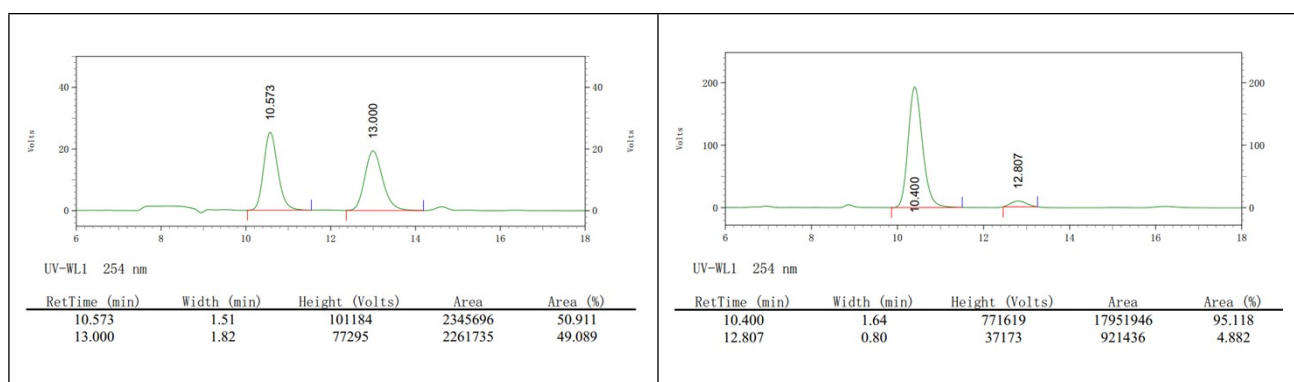

**(R)-1-bromo-1-((S)-4-bromo-1-(hex-1-yn-1-yl)-1-((3-phenylprop-2-yn-1-yl)oxy)-1H-isochromen-3-yl)naphthalen-2(1H)-one (2l)**

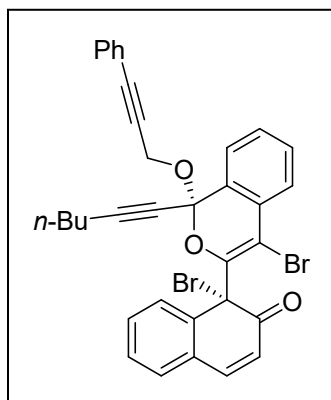

**<sup>1</sup>H NMR** (400 MHz, Toluene-*d*<sub>8</sub>): δ 7.92 (d, *J* = 7.4 Hz, 1H), 7.37 – 7.31 (m, 4H), 7.13 (d, *J* = 6.9 Hz, 1H), 7.09 – 7.04 (m, 1H), 6.99 – 6.92 (m, 3H), 6.90 – 6.81 (m, 3H), 6.77 (t, *J* = 7.4 Hz, 1H), 6.26 (d, *J* = 10.0 Hz, 1H), 5.54 (d, *J* = 15.2 Hz, 1H), 5.41 (d, *J* = 15.2 Hz, 1H), 2.13 (t, *J* = 6.9 Hz, 2H), 1.42 (dt, *J* = 14.3, 7.0 Hz, 2H), 1.33 (dt, *J* = 14.1, 7.0 Hz, 2H), 0.80 (t, *J* =

7.1 Hz, 3H). **<sup>13</sup>C NMR** (100 MHz, Toluene-*d*<sub>8</sub>): δ 189.07, 146.25, 142.96, 142.54, 132.13, 130.75, 130.49, 130.10, 129.62, 129.59, 128.69, 128.55, 128.30, 126.20, 124.59, 124.24, 123.81, 102.94, 99.21, 90.73, 86.57, 86.36, 75.83, 63.19, 55.63, 30.60, 22.41, 18.63, 13.68. **HRMS (ESI)** *m/z* Calcd for [C<sub>34</sub>H<sub>26</sub>Br<sub>2</sub>NaO<sub>3</sub>, M+ Na]<sup>+</sup>: 663.0249, Found: 663.0149. **HPLC analysis:** Chiralcel IA-H (Hexane/*i*-PrOH) = 98:2, flow rate = 1.0 mL/min, wave length = 254 nm, *t*<sub>R</sub> = 12.778 min (minor), *t*<sub>R</sub> = 14.712 min (major).

**Optical Rotation:** [ $\alpha$ ]<sub>D</sub><sup>20</sup> = 105° (*c* = 1.0, CH<sub>3</sub>OH); **Physical properties:** yellow foam;

**Yield:** (SiO<sub>2</sub>, PE:EA= 10:1) 60%, 38.4 mg.

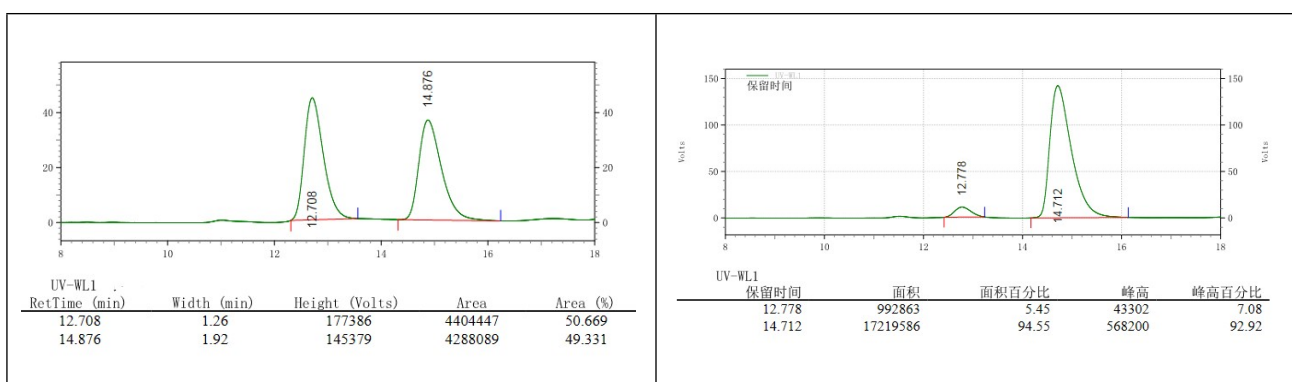

**(R)-1-bromo-1-((S)-4-bromo-1-(hex-1-yn-1-yl)-1-propoxy-1H-isochromen-3-yl)naphthalen-2(1H)-one (2m)**

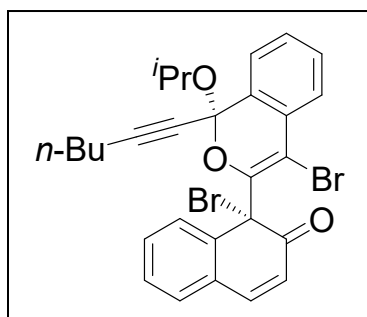

$^1\text{H NMR}$  (400 MHz, Toluene- $d_8$ )  $\delta$  7.80 (d,  $J = 7.7$  Hz, 1H), 7.58 (d,  $J = 7.6$  Hz, 1H), 7.29 (d,  $J = 7.8$  Hz, 1H), 7.06 (d,  $J = 7.6$  Hz, 1H), 6.99 – 6.95 (m, 1H), 6.84 (t,  $J = 7.8$  Hz, 1H), 6.80 – 6.72 (m, 3H), 6.21 (d,  $J = 10.0$  Hz, 1H), 5.09 (p,  $J = 6.2$  Hz, 1H), 2.05 (t,  $J = 7.0$  Hz, 2H), 1.60 (d,  $J = 6.2$  Hz, 3H),

1.46 (d,  $J = 6.1$  Hz, 3H), 1.36 (m, 2H), 1.31 – 1.23 (m, 2H), 0.77 (t,  $J = 7.2$  Hz, 3H).

$^{13}\text{C NMR}$  (100 MHz, Toluene- $d_8$ )  $\delta$  188.31, 147.05, 142.64, 142.39, 131.25, 130.54, 129.57, 129.42, 129.24, 128.53, 128.31, 125.93, 124.44, 101.45, 98.96, 89.50, 78.13, 70.08, 63.67, 30.55, 23.96, 23.84, 22.32, 18.55, 13.62. **HRMS (ESI)**  $m/z$  Calcd for  $[\text{C}_{28}\text{H}_{26}\text{Br}_2\text{NaO}_3, \text{M} + \text{Na}]^+$ : 591.0249, Found: 591.0121. **HPLC analysis:** Chiralcel IC-H (Hexane/*i*-PrOH) =95:5, flow rate = 1.0 mL/min, wave length = 254 nm,  $t_R = 10.223$

min (major),  $t_R = 11.257$  min (minor). **Optical Rotation:**  $[\alpha]_D^{20} = 170^\circ$  ( $c = 1.0$ ,  $\text{CH}_3\text{OH}$ ); **Physical properties:** yellow foam; **Yield:** ( $\text{SiO}_2$ , PE:EA= 10:1) 78%, 44.3

mg.

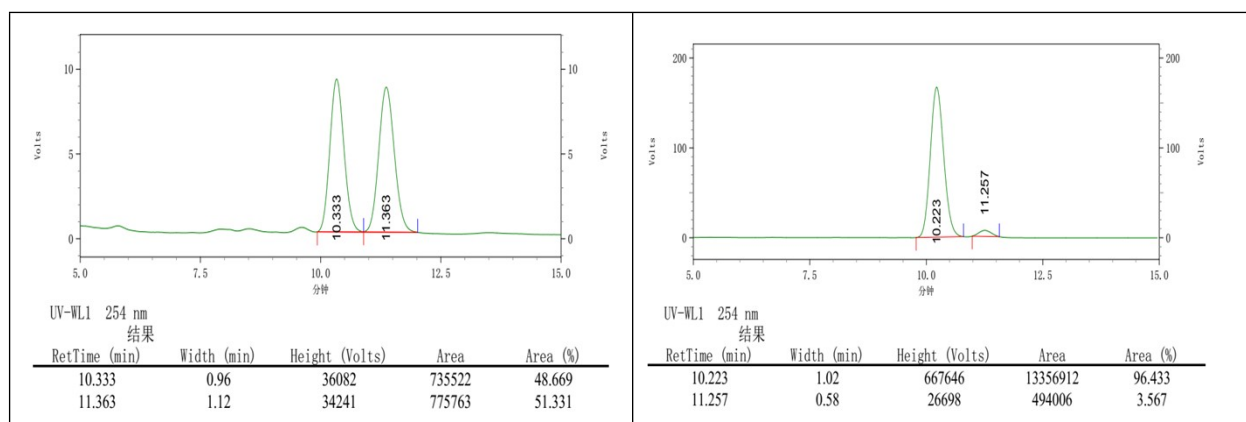

**(R)-1-bromo-1-((S)-4-bromo-1-(pent-1-yn-1-yl)-1-(2,2,2-trifluoroethoxy)-1H-isochromen-3-yl)naphthalen-2(1H)-one (2n)**

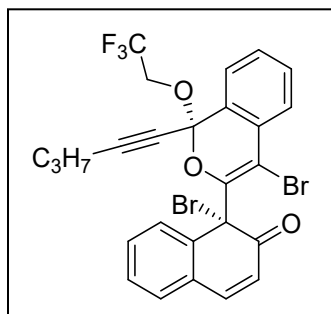

**<sup>1</sup>H NMR** (400 MHz, Toluene-*d*<sub>8</sub>): δ 7.85 – 7.81 (m, 1H), 7.24 (d, *J* = 7.6 Hz, 1H), 7.18 (d, *J* = 7.8 Hz, 1H), 7.07 – 7.02 (m, 1H), 7.02 – 6.97 (m, 1H), 6.83 (t, *J* = 7.3 Hz, 1H), 6.78 (d, *J* = 9.4 Hz, 2H), 6.72 (t, *J* = 7.5 Hz, 1H), 6.16 (d, *J* = 10.0 Hz, 1H), 4.97 (dt, *J* = 11.8, 8.8 Hz, 1H), 4.92 – 4.82 (m, 1H), 2.01 (t, *J* = 7.0 Hz, 2H), 1.37 (h, *J* = 7.2 Hz, 2H), 0.87 (t, *J* = 7.4 Hz, 3H). **<sup>13</sup>C NMR** (100 MHz, Toluene-*d*<sub>8</sub>): δ 189.32, 145.69, 143.25, 142.24, 130.86, 130.49, 129.67, 129.46, 129.31, 128.95, 128.92, 128.59, 128.45, 126.21, 124.84 (q, *J* = 276.0 Hz), 124.73, 124.01, 103.27, 99.48, 91.10, 75.03, 64.25 (q, *J* = 35.0 Hz), 62.88, 21.90, 20.56, 13.48. **HRMS (ESI)** *m/z* Calcd for [C<sub>26</sub>H<sub>19</sub>Br<sub>2</sub>F<sub>3</sub>NaO<sub>3</sub>, M+ Na]<sup>+</sup>: 616.9653, Found: 616.9583. **HPLC analysis:** Chiralcel IA-H (Hexane/*i*-PrOH) = 95:2, flow rate = 1.0 mL/min, wave length = 254 nm, *t*<sub>R</sub> = 5.073 min (major), *t*<sub>R</sub> = 5.657 min (minor). **Optical Rotation:** [ $\alpha$ ]<sub>D</sub><sup>20</sup> = 134° (*c* = 1.0, CH<sub>3</sub>OH); **Physical properties:** yellow foam; **Yield:** (SiO<sub>2</sub>, PE:EA= 10:1) 75%, 44.6 mg.

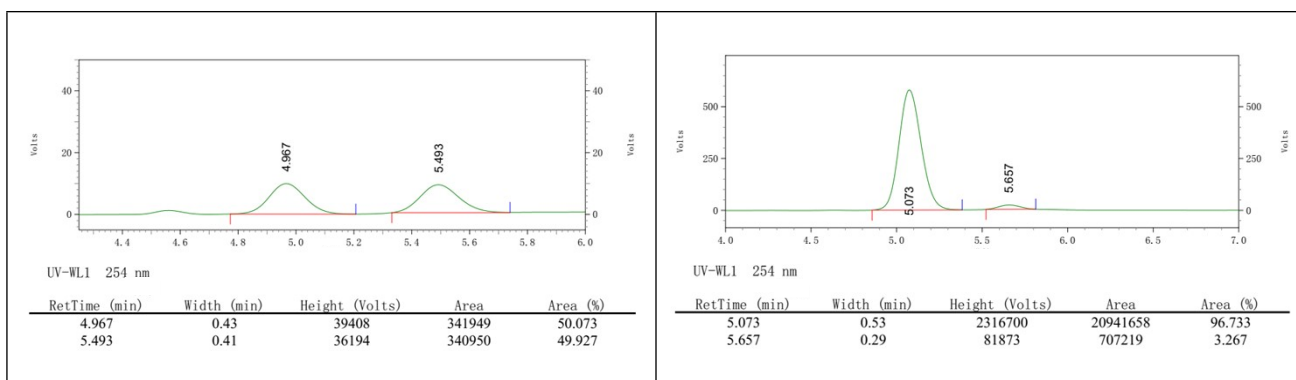

**(R)-1-bromo-1-((S)-4-bromo-1-(hept-1-yn-1-yl)-1-(2,2,2-trifluoroethoxy)-1H-isochromen-3-yl)naphthalen-2(1H)-one (2o)**

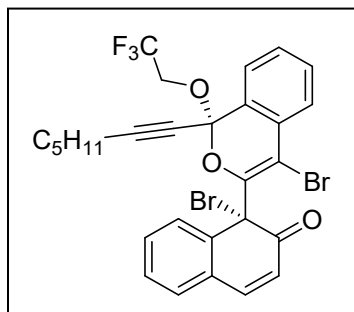

$^1\text{H NMR}$  (400 MHz, Toluene- $d_8$ ) :  $\delta$  7.88 – 7.82 (m, 1H), 7.27 – 7.23 (m, 1H), 7.20 (d,  $J = 7.7$  Hz, 1H), 7.03 (td,  $J = 7.5$ , 1.3 Hz, 1H), 6.98 (dd,  $J = 7.7$ , 1.5 Hz, 1H), 6.80 (td,  $J = 7.5$ , 1.2 Hz, 1H), 6.74 – 6.67 (m, 3H), 6.15 (d,  $J = 10.0$  Hz, 1H), 4.99 (dq,  $J = 11.9$ , 8.8 Hz, 1H), 4.93 – 4.84 (dq,  $J = 11.9$ , 8.8 Hz, 1H), 2.08 – 2.04 (m, 2H), 1.39 (dt,  $J = 14.4$ , 6.7 Hz, 2H), 1.25 (m, 2H), 1.16 (m, 2H), 0.82 (t,  $J = 7.2$  Hz, 3H).  $^{13}\text{C NMR}$  (100 MHz,  $\text{CDCl}_3$ )  $\delta$  189.74, 144.81, 143.41, 141.72, 130.85, 130.19, 129.54, 129.11, 128.82, 128.77, 128.56, 128.40, 127.94, 125.91, 123.84 (q,  $J = 276.0$  Hz), 124.42, 123.80, 102.72, 98.71, 91.07, 74.07, 63.44 (q,  $J = 35.0$  Hz), 62.16, 31.05, 27.76, 22.13, 18.68, 13.96. **HRMS (ESI)**  $m/z$  Calcd for  $[\text{C}_{28}\text{H}_{23}\text{Br}_2\text{F}_3\text{NaO}_3, \text{M} + \text{Na}]^+$ : 644.9966, Found: 644.9876. **HPLC analysis:** Chiralcel IA-H (Hexane/*i*-PrOH) = 95:5, flow rate = 1.0 mL/min, wave length = 254 nm,  $t_R$  = 4.687 min (major),  $t_R$  = 5.220 min (minor). **Optical Rotation:**  $[\alpha]_D^{20} = 211^\circ$  ( $c = 1.0$ ,  $\text{CHCl}_3$ ); **Physical properties:** yellow foam; **Yield:** ( $\text{SiO}_2$ , PE:EA= 10:1) 83%, 51.6 mg.

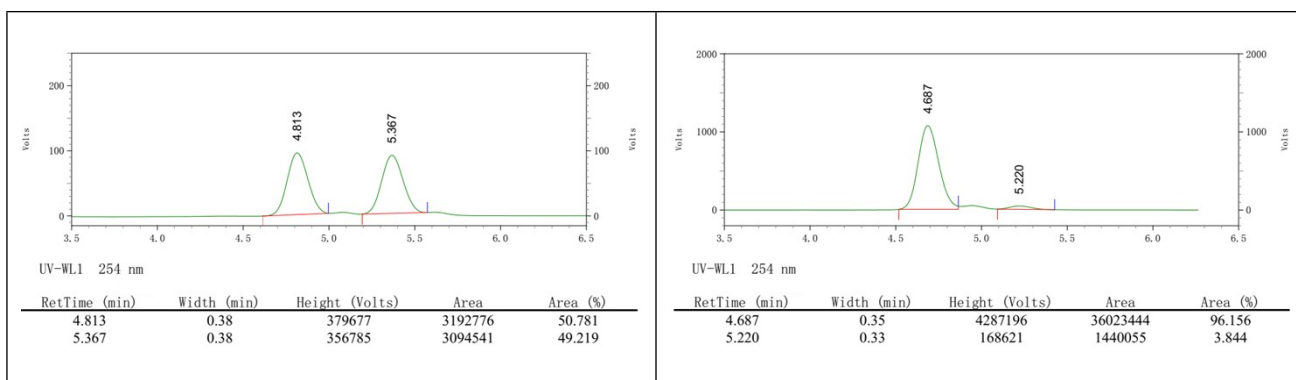



**(R)-1-bromo-1-((S)-4-bromo-1-(dec-1-yn-1-yl)-1-(2,2,2-trifluoroethoxy)-1H-isochromen-3-yl)naphthalen-2(1H)-one (2p)**

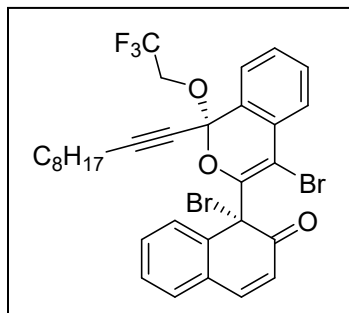

**<sup>1</sup>H NMR** (400 MHz, Toluene-*d*<sub>8</sub>)  $\delta$ : 7.68 – 7.63 (m, 1H), 7.03 (d,  $J = 7.7$  Hz, 1H), 6.98 (d,  $J = 7.7$  Hz, 1H), 6.87 – 6.82 (m, 1H), 6.80 – 6.77 (m, 1H), 6.63 – 6.58 (m, 1H), 6.56 – 6.46 (m, 3H), 5.96 – 5.93 (d, 1H), 4.86 – 4.73 (m, 1H), 4.68 (dt,  $J = 11.8, 8.9$  Hz, 1H), 1.88 (t,  $J = 7.0$  Hz, 2H), 1.20 (dt,  $J = 14.2, 6.9$  Hz, 2H), 1.13 – 0.89 (m, 10H), 0.66 (t,  $J = 7.0$  Hz, 3H). **<sup>13</sup>C NMR** (100MHz, Toluene-*d*<sub>8</sub>):  $\delta$  189.31, 145.70, 143.21, 142.27, 130.85, 130.49, 129.64, 129.48, 129.34, 128.45, 126.24, 124.86 (q,  $J = 275.0$  Hz), 124.75, 124.02, 103.30, 99.51, 91.25, 74.95, 64.29 (q,  $J = 35.0$  Hz), 62.87, 32.14, 29.19, 29.13, 28.47, 23.03, 18.72, 14.33. **HRMS (ESI)**  $m/z$  Calcd for [C<sub>31</sub>H<sub>29</sub>Br<sub>2</sub>F<sub>3</sub>NaO<sub>3</sub>, M + Na]<sup>+</sup>: 687.0436, Found: 687.0386. **HPLC analysis:** Chiralcel IA-H (Hexane/*i*-PrOH) = 95:5, flow rate = 1.0 mL/min, wave length = 254 nm,  $t_R = 4.477$  min (major),  $t_R = 4.897$  min (minor). **Optical Rotation:**  $[\alpha]_D^{20} = 200^\circ$  ( $c = 1.0$ , CH<sub>3</sub>OH); **Physical properties:** yellow foam; **Yield:** (SiO<sub>2</sub>, PE:EA= 10:1) 87%, 57.7 mg.

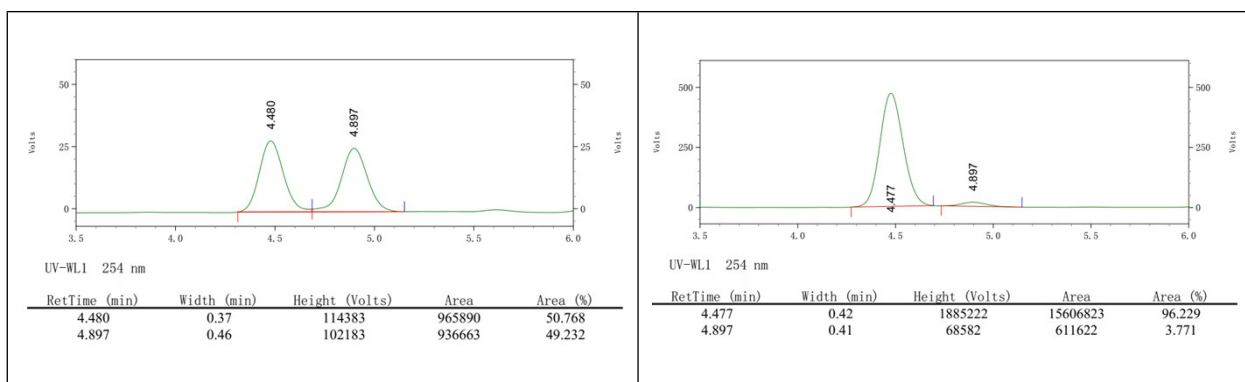

**(R)-1-bromo-1-((S)-4-bromo-1-(3,3-dimethylbut-1-yn-1-yl)-1-(2,2,2-trifluoroethoxy)-1H-isochromen-3-yl)naphthalen-2(1H)-one (2q)**

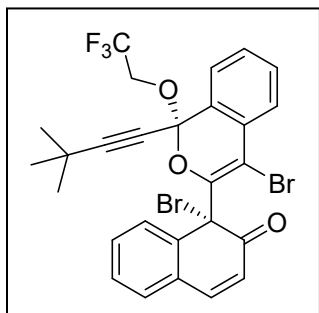

$^1\text{H NMR}$  (400 MHz, Toluene- $d_8$ )  $\delta$  7.88 – 7.83 (m, 1H), 7.24 (d,  $J = 7.6$  Hz, 1H), 7.12 (d,  $J = 7.8$  Hz, 1H), 7.07 – 7.02 (m, 1H), 7.00 – 6.96 (m, 1H), 6.79 (t,  $J = 7.2$  Hz, 1H), 6.74 – 6.64 (m, 3H), 6.14 (d,  $J = 10.0$  Hz, 1H), 4.99 (dq,  $J = 12.0, 8.9$  Hz, 1H), 4.93 – 4.82 (m, 1H), 1.19 (s, 9H).  $^{13}\text{C NMR}$  (100 MHz,  $\text{CDCl}_3$ ):

$\delta$  189.78, 144.84, 143.40, 141.76, 130.85, 130.17, 129.53, 129.10, 128.88, 128.78, 128.59, 128.43, 127.94, 125.87, 124.42, 123.81, 123.86 (q,  $J = 276.0$  Hz), 102.74, 98.72, 98.59, 72.67, 63.43 (q,  $J = 35.0$  Hz), 62.11, 30.47, 27.69. **HRMS (ESI)  $m/z$**  Calcd for  $[\text{C}_{27}\text{H}_{21}\text{Br}_2\text{F}_3\text{NaO}_3, \text{M}^+ \text{Na}]^+$ : 630.9810, Found: 630.9750. **HPLC analysis:** Chiralcel IA -H (Hexane/*i*-PrOH) = 95:5, flow rate = 1.0 mL/min, wave length = 254 nm,  $t_{\text{R}} = 4.427$  min (major),  $t_{\text{R}} = 4.793$  min (minor). **Optical Rotation:**  $[\alpha]_D^{20} = 166^\circ$  ( $c = 1.0, \text{CH}_3\text{OH}$ ); **Physical properties:** yellow foam; **Yield:** ( $\text{SiO}_2, \text{PE:EA} = 10:1$ ) 86%, 52.3 mg.

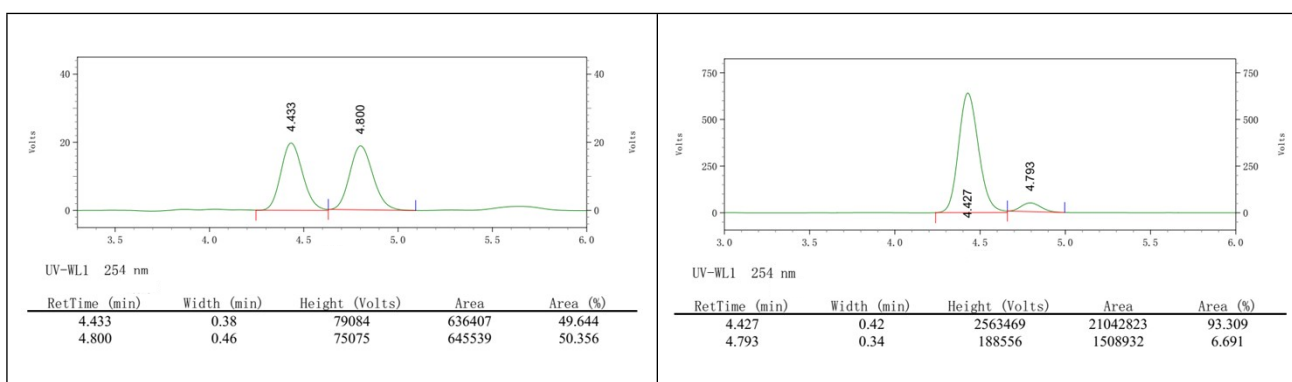

**(R)-1-bromo-1-((S)-4-bromo-1-(cyclopropylethynyl)-1-(2,2,2-trifluoroethoxy)-1H-isochromen-3-yl)naphthalen-2(1H)-one (2r)**

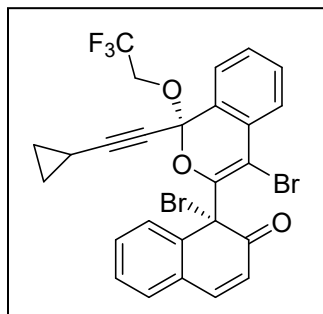

$^1\text{H NMR}$  (400 MHz, Toluene- $d_8$ ):  $\delta$  7.80 – 7.75 (m, 1H), 7.25 – 7.20 (m, 1H), 7.16 (d,  $J = 7.7$  Hz, 1H), 7.04 – 6.96 (m, 2H), 6.83 (t,  $J = 7.2$  Hz, 1H), 6.77 (d,  $J = 9.8$  Hz, 2H), 6.74 – 6.67 (m, 1H), 6.15 (d,  $J = 10.0$  Hz, 1H), 4.99 – 4.77 (m, 2H), 1.05 (m, 1H), 0.68 – 0.62 (m, 2H), 0.44 (dq,  $J = 6.3, 3.4$  Hz, 2H).  $^{13}\text{C NMR}$  (100 MHz, Toluene- $d_8$ ):  $\delta$  189.34, 145.67, 143.27, 142.18, 137.48, 130.87, 130.48, 129.67, 129.43, 129.25, 128.94, 128.56, 128.40, 124.81 (q,  $J = 276.0$  Hz), 124.70, 123.97, 103.27, 99.45, 94.14, 69.67, 64.17 (q,  $J = 36.0$  Hz), 62.81, 8.77, 8.68, -0.45. **HRMS (ESI)**  $m/z$  Calcd for  $[\text{C}_{26}\text{H}_{17}\text{Br}_2\text{F}_3\text{NaO}_3, \text{M} + \text{Na}]^+$ : 614.9497, Found: 614.9428. **HPLC analysis:** Chiralcel IA-H (Hexane/*i*-PrOH) = 85:15), flow rate = 1.0 mL/min, wave length = 254 nm,  $t_R = 6.150$  min (major),  $t_R = 8.397$  (minor). **Optical Rotation:**  $[\alpha]_D^{20} = 84^\circ$  ( $c = 1.0$ ,  $\text{CH}_3\text{OH}$ ); **Physical properties:** yellow foam; **Yield:** ( $\text{SiO}_2$ , PE:EA= 10:1) 72%, 42.6 mg.

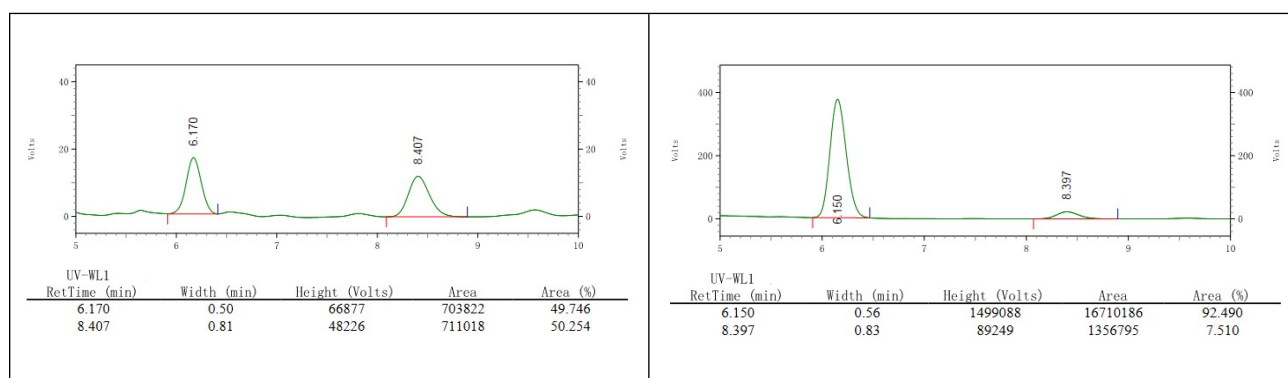

**(R)-1-bromo-1-((S)-4-bromo-1-(phenylethynyl)-1-(2,2,2-trifluoroethoxy)-1H-isochromen-3-yl)naphthalen-2(1H)-one (2s)**

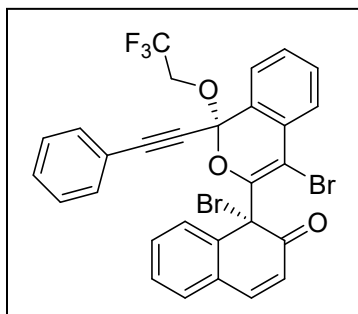

<sup>1</sup>H NMR (400 MHz, Toluene-*d*<sub>8</sub>): δ 7.88 – 7.84 (m, 1H), 7.44 – 7.38 (m, 2H), 7.29 – 7.20 (m, 2H), 7.05 – 6.98 (m, 3H), 6.96 (d, *J* = 7.7 Hz, 2H), 6.85 – 6.80 (m, 1H), 6.73 (dd, *J* = 15.5, 8.8 Hz, 3H), 6.17 (d, *J* = 10.0 Hz, 1H), 5.06 (dq, *J* = 11.9, 8.7 Hz, 1H). <sup>13</sup>C NMR (100 MHz,

CDCl<sub>3</sub>): δ 189.75, 144.76, 143.51, 141.64, 132.13, 130.91, 130.42, 129.80, 129.59, 129.15, 128.96, 128.56, 128.53, 128.48, 128.37, 127.92, 125.89, 124.56, 123.82 (q, *J* = 276.0 Hz), 123.73, 120.57, 102.89, 99.08, 89.04, 82.28, 63.68 (q, *J* = 35.0 Hz), 62.11.

**HRMS (ESI)** *m/z* Calcd for [C<sub>29</sub>H<sub>17</sub>Br<sub>2</sub>F<sub>3</sub>NaO<sub>3</sub>, M + Na]<sup>+</sup>: 650.9497, Found: 650.9397.

**HPLC analysis:** Chiralcel IA-H (Hexane/*i*-PrOH) = 95:5, flow rate = 1.0 mL/min,

wave length = 254 nm, *t*<sub>R</sub> = 5.643 min (major), *t*<sub>R</sub> = 6.553 (minor). **Optical Rotation:**

[α]<sub>D</sub><sup>20</sup> = 170° (c = 1.0, CH<sub>3</sub>OH); **Physical properties:** yellow foam; **Yield:** (SiO<sub>2</sub>,

PE:EA= 10:1) 72 %, 45.2 mg.

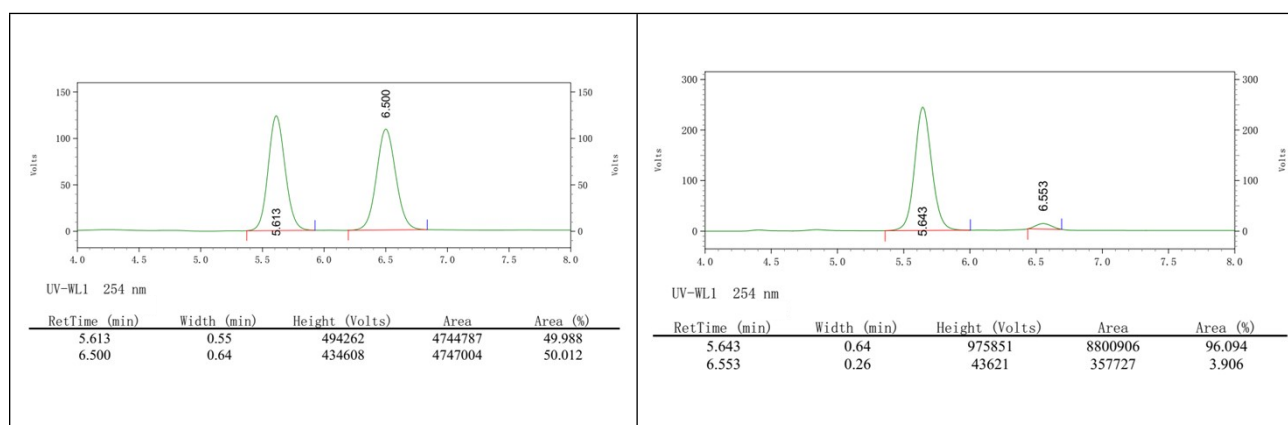

**(R)-1-bromo-1-((S)-4-bromo-1-(p-tolylethynyl)-1-(2,2,2-trifluoroethoxy)-1H-  
isochromen-3-yl)naphthalen-2(1H)-one (2t)**

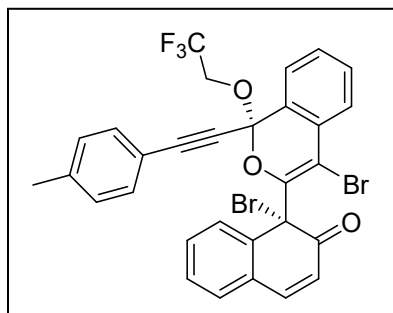

$^1\text{H NMR}$  (400 MHz, Toluene- $d_8$ ):  $\delta$  7.92 – 7.87 (m, 1H), 7.38 (d,  $J$  = 8.0 Hz, 2H), 7.29 – 7.21 (m, 2H), 7.02 – 6.97 (m, 2H), 6.78 (t,  $J$  = 7.9 Hz, 3H), 6.75 – 6.68 (m, 3H), 6.16 (d,  $J$  = 10.0 Hz, 1H), 5.08 (dq,  $J$  = 11.9, 8.7 Hz, 1H), 5.00 – 4.89 (m, 1H), 1.98 (s, 3H).  $^{13}\text{C NMR}$  (100 MHz, Toluene-

$d_8$ ):  $\delta$  189.23, 145.69, 143.08, 142.36, 140.17, 132.37, 130.85, 130.56, 129.58, 129.39, 129.37, 128.69, 128.49, 126.30, 124.86 (q,  $J$  = 276.0 Hz), 124.83, 124.11, 118.13, 103.49, 100.00, 89.86, 82.62, 64.53 (q,  $J$  = 35.0 Hz), 62.75, 21.30. **HRMS (ESI)  $m/z$**  Calcd for  $[\text{C}_{30}\text{H}_{19}\text{Br}_2\text{F}_3\text{NaO}_3, \text{M} + \text{Na}]^+$ : 664.9653, Found: 664.9547. **HPLC analysis:** Chiralcel IA-H (Hexane/*i*-PrOH) = 95:5, flow rate = 1.0 mL/min, wave length = 254 nm,  $t_{\text{R}}$  = 5.767 min (major),  $t_{\text{R}}$  = 6.780 (minor). **Optical Rotation:**  $[\alpha]_D^{20}$  = 171° ( $c$  = 1.0,  $\text{CH}_3\text{OH}$ ); **Physical properties:** yellow foam; **Yield:** ( $\text{SiO}_2$ , PE:EA= 10:1) 79 %, 50.7 mg.

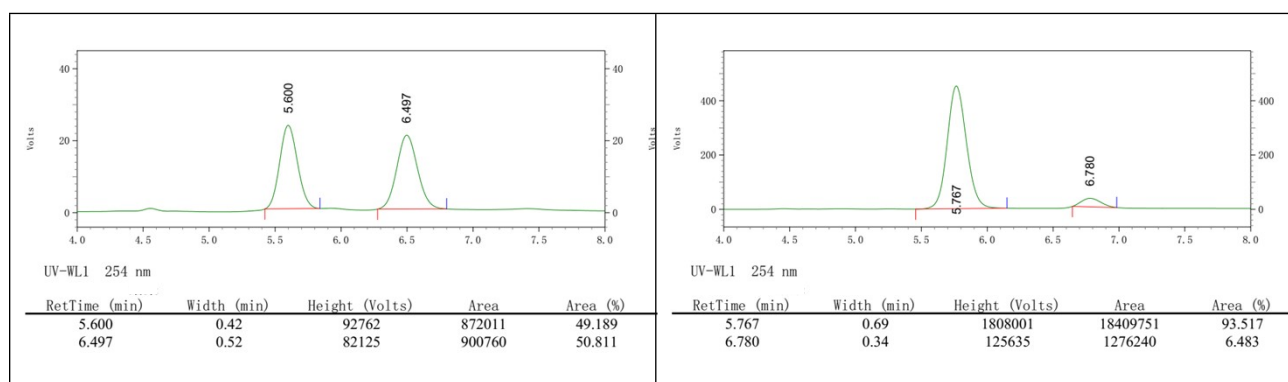

**(R)-1-bromo-1-((S)-4-bromo-1-(hex-1-yn-1-yl)-6-methyl-1-(2,2,2-trifluoroethoxy)-1H-isochromen-3-yl)naphthalen-2(1H)-one (2u)**

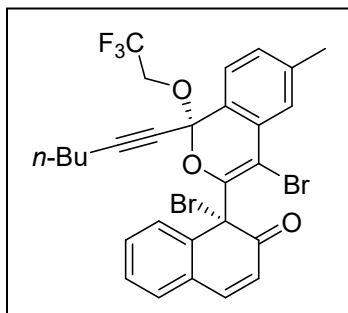

$^1\text{H NMR}$  (400 MHz, Toluene- $d_8$ ):  $\delta$  7.78 (d,  $J = 7.8$  Hz, 1H), 7.24 (d,  $J = 7.7$  Hz, 1H), 7.13 (s, 1H), 6.86 (d,  $J = 7.8$  Hz, 1H), 6.84 – 6.79 (m, 1H), 6.72 (m, 3H), 6.16 (d,  $J = 10.0$  Hz, 1H), 5.06 – 4.86 (m, 2H), 2.05 (d,  $J = 7.0$  Hz, 2H), 1.95 (s, 3H), 1.40 – 1.26 (m, 4H), 0.79 (t,  $J = 7.1$  Hz, 3H).  $^{13}\text{C NMR}$  (100

MHz, Toluene- $d_8$ ):  $\delta$  189.34, 145.65, 143.21, 142.36, 140.64, 130.81, 129.70, 129.66, 129.18, 128.90, 128.61, 128.48, 127.03, 126.31, 125.22, 124.91 (q,  $J = 275.0$  Hz), 124.04, 103.40, 99.55, 90.93, 75.03, 64.24 (q,  $J = 35.0$  Hz), 62.94, 30.47, 22.30, 21.14, 18.40, 13.60. **HRMS (ESI)**  $m/z$  Calcd for  $[\text{C}_{28}\text{H}_{23}\text{Br}_2\text{F}_3\text{NaO}_3, \text{M} + \text{Na}]^+$ : 644.9966, Found: 644.9866. **HPLC analysis:** Chiralcel IA-H (Hexane/*i*-PrOH) = 98:2, flow rate = 1.0 mL/min, wave length = 254 nm,  $t_R = 5.377$  min (major),  $t_R = 5.680$  (minor).

**Optical Rotation:**  $[\alpha]_D^{20} = 160^\circ$  ( $c = 1.0$ ,  $\text{CH}_3\text{OH}$ ); **Physical properties:** yellow foam; **Yield:** ( $\text{SiO}_2$ , PE:EA= 10:1) 74%, 46.0mg.

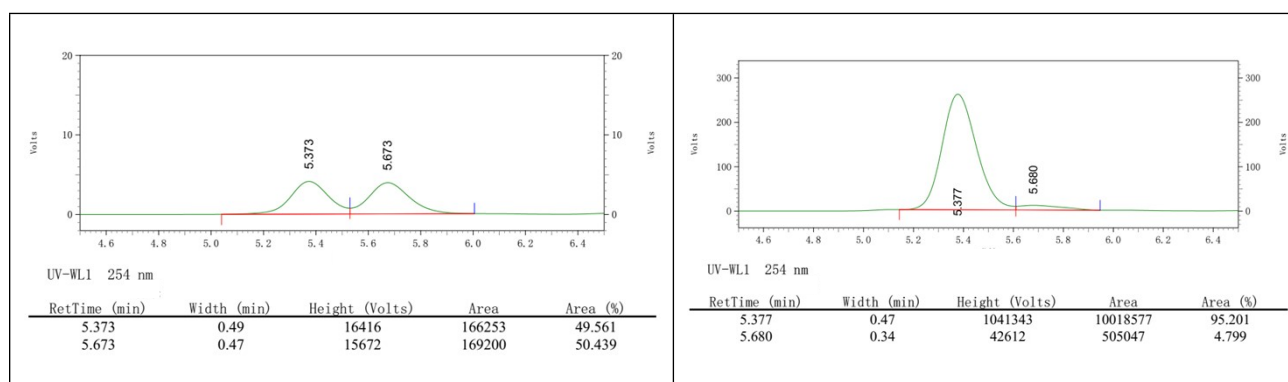

**(R)-1-bromo-1-((S)-4-bromo-8-fluoro-1-(hex-1-yn-1-yl)-1-(2,2,2-trifluoroethoxy)-1H-isochromen-3-yl)naphthalen-2(1H)-one (2v)**

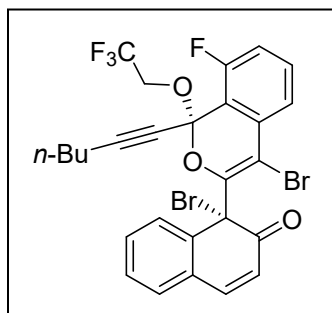

**<sup>1</sup>H NMR** (400 MHz, Toluene-*d*<sub>8</sub>) δ 7.64 (dd, *J* = 8.4, 2.5 Hz, 1H), 7.19 (d, *J* = 7.7 Hz, 1H), 7.06 (dd, *J* = 8.5, 5.1 Hz, 1H), 6.84 (d, *J* = 7.4 Hz, 1H), 6.76 (m, 3H), 6.62 (t, *J* = 8.4 Hz, 1H), 6.16 (d, *J* = 10.0 Hz, 1H), 4.87 (m, 2H), 2.00 (t, *J* = 6.8 Hz, 2H), 1.27 (m, 4H), 0.76 (t, *J* = 7.0 Hz, 3H). **<sup>13</sup>C NMR** (100 MHz, Toluene-*d*<sub>8</sub>) δ: 189.28, 163.02 (d, *J* = 248.0 Hz), 145.20 (d, *J* = 2.0 Hz), 143.28, 142.15, 131.32 (d, *J* = 8.0 Hz), 131.28, 130.87, 129.71, 129.04, 128.54, 128.44, 127.07 (d, *J* = 8.0 Hz), 125.68 (d, *J* = 2.0 Hz), 124.71 (q, *J* = 276.0 Hz), 123.98, 117.46 (d, *J* = 22.0 Hz), 113.06 (d, *J* = 25.0 Hz), 102.36, 98.84, 91.82, 74.26, 64.31 (q, *J* = 36.0 Hz), 62.65, 30.30, 22.25, 18.25, 13.49. **HRMS (ESI)** *m/z* Calcd for [C<sub>27</sub>H<sub>20</sub>Br<sub>2</sub>F<sub>4</sub>NaO<sub>3</sub>, M + Na]<sup>+</sup>: 648.9715, Found: 648.9621. **HPLC analysis:** Chiralcel IA-H (Hexane/*i*-PrOH) = 95:5, flow rate = 1.0 mL/min, wave length = 254 nm, *t*<sub>R</sub> = 4.970 min (major), *t*<sub>R</sub> = 5.660 (minor). **Optical Rotation:** [α]<sub>D</sub><sup>20</sup> = 236° (c = 1.0, CH<sub>2</sub>Cl<sub>2</sub>); **Physical properties:** yellow foam; **Yield:** (SiO<sub>2</sub>, PE:EA= 10:1) 79%, 49.4 mg.

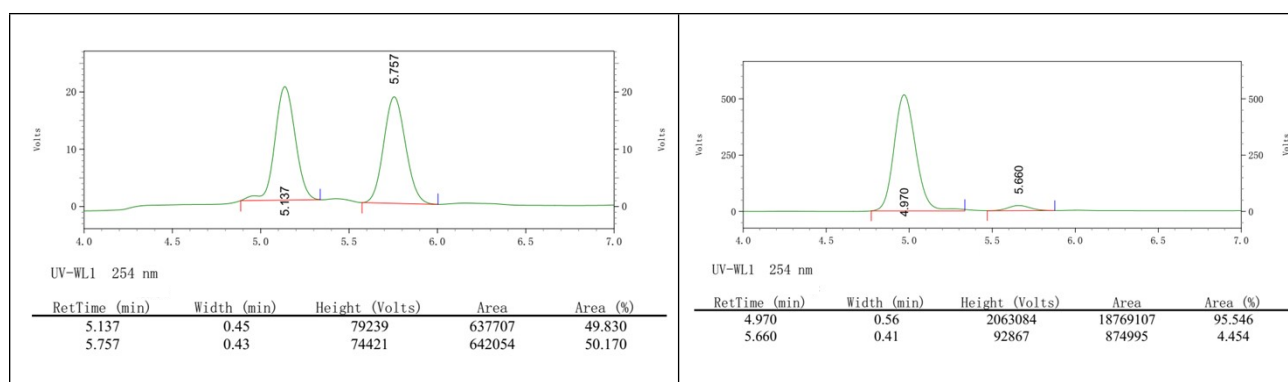

**(R)-1-bromo-1-((S)-4-bromo-1-methyl-1-(2,2,2-trifluoroethoxy)-1H-isochromen-**

**3-yl)naphthalen-2(1H)-one (2w)**

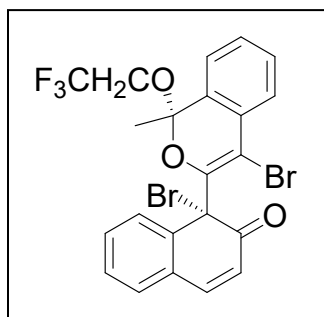

**<sup>1</sup>H NMR** (400 MHz, Toluene-*d*<sub>8</sub>) δ 7.30 – 7.24 (m, 2H), 7.08 – 7.04 (m, 1H), 6.98 – 6.93 (m, 2H), 6.88 – 6.80 (m, 2H), 6.80 – 6.73 (m, 2H), 6.17 (d, *J* = 9.9 Hz, 1H), 4.50 (dq, *J* = 12.0, 8.8 Hz, 1H), 4.10 (dq, *J* = 12.0, 8.9 Hz, 1H), 1.92 (s, 3H). **<sup>13</sup>C NMR** (100 MHz, Toluene-*d*<sub>8</sub>) δ 189.03, 146.98, 143.05, 142.27, 130.72, 129.91, 129.78, 129.74, 128.95, 128.50, 124.76, 124.74 (q, *J* = 275.0 Hz), 124.58, 124.13, 103.92, 101.39, 63.23, 62.36 (q, *J* = 35.0 Hz), 48.07, 25.37. **HRMS (ESI)** *m/z* Calcd for [C<sub>22</sub>H<sub>15</sub>Br<sub>2</sub>F<sub>3</sub>NaO<sub>3</sub>, M+ Na]<sup>+</sup>: 564.9340, Found: 564.9295. **HPLC analysis:** Chiralcel IA-H (Hexane/*i*-PrOH) = 95:5, flow rate = 1.0 mL/min, wave length = 254 nm, *t*<sub>R</sub> = 5.640 min (major), *t*<sub>R</sub> = 7.810 min (minor). **Optical Rotation:** [α]<sub>D</sub><sup>20</sup> = 109° (c = 1.0, CH<sub>3</sub>OH); **Physical properties:** yellow foam; **Yield:** (SiO<sub>2</sub>, PE:EA= 10:1) 86%, 46.5 mg.

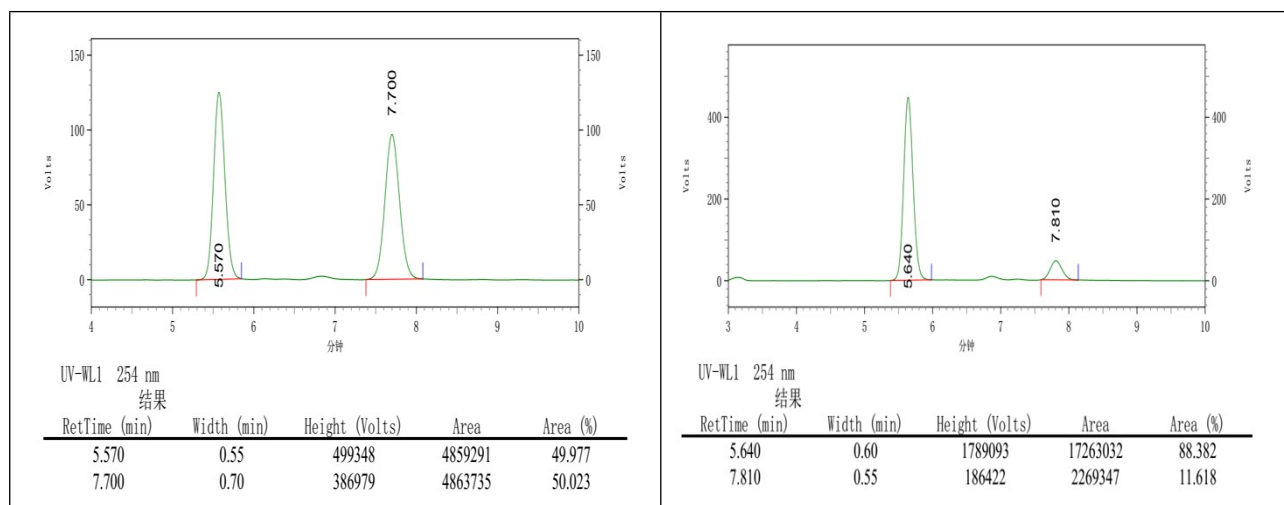



**(R)-1-bromo-1-((S)-4-bromo-1-((E)-styryl)-1-(2,2,2-trifluoroethoxy)-1H-  
isochromen-3-yl)naphthalen-2(1H)-one (4a)**

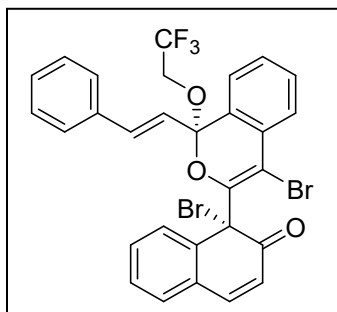

**<sup>1</sup>H NMR** (400 MHz, Toluene-*d*<sub>8</sub>)  $\delta$ : 7.37 (d, *J* = 7.5 Hz, 1H), 7.33 (dd, *J* = 7.1, 1.5 Hz, 1H), 7.30 – 7.26 (m, 1H), 7.26 – 7.21 (m, 2H), 7.14 (d, *J* = 16.1 Hz, 1H), 7.12 – 7.05 (m, 3H), 7.01 – 6.96 (m, 2H), 6.83 (t, *J* = 7.4 Hz, 1H), 6.79 – 6.69 (m, 4H), 6.19 (d, *J* = 10.0 Hz, 1H), 4.59 – 4.49 (m, 1H), 4.44 (dq, *J* = 11.9,

8.8 Hz, 1H). **<sup>13</sup>C NMR** (100 MHz, Toluene-*d*<sub>8</sub>)  $\delta$ : 189.09, 146.28, 143.10, 142.39, 136.18, 135.65, 130.79, 130.31, 130.14, 129.76, 129.26, 129.05, 128.97, 128.58, 128.36, 127.55, 125.85, 125.55, 124.91 (q, *J* = 276.0 Hz), 124.13, 104.17, 102.47, 63.30, 63.07 (q, *J* = 36.0 Hz). **HRMS (ESI)** *m/z* Calcd for [C<sub>29</sub>H<sub>19</sub>Br<sub>2</sub>F<sub>3</sub>NaO<sub>3</sub>, M + Na]<sup>+</sup>: 652.9653, Found: 652.9543. **HPLC analysis:** Chiralcel IA-H (Hexane/*i*-PrOH) = 95:5, flow rate = 1.0 mL/min, wave length = 254 nm, *t*<sub>R</sub> = 6.090 min (major), *t*<sub>R</sub> = 7.367 (minor). **Optical Rotation:**  $[\alpha]_D^{20} = 57^\circ$  (*c* = 1.0, CH<sub>2</sub>Cl<sub>2</sub>); **Physical properties:** yellow foam; **Yield:** (Alumina N-neutral, PE:EA= 10:1) 85 %, 53.4 mg.

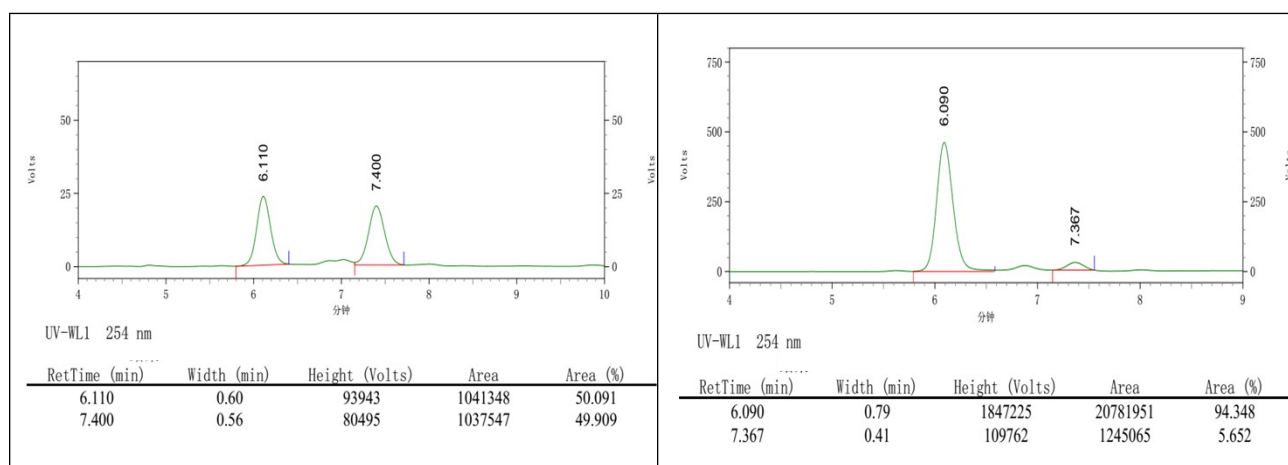

**(R)-1-bromo-1-((S)-4-bromo-1-((E)-4-methylstyryl)-1-(2,2,2-trifluoroethoxy)-1H-isochromen-3-yl)naphthalen-2(1H)-one (4b)**

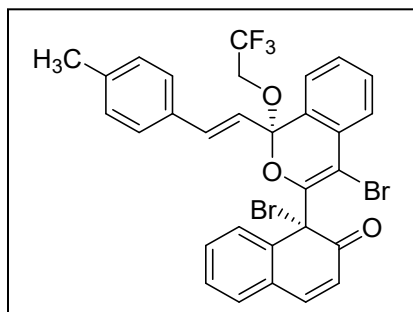

$^1\text{H NMR}$  (400 MHz, Toluene- $d_8$ )  $\delta$  7.38 (d,  $J = 7.5$  Hz, 1H), 7.35 – 7.28 (m, 2H), 7.21 (d,  $J = 8.0$  Hz, 2H), 7.16 (d,  $J = 16.1$  Hz, 1H), 6.97 (d,  $J = 5.4$  Hz, 2H), 6.93 (d,  $J = 8.0$  Hz, 2H), 6.85 – 6.79 (m, 1H), 6.79 – 6.70 (m, 4H), 6.18 (d,  $J = 10.0$  Hz, 1H), 4.61 – 4.50 (m, 1H), 4.50 – 4.39

(m, 1H), 2.11 (s, 3H).  $^{13}\text{C NMR}$  (100 MHz, Toluene- $d_8$ ):  $\delta$  189.07, 146.32, 143.03, 142.45, 138.95, 136.13, 133.01, 130.78, 130.36, 130.08, 129.80, 129.72, 129.41, 128.93, 128.40, 127.55, 125.89, 124.95 (q,  $J = 275.0$  Hz), 124.82, 124.56, 124.17, 104.33, 102.46, 63.30, 63.07 (q,  $J = 34.0$  Hz), 21.18. **HRMS (ESI)**  $m/z$  Calcd for  $[\text{C}_{30}\text{H}_{21}\text{Br}_2\text{F}_3\text{NaO}_3, \text{M} + \text{Na}]^+$ : 666.9810, Found: 666.9710. **HPLC analysis:** Chiralcel IA-H (Hexane/*i*-PrOH) = 95:5, flow rate = 1.0 mL/min, wave length = 254 nm,  $t_R = 6.723$  min (major),  $t_R = 8.487$  (minor). **Optical Rotation:**  $[\alpha]_D^{20} = 83^\circ$  ( $c = 1.0$ , CH<sub>3</sub>OH); **Physical properties:** yellow foam; **Yield:** (Alumina N-neutral, PE:EA= 10:1) 86%, 55.3 mg.

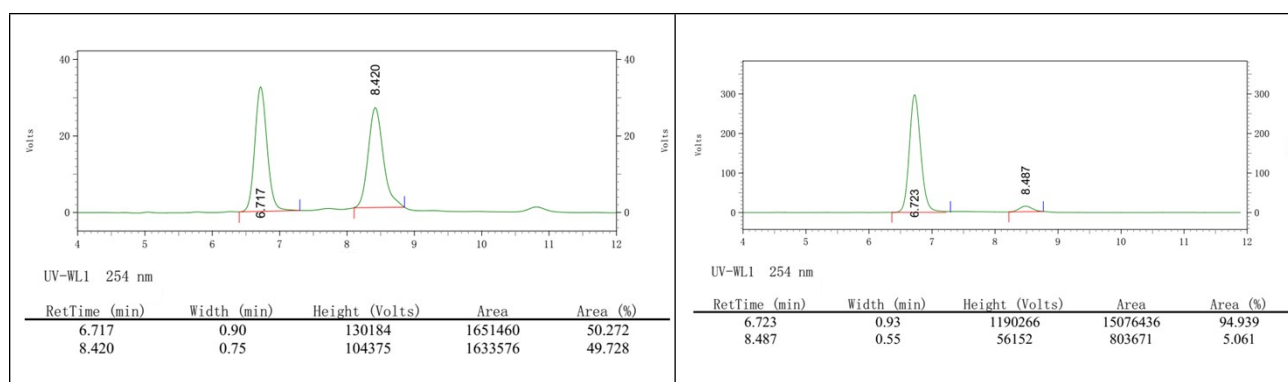

**(R)-1-bromo-1-((S)-4-bromo-1-((E)-4-fluorostyryl)-1-(2,2,2-trifluoroethoxy)-1H-  
isochromen-3-yl)naphthalen-2(1H)-one (4c)**

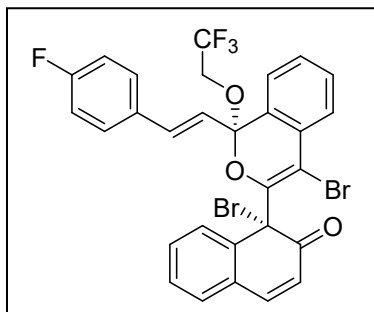

**<sup>1</sup>H NMR** (400 MHz, Toluene-*d*<sub>8</sub>): δ 7.40 – 7.31 (m, 2H), 7.26 (dd, *J* = 6.1, 2.7 Hz, 1H), 6.98 (m, 5H), 6.85 – 6.80 (m, 1H), 6.74 (m, 5H), 6.57 (d, *J* = 16.1 Hz, 1H), 6.18 (d, *J* = 10.0 Hz, 1H), 4.52 (dq, *J* = 11.6, 8.7 Hz, 1H), 4.45 – 4.35

(m, 1H). **<sup>13</sup>C NMR** (100 MHz, Toluene-*d*<sub>8</sub>) δ: 189.00, 163.44 (d, *J* = 248.0 Hz), 146.34, 143.03, 142.41, 134.74, 131.81, 131.78 (d, *J* = 3.0 Hz), 130.71, 130.39, 130.20, 129.78, 129.26, 129.18, 128.97, 128.95, 128.31, 125.83, 125.55, 124.88 (q, *J* = 275.0 Hz), 124.19, 116.04, 115.82, 104.17, 102.37, 63.28, 63.06 (q, *J* = 35.0 Hz). **HRMS (ESI)** *m/z* Calcd for [C<sub>29</sub>H<sub>18</sub>Br<sub>2</sub>F<sub>4</sub>NaO<sub>3</sub>, M + Na]<sup>+</sup>: 670.9559, Found: 670.9478. **HPLC analysis:** Chiralcel IA-H (Hexane/*i*-PrOH) = 95:5, flow rate = 1.0 mL/min, wave length = 254 nm, *t*<sub>R</sub> = 7.940 min (major), *t*<sub>R</sub> = 8.897 (minor).

**Optical Rotation:**  $[\alpha]_D^{20} = 300^\circ$  (c = 1.0, CH<sub>3</sub>OH). **Physical properties:** yellow foam; **Yield:** (Alumina N-neutral, PE:EA= 10:1) 90 %, 58.3 mg.

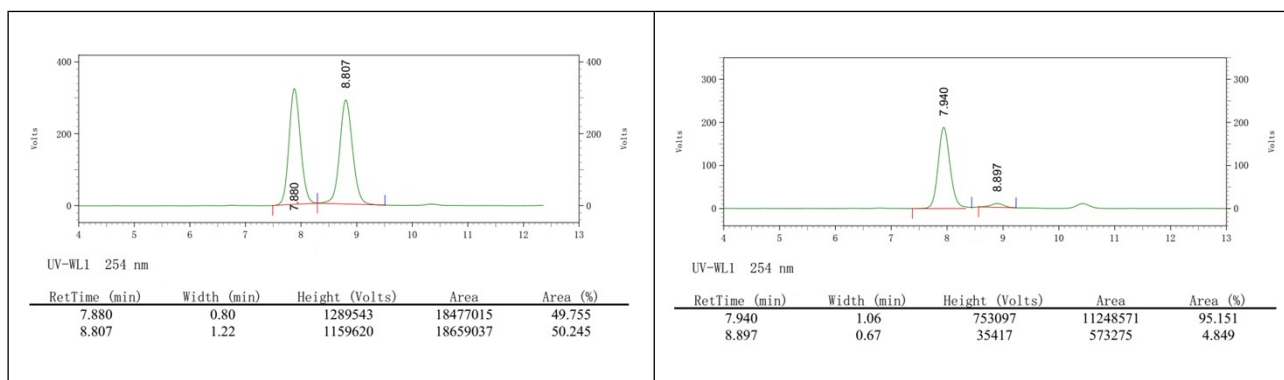

**(R)-1-bromo-1-((S)-4-bromo-1-((E)-4-chlorostyryl)-1-(2,2,2-trifluoroethoxy)-1H-isochromen-3-yl)naphthalen-2(1H)-one (4d)**

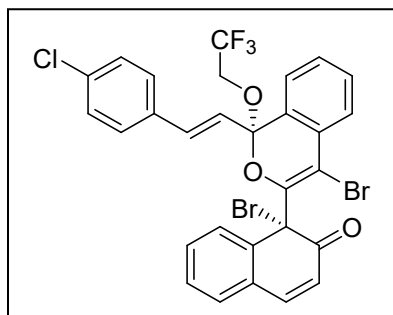

**<sup>1</sup>H NMR** (400 MHz, Toluene-*d*<sub>8</sub>) δ 7.38 – 7.32 (m, 2H), 7.27 – 7.24 (m, 1H), 7.05 – 6.97 (m, 5H), 6.94 (d, *J* = 8.5 Hz, 2H), 6.88 – 6.83 (m, 1H), 6.82 – 6.76 (m, 3H), 6.63 (d, *J* = 16.1 Hz, 1H), 6.19 (d, *J* = 10.0 Hz, 1H), 4.52 (dq, *J* = 11.8, 8.7 Hz, 1H), 4.46 – 4.35 (m, 1H). **<sup>13</sup>C NMR** (100

MHz, Toluene-*d*<sub>8</sub>) δ 189.10, 146.27, 143.18, 142.30, 134.87, 134.66, 134.05, 130.77, 130.29, 129.85, 129.22, 129.01, 128.95, 128.71, 128.27, 126.33, 125.81, 124.92, 124.85 (q, *J* = 276.0 Hz), 124.11, 104.02, 102.40, 63.30, 63.04 (q, *J* = 35.0 Hz). **HRMS (ESI)** *m/z* Calcd for [C<sub>29</sub>H<sub>18</sub>Br<sub>2</sub>ClF<sub>3</sub>NaO<sub>3</sub>, M+ Na]<sup>+</sup>: 686.9263, Found: 686.9185.

**HPLC analysis:** Chiralcel IA-H (Hexane/*i*-PrOH) =90:10, flow rate = 1.0 mL/min, wave length = 254 nm, *t*<sub>R</sub> = 6.377 min (major), *t*<sub>R</sub> = 6.873 min (minor). **Optical**

**Rotation:** [ $\alpha$ ]<sub>D</sub><sup>20</sup> = 110° (*c* = 1.0, CH<sub>2</sub>Cl<sub>2</sub>); **Physical properties:** (Alumina N-neutral, PE:EA= 10:1) yellow foam; **Yield:** 81%, 53.7 mg.

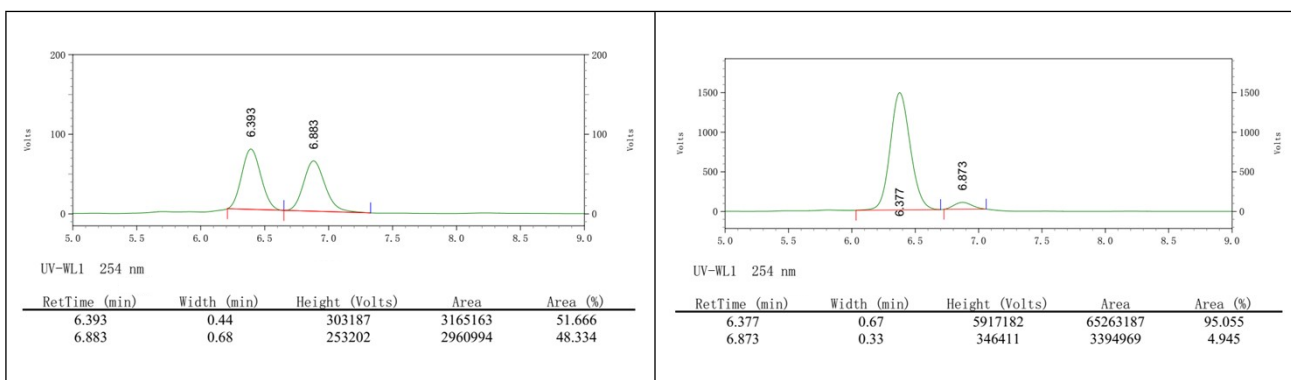

**(R)-1-bromo-1-((S)-4-bromo-1-(2,2,2-trifluoroethoxy)-1-((E)-4-(trifluoromethyl)styryl)-1H-isochromen-3-yl)naphthalen-2(1H)-one (4e)**

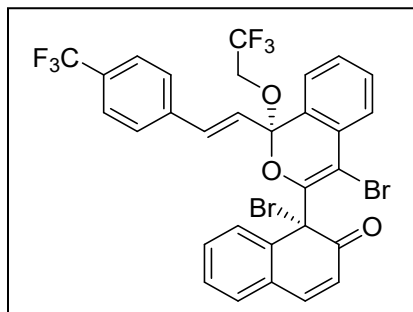

$^1\text{H NMR}$  (400 MHz, Toluene- $d_8$ ):  $\delta$  7.39 – 7.33 (m, 2H), 7.32 – 7.24 (m, 3H), 7.10 – 7.01 (m, 5H), 6.86 – 6.82 (m, 1H), 6.81 – 6.68 (m, 4H), 6.20 (d,  $J = 10.0$  Hz, 1H), 4.60 – 4.49 (m, 1H), 4.48 – 4.37 (m, 1H).  $^{13}\text{C NMR}$  (100 MHz, Toluene- $d_8$ ):  $\delta$  189.10, 146.25, 143.21, 142.27, 138.94,

134.38, 130.76, 130.67 (q,  $J = 32.0$  Hz), 130.39, 130.26, 129.89, 128.85, 128.73, 128.35, 126.19, 126.12, 125.88, 124.81 (q,  $J = 276.0$  Hz), 125.87, 125.81, 125.00, 124.10, 123.43, 120.67, 103.77, 102.43, 63.30, 63.10 (q,  $J = 35.0$  Hz). **HRMS (ESI)**  $m/z$  Calcd for  $[\text{C}_{30}\text{H}_{18}\text{Br}_2\text{F}_6\text{NaO}_3, \text{M}+\text{Na}]^+$ : 720.9527, Found: 720.9487. **HPLC analysis:** Chiralcel OD-H (Hexane/*i*-PrOH) =95:5, flow rate = 1.0 mL/min, wave length = 254 nm,  $t_{\text{R}} = 9.313$  min (major),  $t_{\text{R}} = 23.133$  min (minor). **Optical Rotation:**  $[\alpha]_{\text{D}}^{20} = 83^\circ$  ( $c = 1.0$ ,  $\text{CH}_3\text{OH}$ ); **Physical properties:** yellow foam; **Yield:** (Alumina N-neutral, PE:EA= 10:1) 84%, 58.6 mg.

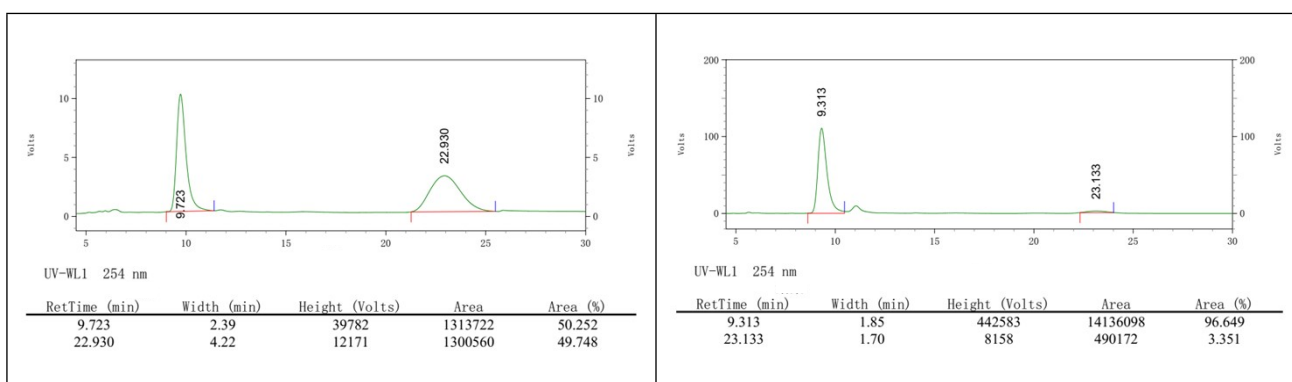

**(R)-1-bromo-1-((S)-4-bromo-1-((E)-2-(naphthalen-1-yl)vinyl)-1-(2,2,2-trifluoroethoxy)-1H-isochromen-3-yl)naphthalen-2(1H)-one (4f)**

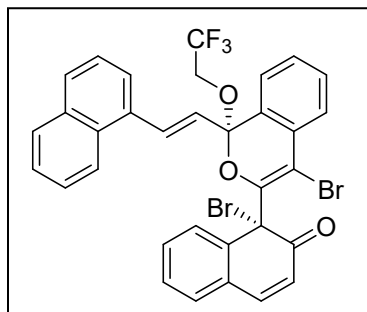

<sup>1</sup>H NMR (400 MHz, Toluene-*d*<sub>8</sub>) δ 8.15 – 8.10 (m, 1H), 8.02 (d, *J* = 15.8 Hz, 1H), 7.59 (dd, *J* = 9.3, 4.9 Hz, 3H), 7.40 (d, *J* = 7.7 Hz, 1H), 7.35 (ddt, *J* = 9.6, 6.8, 3.5 Hz, 2H), 7.27 – 7.22 (m, 1H), 7.22 – 7.17 (m, 2H), 7.02 – 6.98 (m, 2H), 6.83 – 6.68 (m, 5H), 6.19 (d, *J* = 10.0 Hz, 1H), 4.65 (dq, *J* = 11.8,

8.7 Hz, 1H), 4.59 – 4.48 (m, 1H). <sup>13</sup>C NMR (100 MHz, Toluene-*d*<sub>8</sub>): δ 189.12, 146.24, 143.12, 142.39, 134.24, 133.53, 133.36, 131.98, 130.84, 130.35, 130.18, 129.75, 129.53, 129.29, 129.03, 128.98, 128.94, 128.58, 128.37, 126.89, 126.25, 125.87, 125.84, 124.96 (q, *J* = 276.0 Hz), 124.91, 124.64, 124.13, 123.70, 104.07, 102.48, 63.39, 63.15 (q, *J* = 34.0 Hz). HRMS (ESI) *m/z* Calcd for [C<sub>33</sub>H<sub>21</sub>Br<sub>2</sub>F<sub>3</sub>NaO<sub>3</sub>, M+ Na]<sup>+</sup>: 702.9810, Found: 702.9759. HPLC analysis: Chiralcel IA-H (Hexane/*i*-PrOH) =95:5, flow rate = 1.0 mL/min, wave length = 254 nm, *t*<sub>R</sub> = 6.780 min (major), *t*<sub>R</sub> = 7.907 min (minor). Optical Rotation: [α]<sub>D</sub><sup>20</sup> = 126° (c = 1.0, CH<sub>3</sub>OH); Physical properties: yellow foam; Yield: (Alumina N-neutral, PE:EA= 10:1) 90%, 61.2 mg.

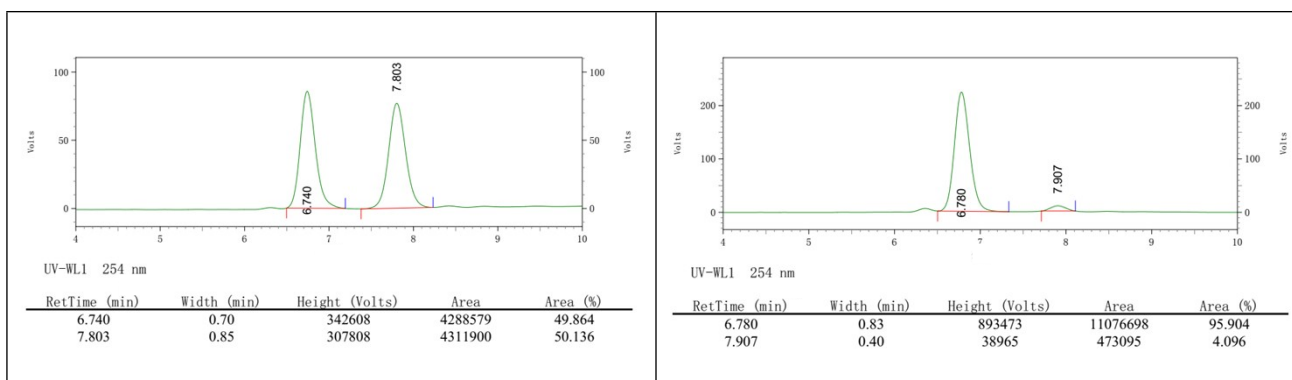

**(R)-1-bromo-1-((S)-4-bromo-1-((E)-2-(thiophen-2-yl)vinyl)-1-(2,2,2-trifluoroethoxy)-1H-isochromen-3-yl)naphthalen-2(1H)-one (4g)**

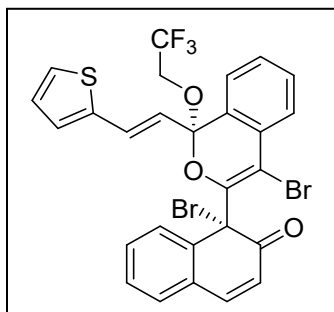

**<sup>1</sup>H NMR** (400 MHz, Toluene-*d*<sub>8</sub>): δ 7.36 – 7.23 (m, 4H), 6.96 – 6.89 (m, 2H), 6.85 – 6.80 (m, 1H), 6.79 – 6.65 (m, 6H), 6.64 – 6.59 (m, 1H), 6.16 (d, *J* = 10.0 Hz, 1H), 4.59 – 4.48 (m, 1H), 4.47 – 4.36 (m, 1H). **<sup>13</sup>C NMR** (100 MHz, Toluene-*d*<sub>8</sub>): δ

189.05, 146.22, 143.04, 142.38, 140.44, 130.80, 130.23, 130.12, 129.71, 129.19, 129.02, 128.38, 127.86, 126.25, 125.80, 124.76 (q, *J* = 255.0 Hz), 124.71, 124.14, 123.48, 103.86, 102.51, 63.26, 63.06 (q, *J* = 29.0 Hz). **HRMS**

**(ESI)** *m/z* Calcd for [C<sub>27</sub>H<sub>17</sub>Br<sub>2</sub>F<sub>3</sub>O<sub>3</sub>NaS, M+ Na]<sup>+</sup>: 658.9217, Found: 658.9177. **HPLC**

**analysis:** Chiralcel AD-H (Hexane/*i*-PrOH) =80:20, flow rate = 1.0 mL/min, wave length = 254 nm, *t*<sub>R</sub> = 11.130 min (major), *t*<sub>R</sub> = 14.220 min (minor). **Optical Rotation:**

[α]<sub>D</sub><sup>20</sup> = 126° (c = 1.0, CH<sub>3</sub>OH); **Physical properties:** yellow foam; **Yield:** (Alumina N-neutral, PE:EA= 10:1) 75%, 47.7 mg.

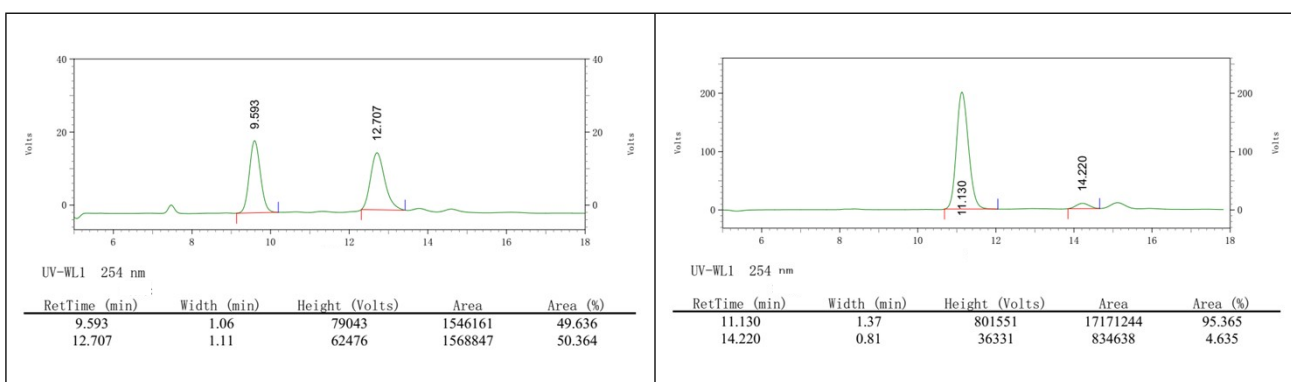

**(R)-1-bromo-1-((S)-4-bromo-1-((E)-styryl)-1-(2,2,2-trifluoroethoxy)-1H-isochromen-3-yl)-6-(3,5-dimethylphenyl)naphthalen-2(1H)-one (4h)**

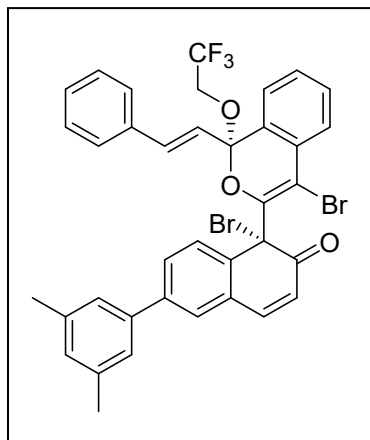

<sup>1</sup>H NMR (400 MHz, Toluene-*d*<sub>8</sub>) δ 7.47 (d, *J* = 8.1 Hz, 1H), 7.39 (dd, *J* = 7.5, 1.5 Hz, 1H), 7.32 – 7.26 (m, 3H), 7.22 (d, *J* = 16.1 Hz, 1H), 7.18 (d, *J* = 1.6 Hz, 1H), 7.13 – 7.06 (m, 4H), 7.00 (td, *J* = 6.8, 1.4 Hz, 2H), 6.97 (s, 2H), 6.87 (d, *J* = 10.1 Hz, 1H), 6.81 – 6.75 (m, 2H), 6.26 (d, *J* = 10.0 Hz, 1H), 4.58 (dq, *J* = 10.2, 7.9, 7.3 Hz, 1H), 4.49 (dq, *J* = 11.9, 8.9,

7.9 Hz, 1H), 2.19 (s, 6H). <sup>13</sup>C NMR (100 MHz, Toluene-*d*<sub>8</sub>): δ 189.10, 146.30, 143.28, 142.65, 140.75, 139.70, 138.40, 136.22, 135.72, 130.36, 130.16, 130.00, 129.60, 129.35, 128.97, 128.50, 128.48, 127.59, 125.90, 125.58, 125.36, 125.12, 124.95 (q, *J* = 276.0 Hz), 124.88, 124.42, 104.17, 102.53, 63.58, 63.15 (q, *J* = 35.0 Hz), 21.37. **HRMS (ESI)** *m/z* Calcd for [C<sub>37</sub>H<sub>27</sub>Br<sub>2</sub>F<sub>3</sub>NaO<sub>3</sub>, M+ Na]<sup>+</sup>: 757.0279, Found: 757.0189. **HPLC analysis:** Chiralcel AD-H (Hexane/*i*-PrOH) =95:5, flow rate = 1.0 mL/min, wave length = 254 nm, *t*<sub>R</sub> = 4.647 min (major), *t*<sub>R</sub> = 6.050 min (minor). **Optical Rotation:** [α]<sub>D</sub><sup>20</sup> = 11° (*c* = 1.0, CH<sub>3</sub>OH); **Physical properties:** yellow foam; **Yield:** (Alumina N-neutral, PE:EA= 10:1) 70%, 51.4 mg.

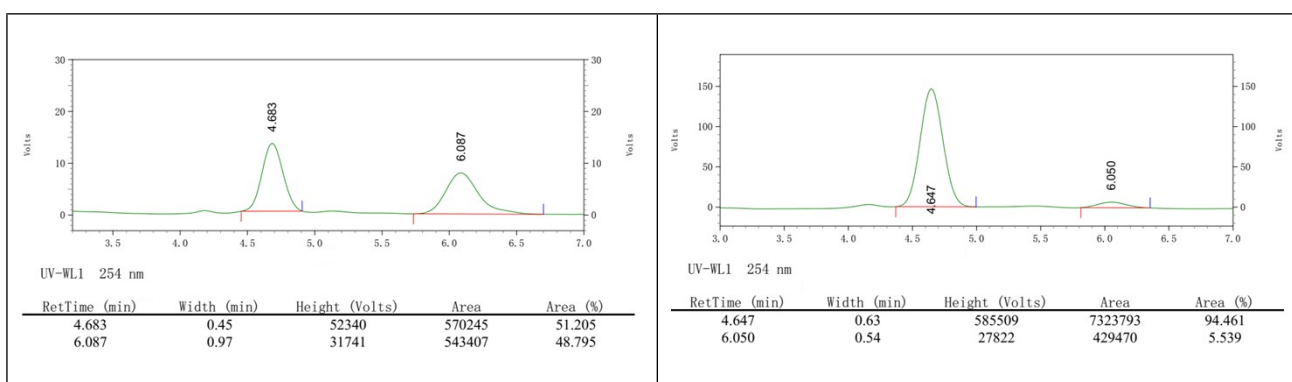



**(R)-1-((S)-1-(benzyloxy)-4-bromo-1-((E)-2-(naphthalen-1-yl)vinyl)-1H-isochromen-3-yl)-1-bromonaphthalen-2(1H)-one (4i)**

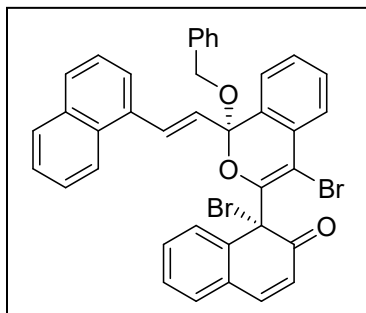

$^1\text{H NMR}$  (400 MHz, Toluene- $d_8$ ):  $\delta$  7.99 (d,  $J = 8.2$  Hz, 1H), 7.92 (d,  $J = 15.8$  Hz, 1H), 7.58 (dd,  $J = 8.2, 3.6$  Hz, 2H), 7.55 – 7.50 (m, 3H), 7.45 – 7.38 (m, 2H), 7.22 (dd,  $J = 15.1, 7.4$  Hz, 2H), 7.18 – 7.12 (m, 3H), 7.06 (d,  $J = 2.8$  Hz, 1H), 7.05 – 7.00 (m, 2H), 6.97 (s, 1H), 6.85 (d,  $J = 15.8$  Hz, 1H), 6.82

– 6.72 (m, 3H), 6.69 (td,  $J = 8.7, 7.9, 1.5$  Hz, 1H), 6.24 (d,  $J = 10.0$  Hz, 1H), 5.27 (d,  $J = 11.5$  Hz, 1H), 5.11 (d,  $J = 11.5$  Hz, 1H).  $^{13}\text{C NMR}$  (100 MHz, Toluene- $d_8$ ):  $\delta$  188.98,

147.36, 142.88, 142.70, 138.75, 134.22, 133.85, 132.31, 132.00, 130.86, 130.80, 130.44, 129.74, 129.68, 129.17, 128.77, 128.51, 128.45, 127.88, 127.65, 126.72, 126.15, 126.08, 125.85, 125.74, 124.69, 124.56, 124.33, 123.96, 105.13, 101.58, 67.80,

63.94. **HRMS (ESI)**  $m/z$  Calcd for  $[\text{C}_{38}\text{H}_{26}\text{Br}_2\text{NaO}_3, \text{M}^+ \text{Na}]^+$ : 711.0249, Found:

711.0139. **HPLC analysis:** Chiralcel OD-H (Hexane/*i*-PrOH) = 80:20, flow rate = 1.0 mL/min, wave length = 254 nm,  $t_R = 9.927$  min (major),  $t_R = 12.963$  min (minor).

**Optical Rotation:**  $[\alpha]_D^{20} = 25^\circ$  ( $c = 1.0, \text{CH}_2\text{Cl}_2$ ); **Physical properties:** white solid;

**Yield:** (Alumina N-neutral, PE:EA= 10:1) 83%, 57.1 mg.

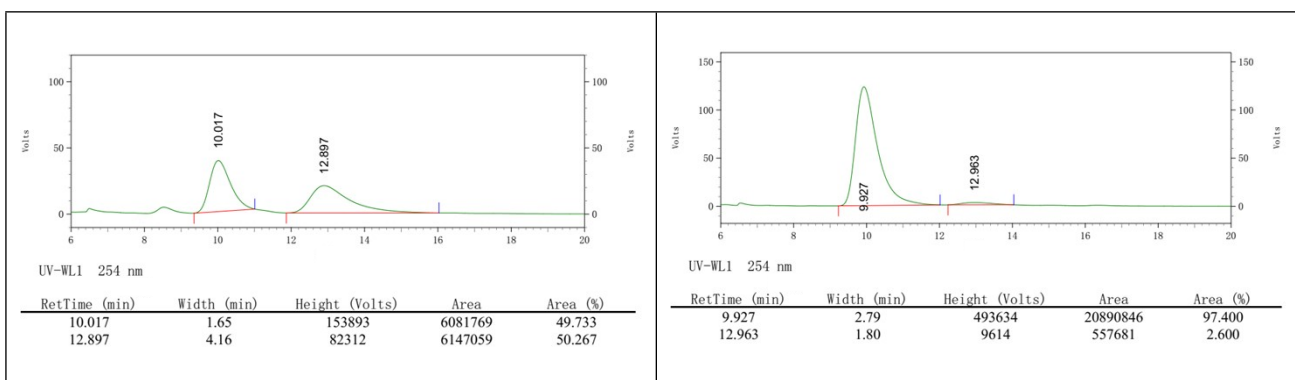

**(R)-1-bromo-1-((S)-4-bromo-1-methoxy-1-((E)-2-(naphthalen-1-yl)vinyl)-1H-isochromen-3-yl)naphthalen-2(1H)-one (4j)**

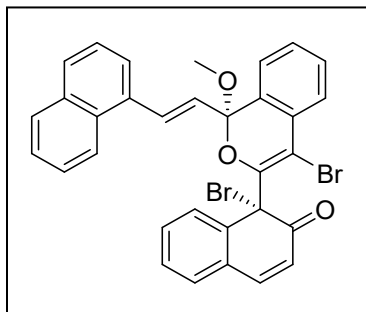

**<sup>1</sup>H NMR** (400 MHz, CDCl<sub>3</sub>): δ 8.13 – 8.06 (m, 1H), 7.85 (d, *J* = 8.2 Hz, 2H), 7.78 (dd, *J* = 11.3, 3.5 Hz, 2H), 7.56 – 7.44 (m, 7H), 7.38 (dt, *J* = 14.2, 7.4 Hz, 3H), 7.30 (t, *J* = 7.3 Hz, 1H), 7.18 (t, *J* = 7.3 Hz, 1H), 6.75 (d, *J* = 15.8 Hz, 1H), 6.47 (d, *J* = 9.9 Hz, 1H), 3.68 (s, 3H). **<sup>13</sup>C NMR** (100 MHz,

CDCl<sub>3</sub>): δ 189.61, 146.25, 143.17, 142.05, 133.61, 133.57, 132.30, 131.29, 130.84, 129.92, 129.75, 129.51, 129.46, 128.96, 128.82, 128.59, 128.43, 128.15, 128.01, 126.44, 125.97, 125.57, 125.39, 124.42, 124.18, 123.96, 123.64, 104.11, 101.02, 63.04, 52.42. **HRMS (ESI)** *m/z* Calcd for [C<sub>32</sub>H<sub>22</sub>Br<sub>2</sub>NaO<sub>3</sub>, M+ Na]<sup>+</sup>: 634.9936, Found: 634.9857. **HPLC analysis:** Chiralcel IA-H (Hexane/*i*-PrOH) =95:5, flow rate = 1.0 mL/min, wave length = 254 nm, *t<sub>R</sub>* = 10.910 min (major), *t<sub>R</sub>* = 12.800 min (minor).

**Optical Rotation:**  $[\alpha]_D^{20} = 141^\circ$  (*c* = 1, CH<sub>2</sub>Cl<sub>2</sub>); **Physical properties:** (Alumina N-neutral, PE:EA= 10:1) yellow solid; **Yield:** 88%, 53.8 mg.

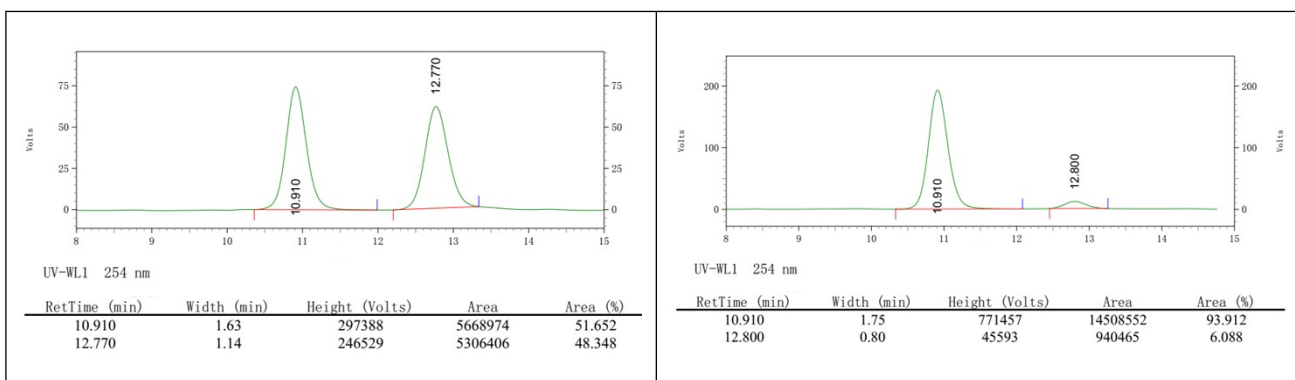

## 2-(2-(hept-2-ynoyl)phenyl)naphtho[2,1-b]furan-1(2H)-one (5i)

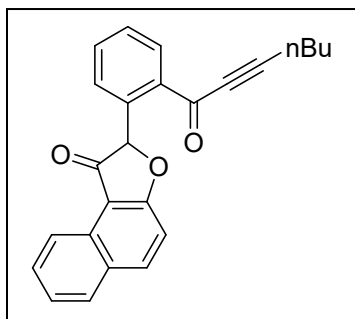

**$^1\text{H}$  NMR** (400 MHz,  $\text{CDCl}_3$ )  $\delta$  8.72 (d,  $J = 8.2$  Hz, 1H), 8.37 – 8.31 (m, 1H), 8.12 (d,  $J = 9.0$  Hz, 1H), 7.85 (d,  $J = 8.1$  Hz, 1H), 7.63 (t,  $J = 7.6$  Hz, 1H), 7.52 – 7.44 (m, 3H), 7.38 (d,  $J = 9.0$  Hz, 2H), 7.15 (s, 1H), 2.52 (t,  $J = 7.1$  Hz, 2H), 1.73 – 1.63 (m, 2H), 1.52 (m, 2H), 0.97 (t,  $J = 7.3$  Hz, 3H).  **$^{13}\text{C}$  NMR** (100 MHz,  $\text{CDCl}_3$ )  $\delta$  197.68, 179.77, 175.23, 139.87, 135.43, 134.42, 133.63, 133.06, 129.82, 129.45, 129.42, 128.47, 128.41, 126.06, 125.40, 123.13, 113.76, 112.21, 96.97, 83.58, 80.90, 29.75, 22.09, 18.99, 13.52. **HRMS (ESI)**  $m/z$  Calcd for  $[\text{C}_{25}\text{H}_{20}\text{NaO}_3, \text{M} + \text{Na}]^+$ : 391.1412, Found: 391.1285. **HPLC analysis:** Chiralcel OD-H (Hexane/*i*-PrOH) = 90:10, flow rate = 1.0 mL/min, wave length = 254 nm,  $t_R = 12.927$  min (minor),  $t_R = 14.083$  min (major). **Physical properties:** yellow oil; **Yield:** ( $\text{SiO}_2$ , PE:EA= 10:1) 90%.

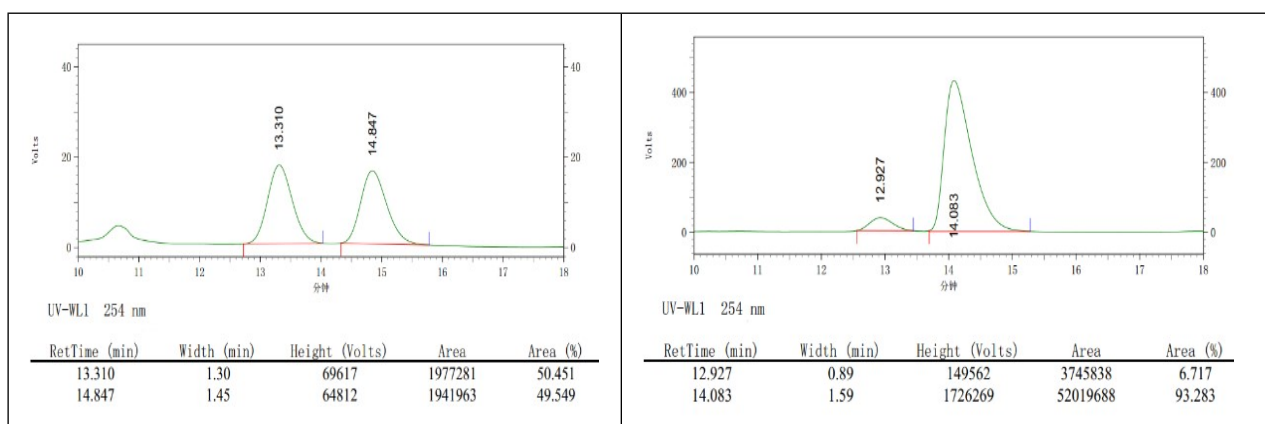

**1-(4-bromo-1-(hex-1-yn-1-yl)-1-(2,2,2-trifluoroethoxy)-1H-isochromen-3-yl)naphthalen-2-yl acetate (6j)**

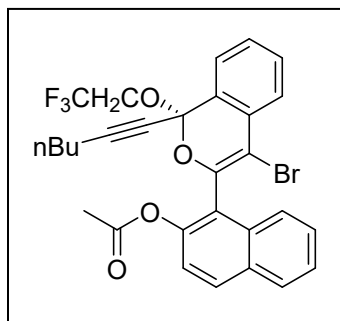

**<sup>1</sup>H NMR** (400 MHz, CDCl<sub>3</sub>) δ 7.96 (d, *J* = 9.0 Hz, 1H), 7.87 (dd, *J* = 6.7, 2.6 Hz, 1H), 7.83 (dd, *J* = 6.7, 2.8 Hz, 1H), 7.77 (d, *J* = 7.5 Hz, 1H), 7.69 (d, *J* = 7.7 Hz, 1H), 7.54 (t, *J* = 7.5 Hz, 1H), 7.51 – 7.44 (m, 3H), 7.41 (d, *J* = 9.0 Hz, 1H), 4.49 (dq, *J* = 11.5, 8.9 Hz, 1H), 4.13 (dq, *J* = 11.7, 8.6 Hz, 1H), 2.33 (t, *J* = 7.1 Hz, 2H), 2.26 (s, 3H), 1.55 (p, *J* = 7.0 Hz, 2H), 1.42 (h, *J* = 7.1 Hz, 2H), 0.90 (t, *J* = 7.3 Hz, 3H). **<sup>13</sup>C NMR** (100 MHz, CDCl<sub>3</sub>) δ 169.14, 146.73, 142.60, 131.57, 131.46, 130.81, 130.29, 128.70, 128.22, 128.16, 127.30, 126.34, 126.03, 125.26, 124.92, 122.82, 122.47, 121.76, 104.57, 98.02, 91.43, 77.00, 74.53, 62.59 (*J* = 34.0 Hz), 30.02, 21.93, 20.81, 18.30, 13.45. **HRMS (ESI)** *m/z* Calcd for [C<sub>29</sub>H<sub>24</sub>BrF<sub>3</sub>NaO<sub>4</sub>, M+Na]<sup>+</sup>: 595.0801, Found: 595.0707. **HPLC analysis:** Chiralcel AD-H (Hexane/*i*-PrOH) = 98:2, flow rate = 1.0 mL/min, wave length = 254 nm, *t*<sub>R</sub> = 4.907 min (minor), *t*<sub>R</sub> = 5.820 min (major). **Physical properties:** yellow foam; **Yield:** (SiO<sub>2</sub>, PE:EA= 10:1) 88%

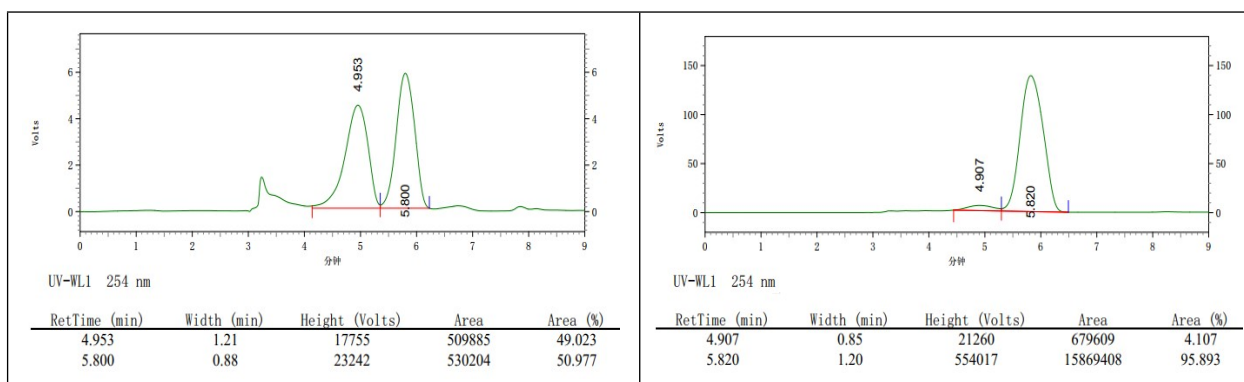

# IX. <sup>1</sup>H and <sup>13</sup>C NMR spectra of substrates (1a-1k, 3a-3g)

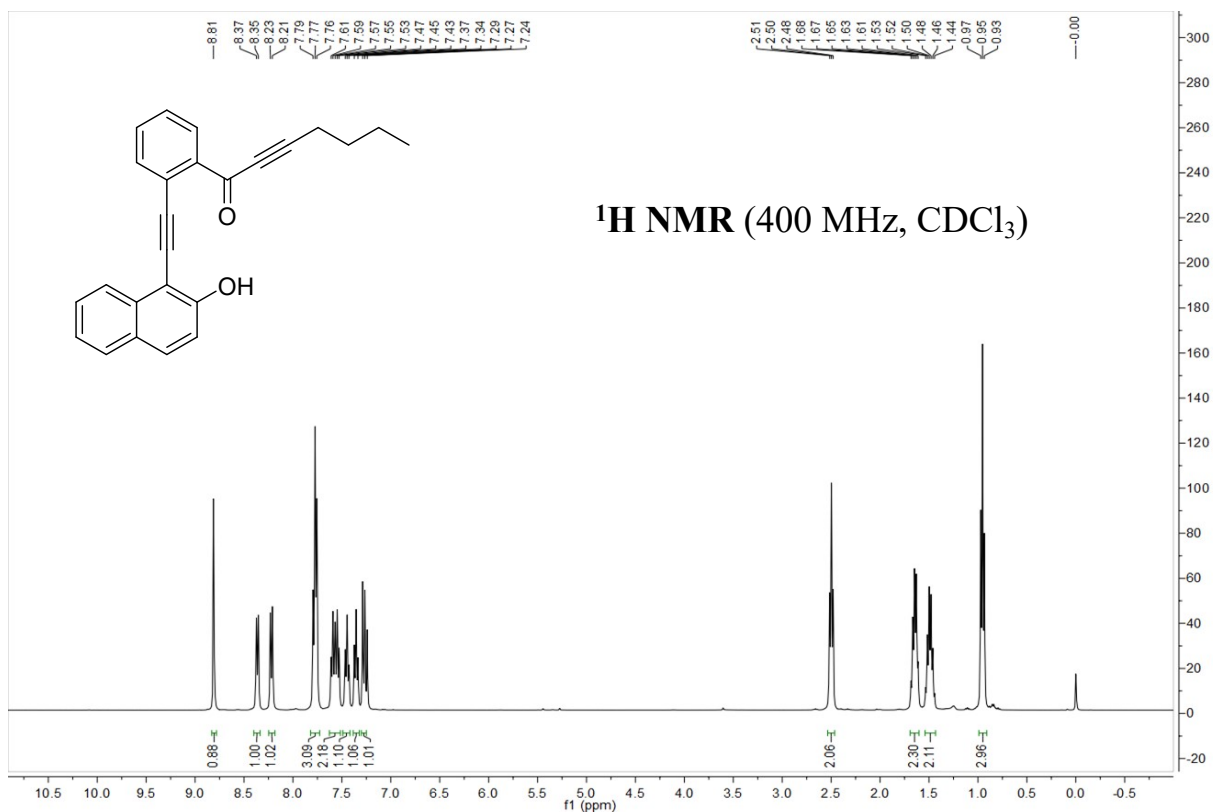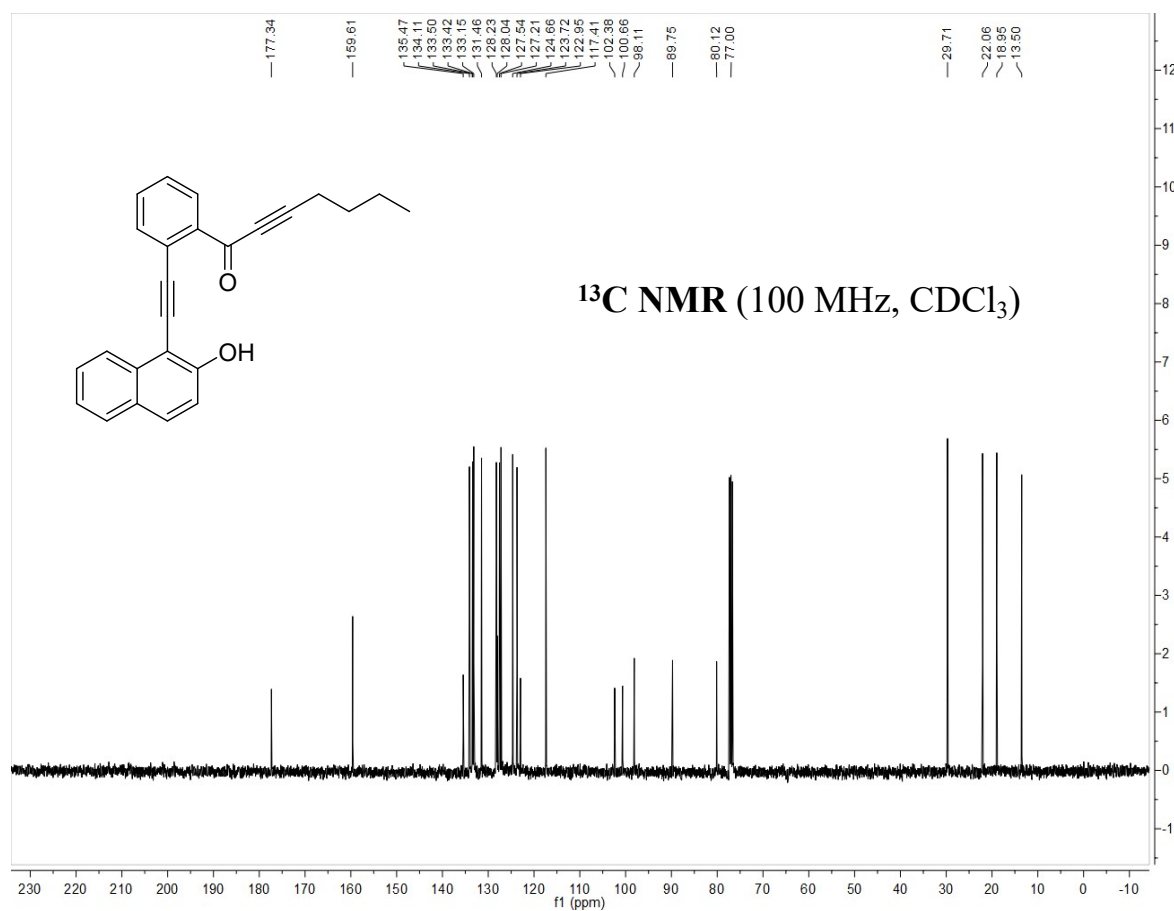

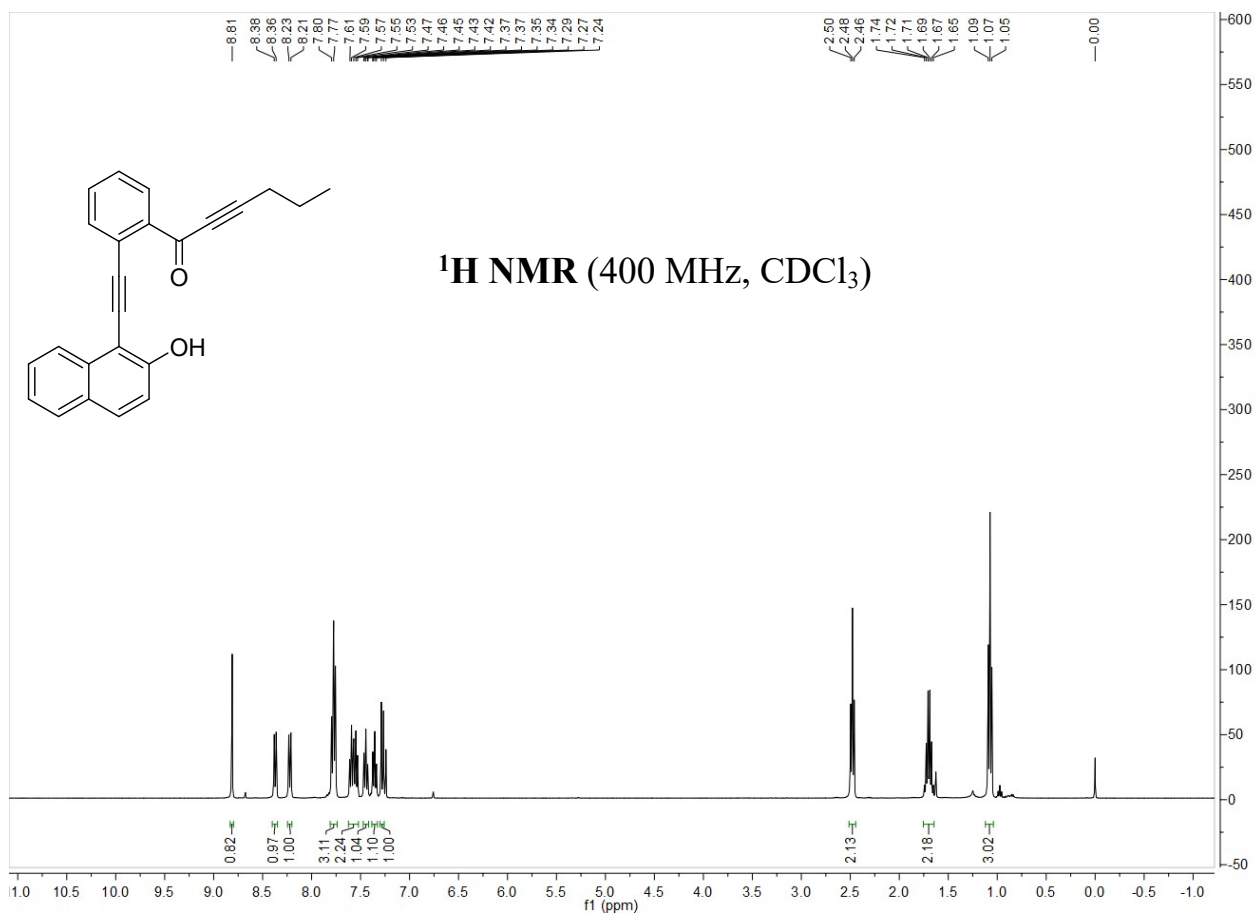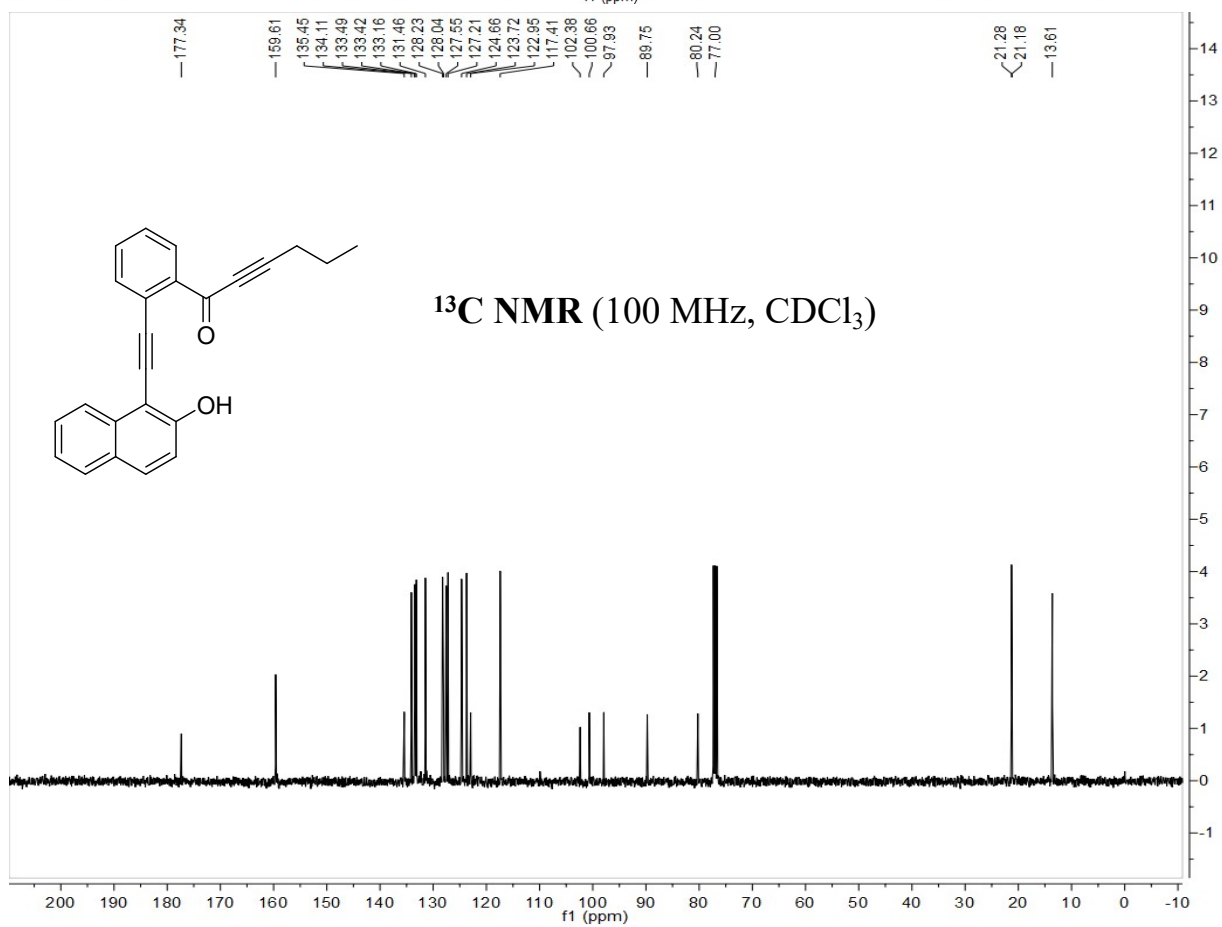

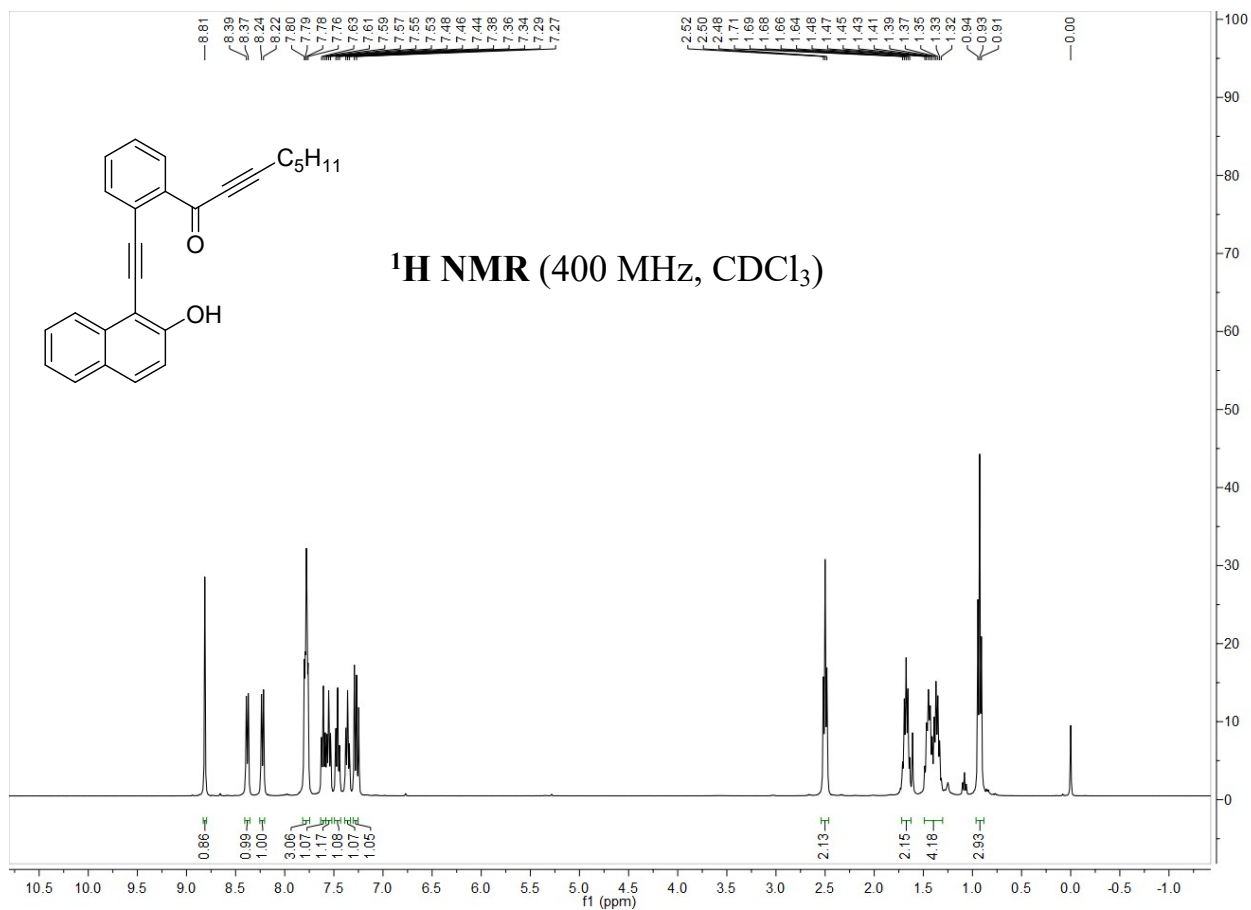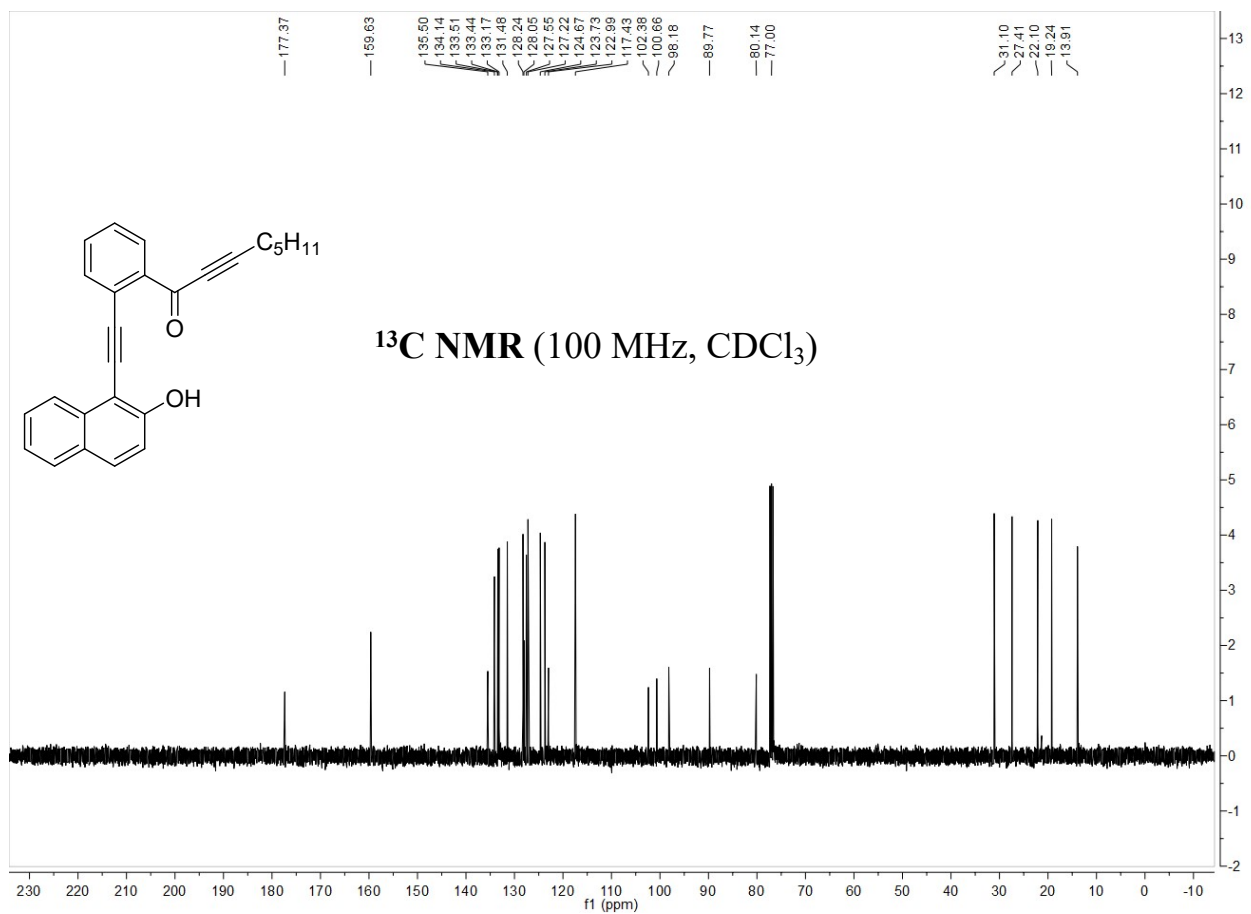

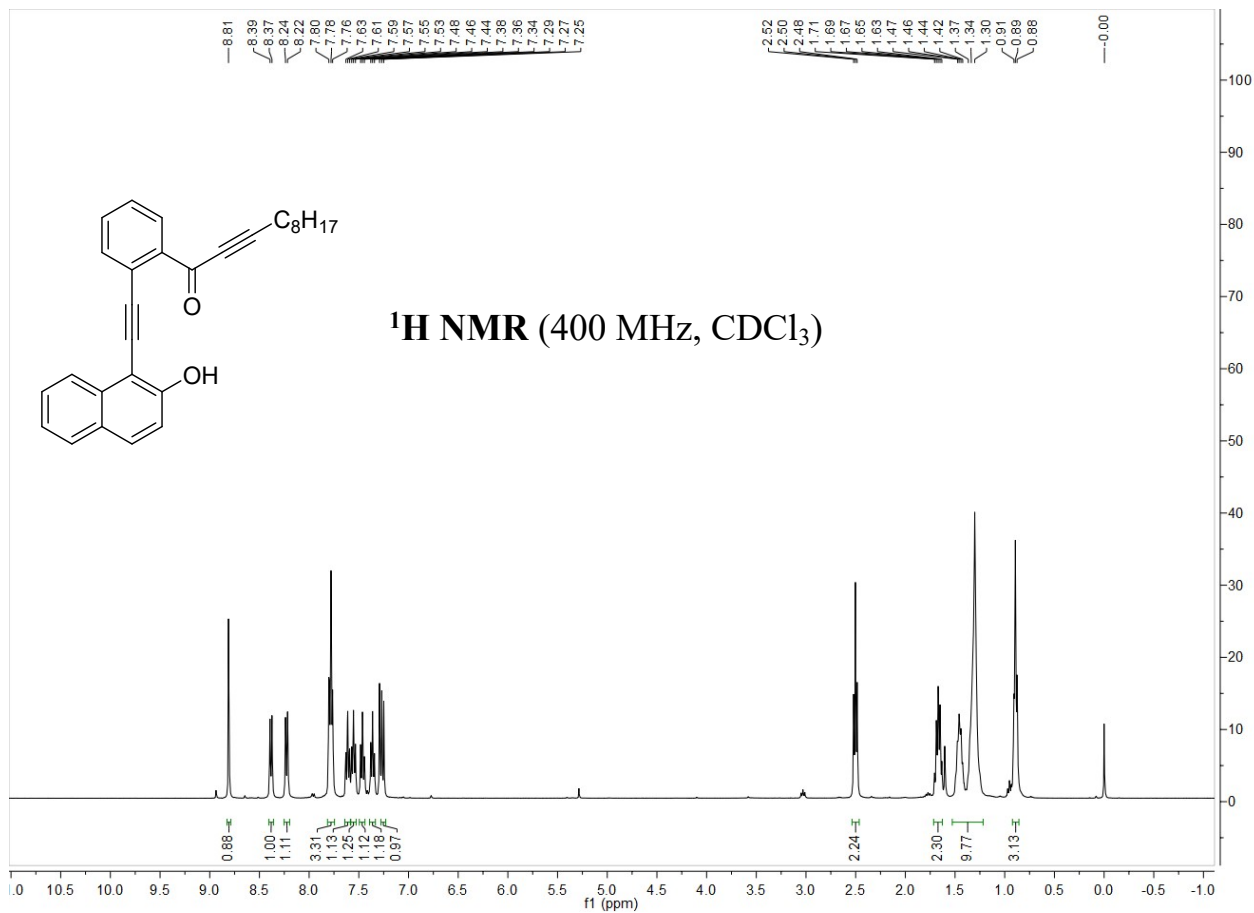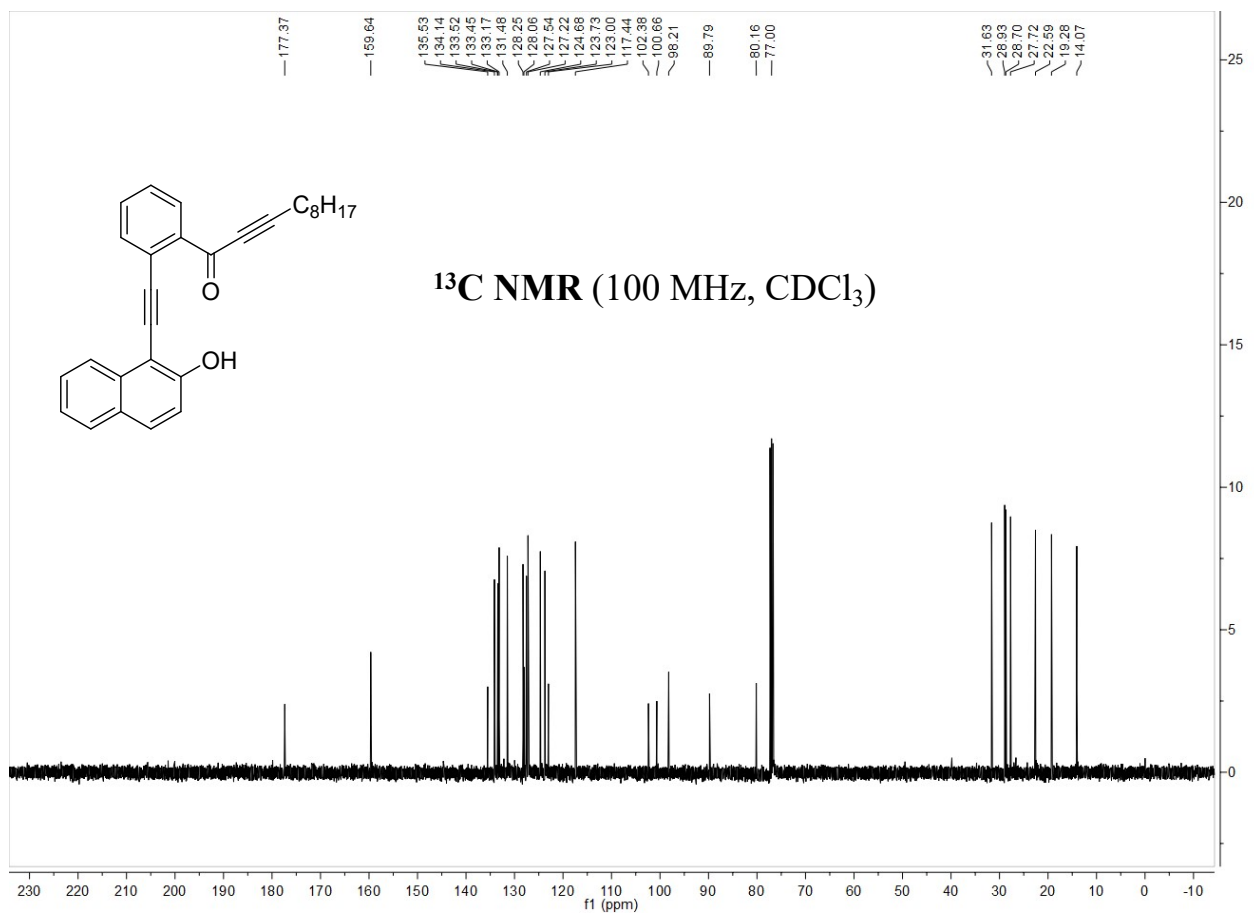



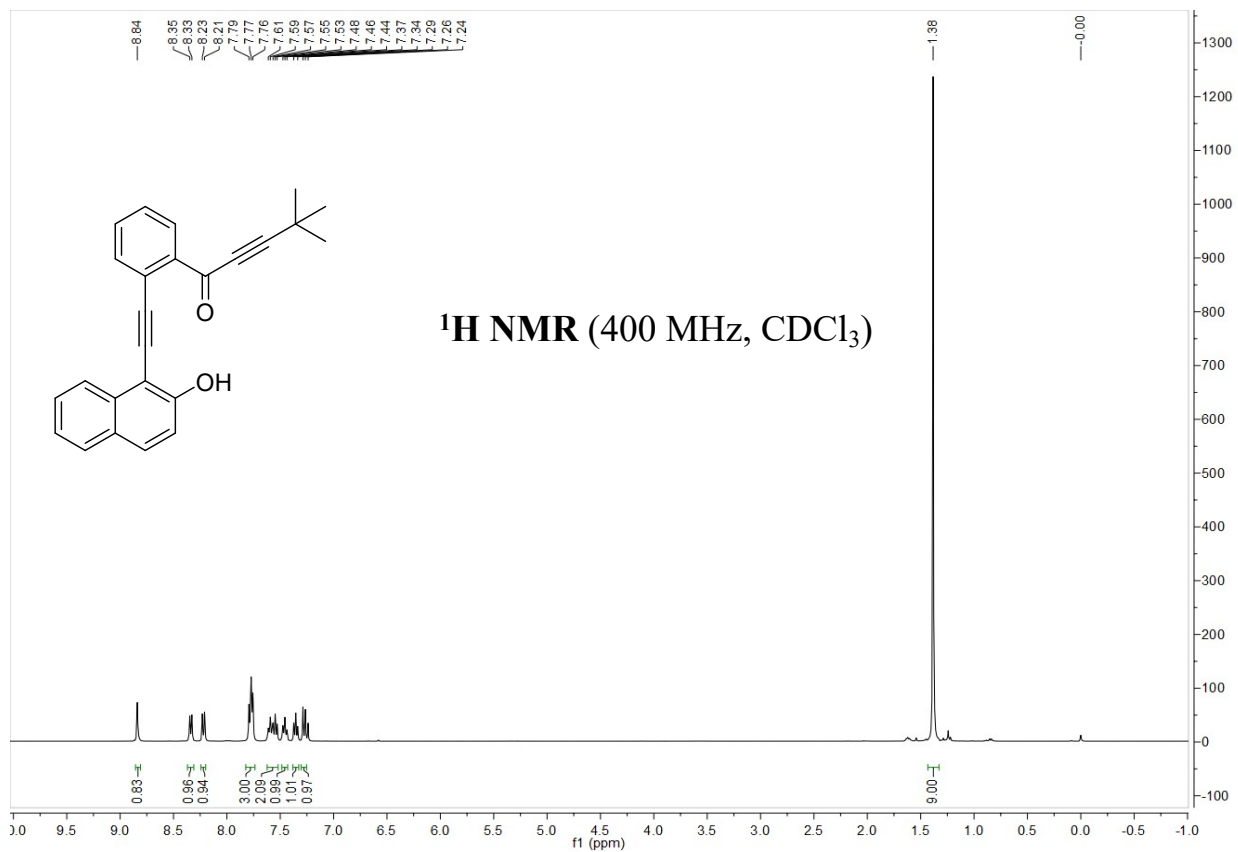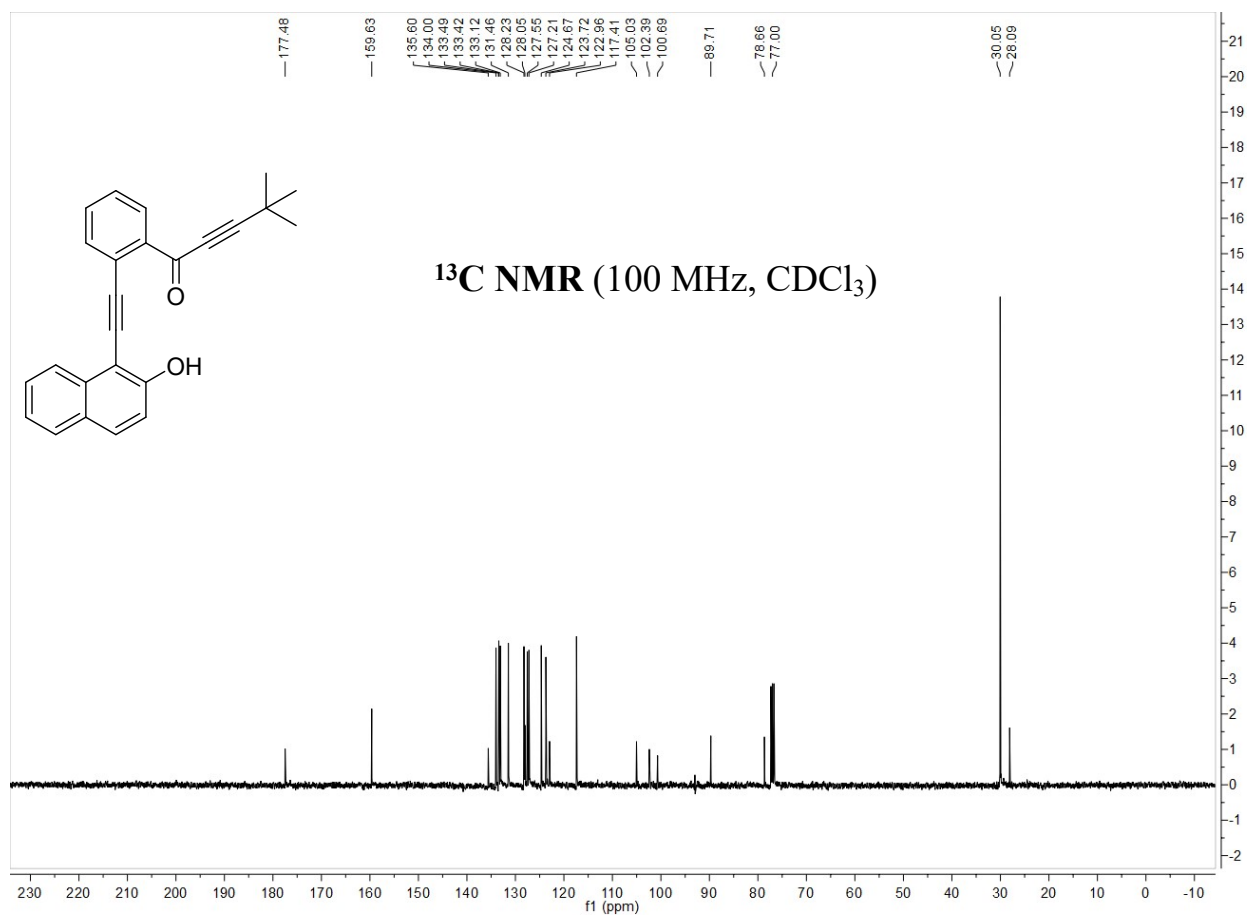

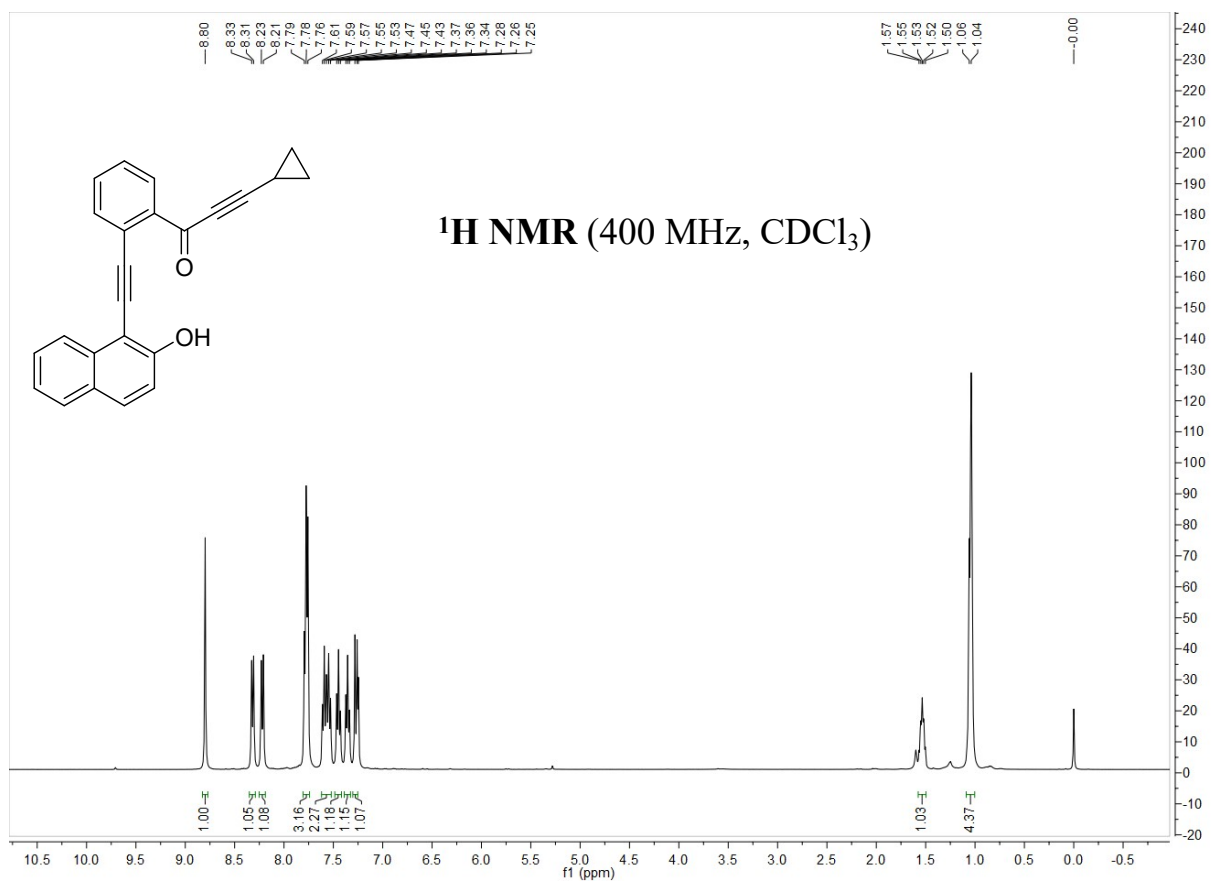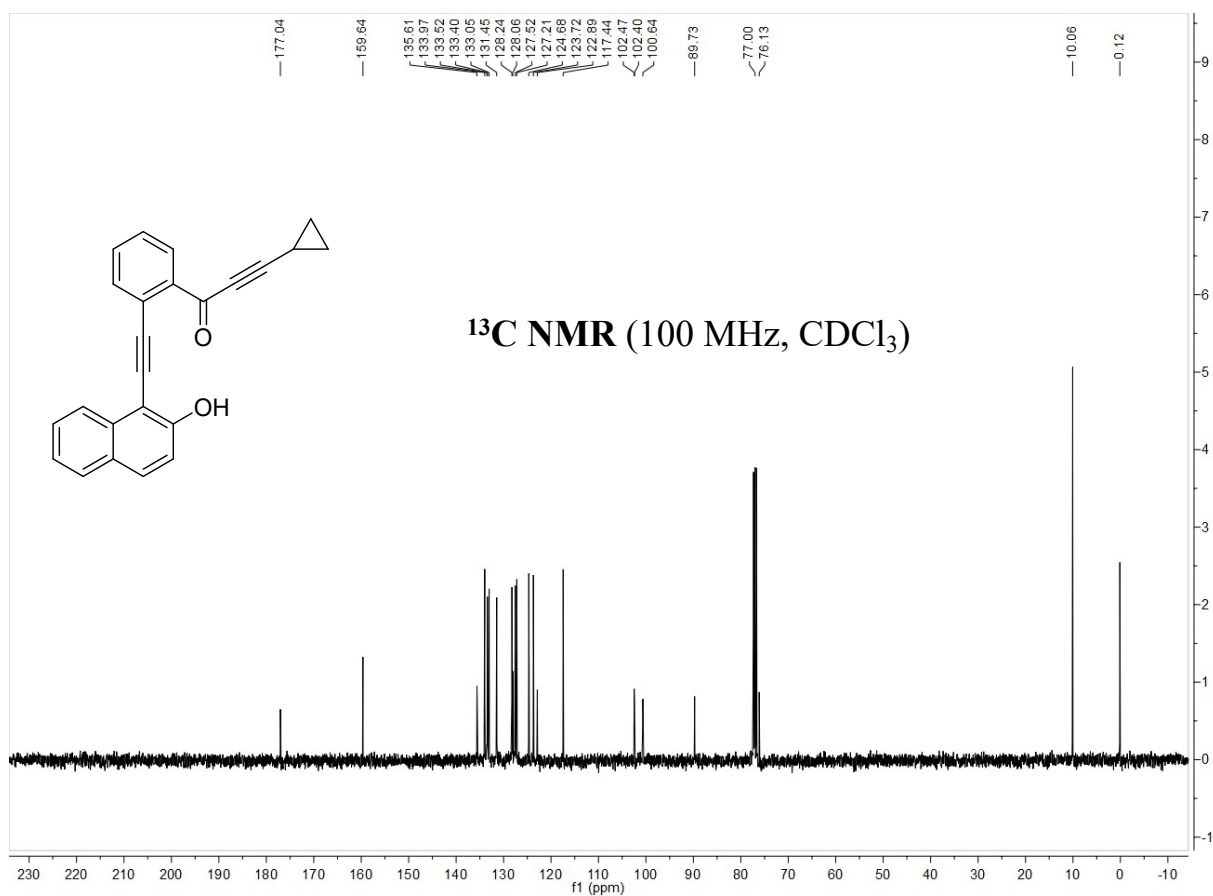

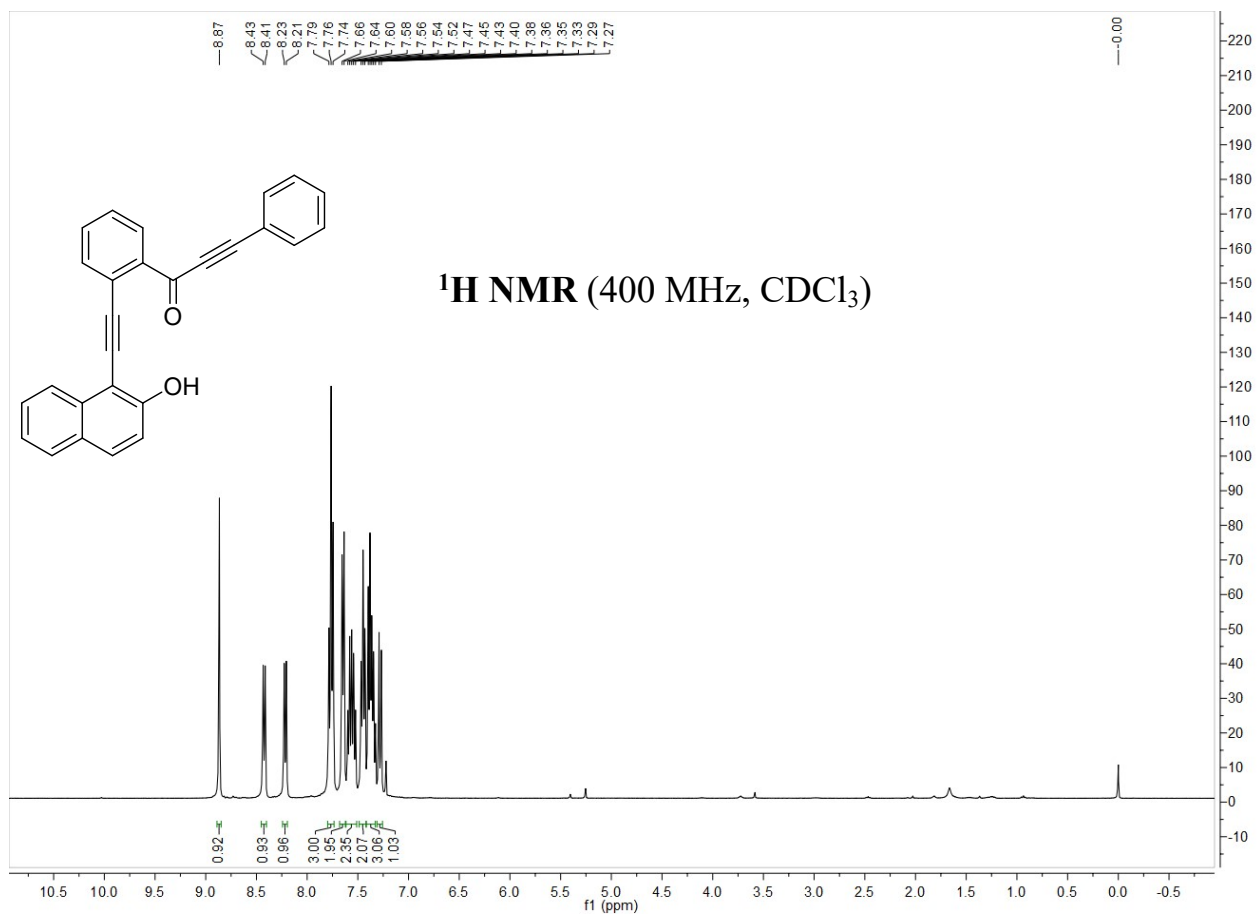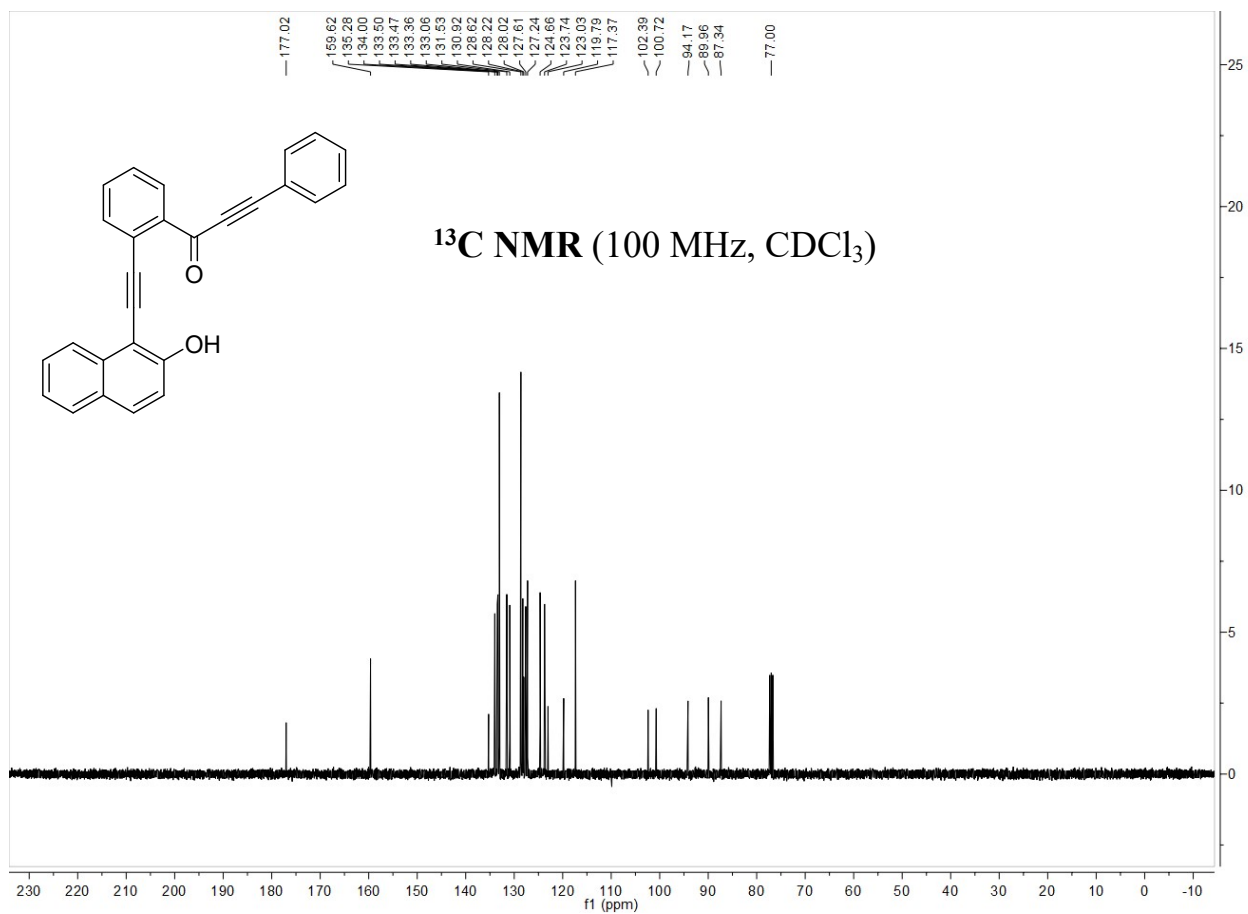

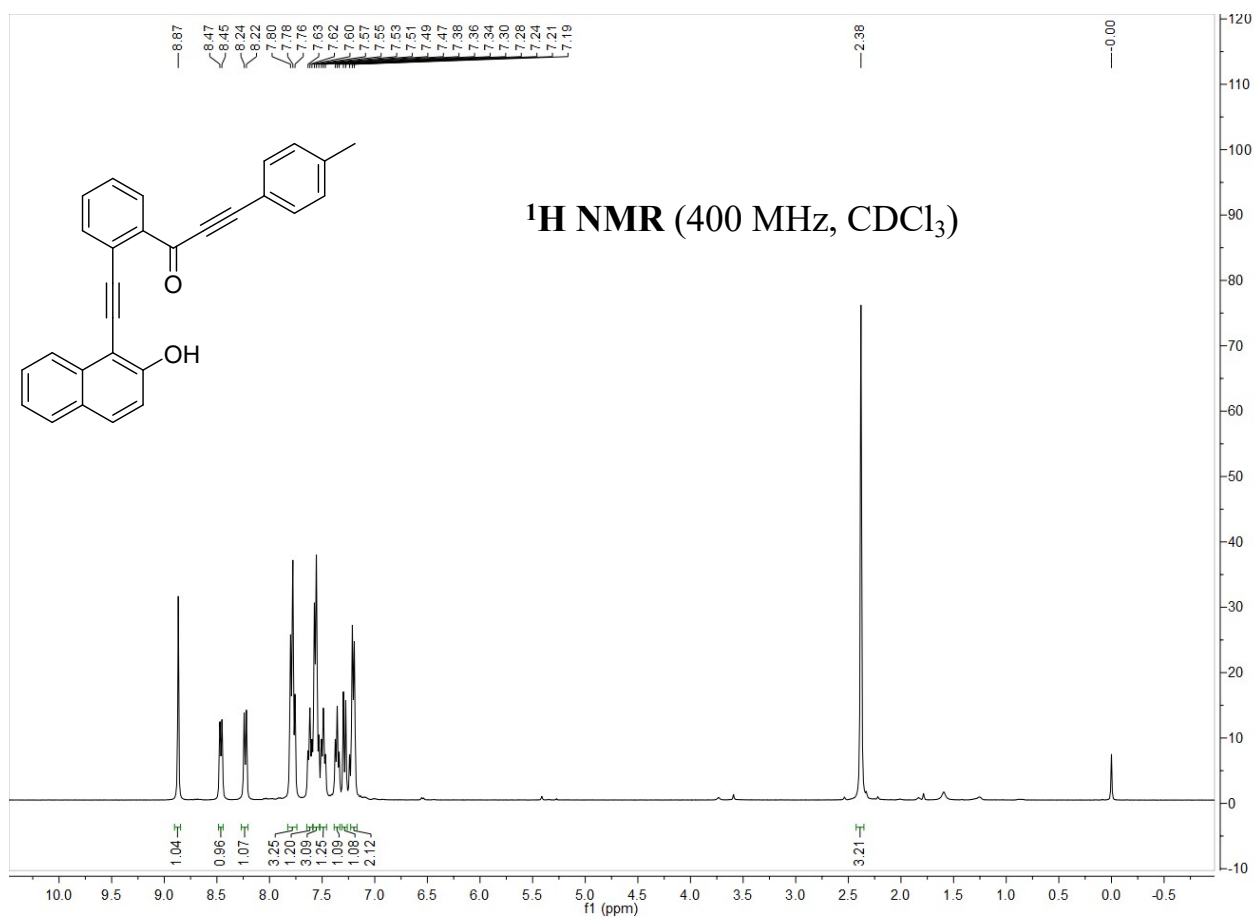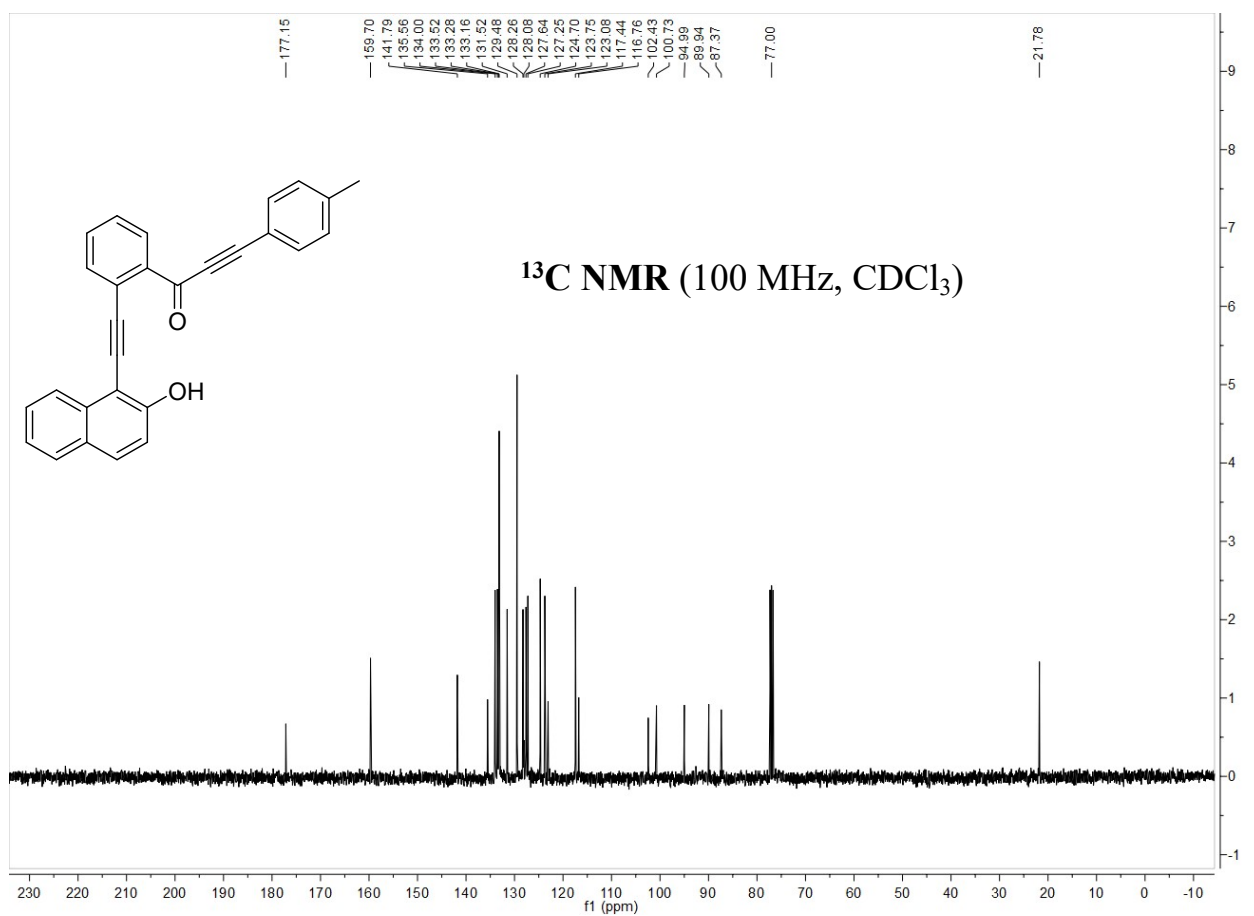

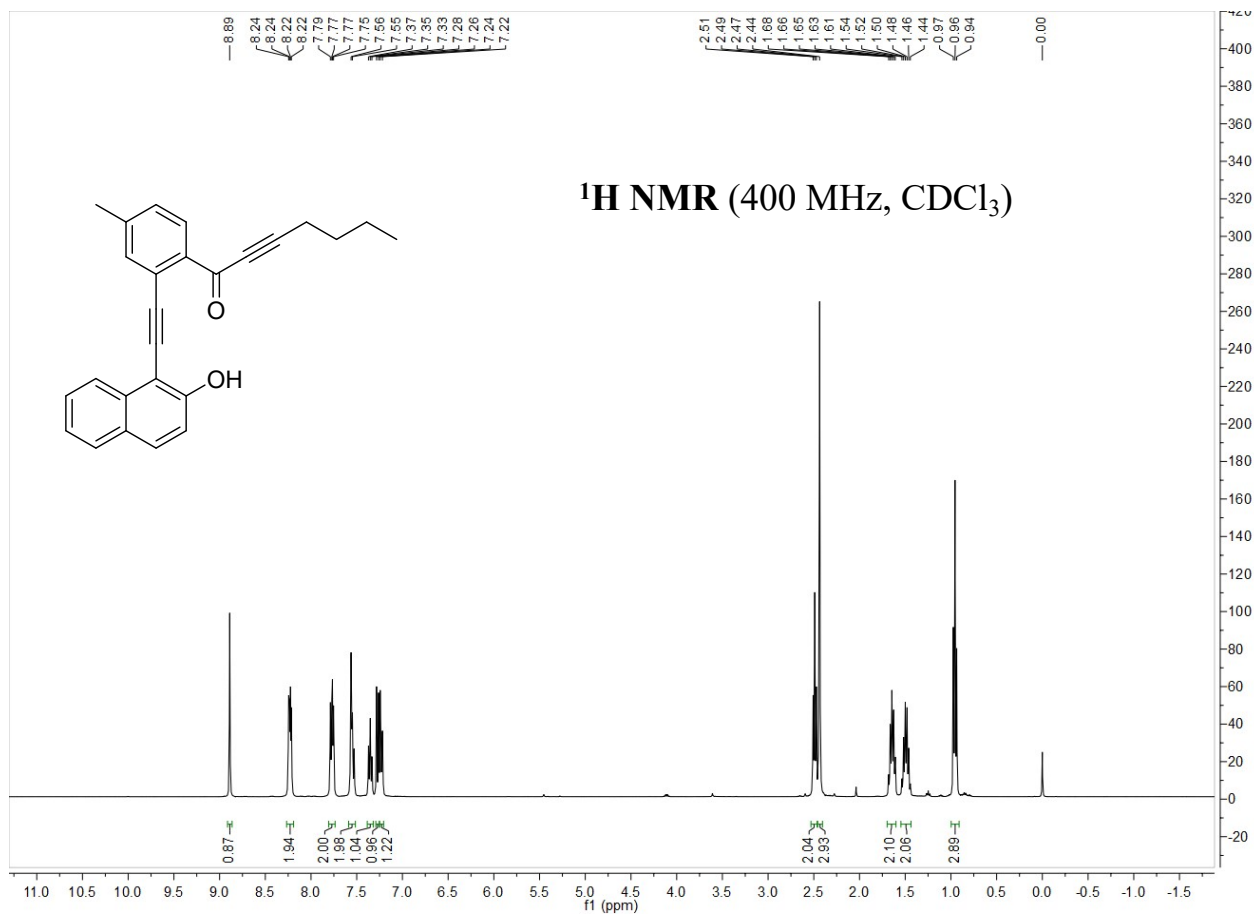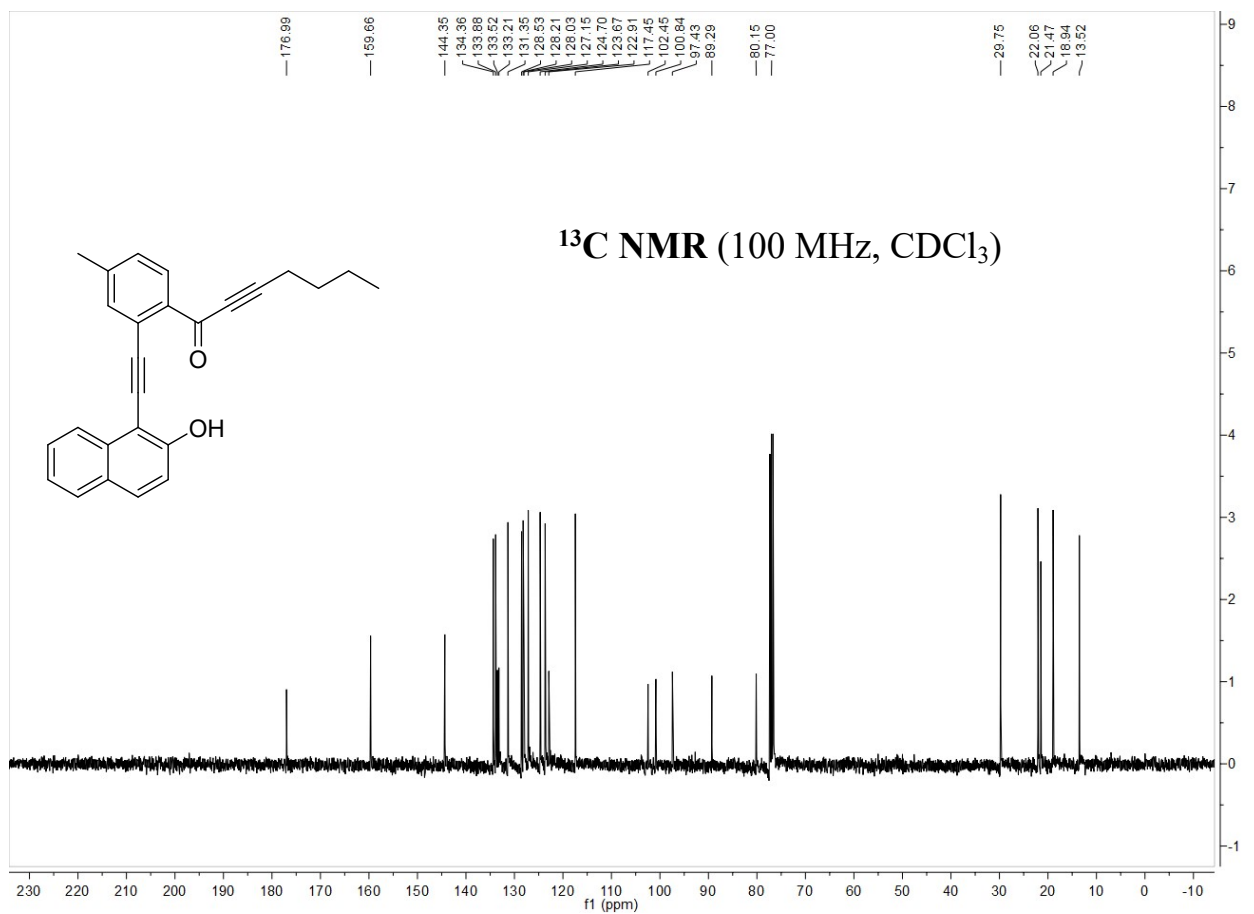

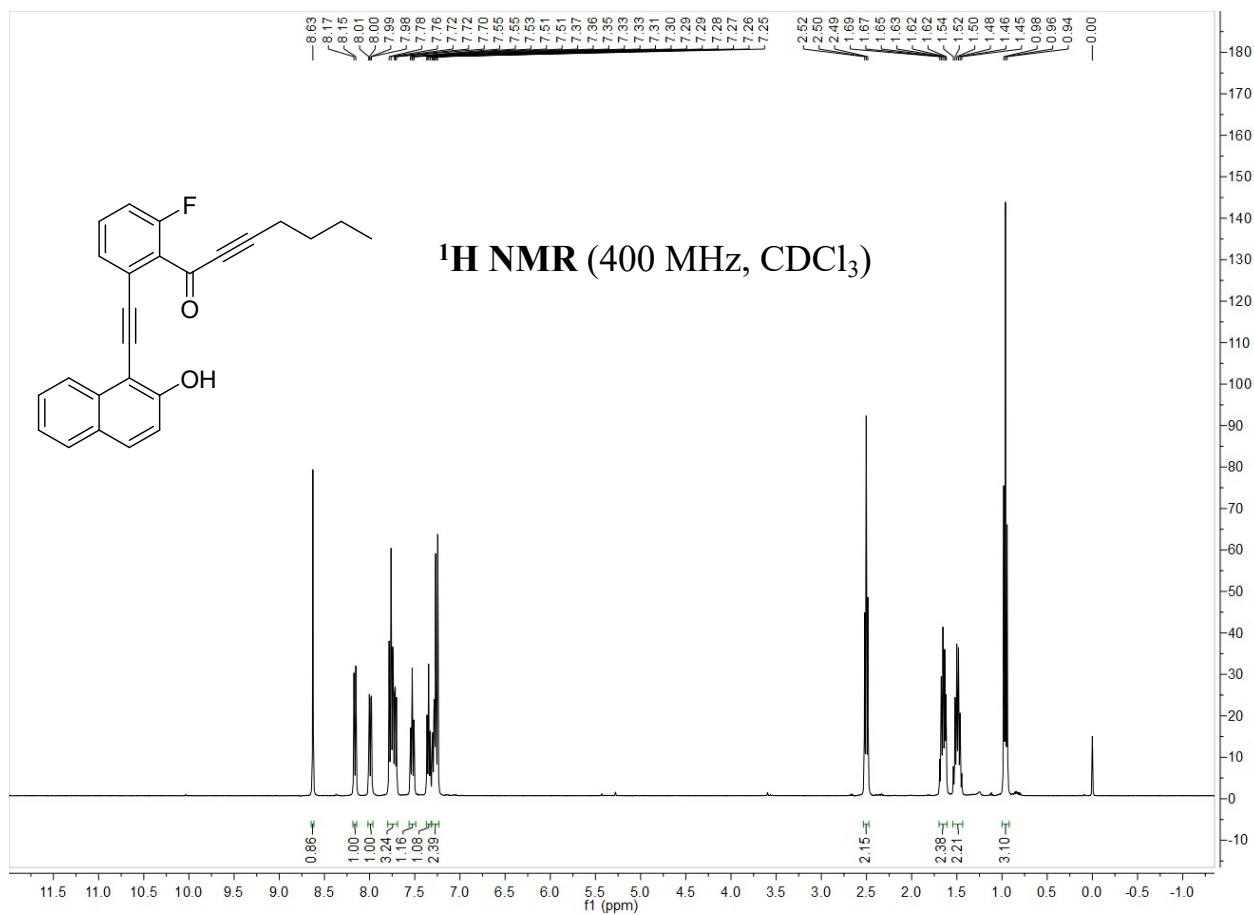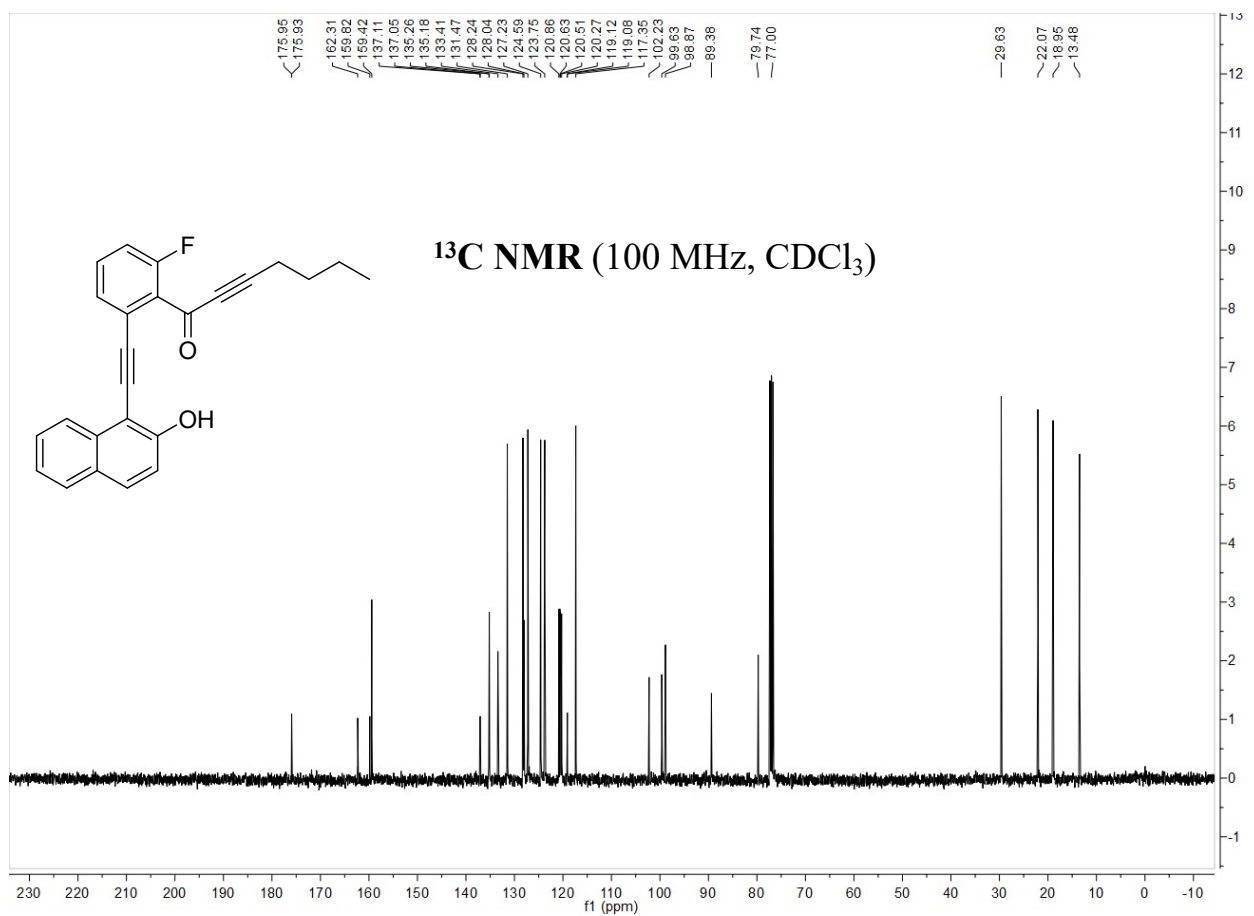

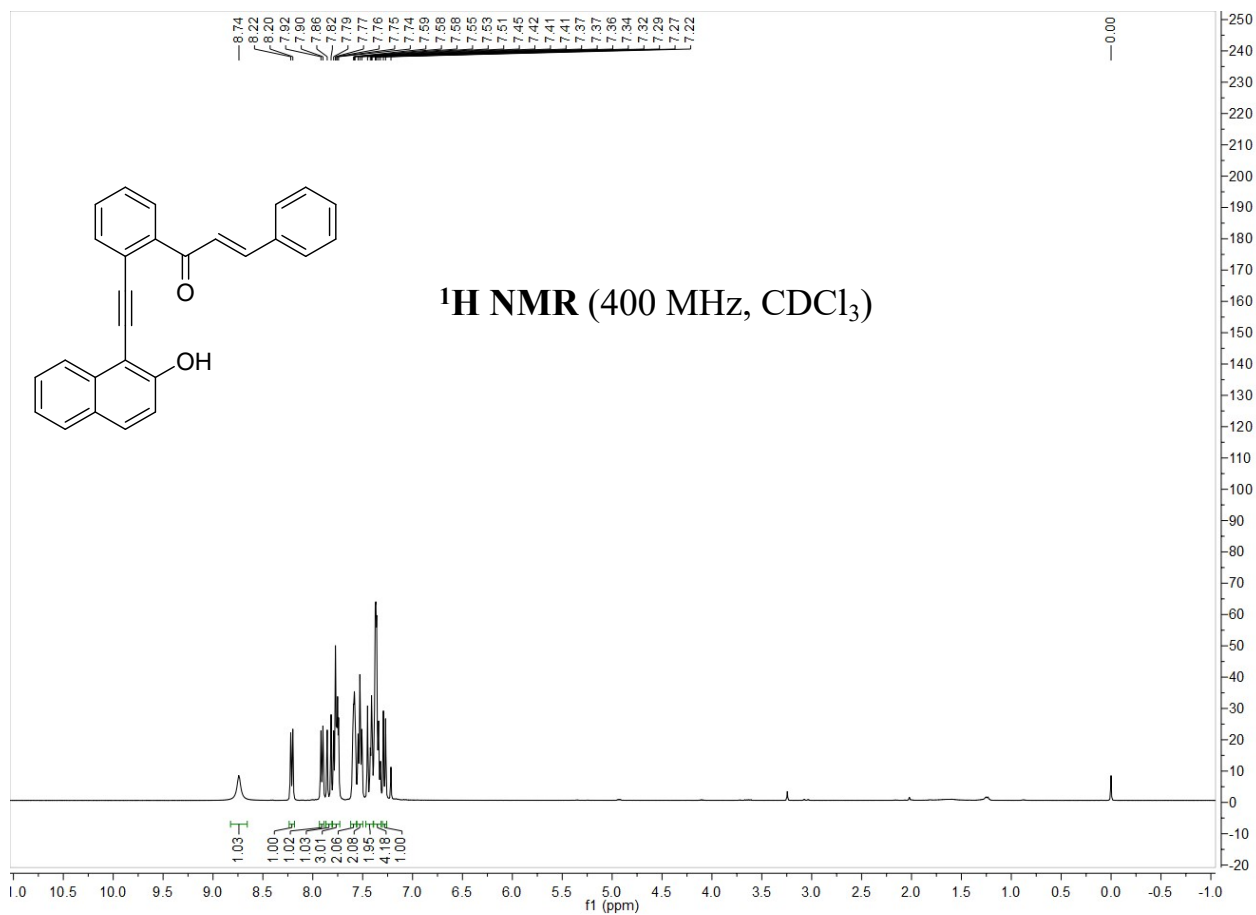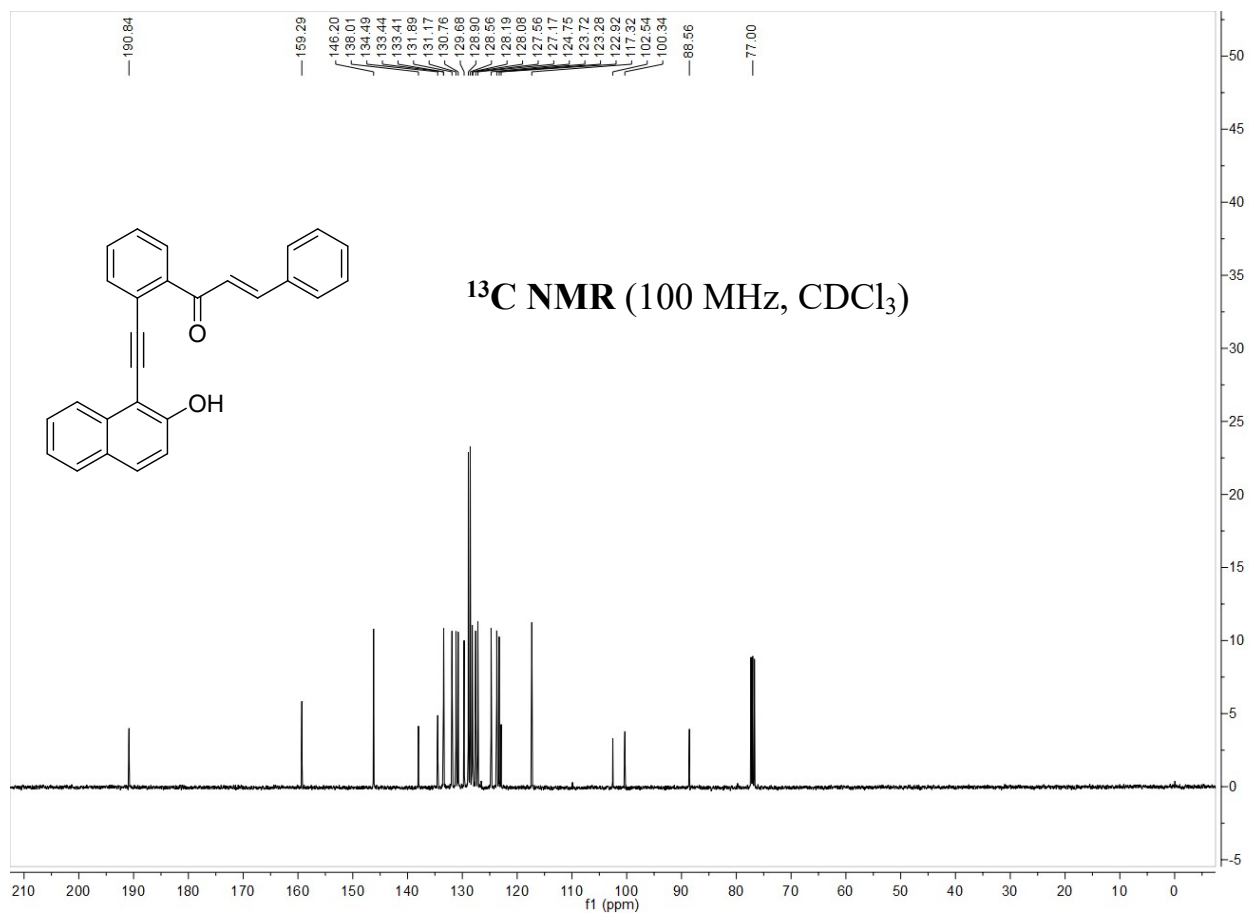

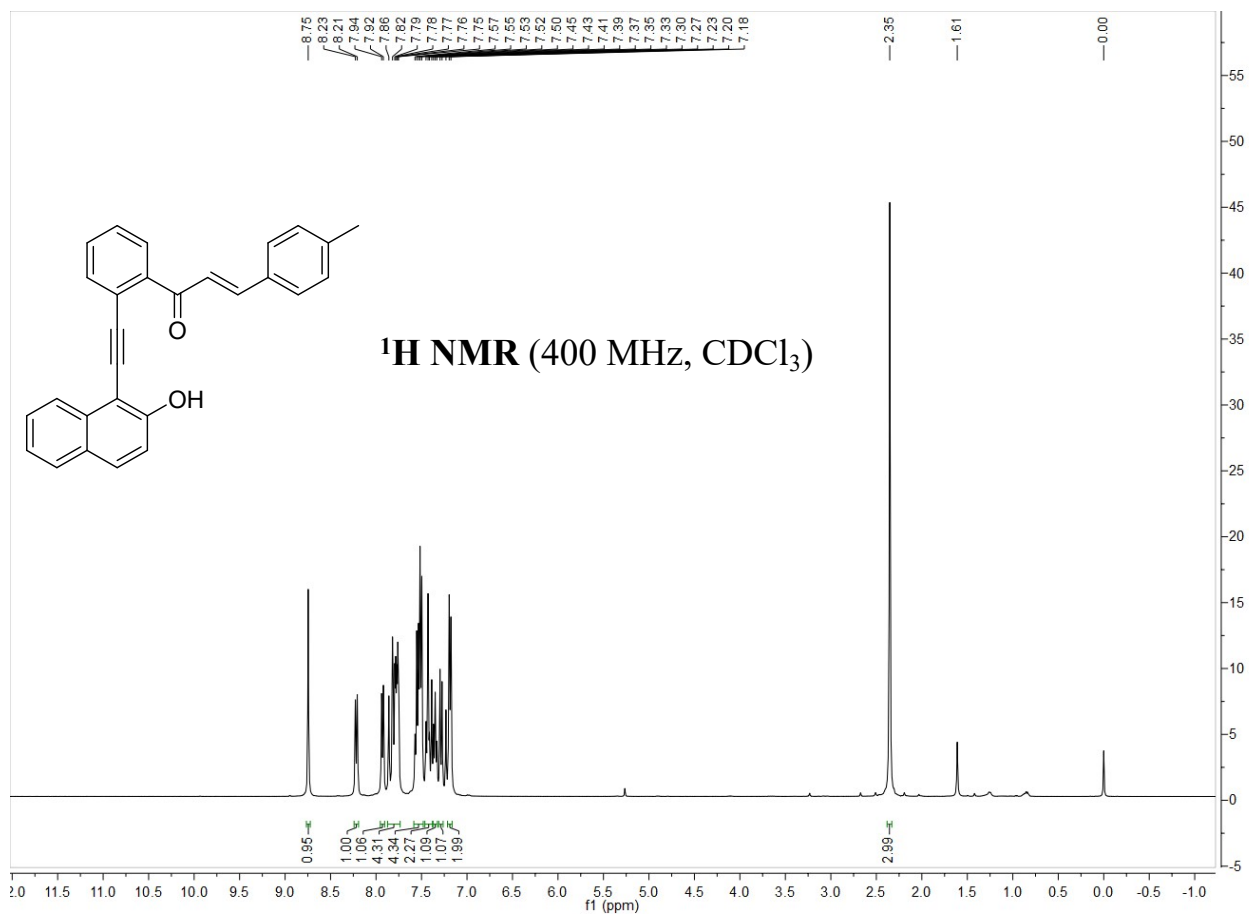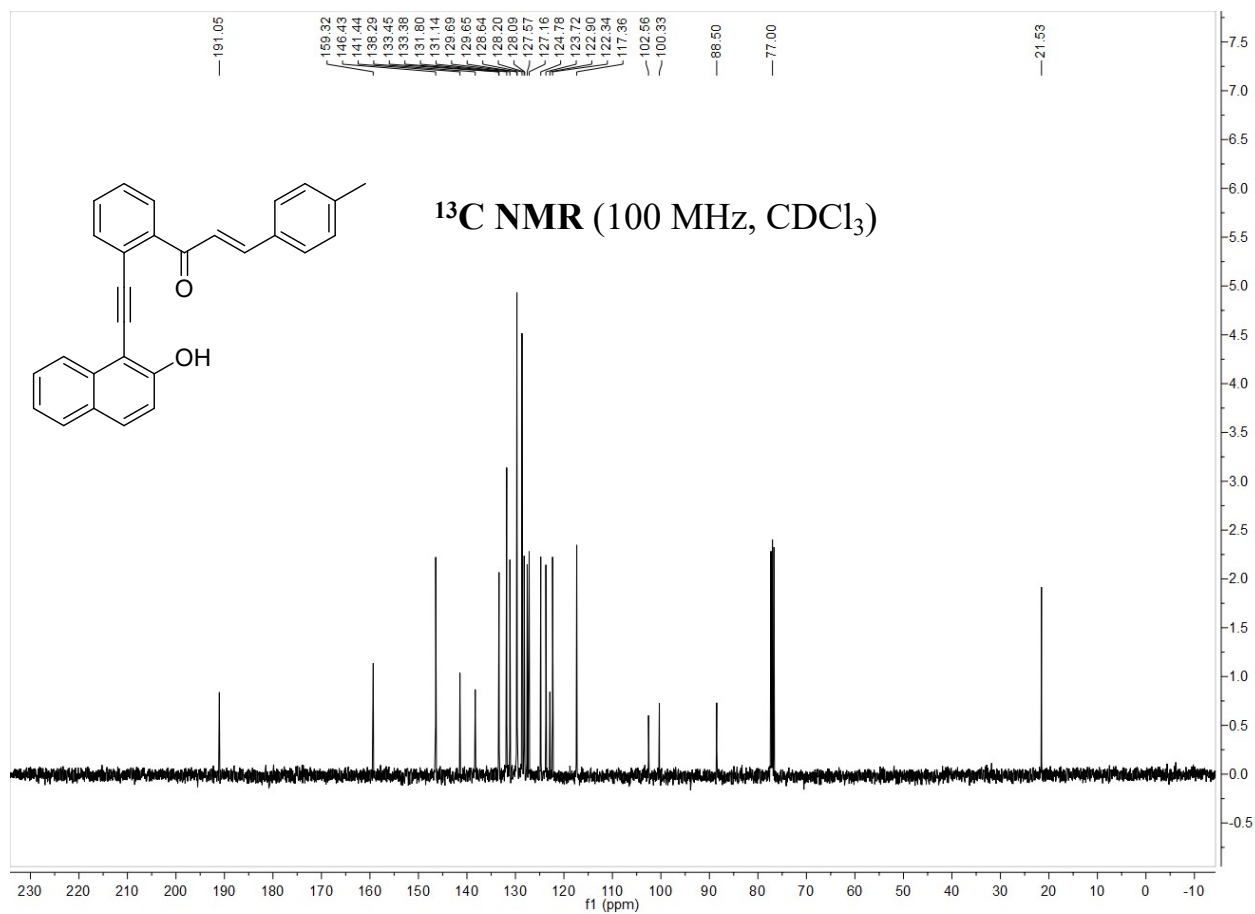



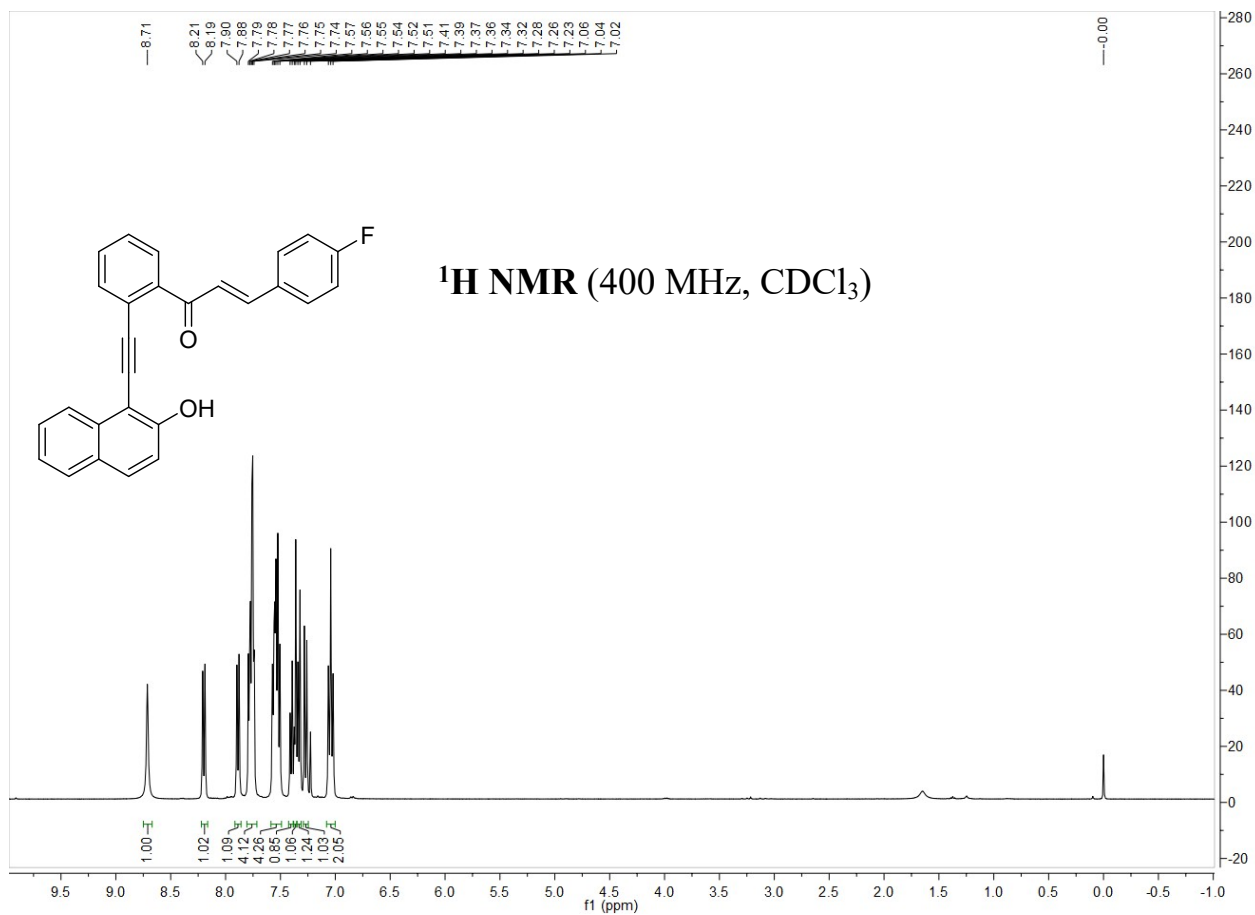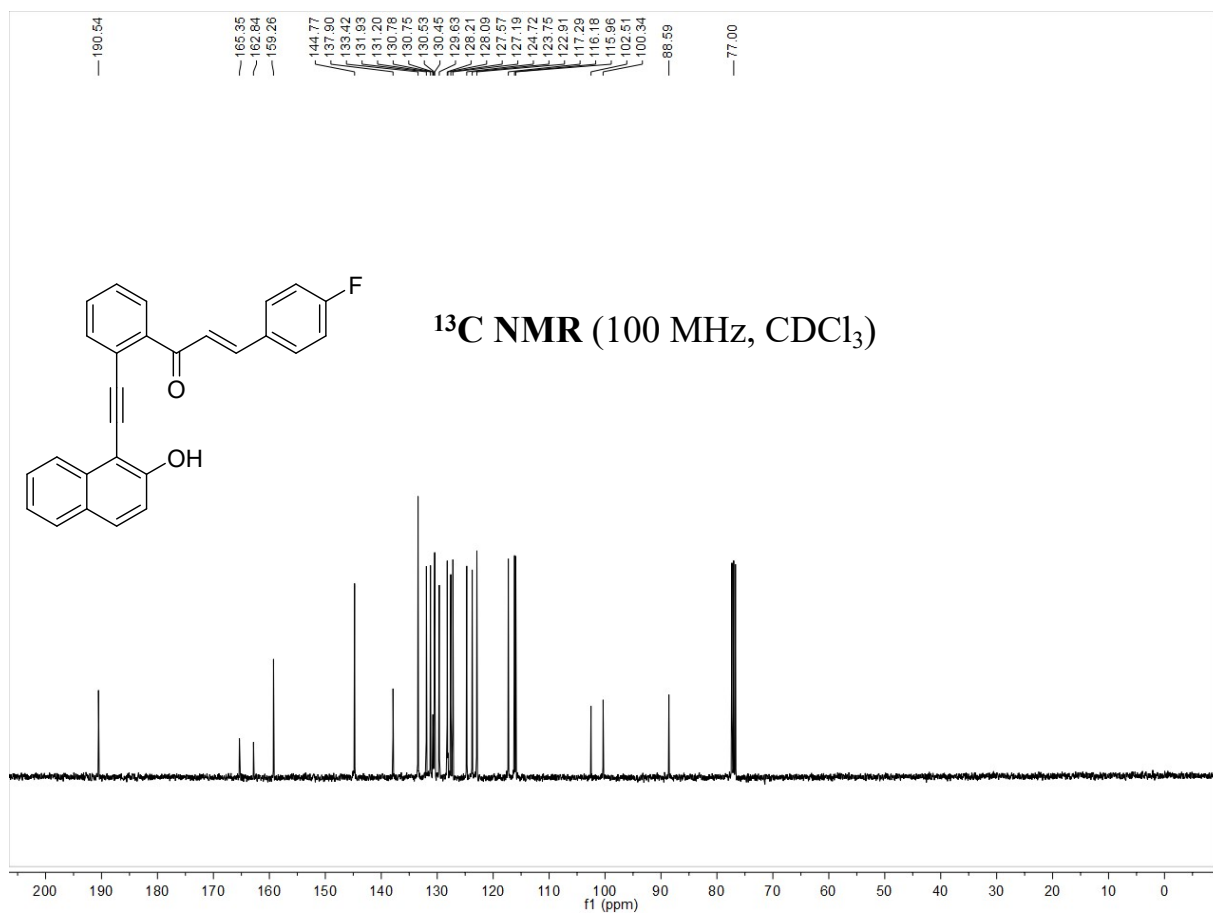

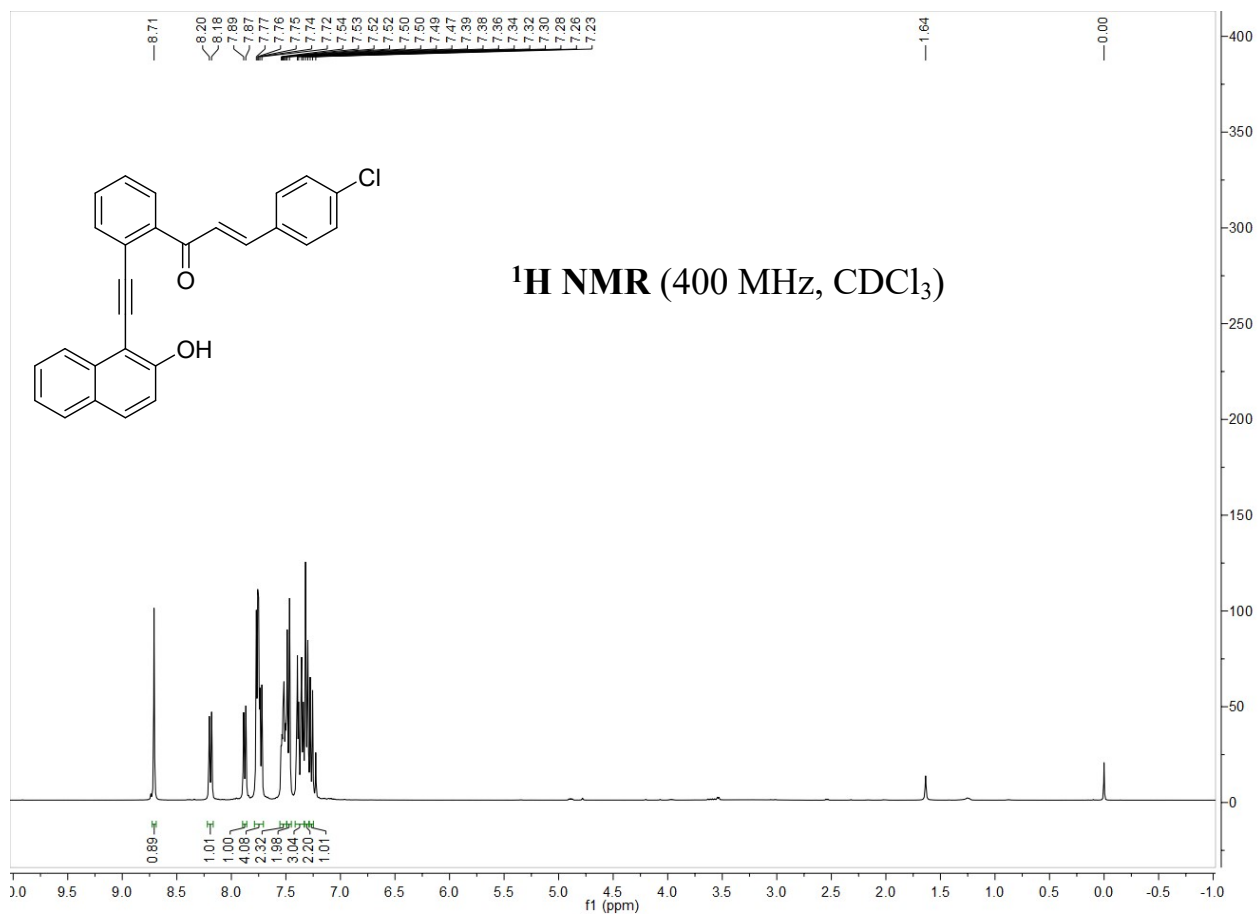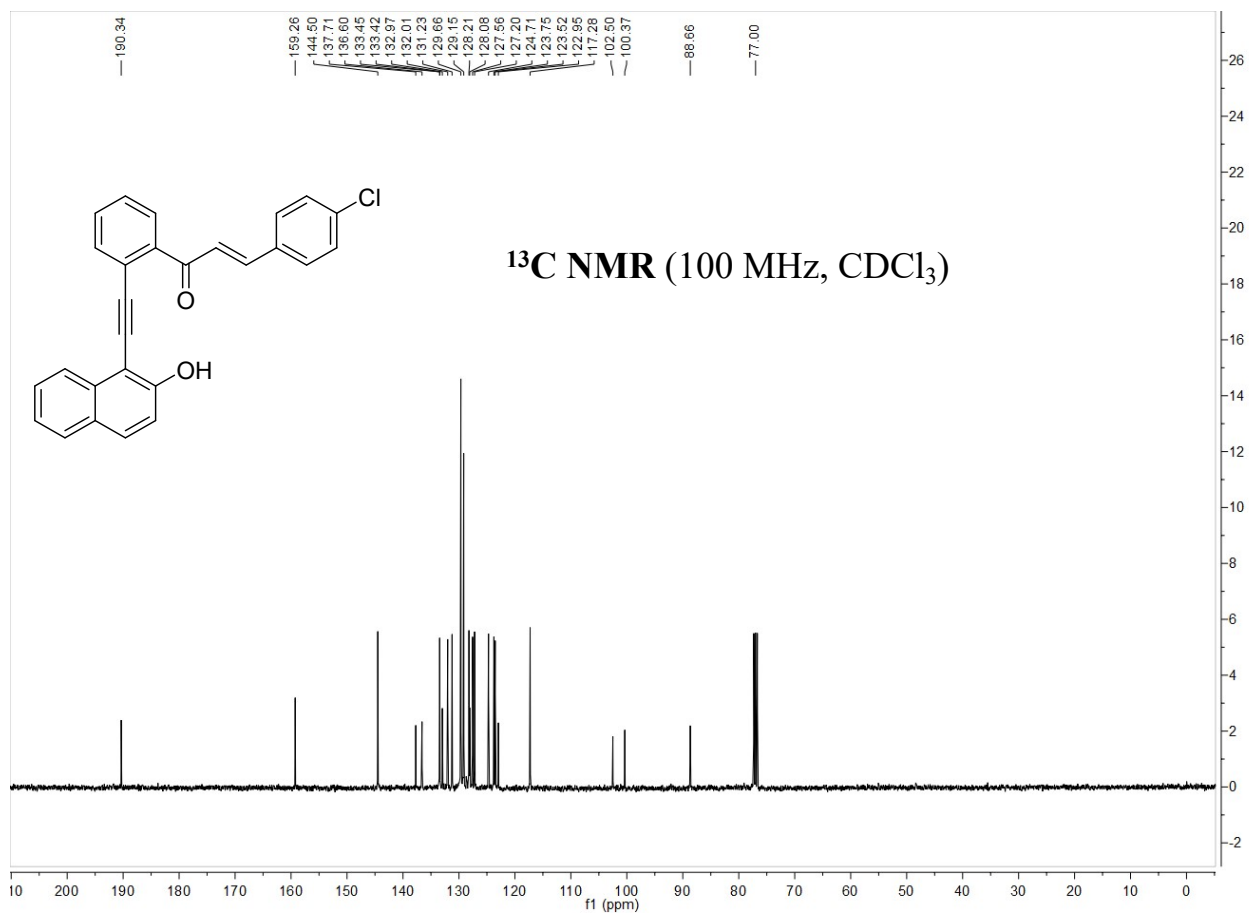

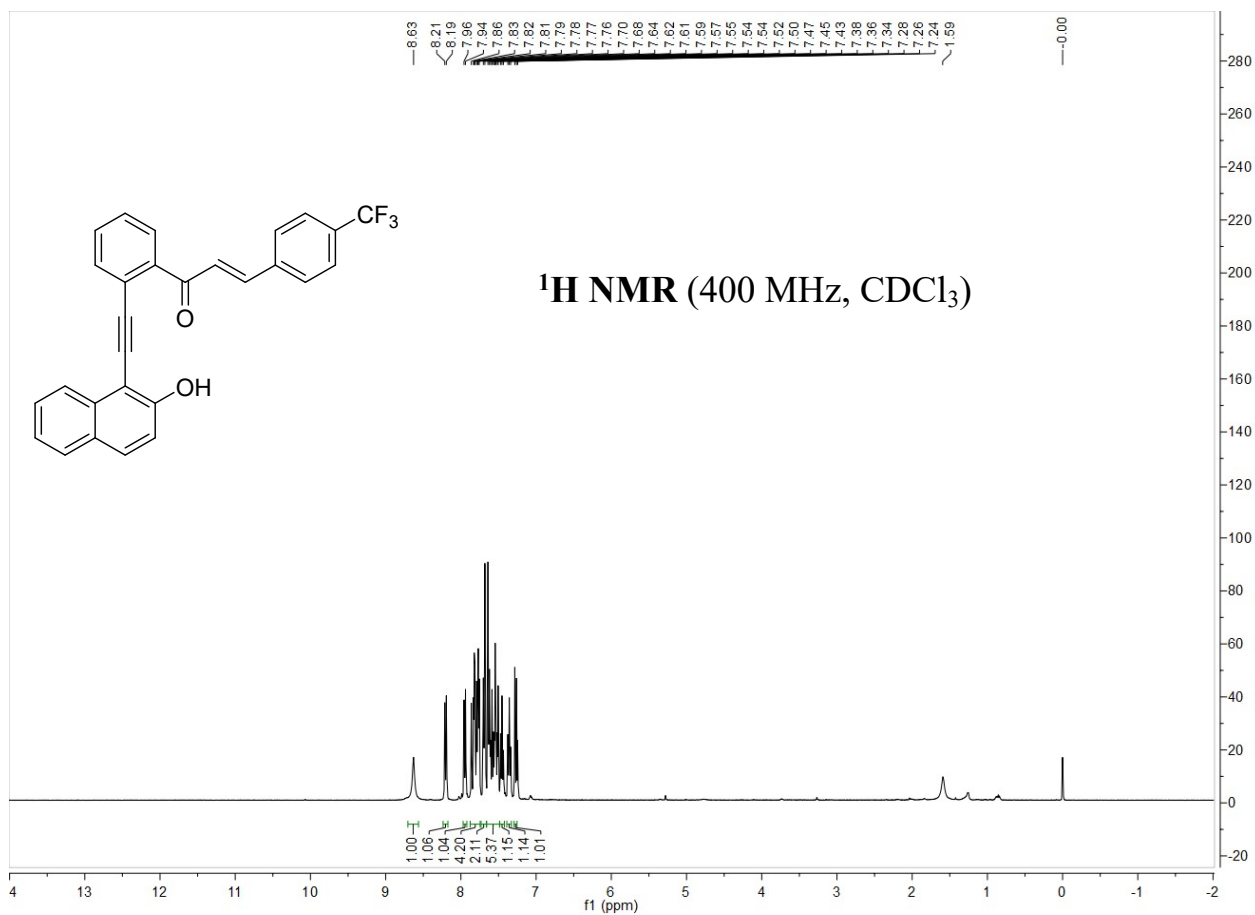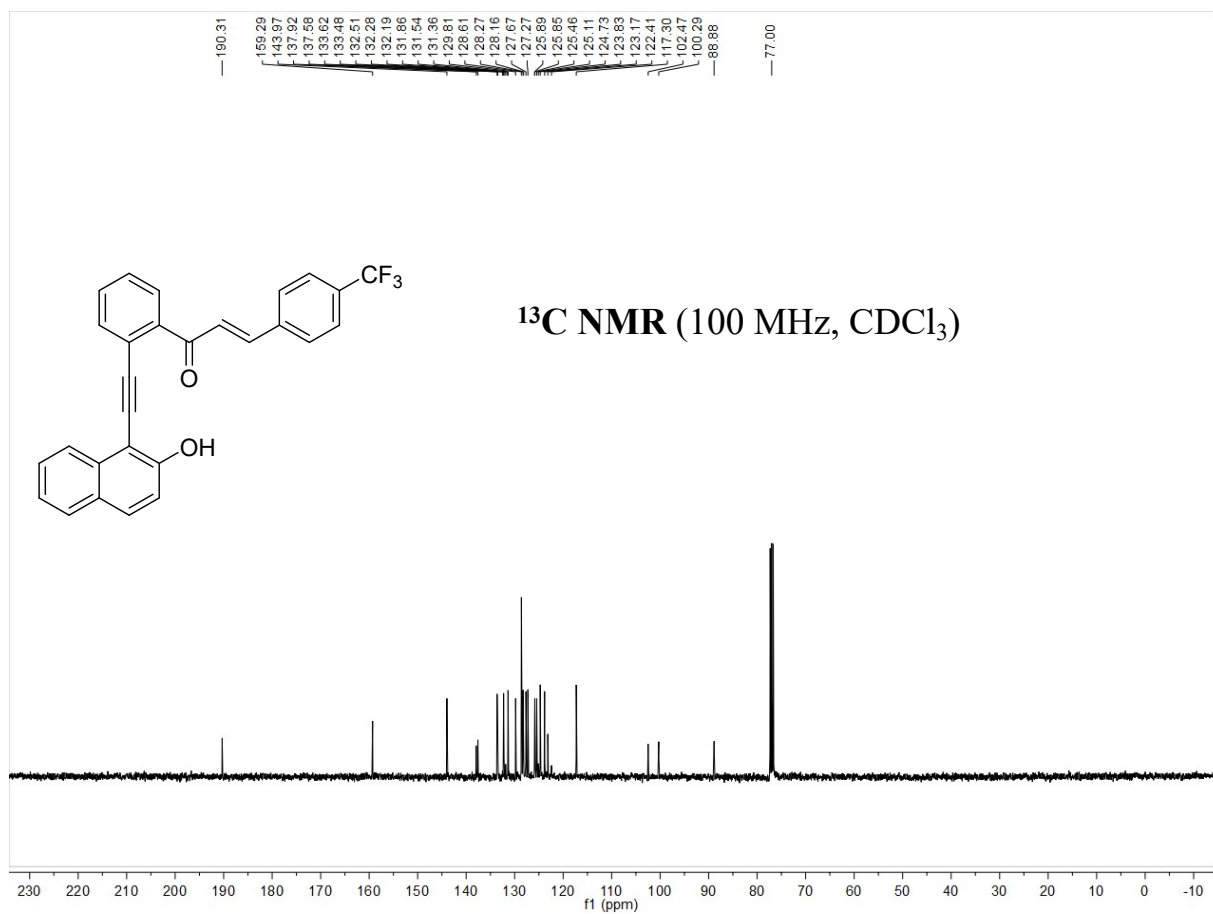

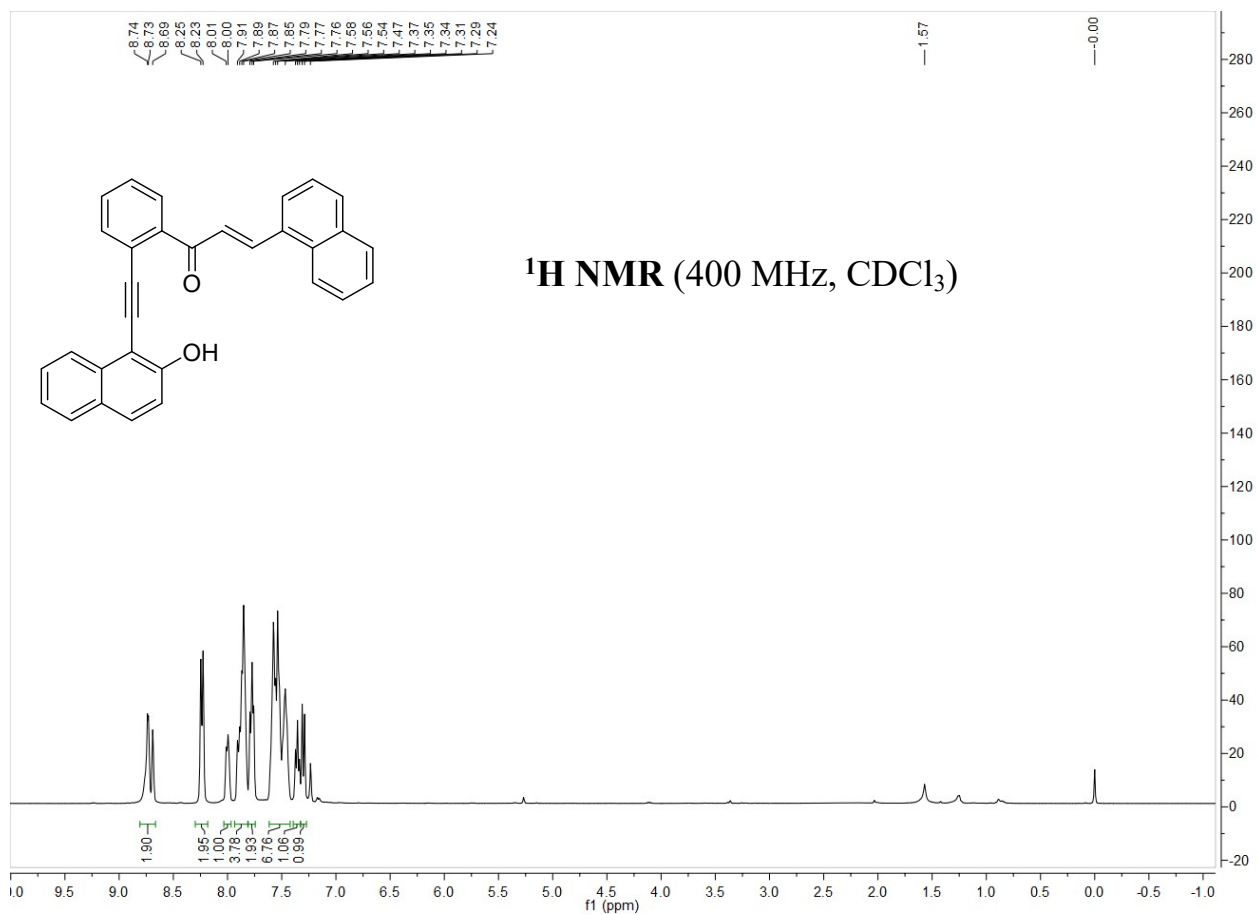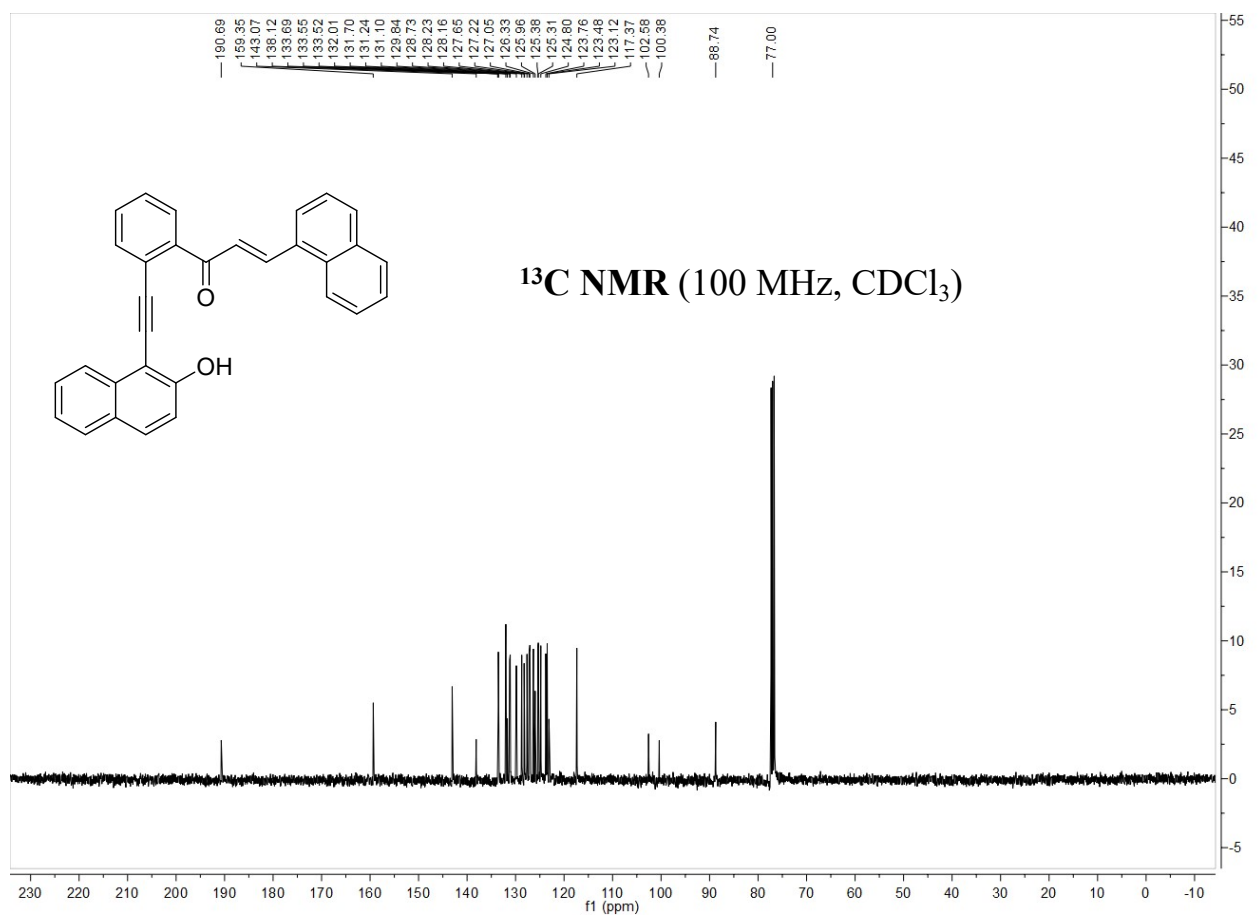

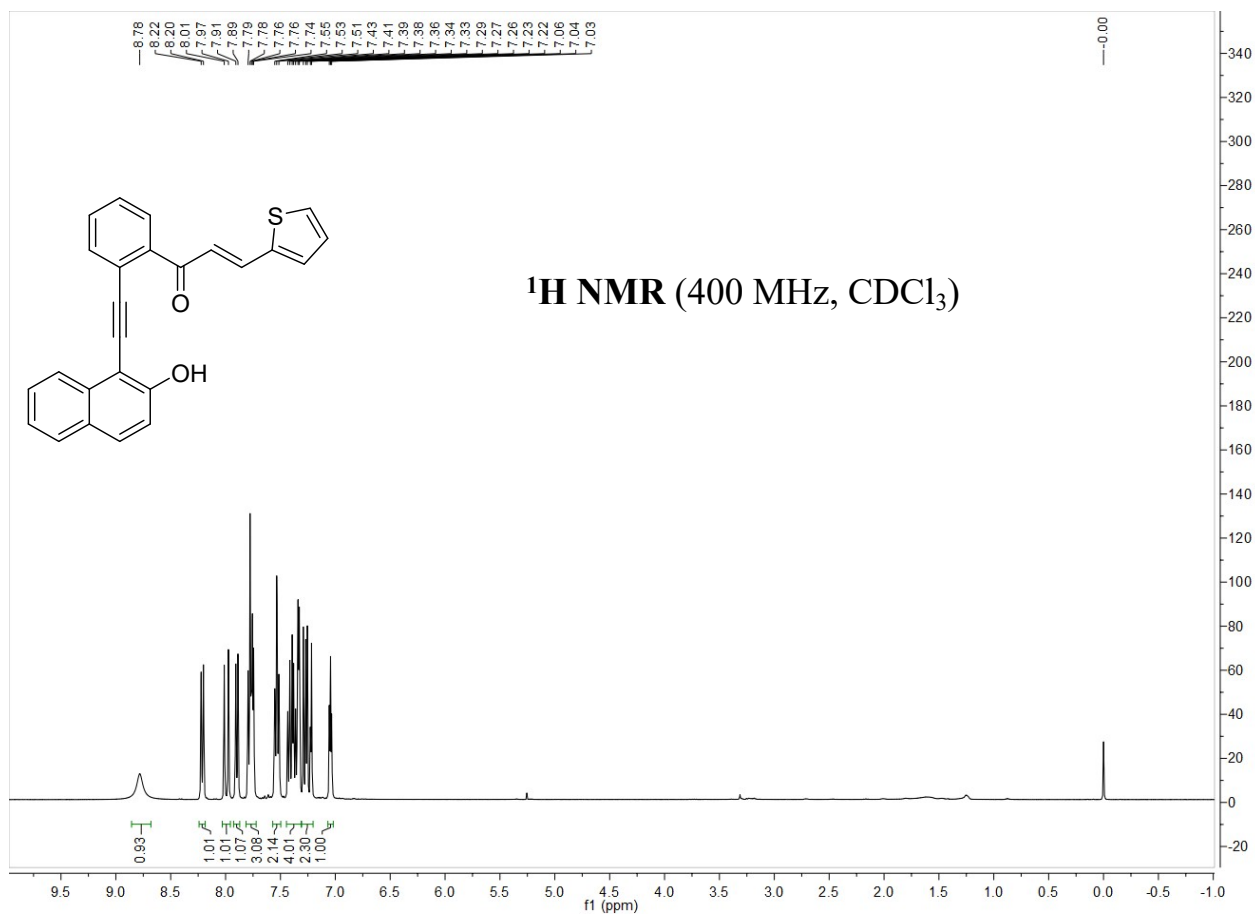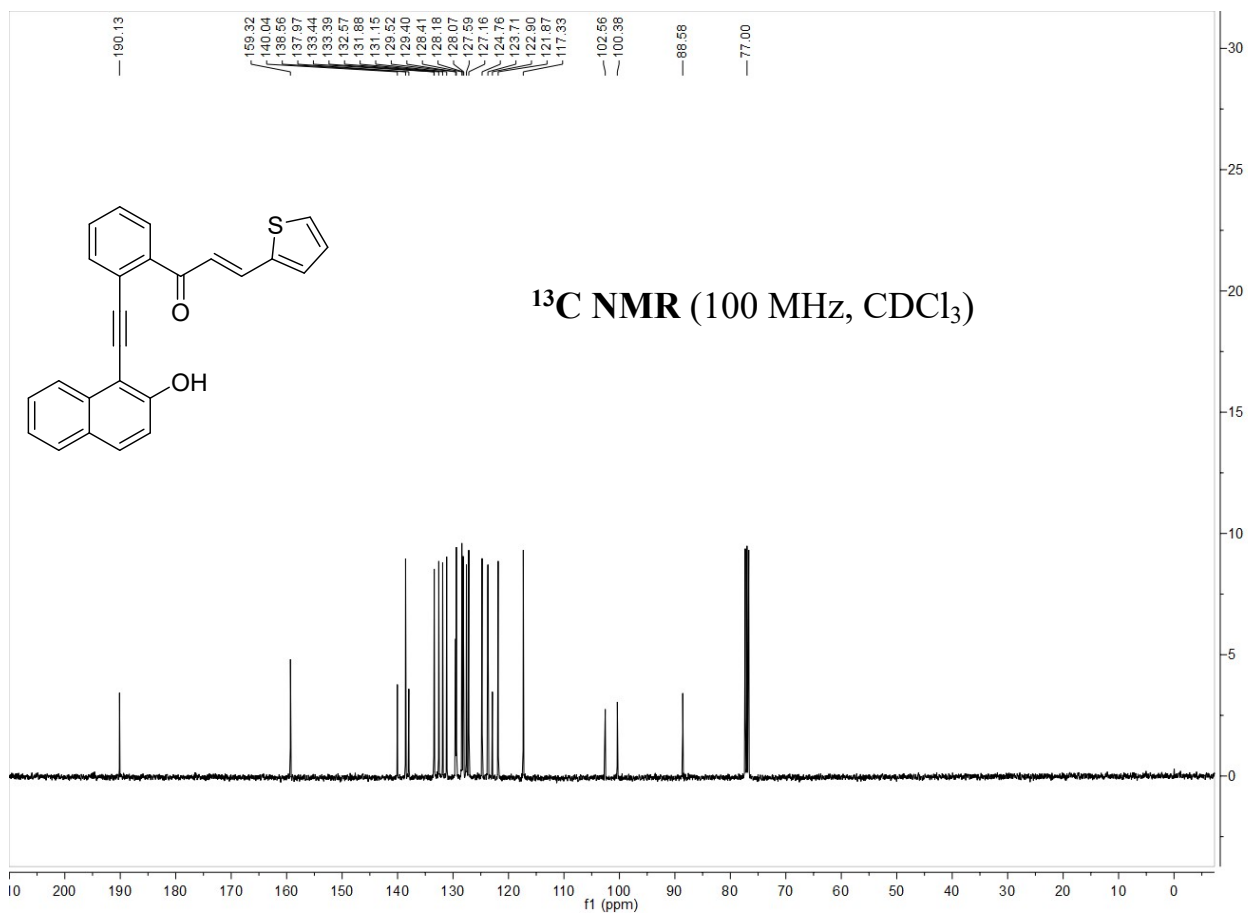

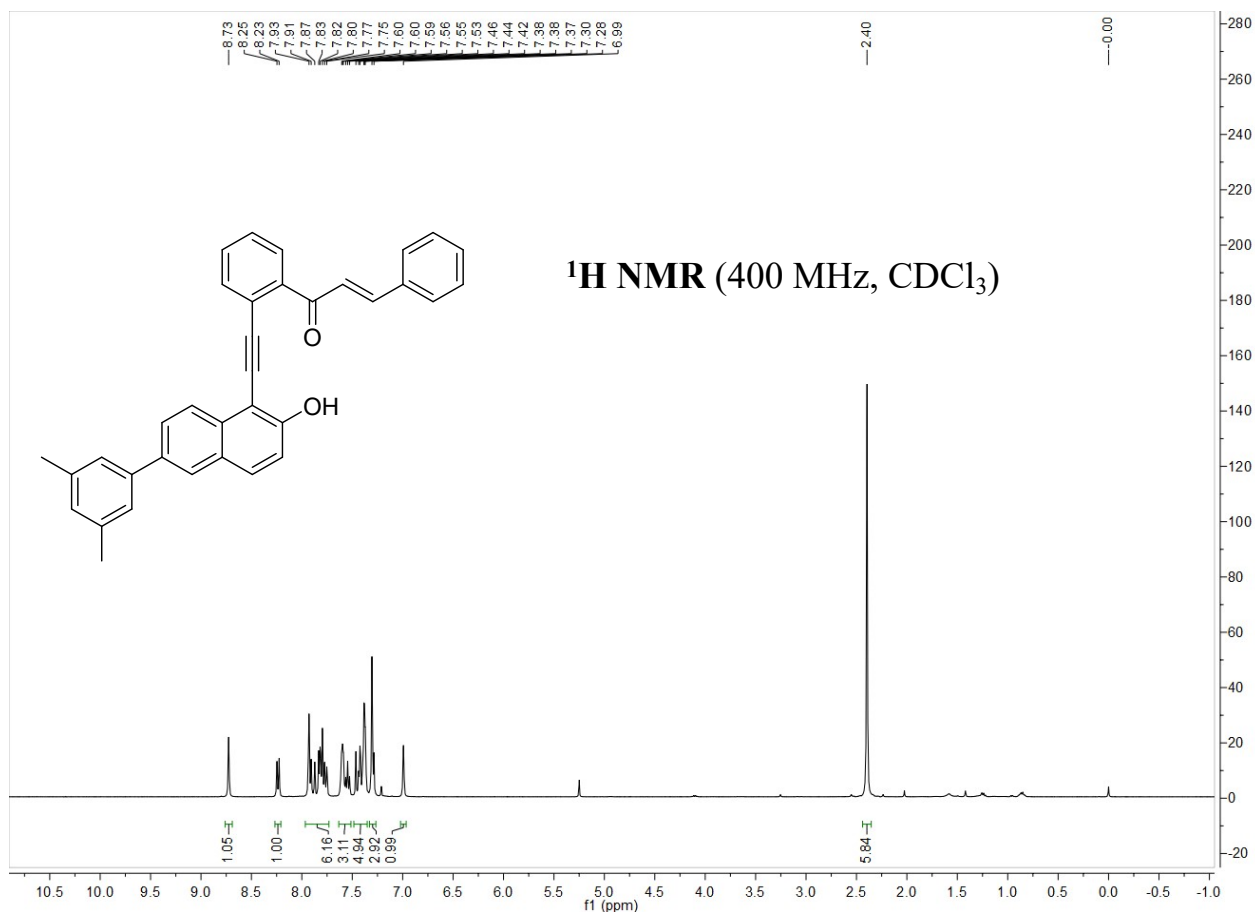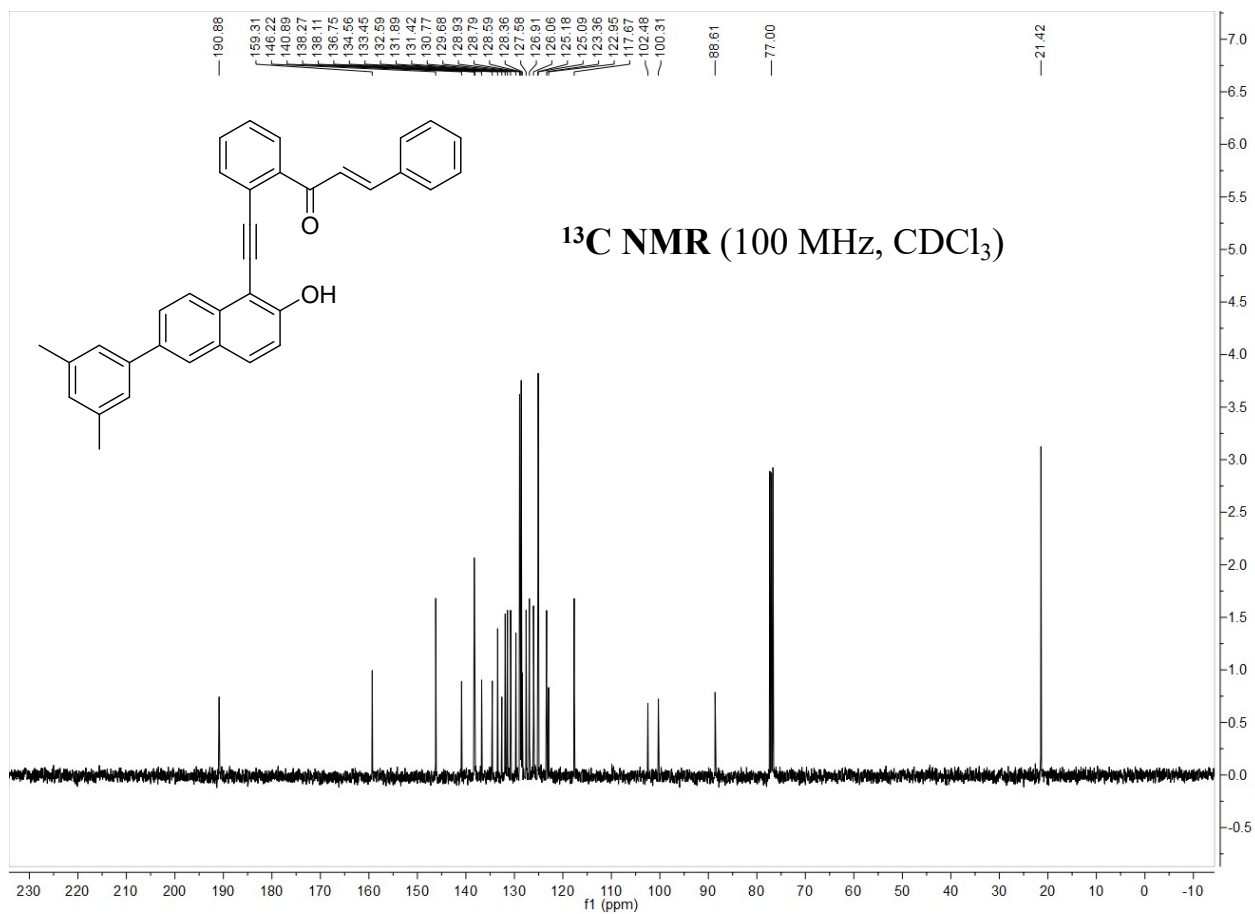

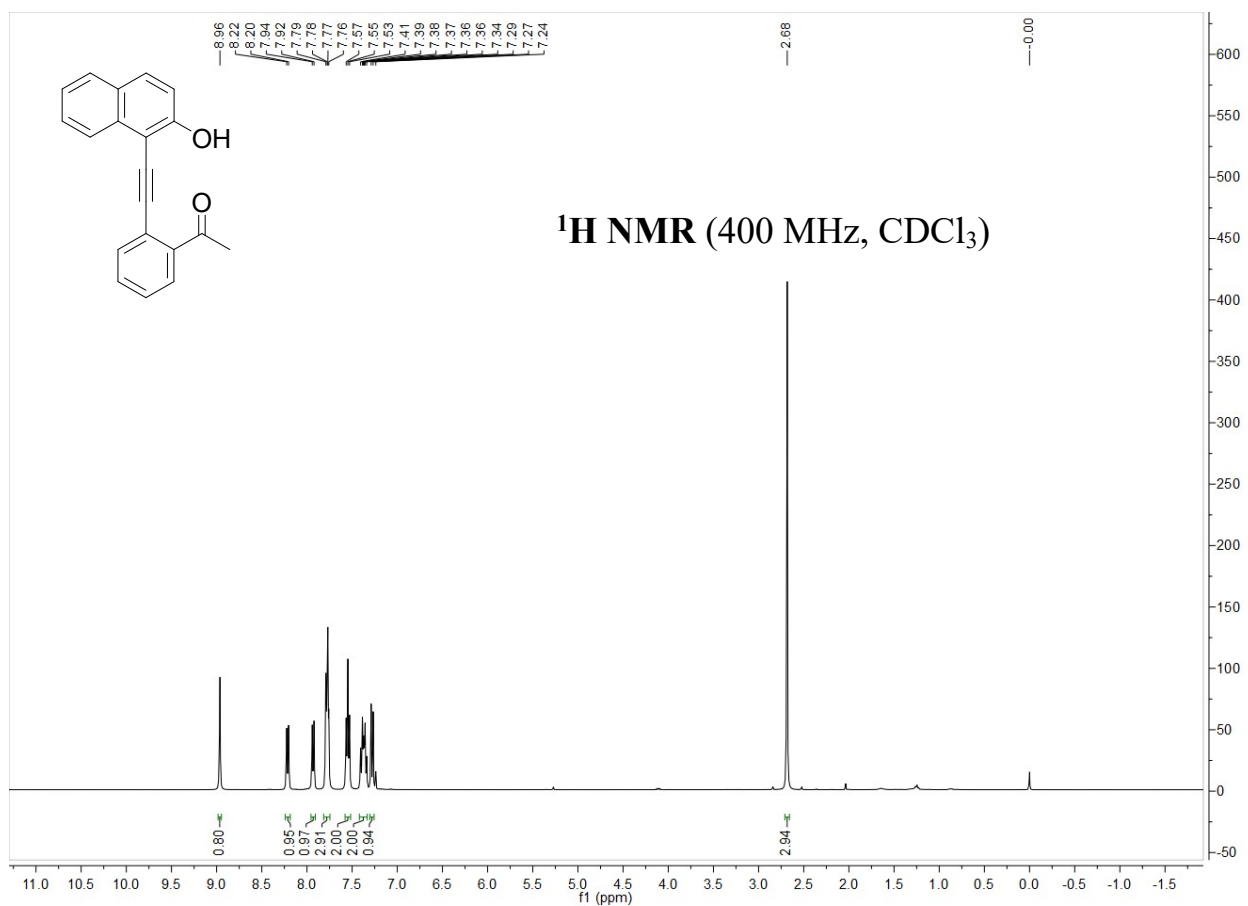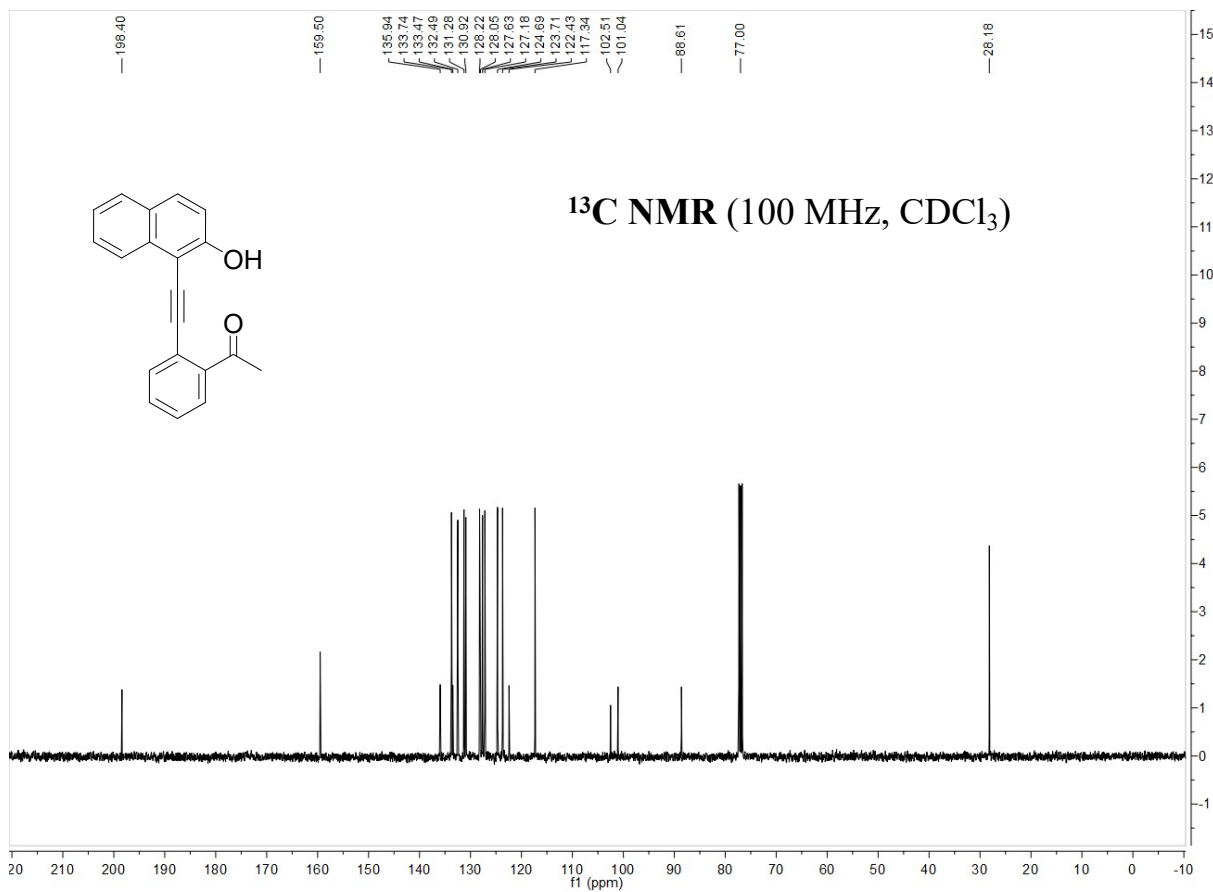

## X. <sup>1</sup>H and <sup>13</sup>C NMR spectra of substrates (2a-2w, 4a-4j, M1, 5j-6j)

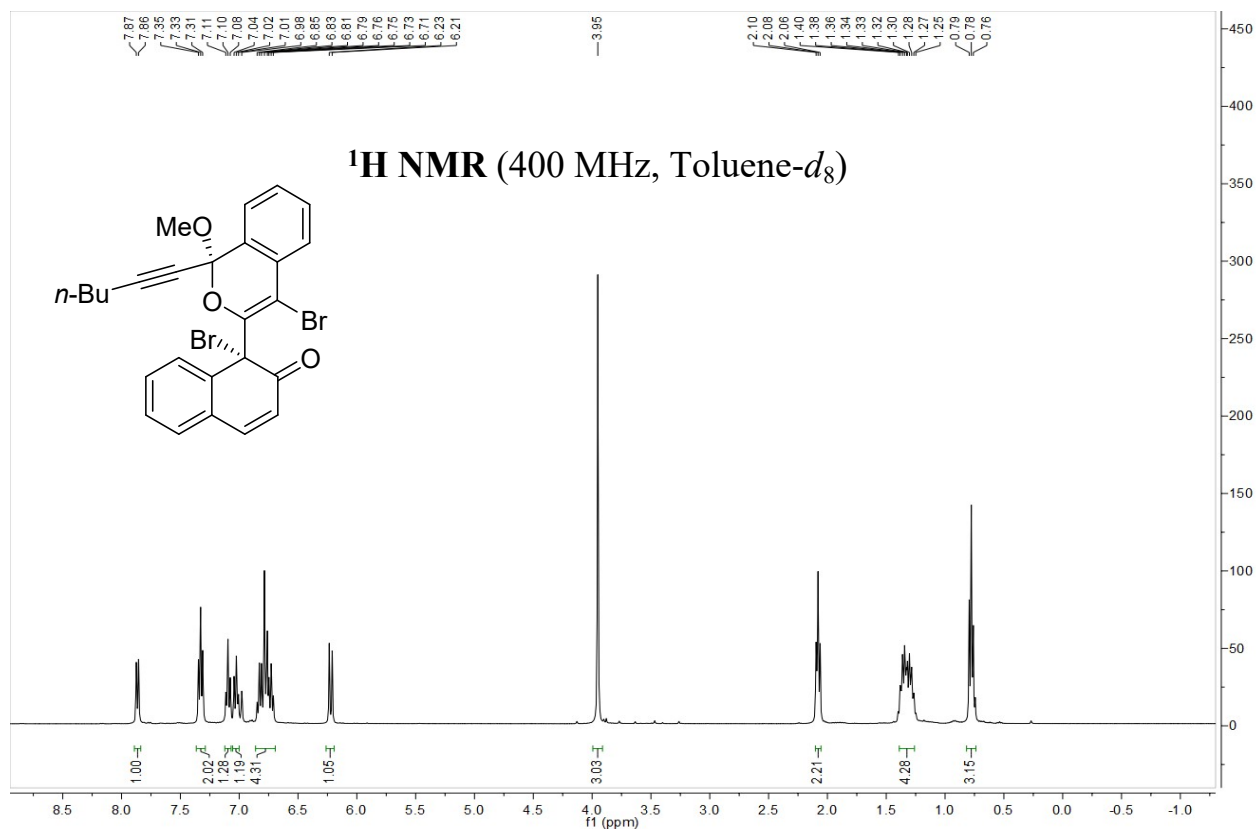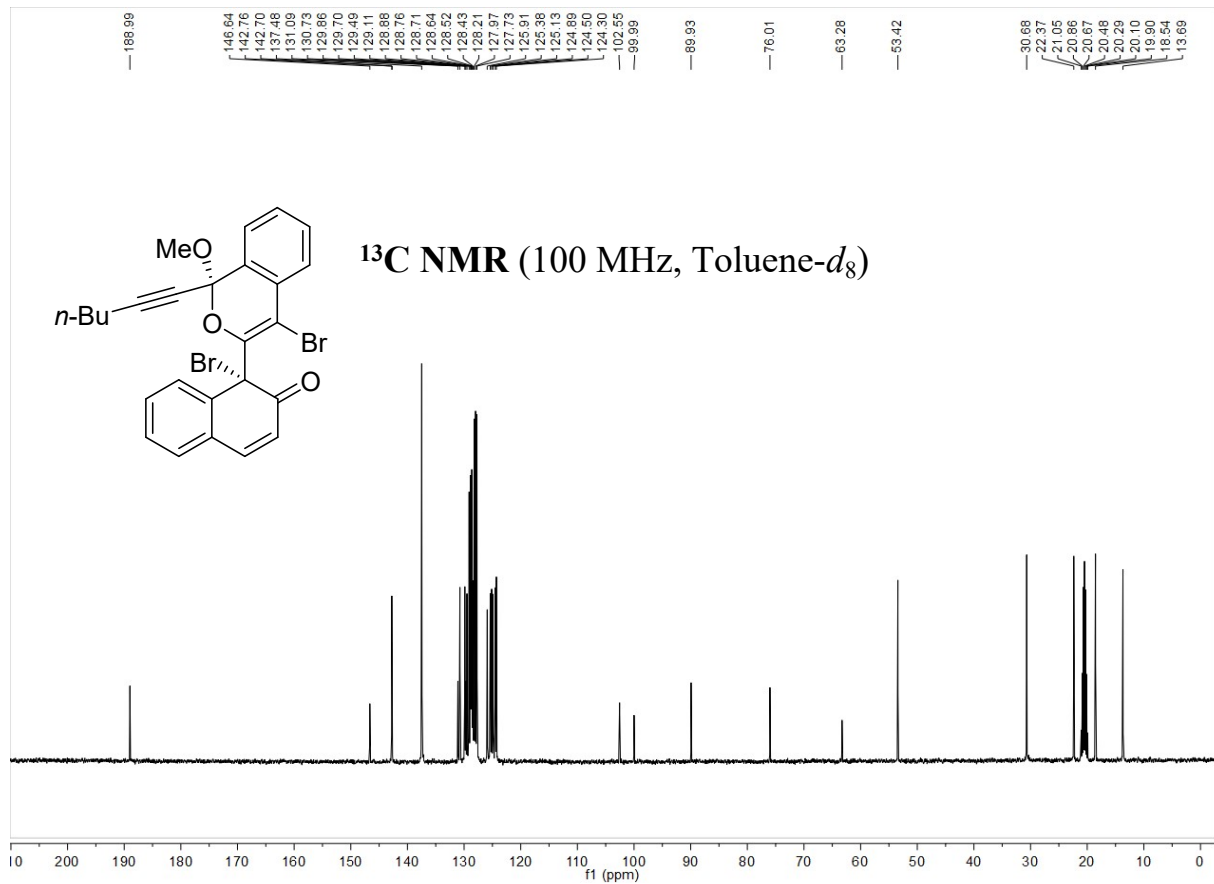



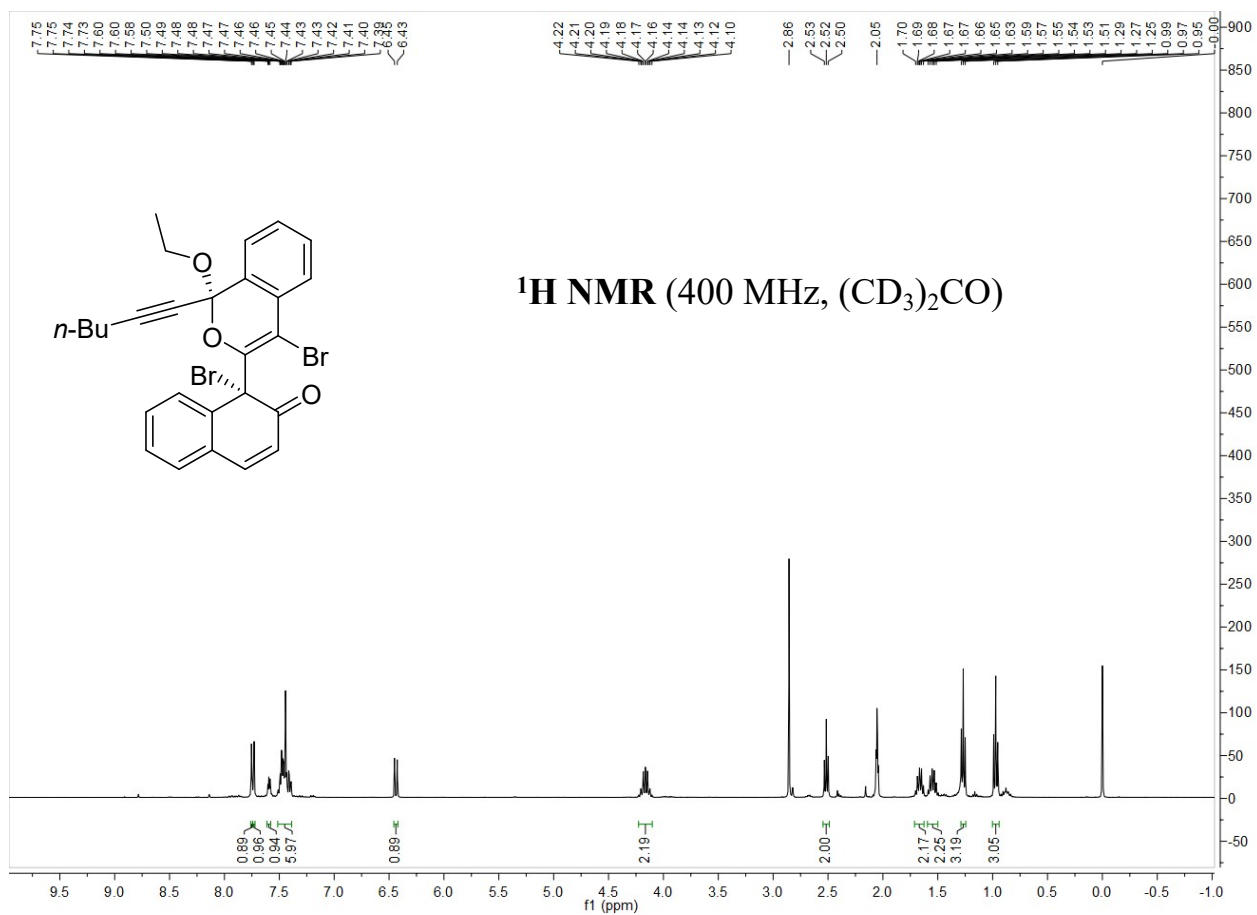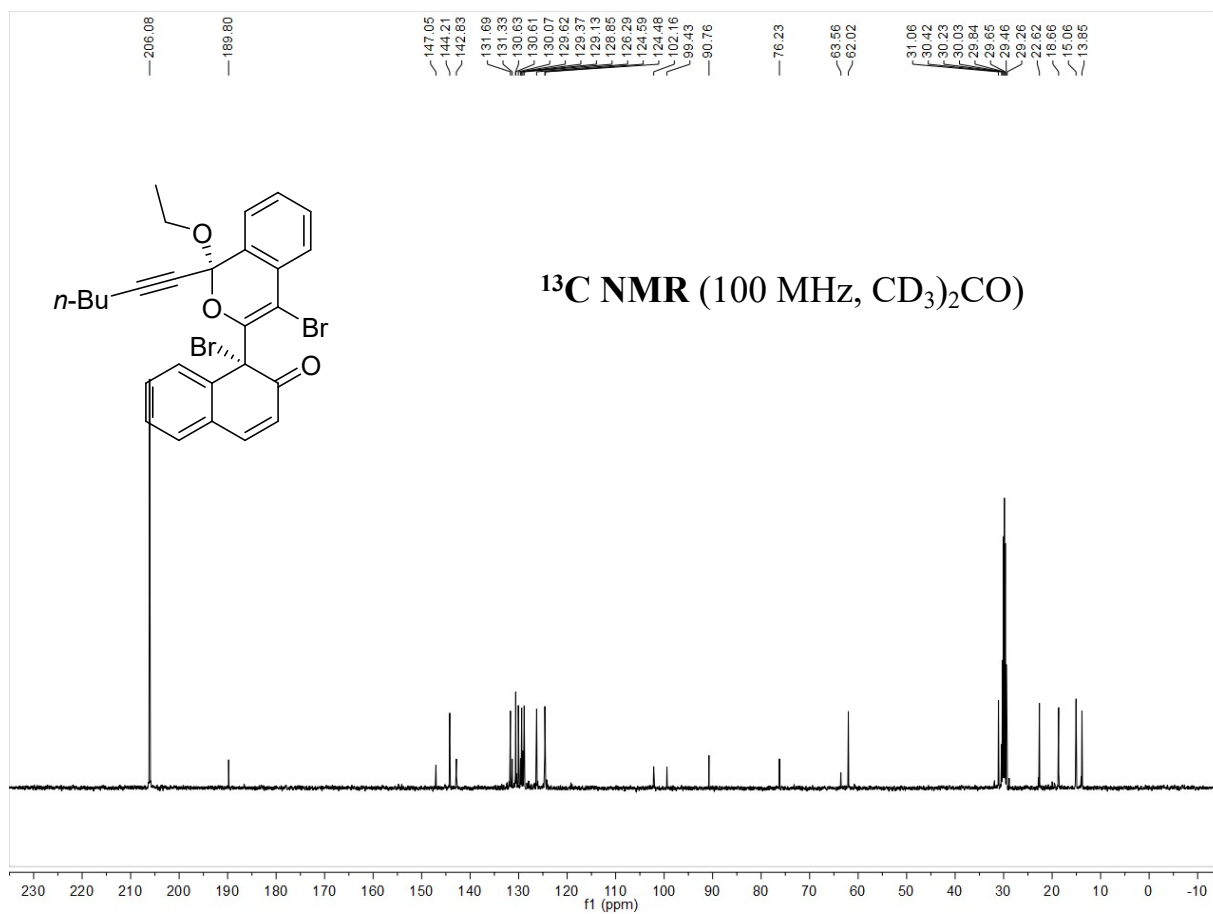

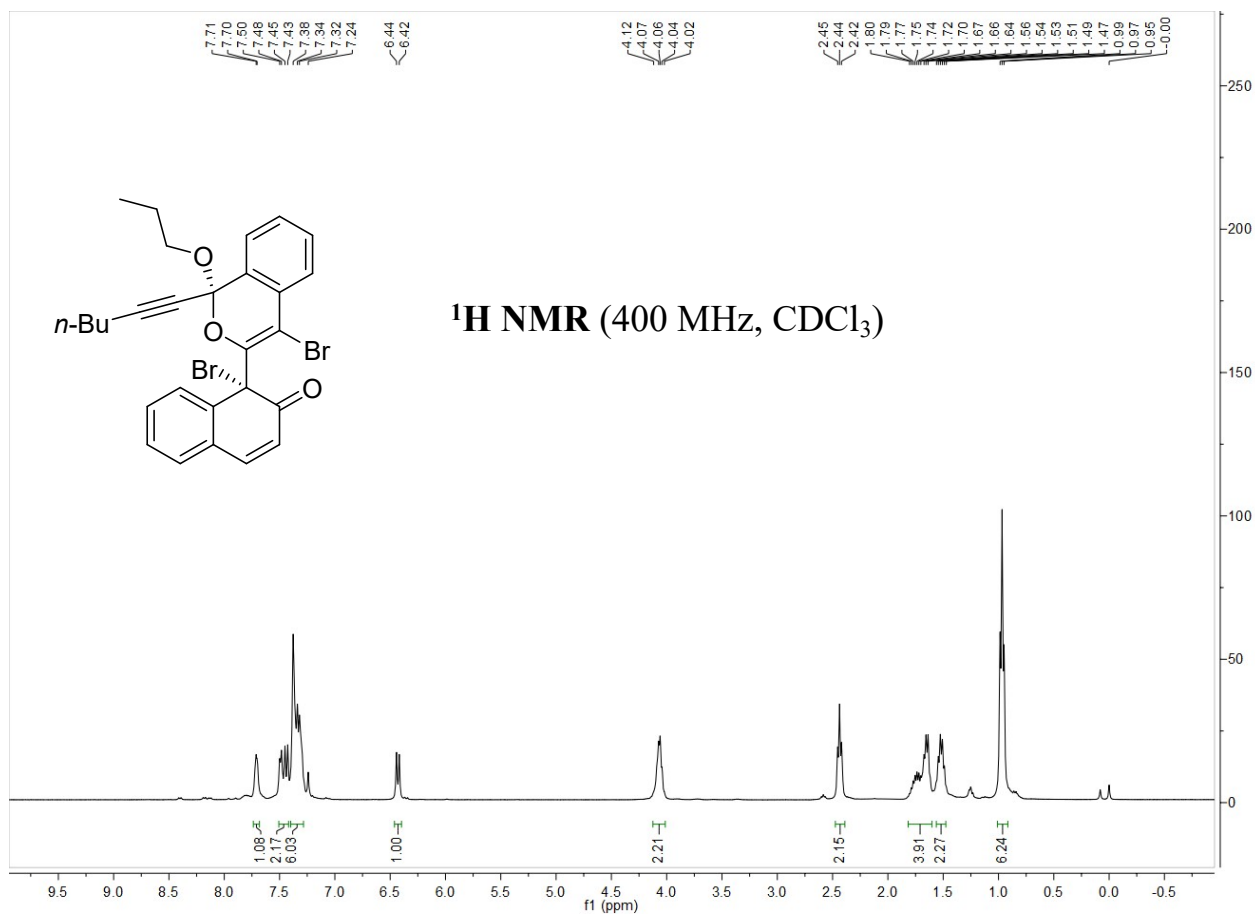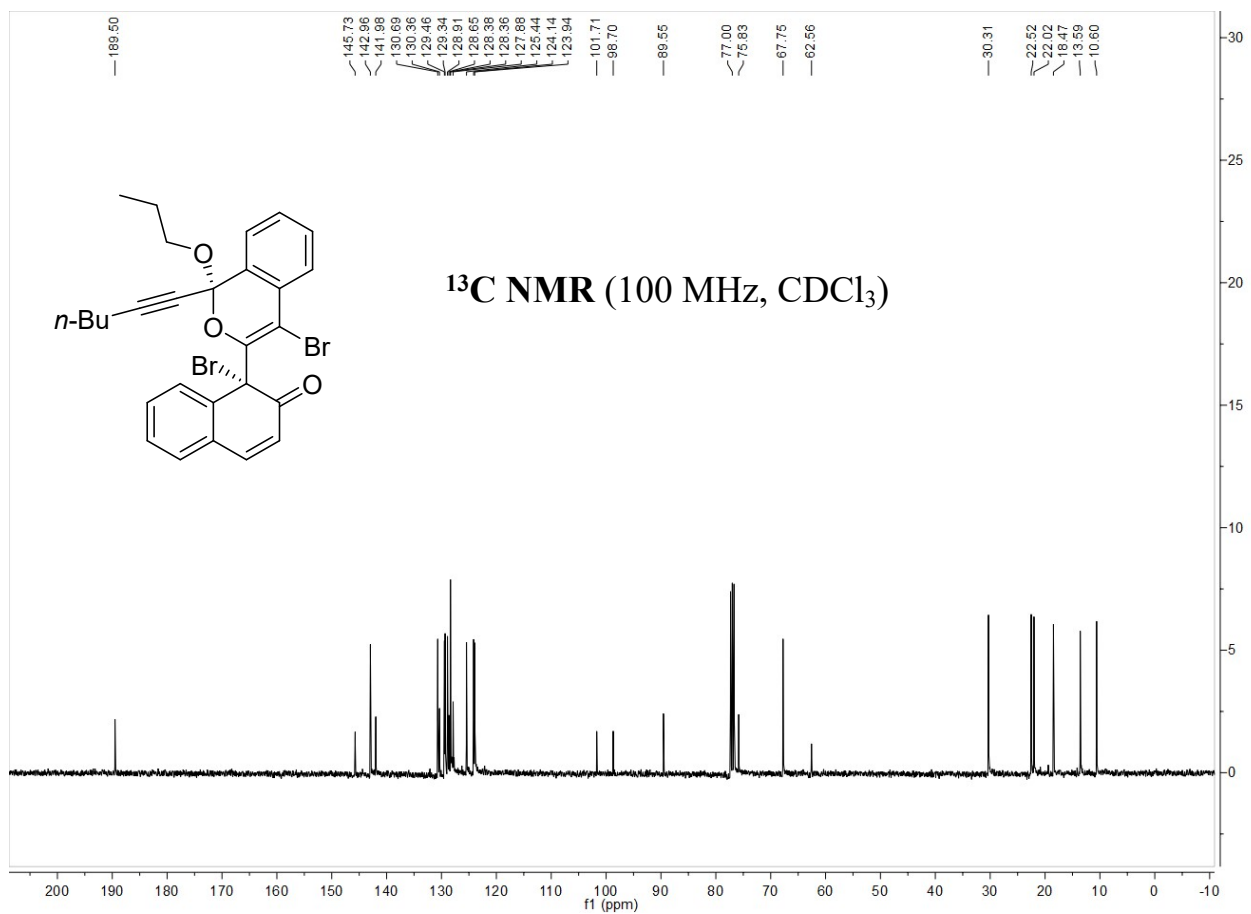

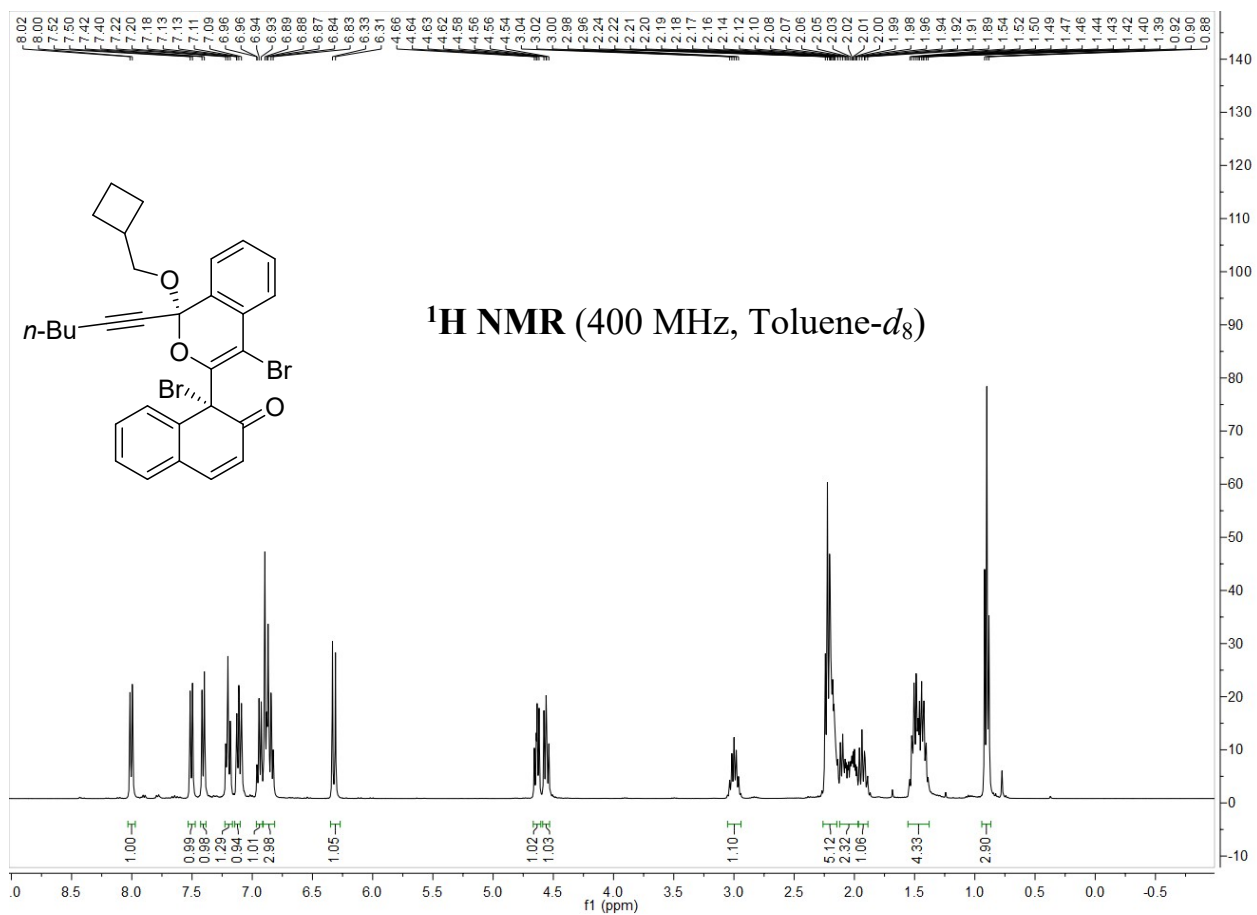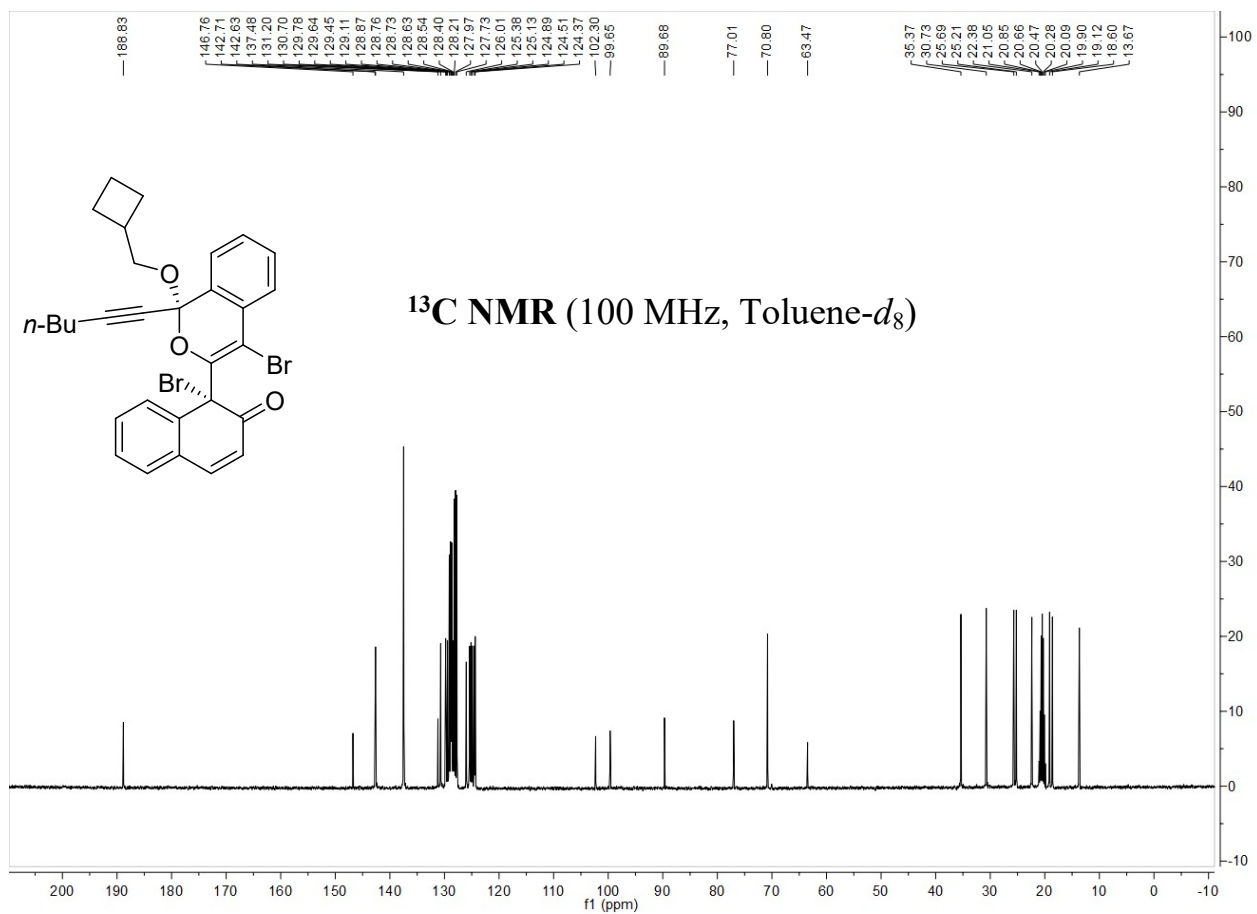

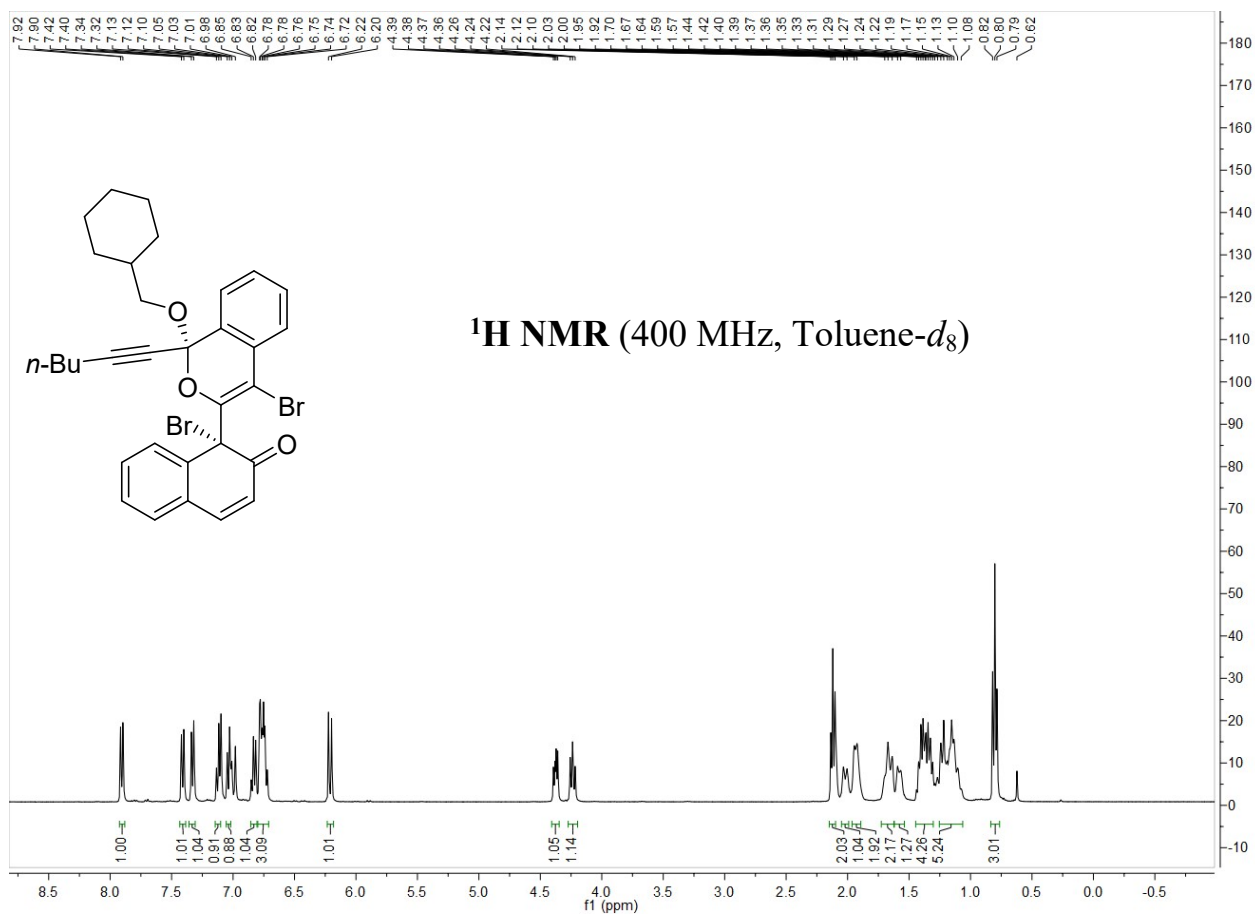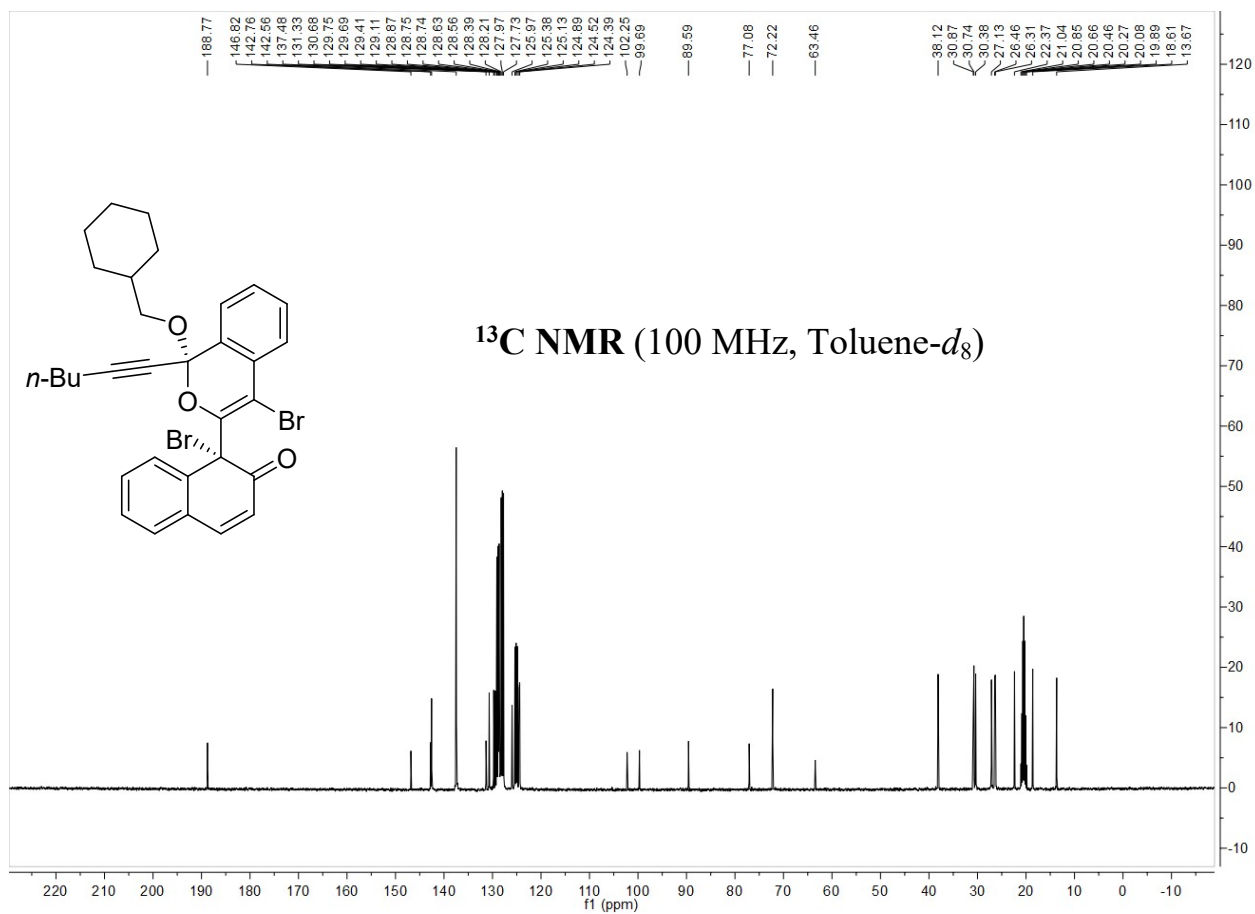

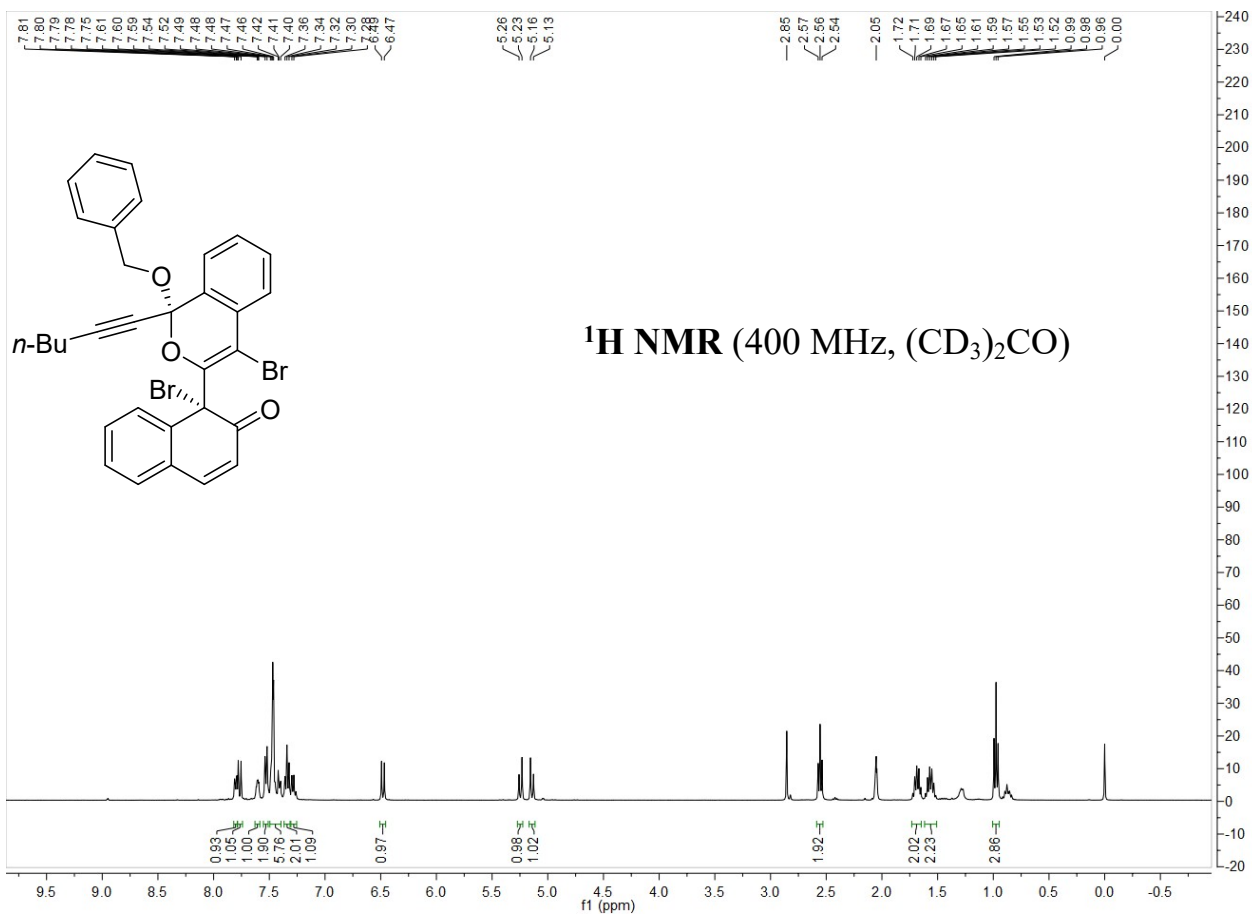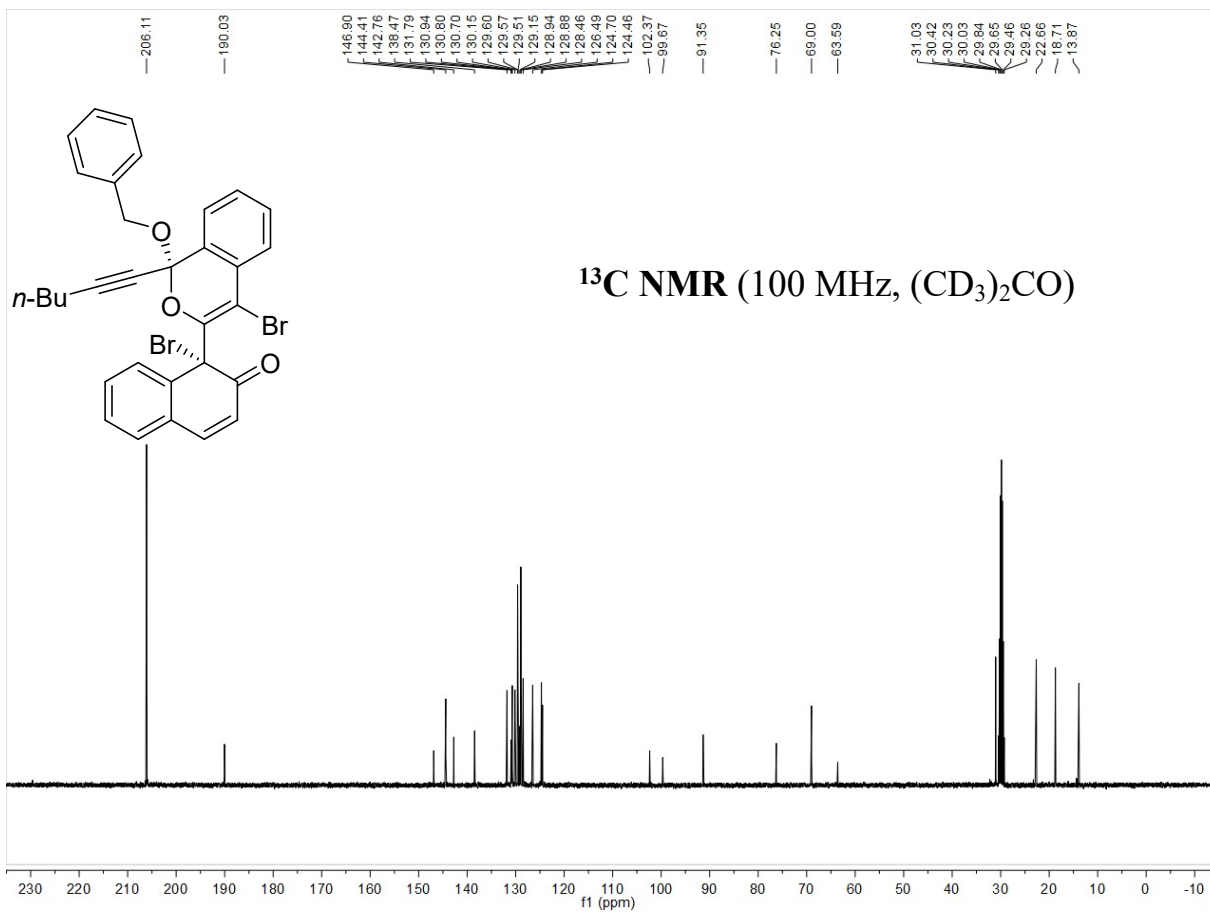

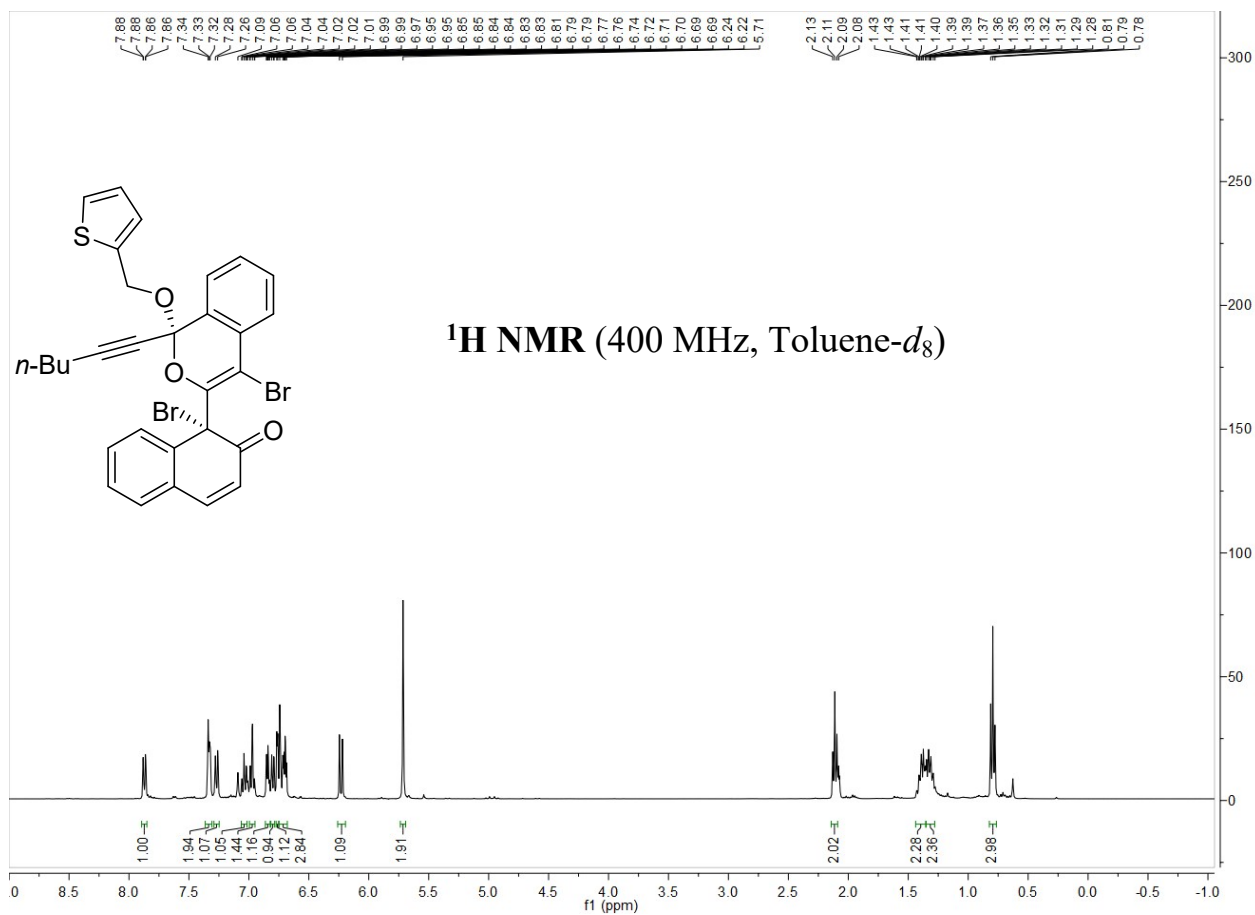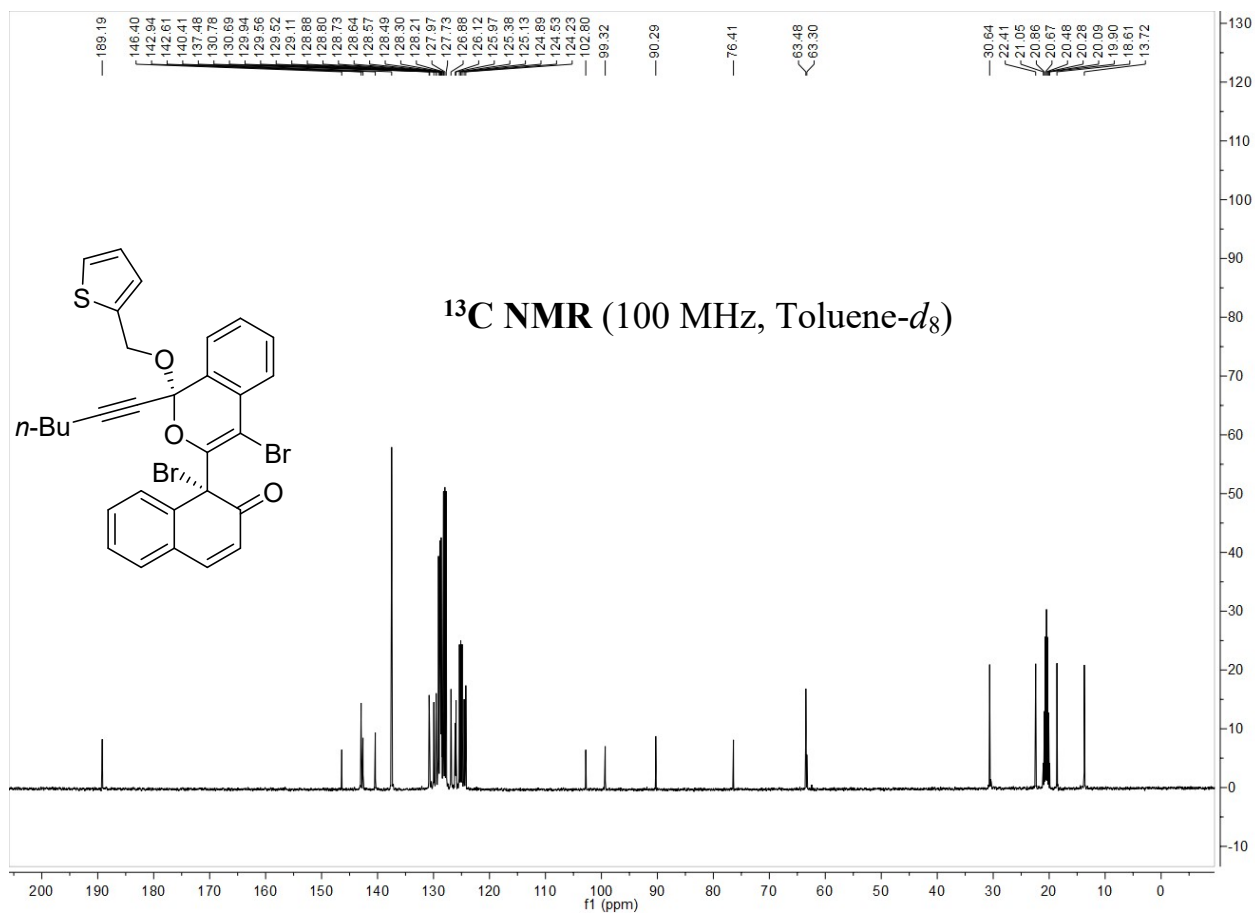

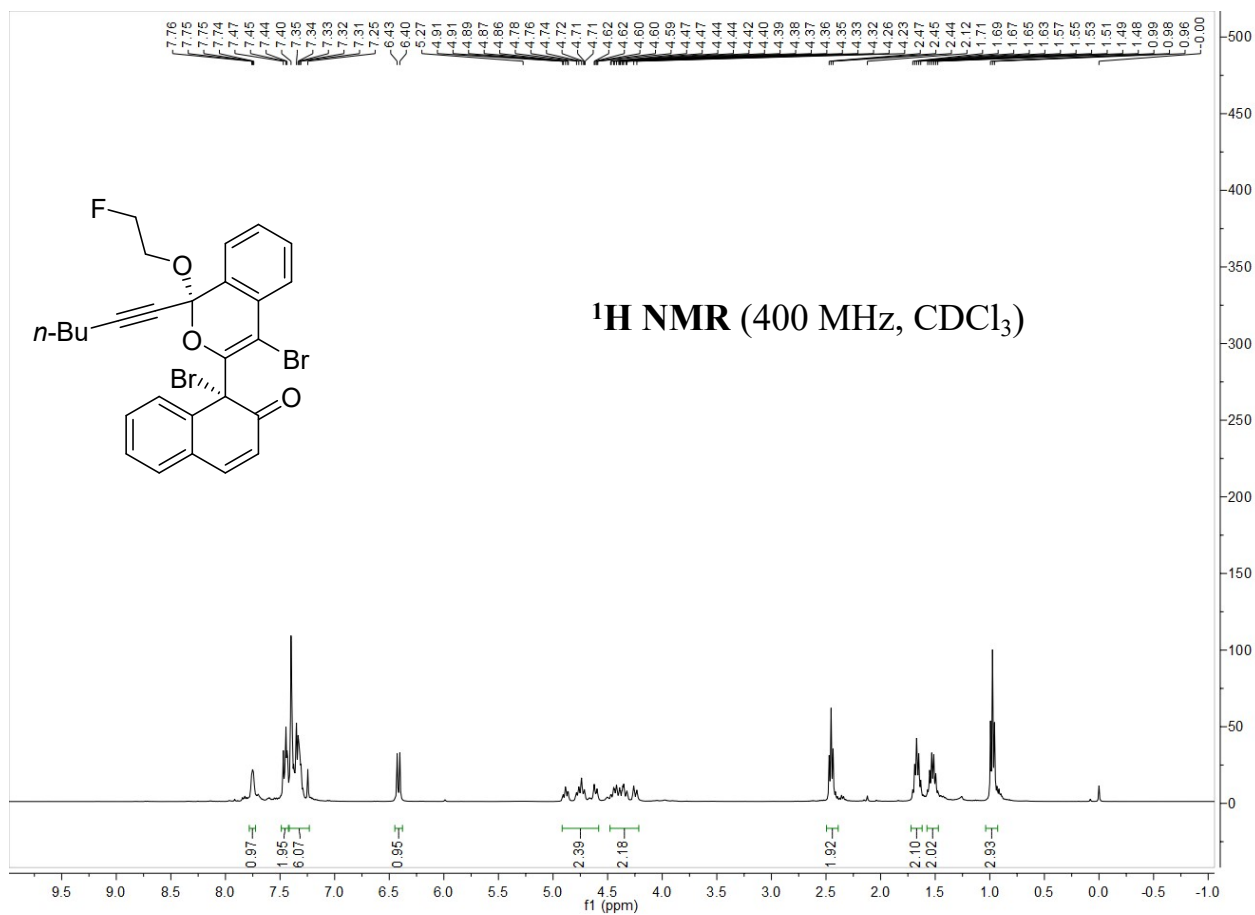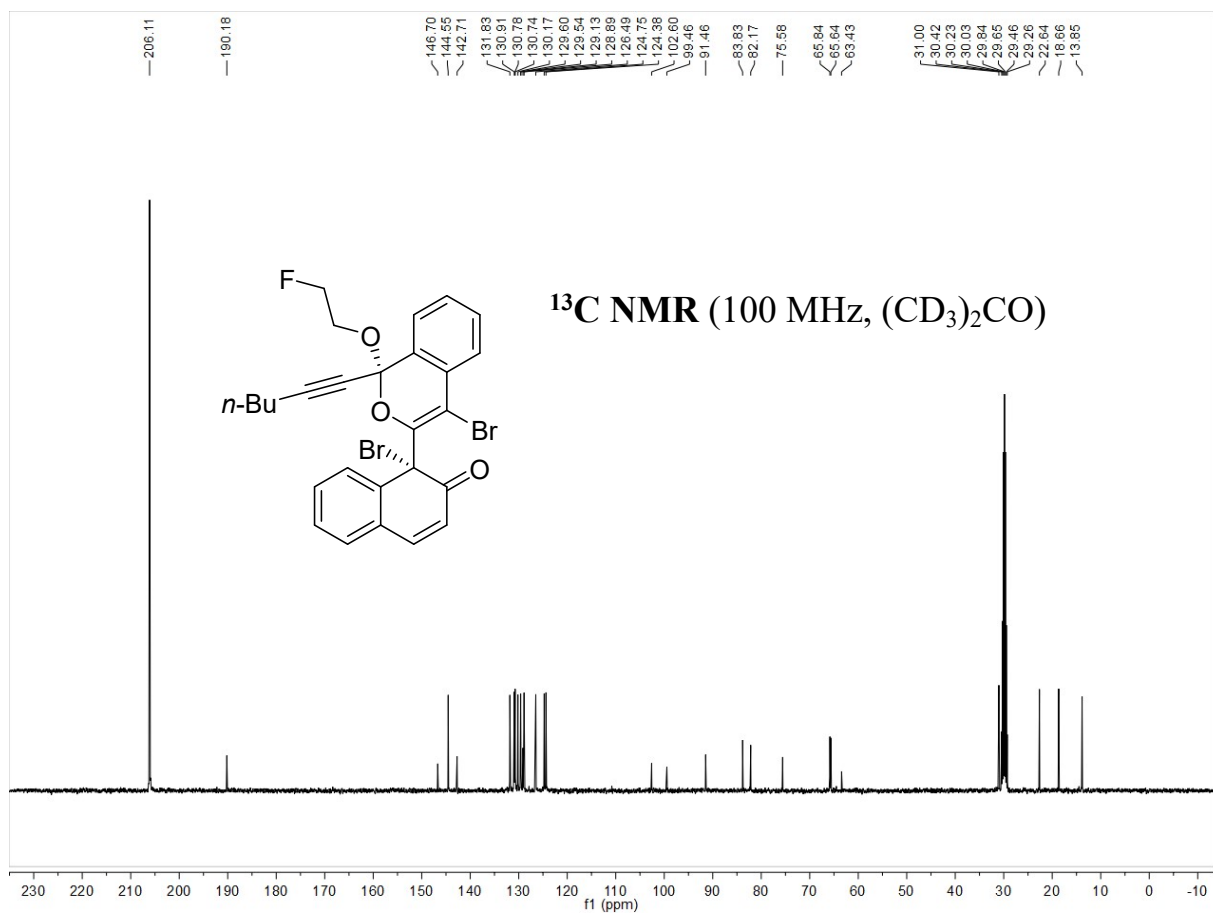

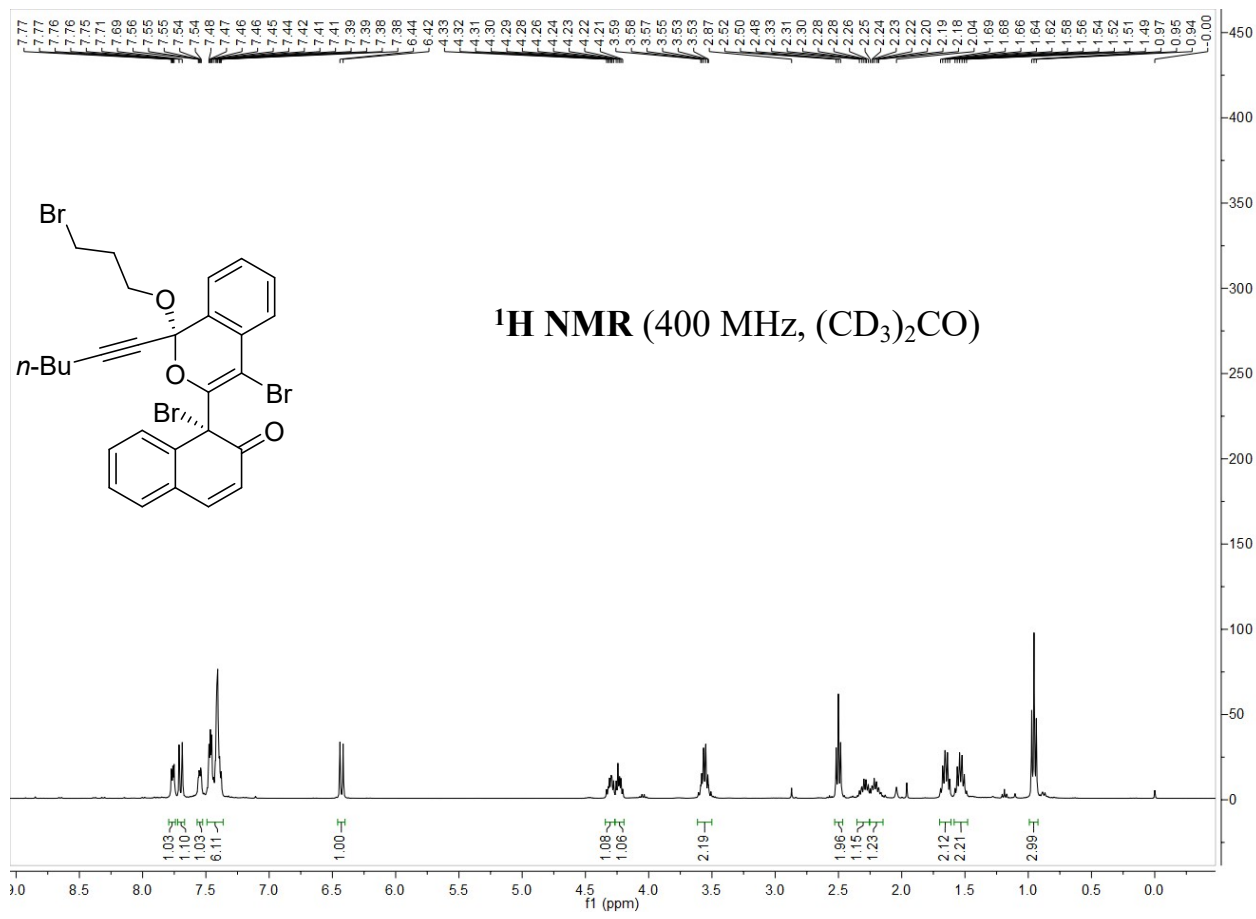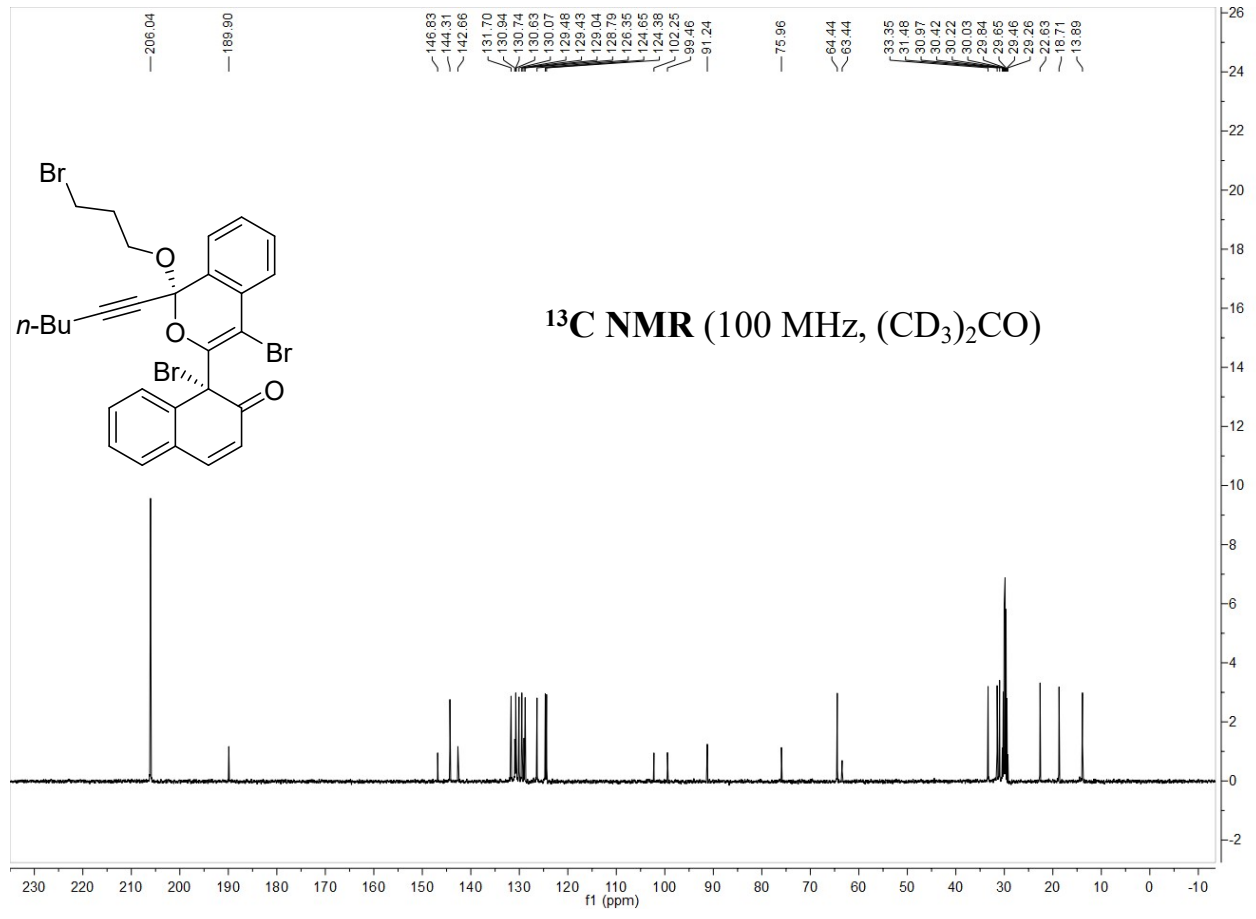



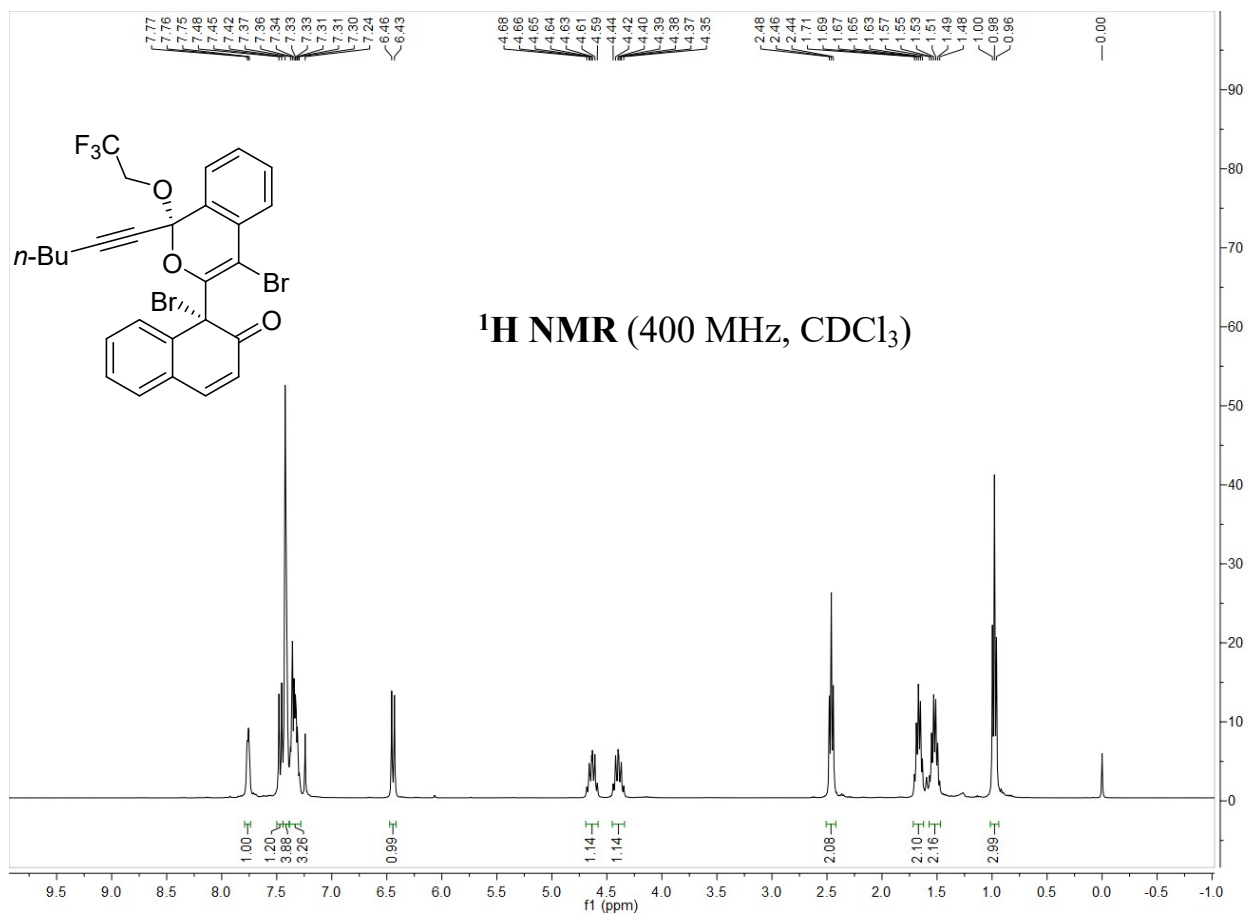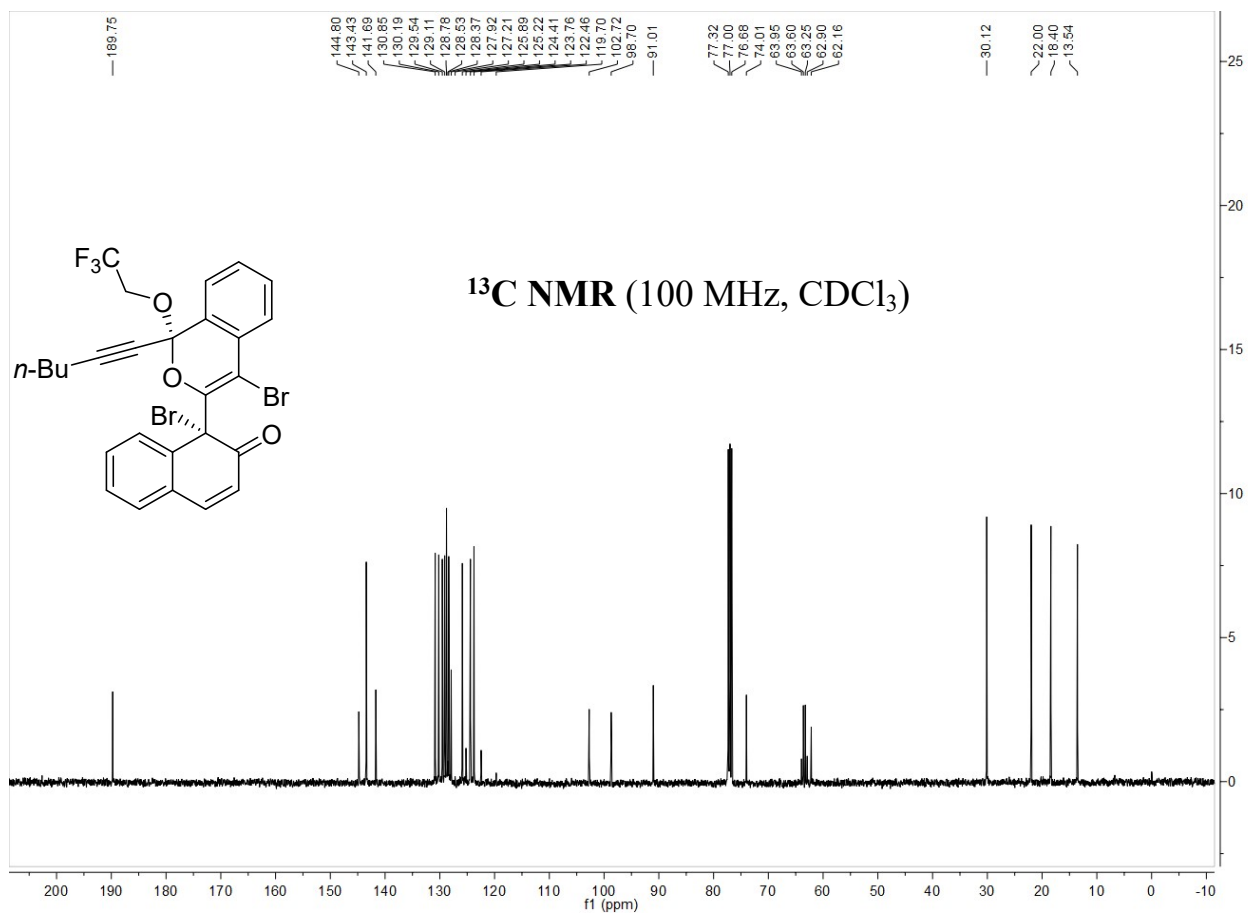

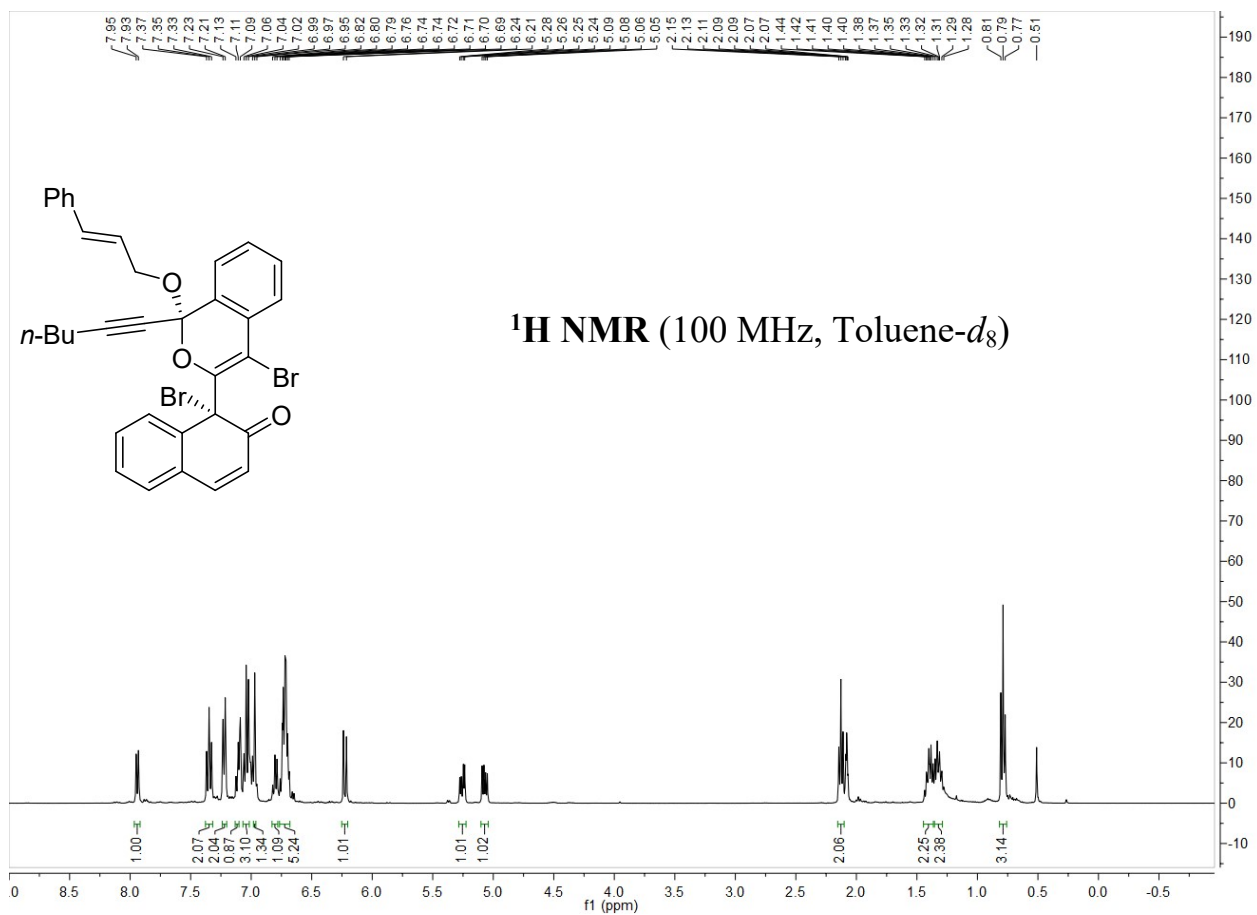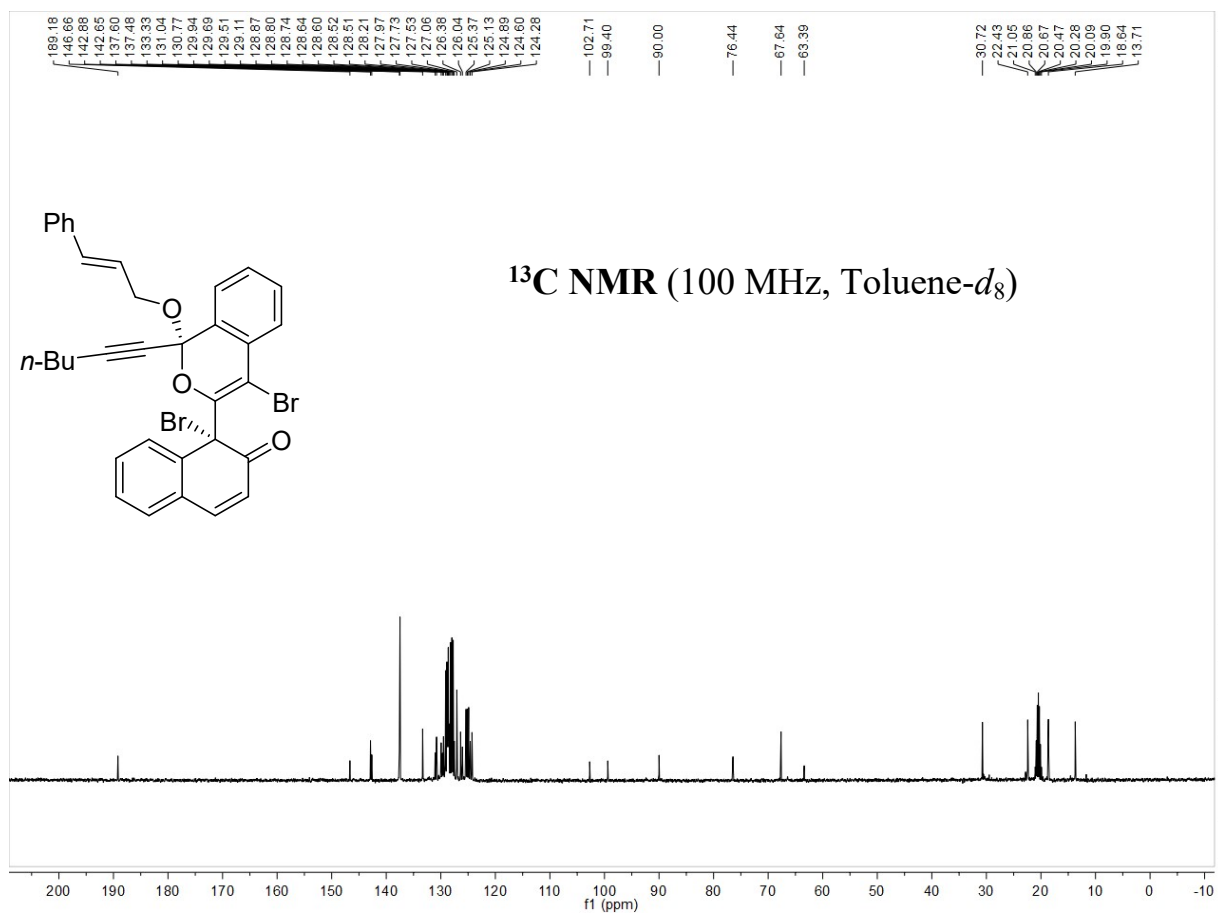

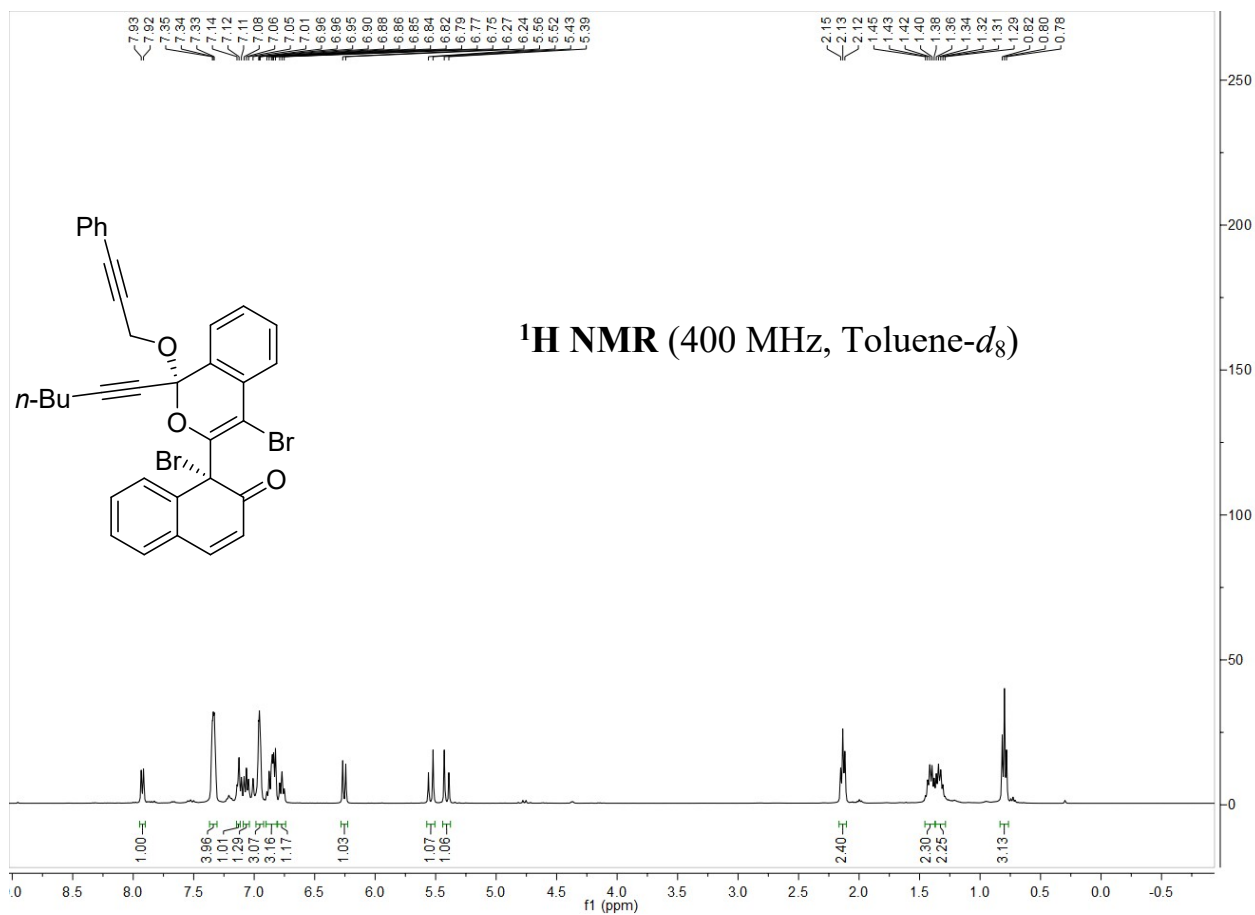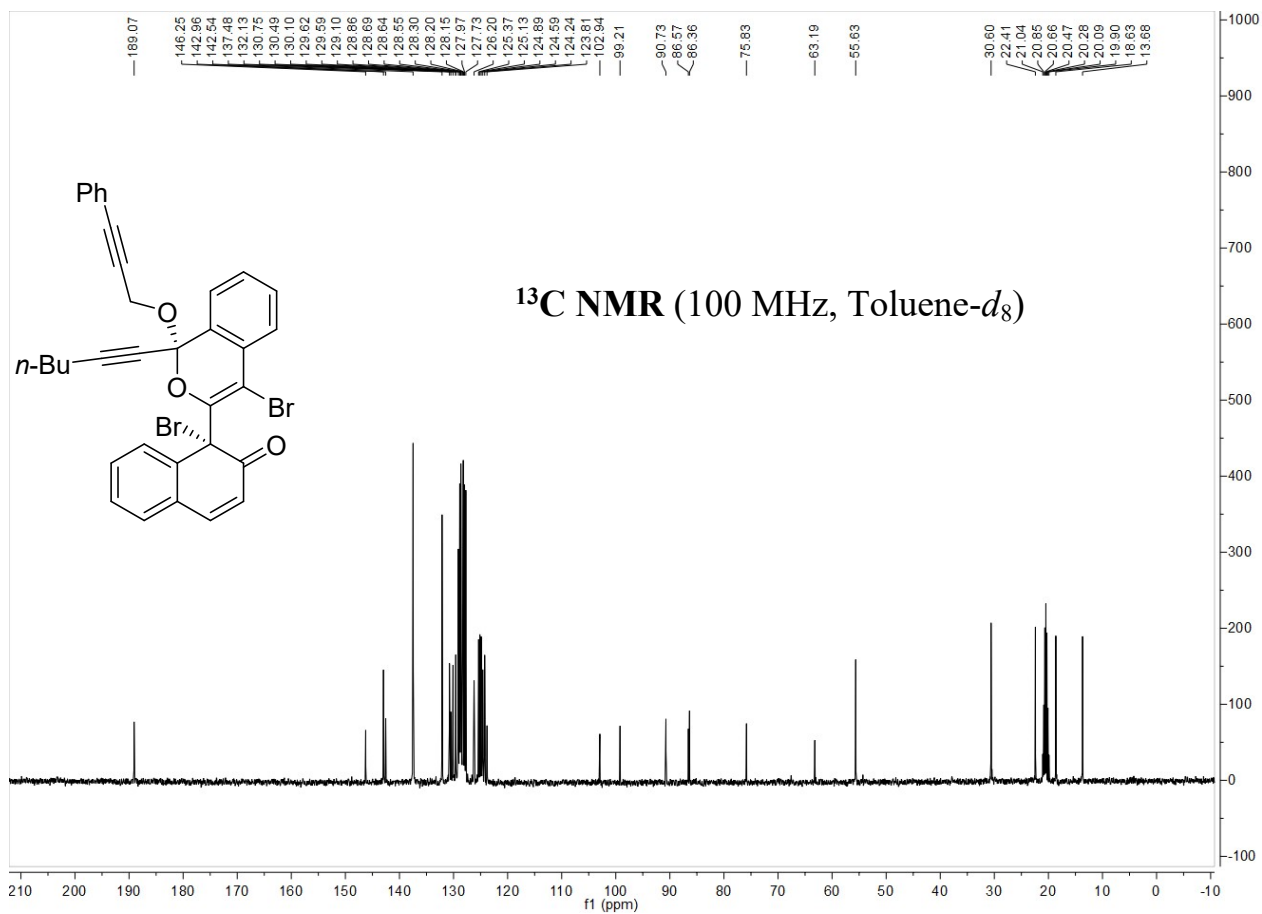

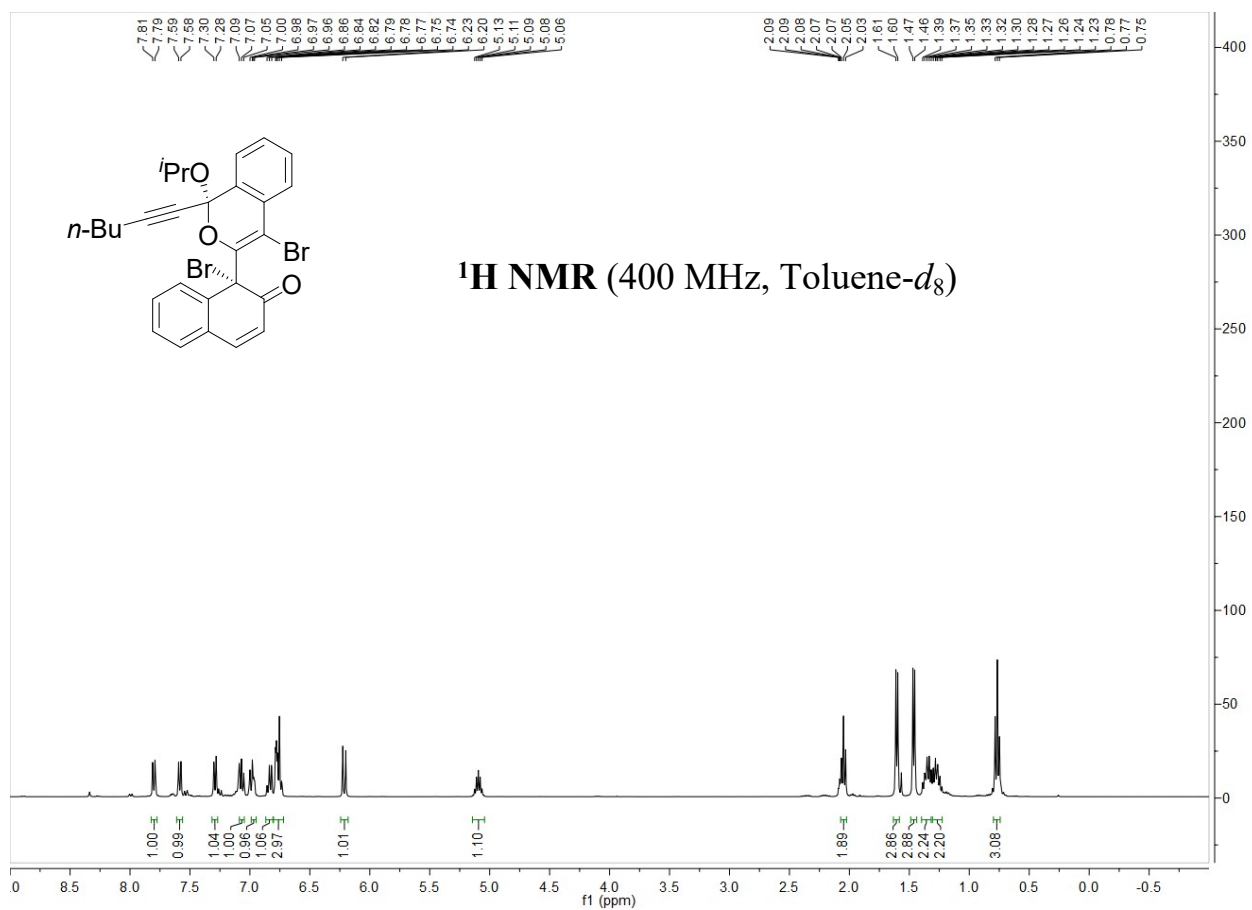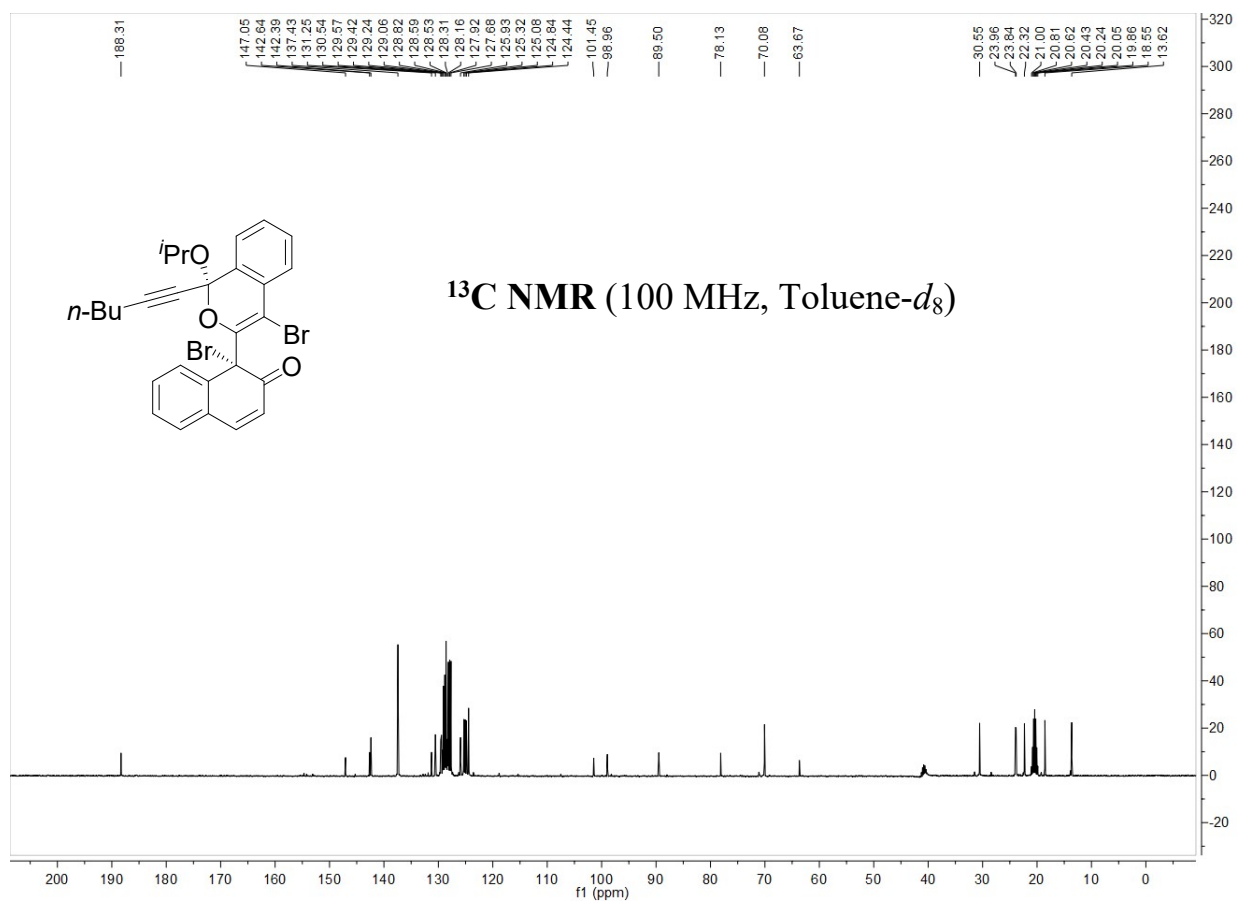

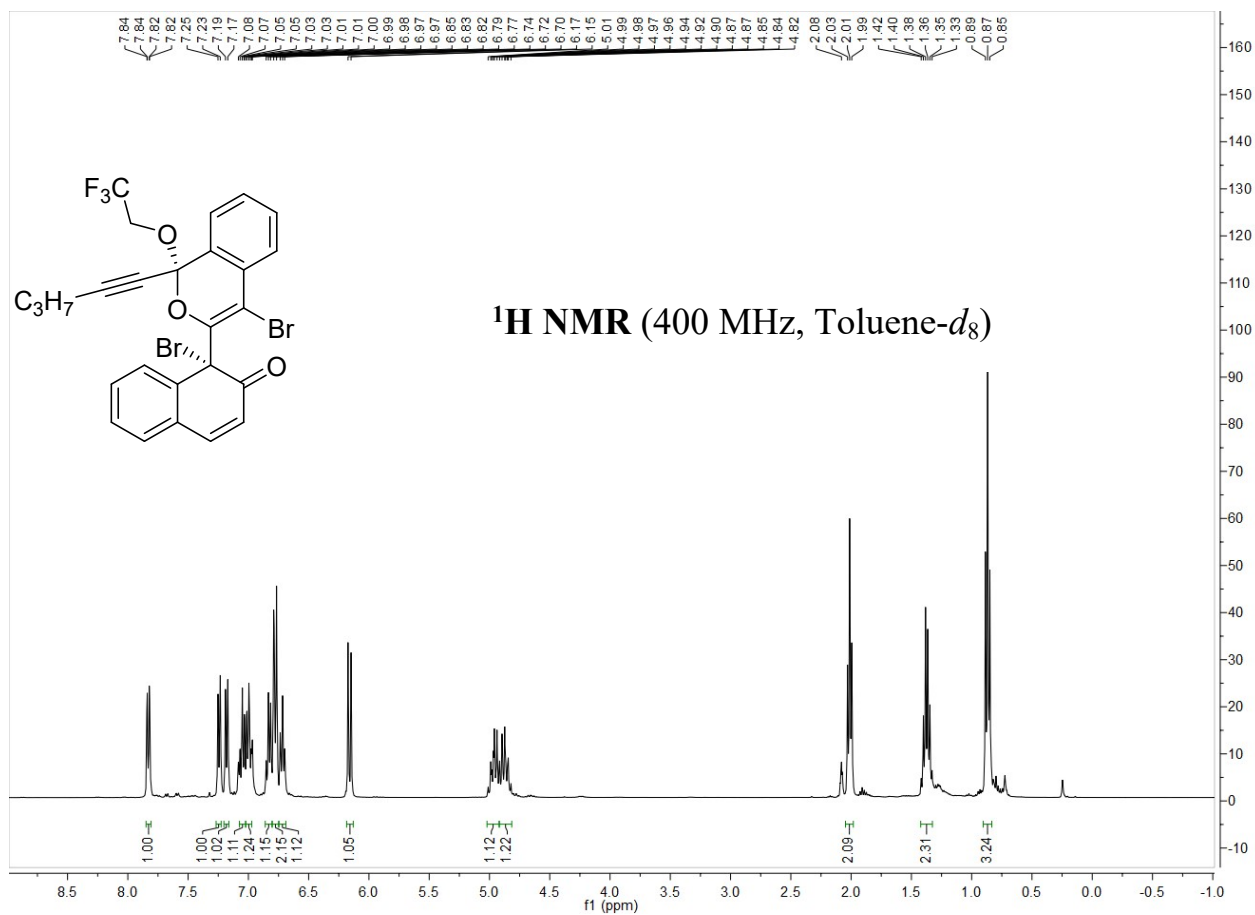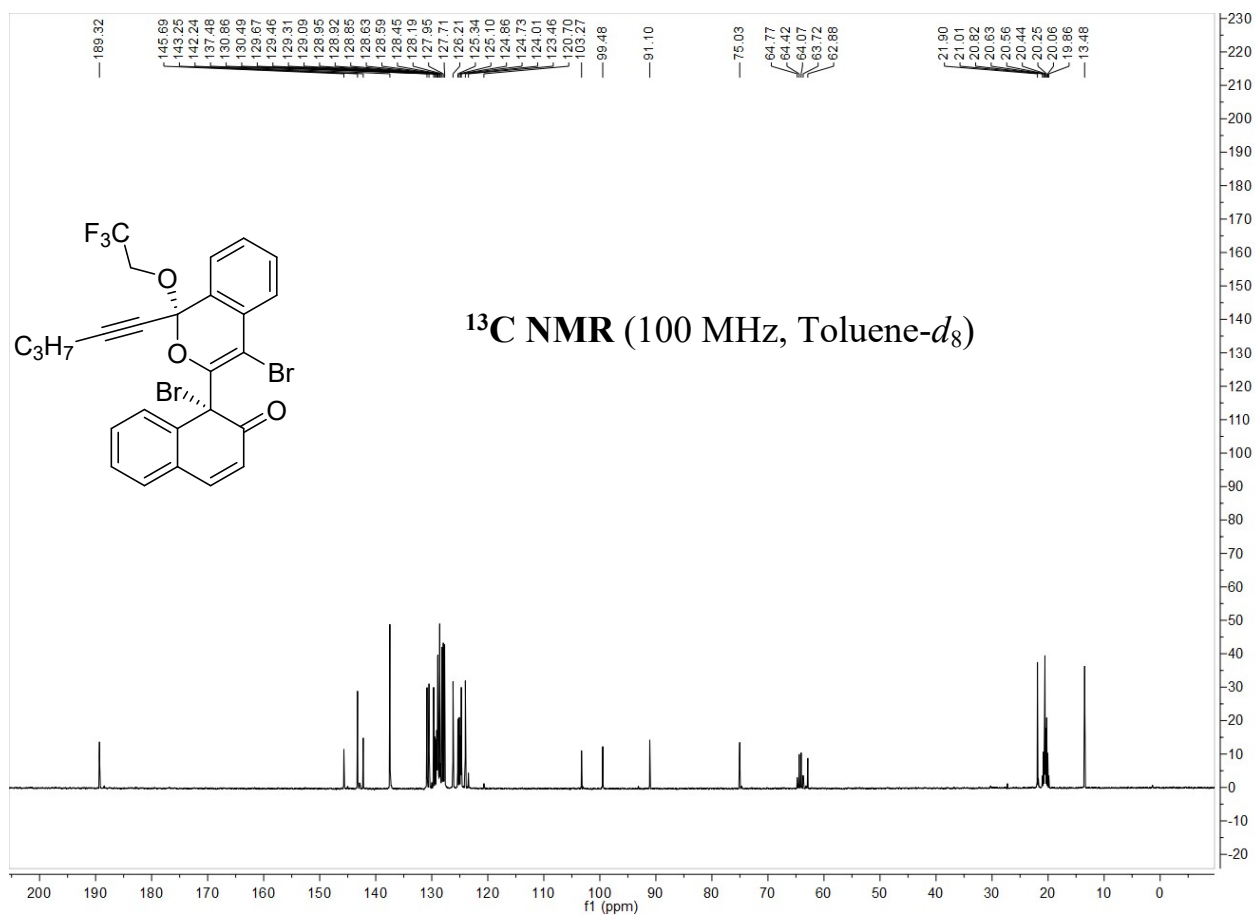

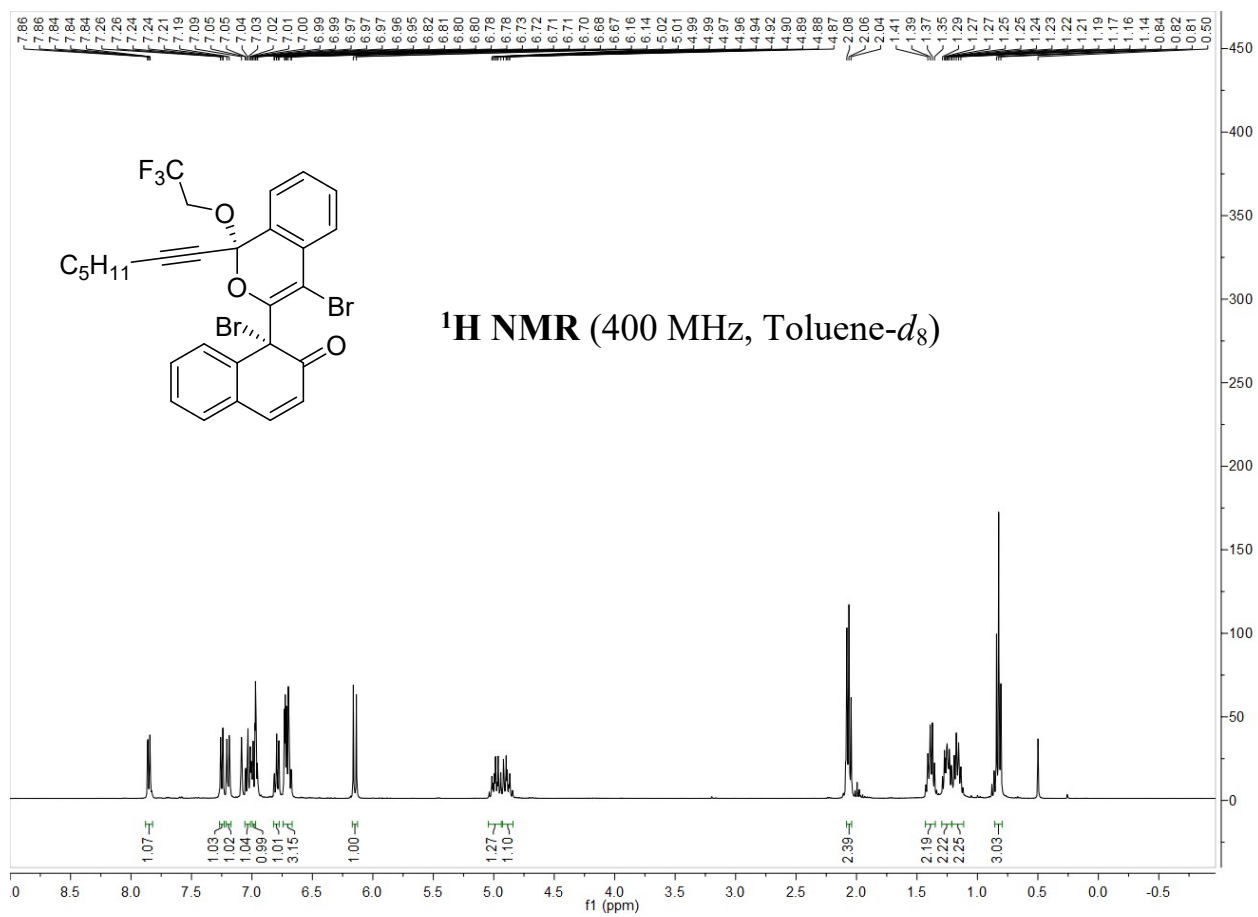

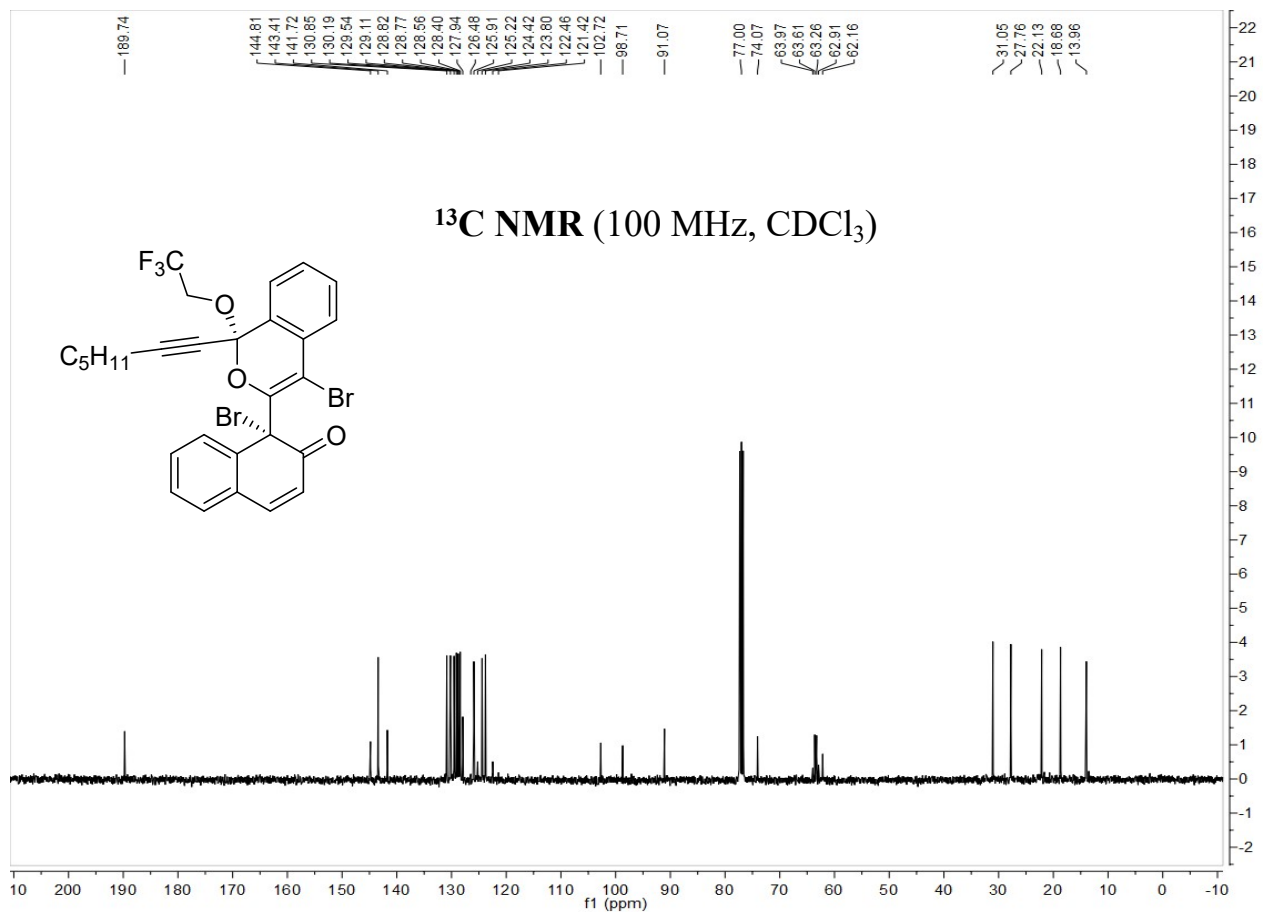

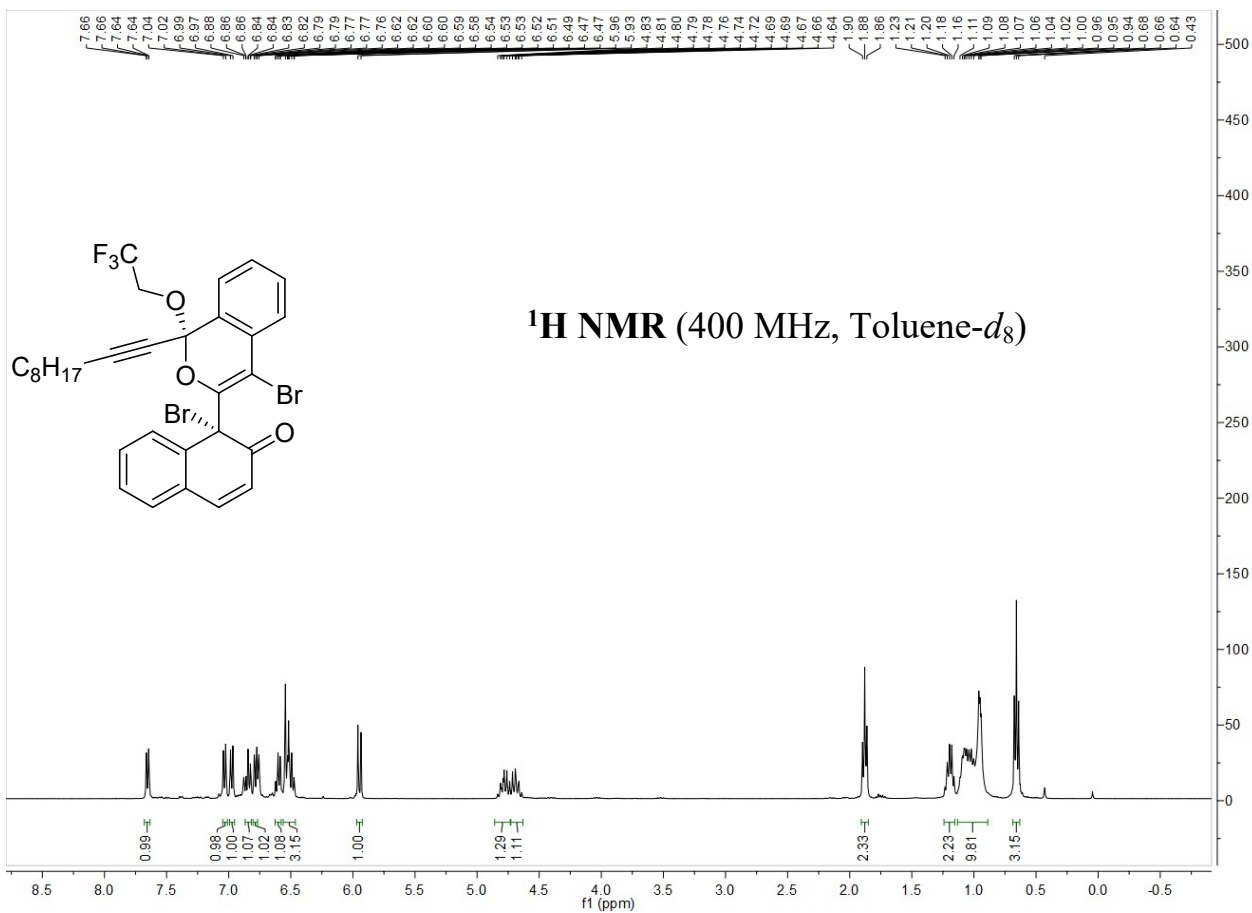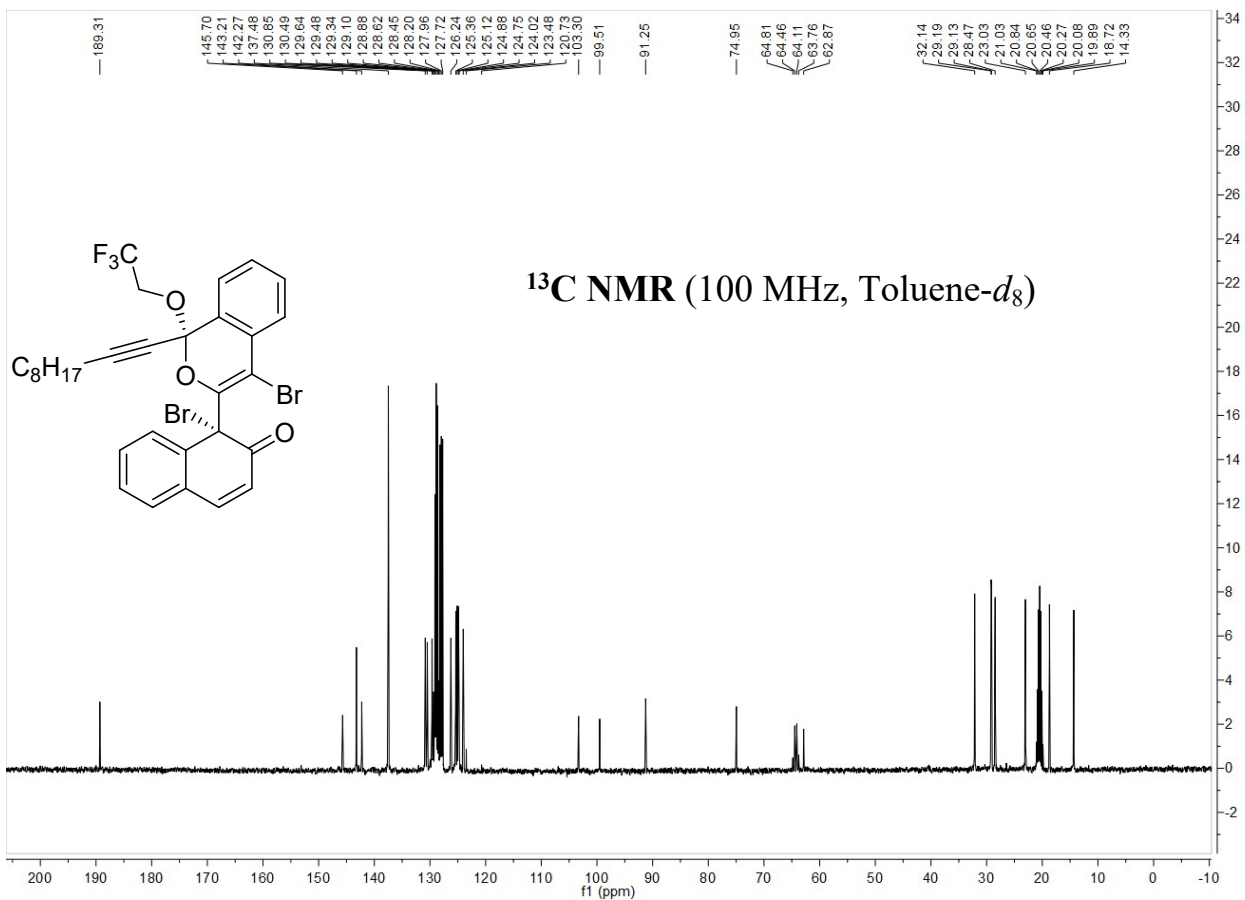



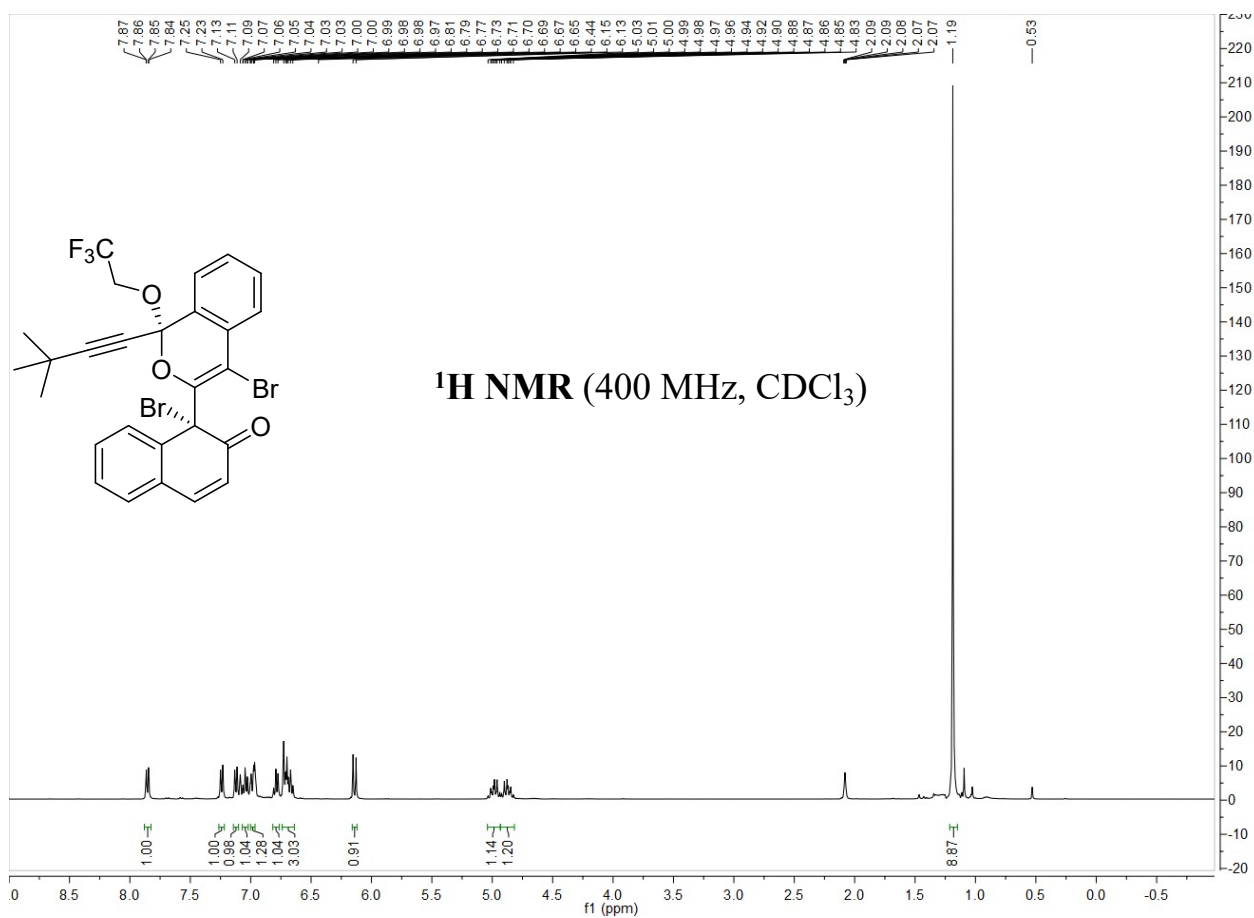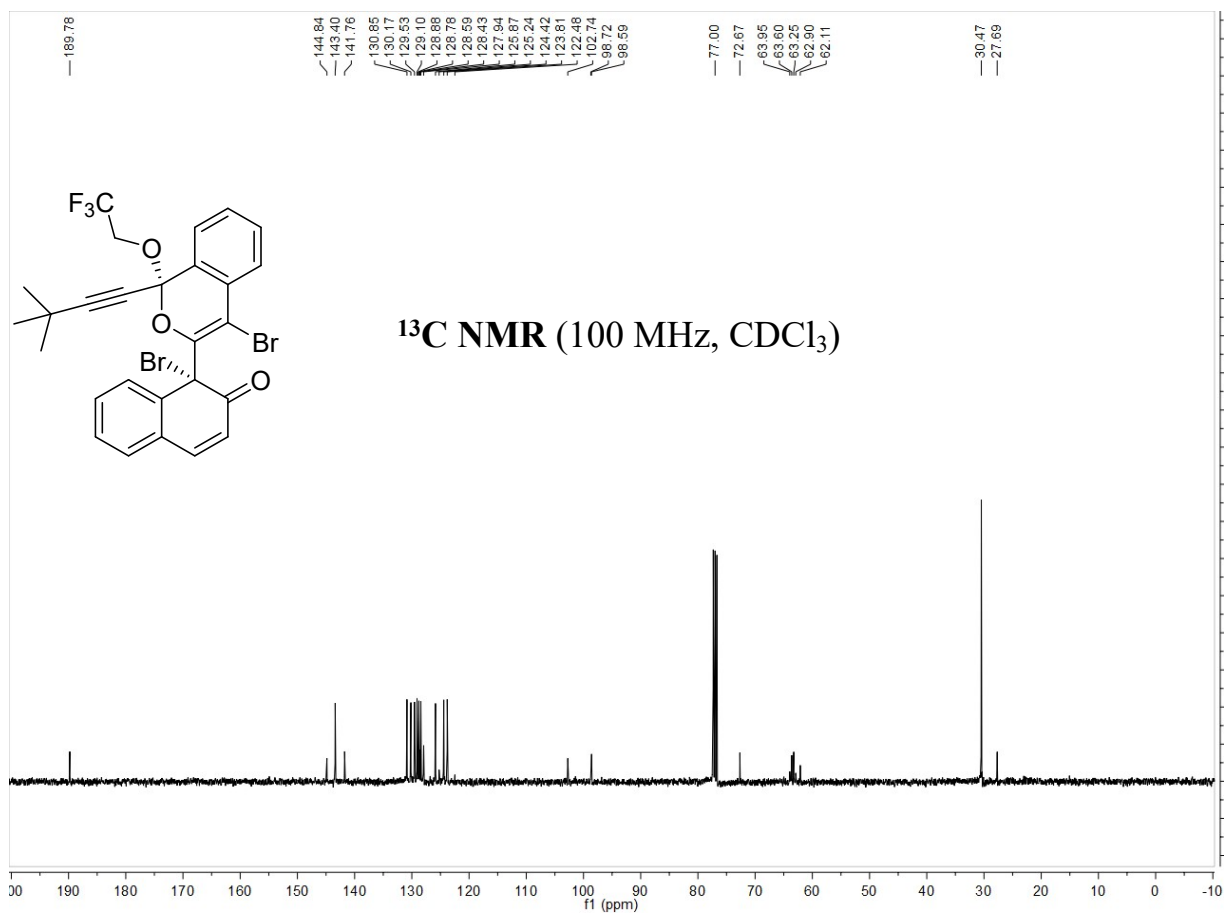

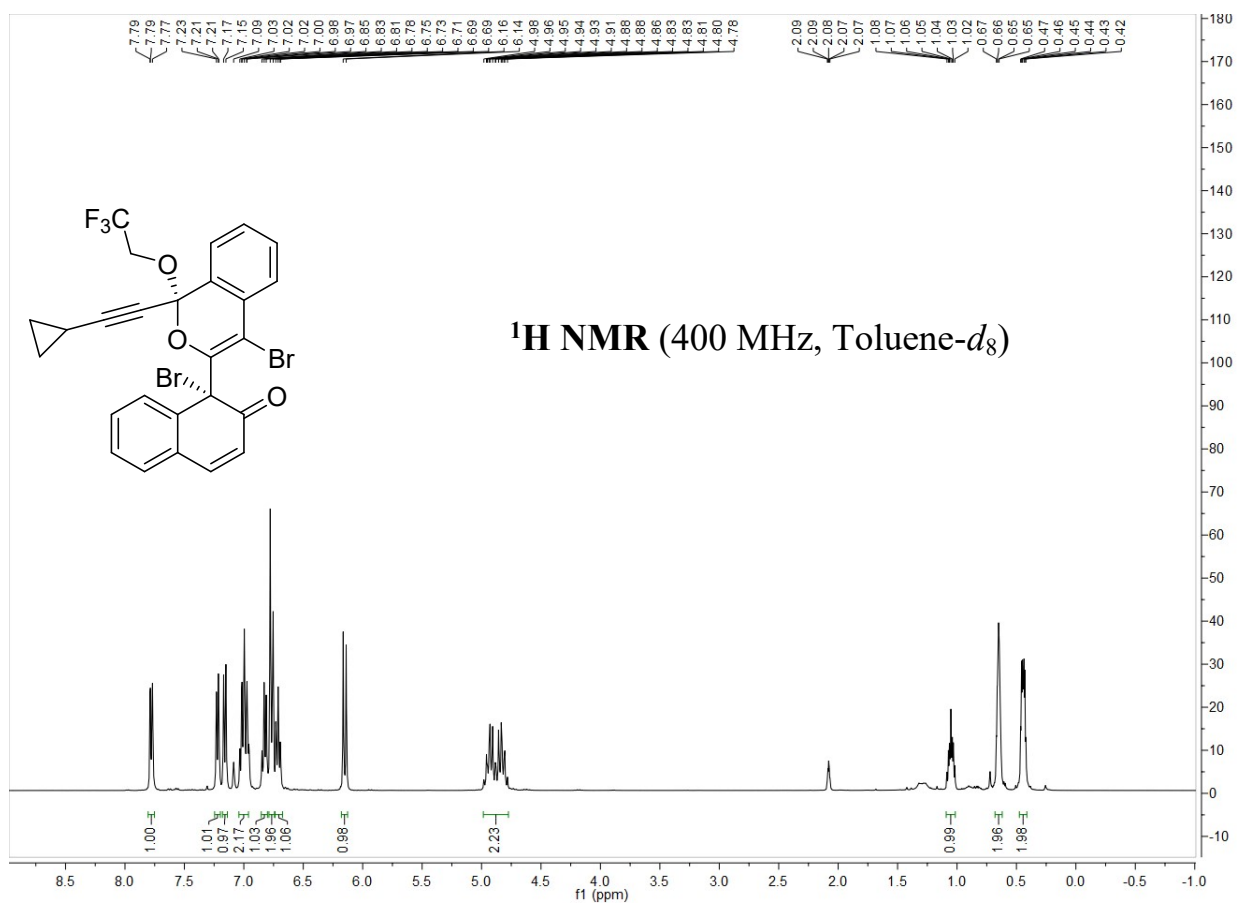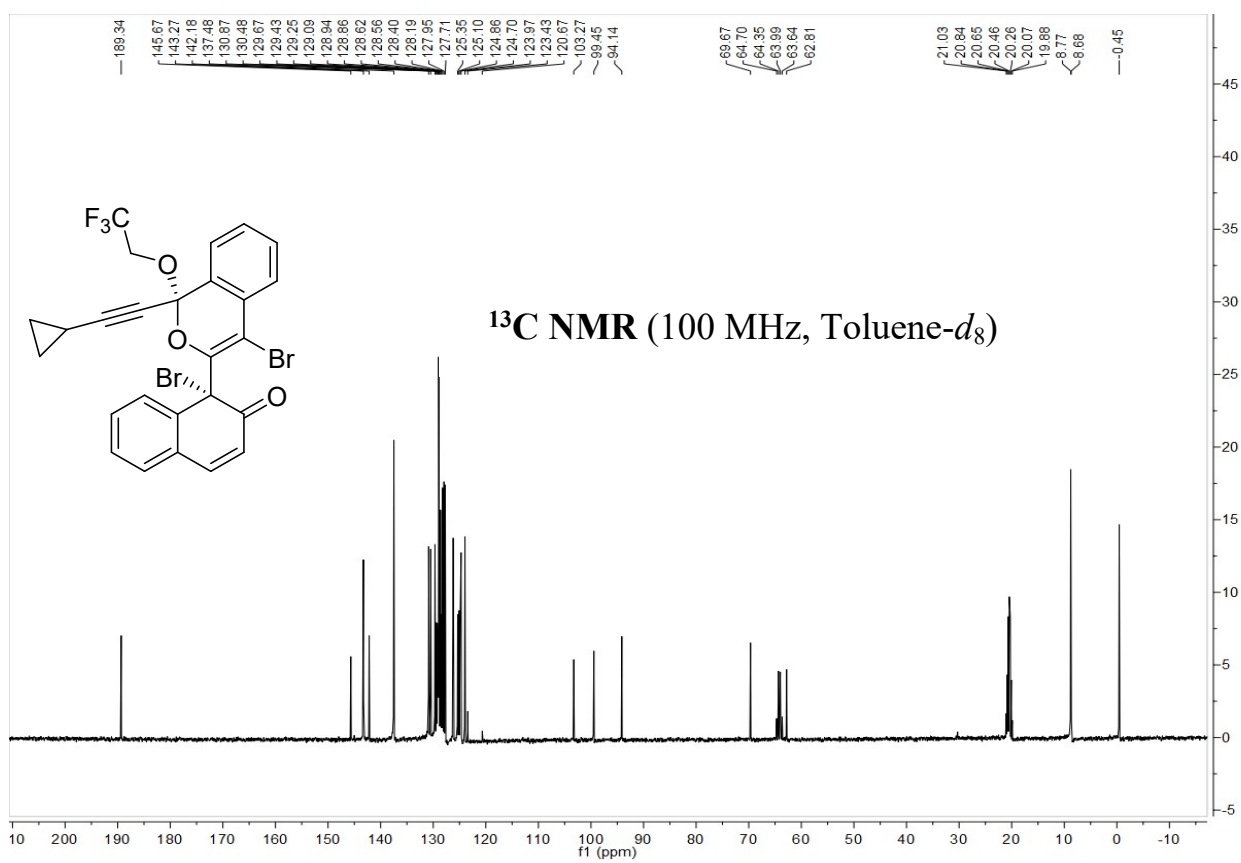

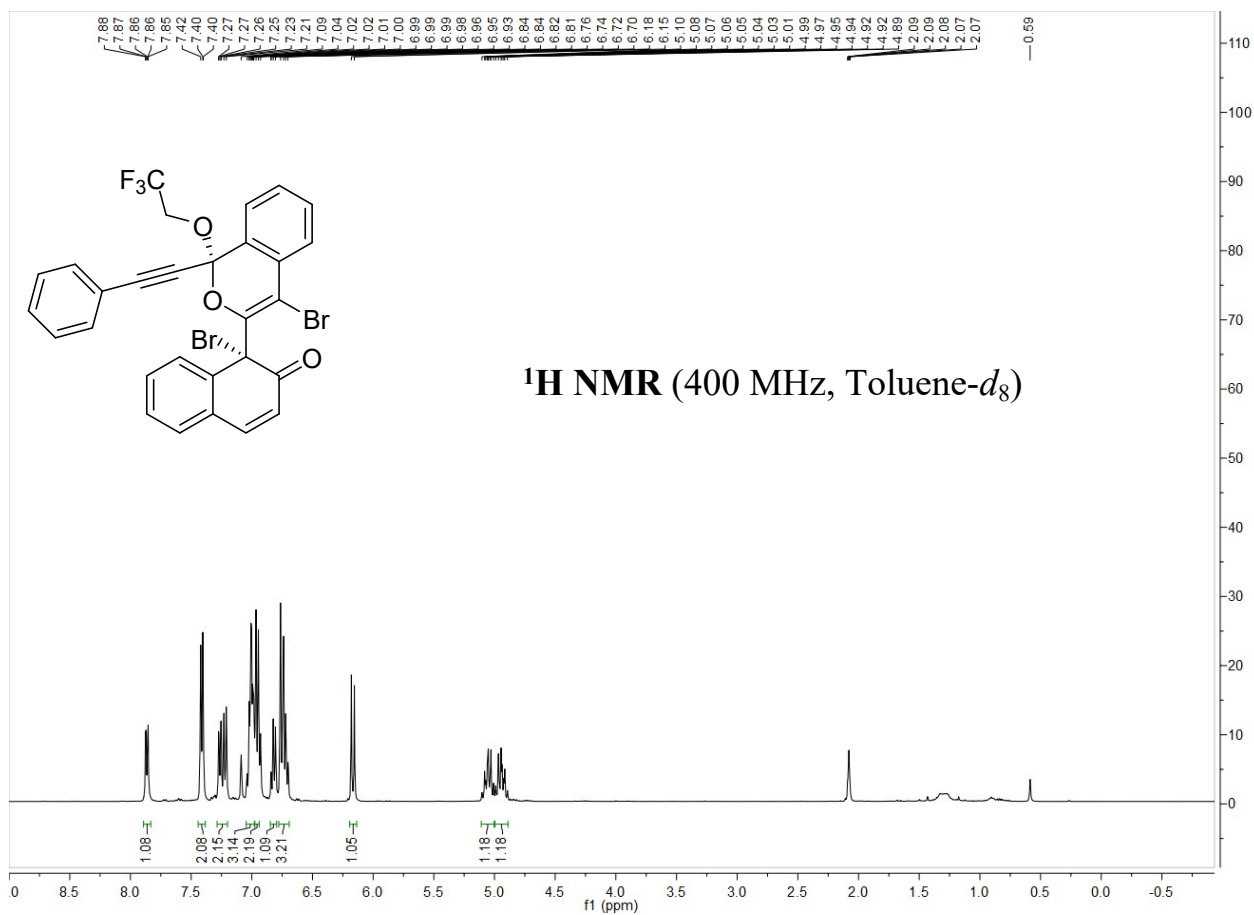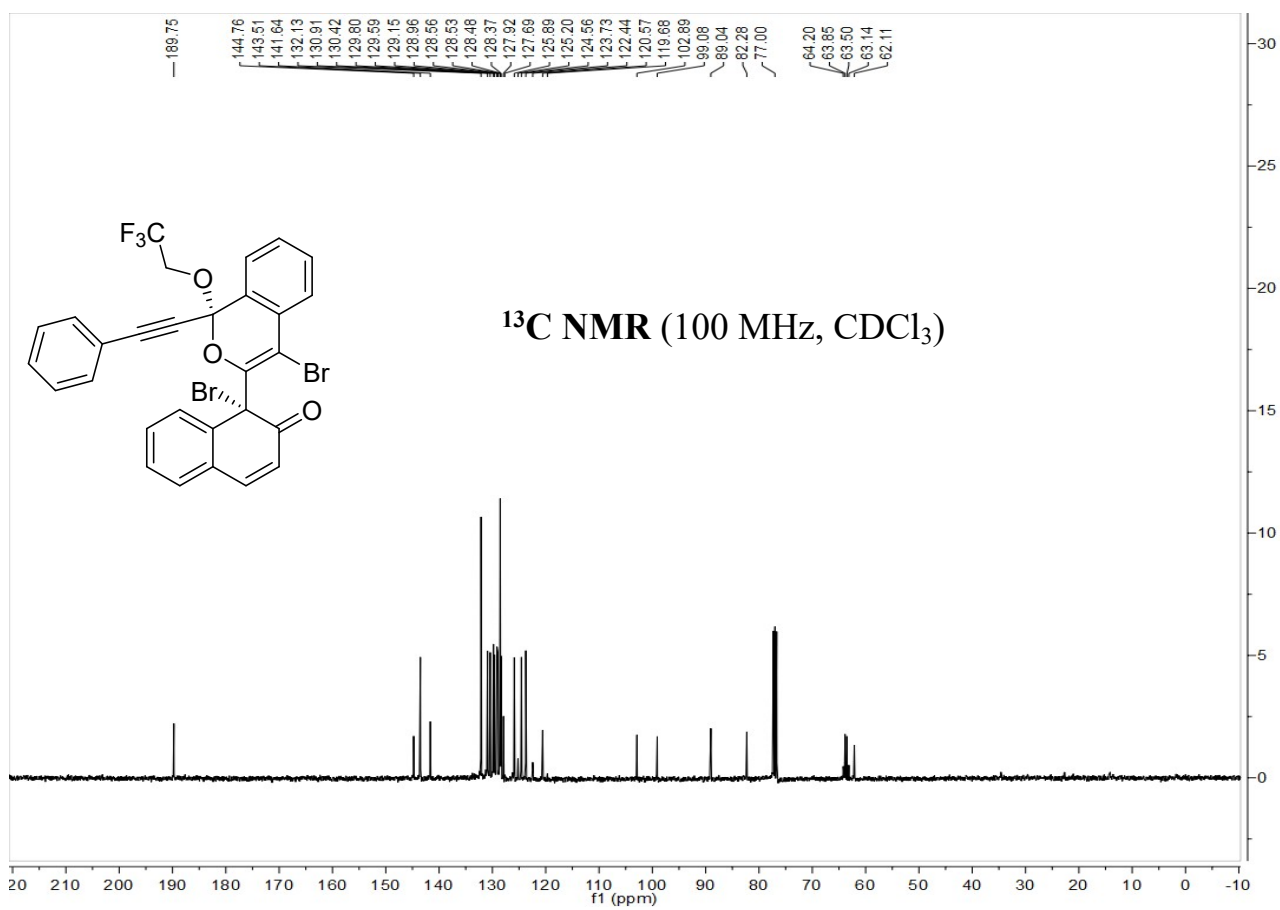



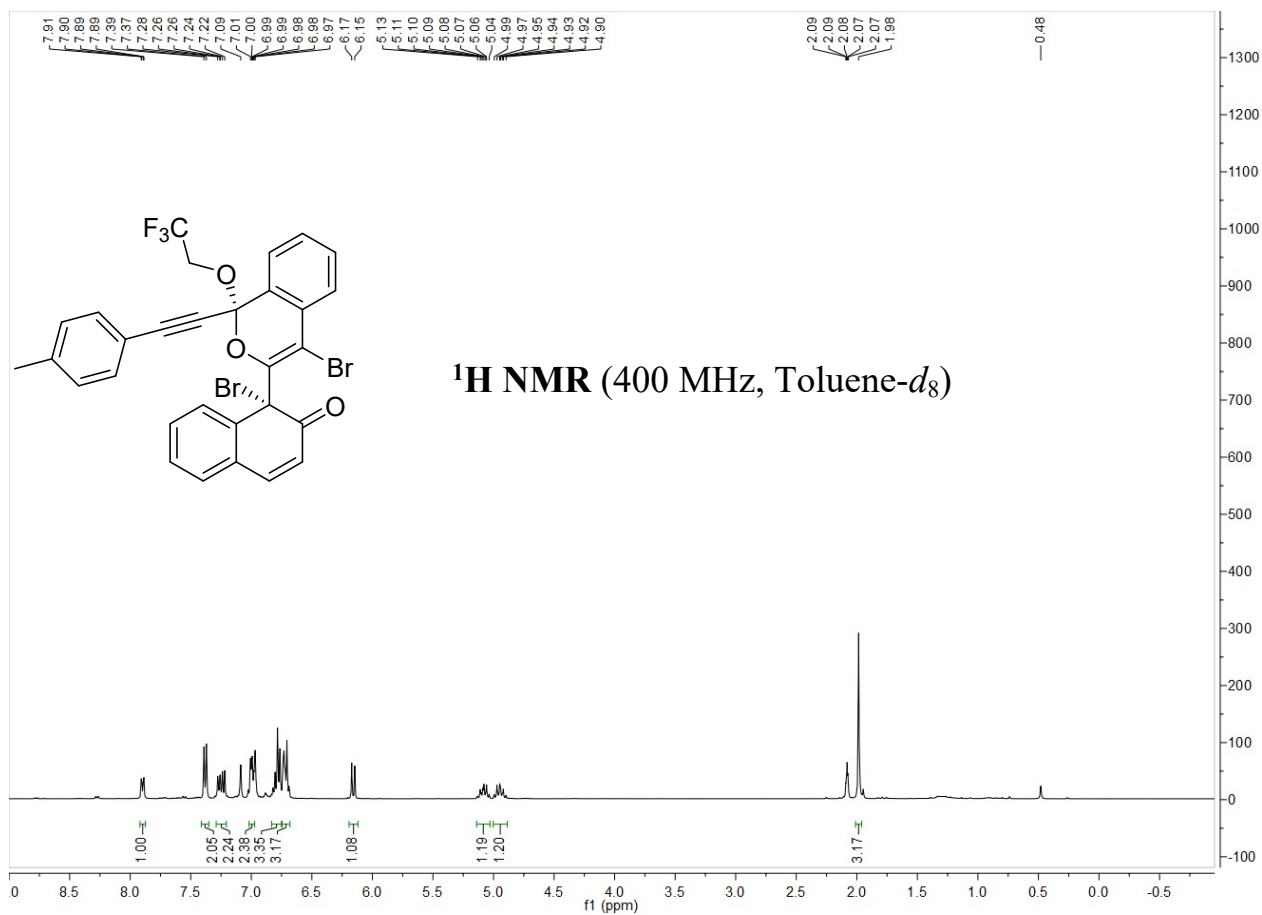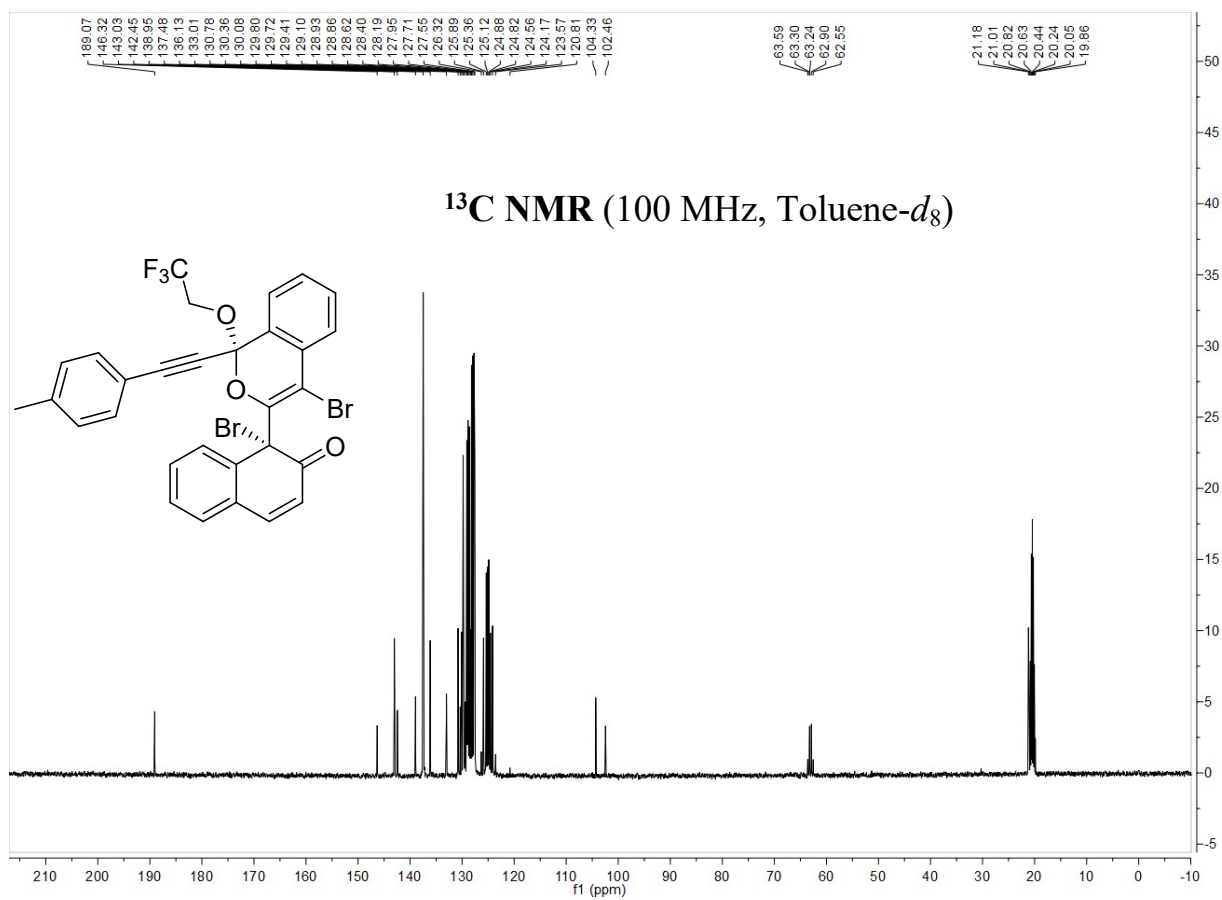

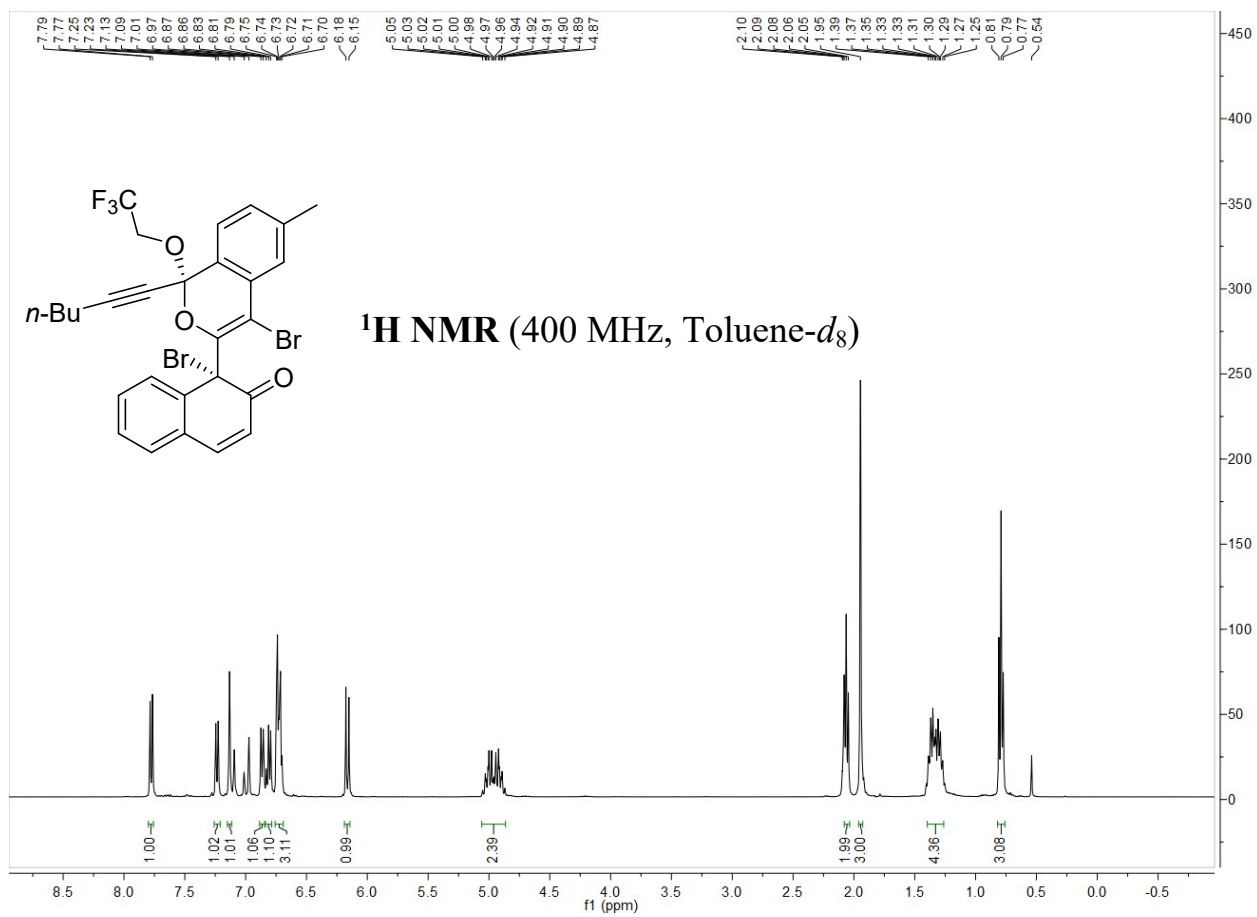

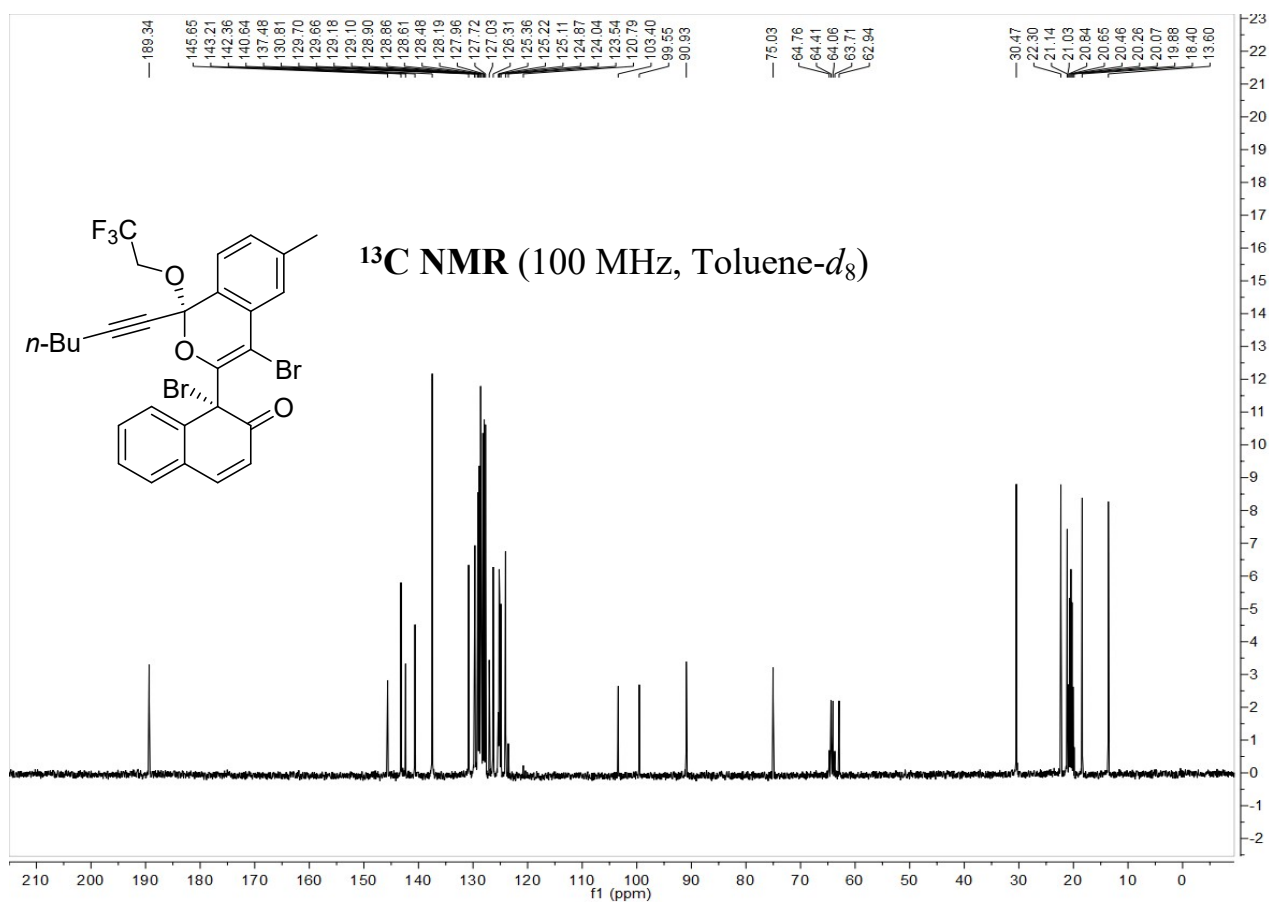

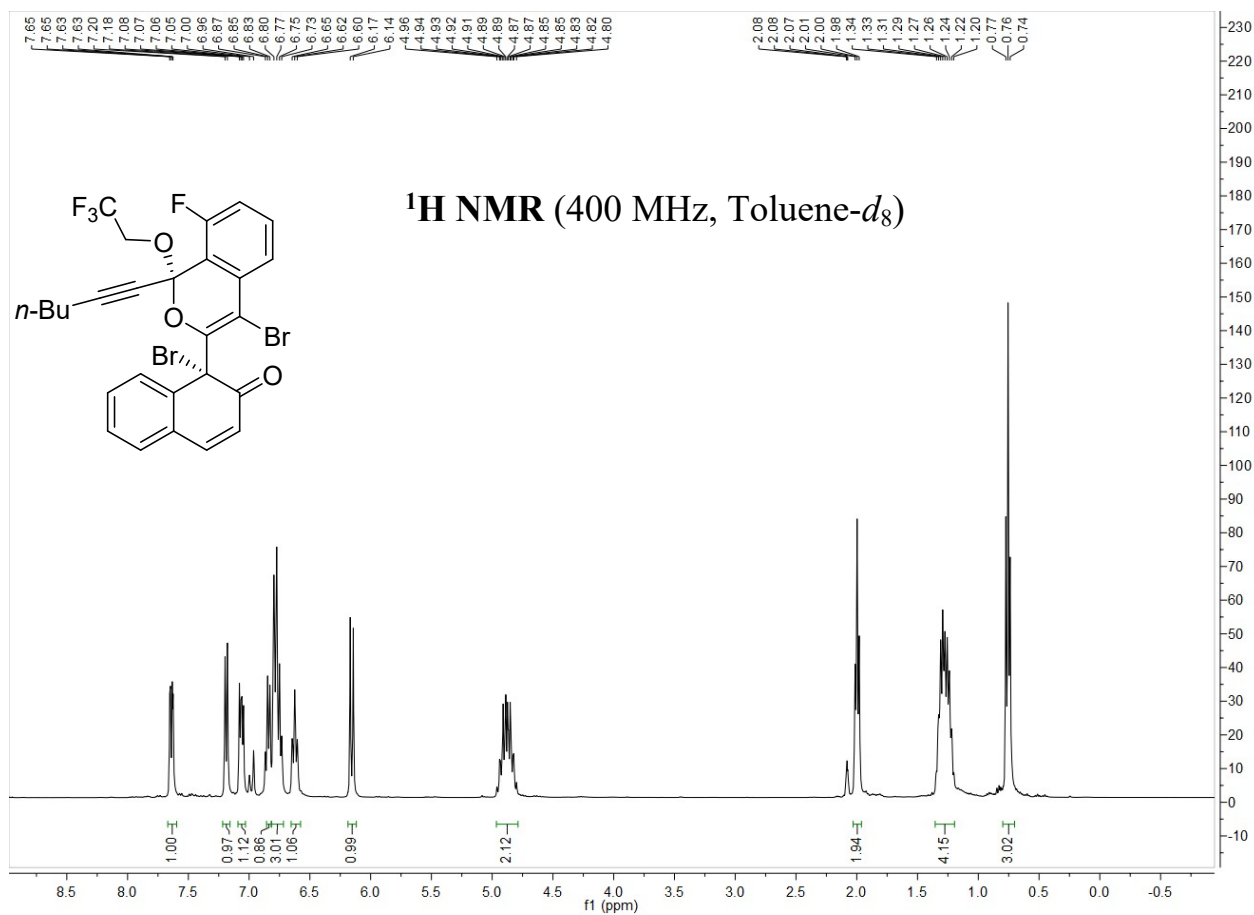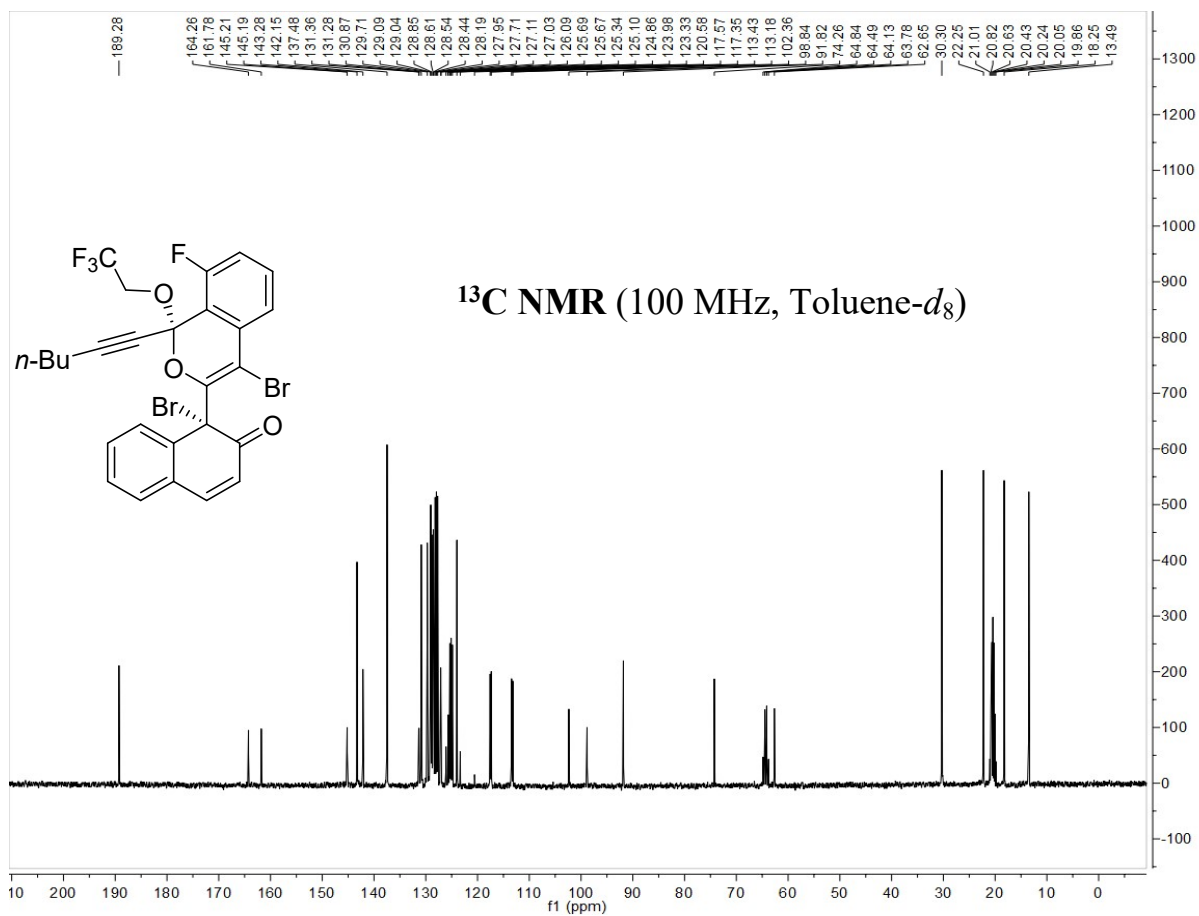



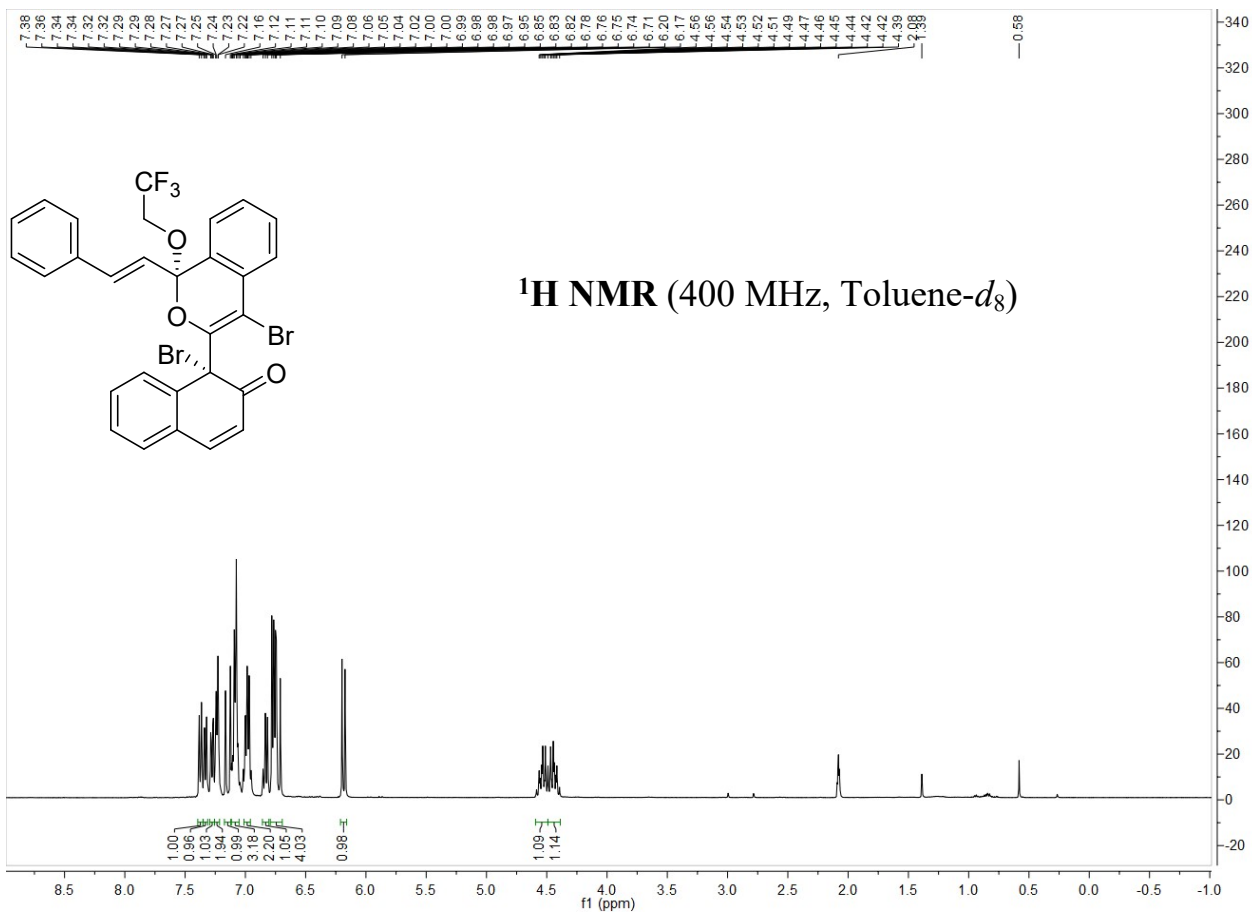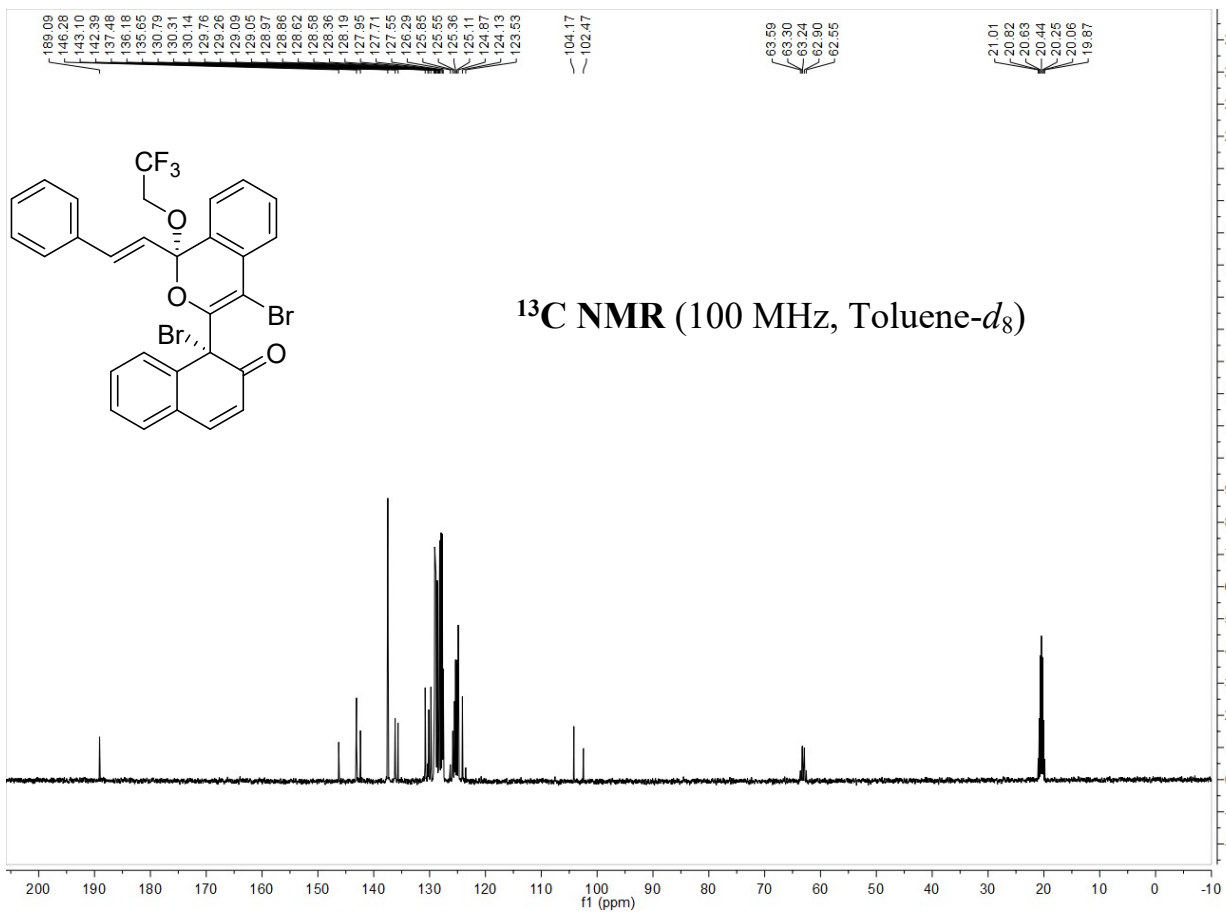

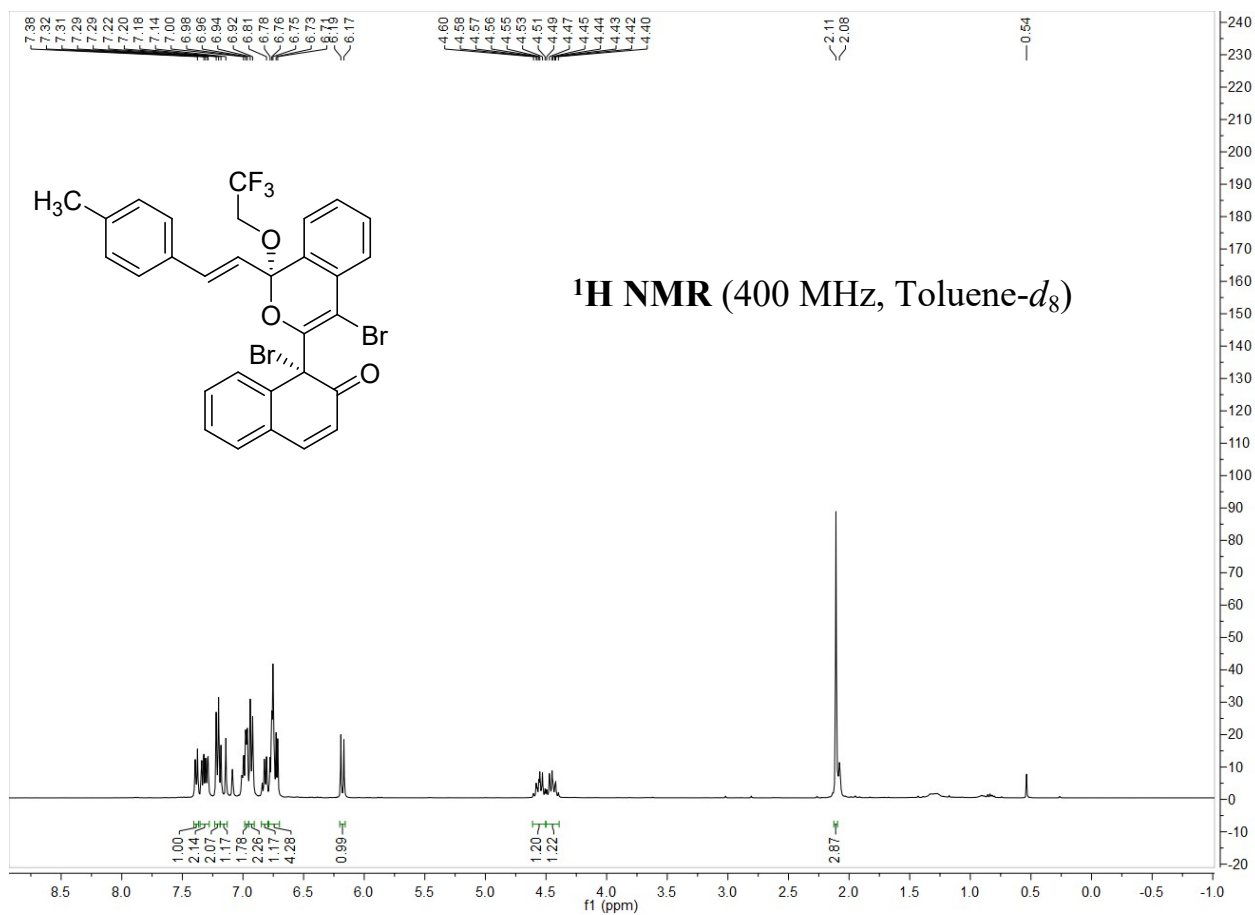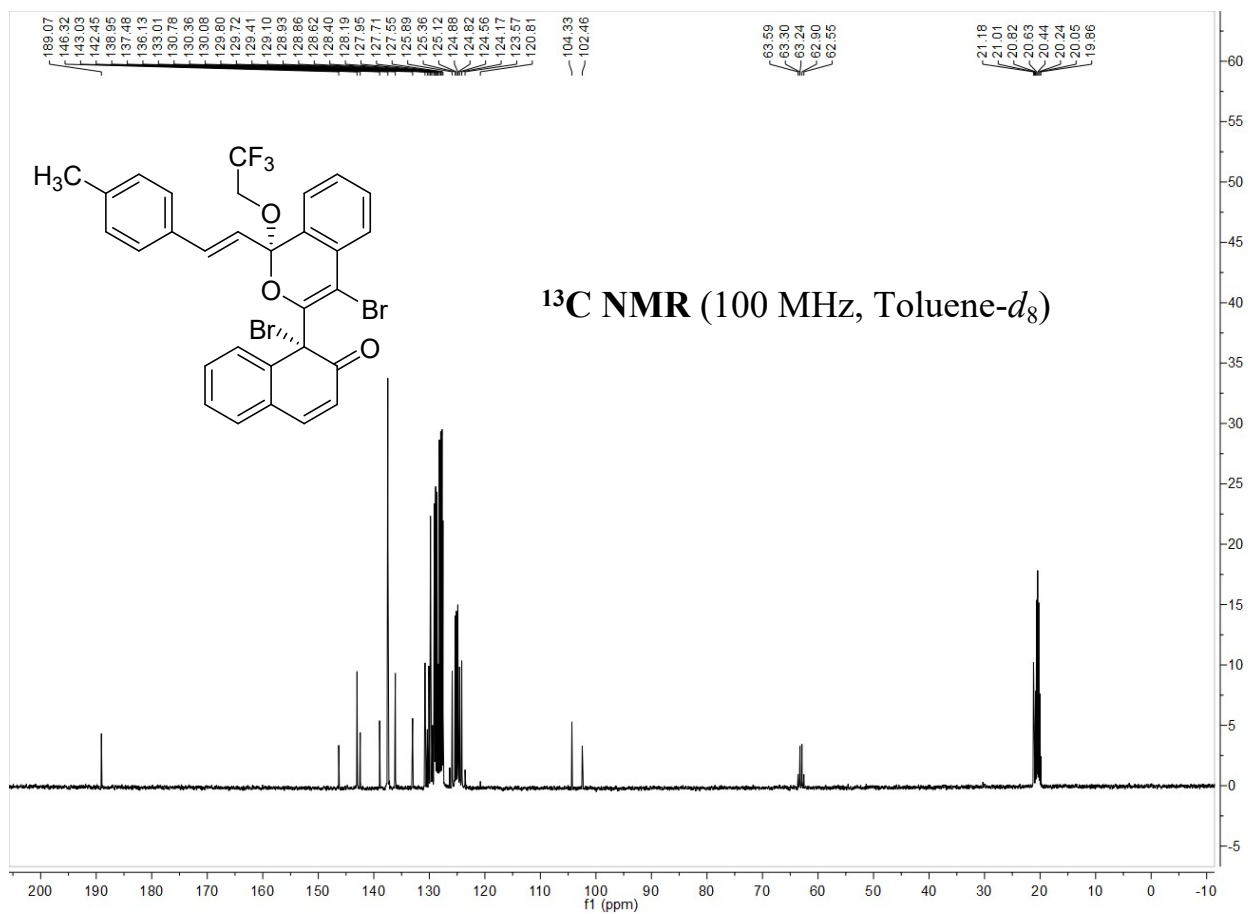

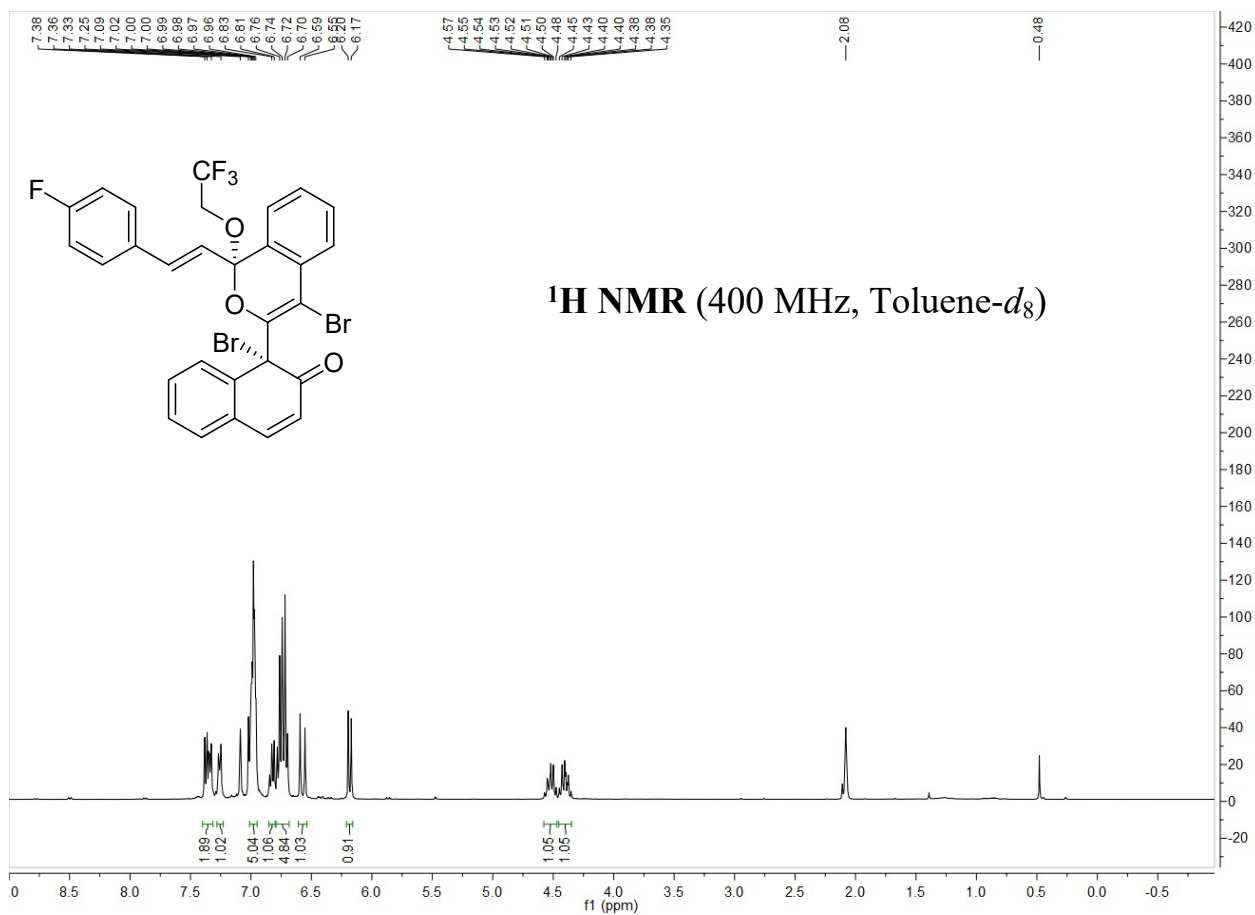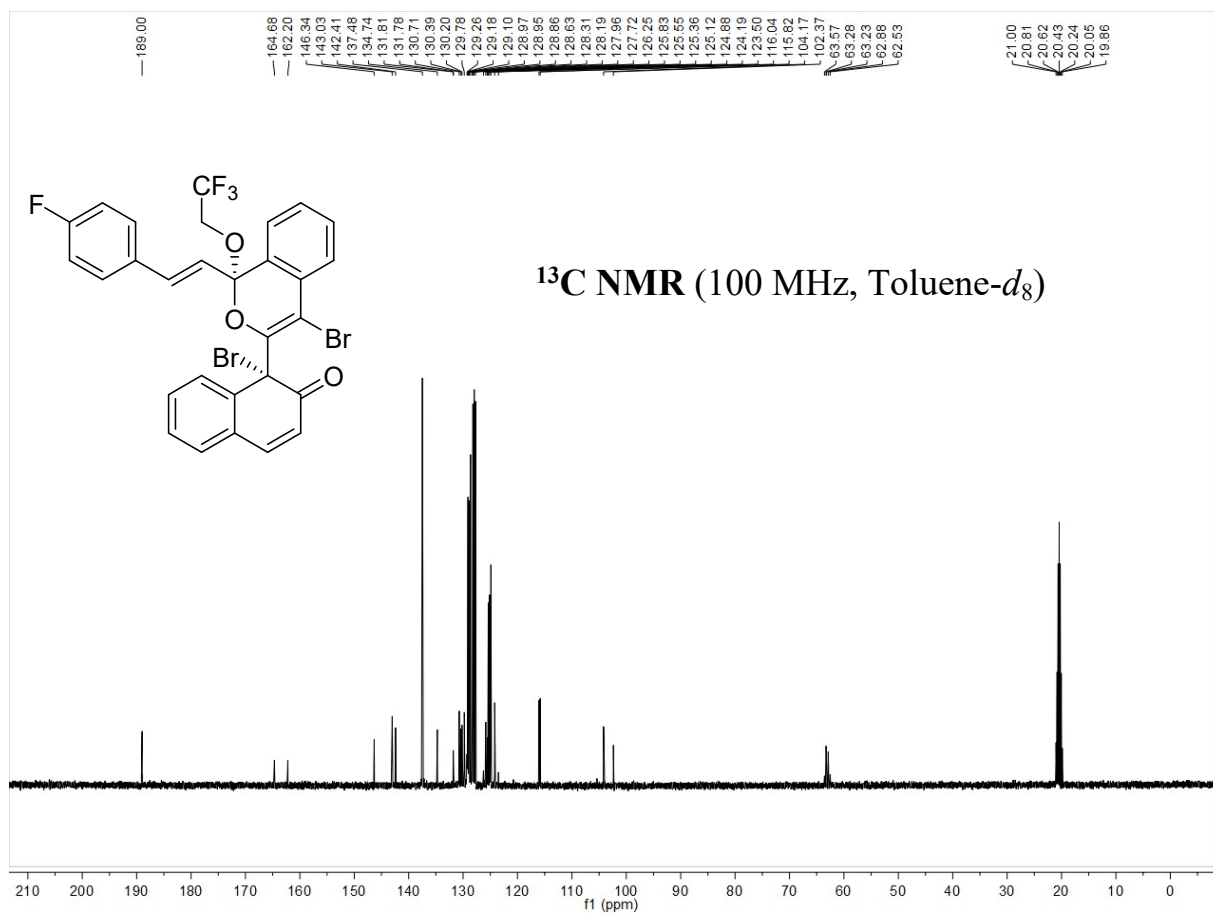

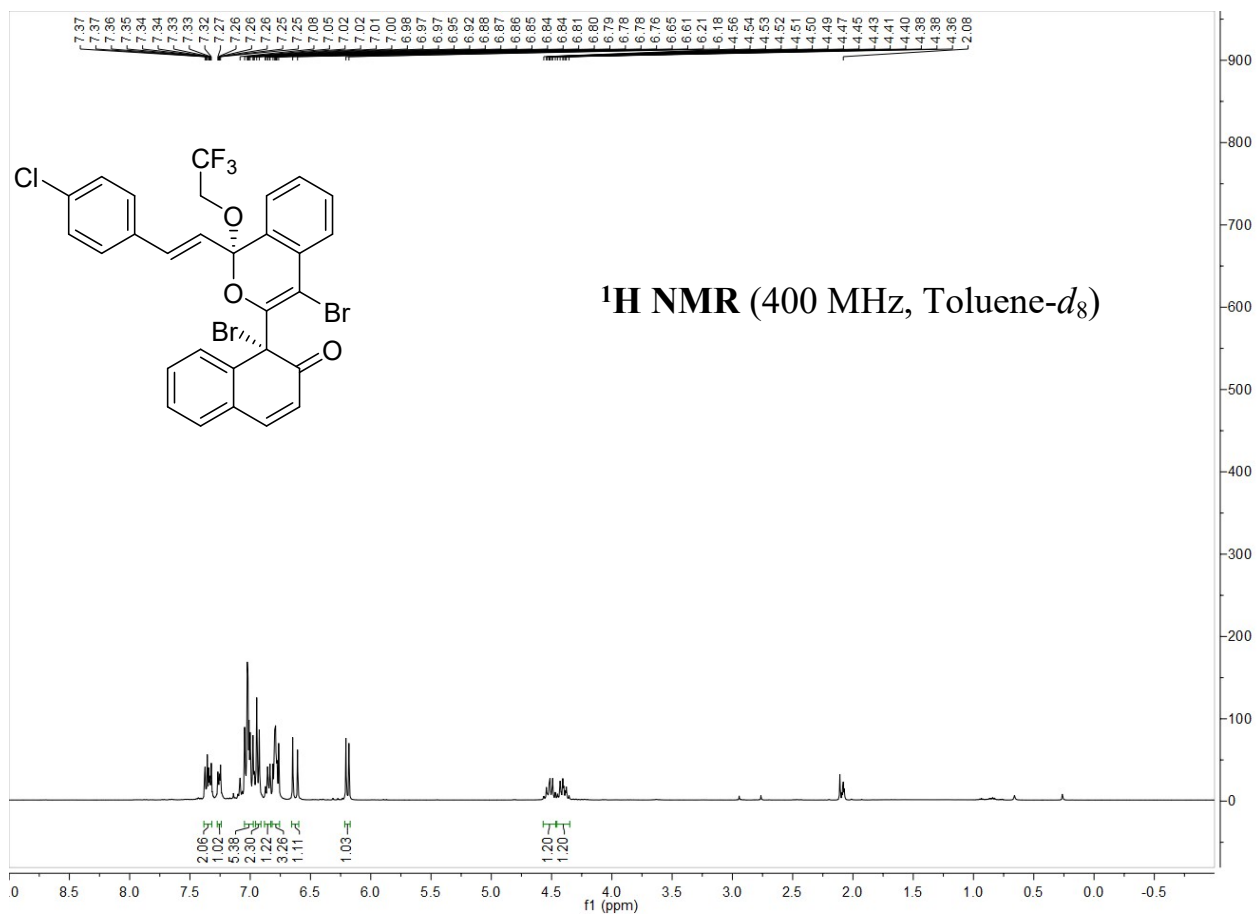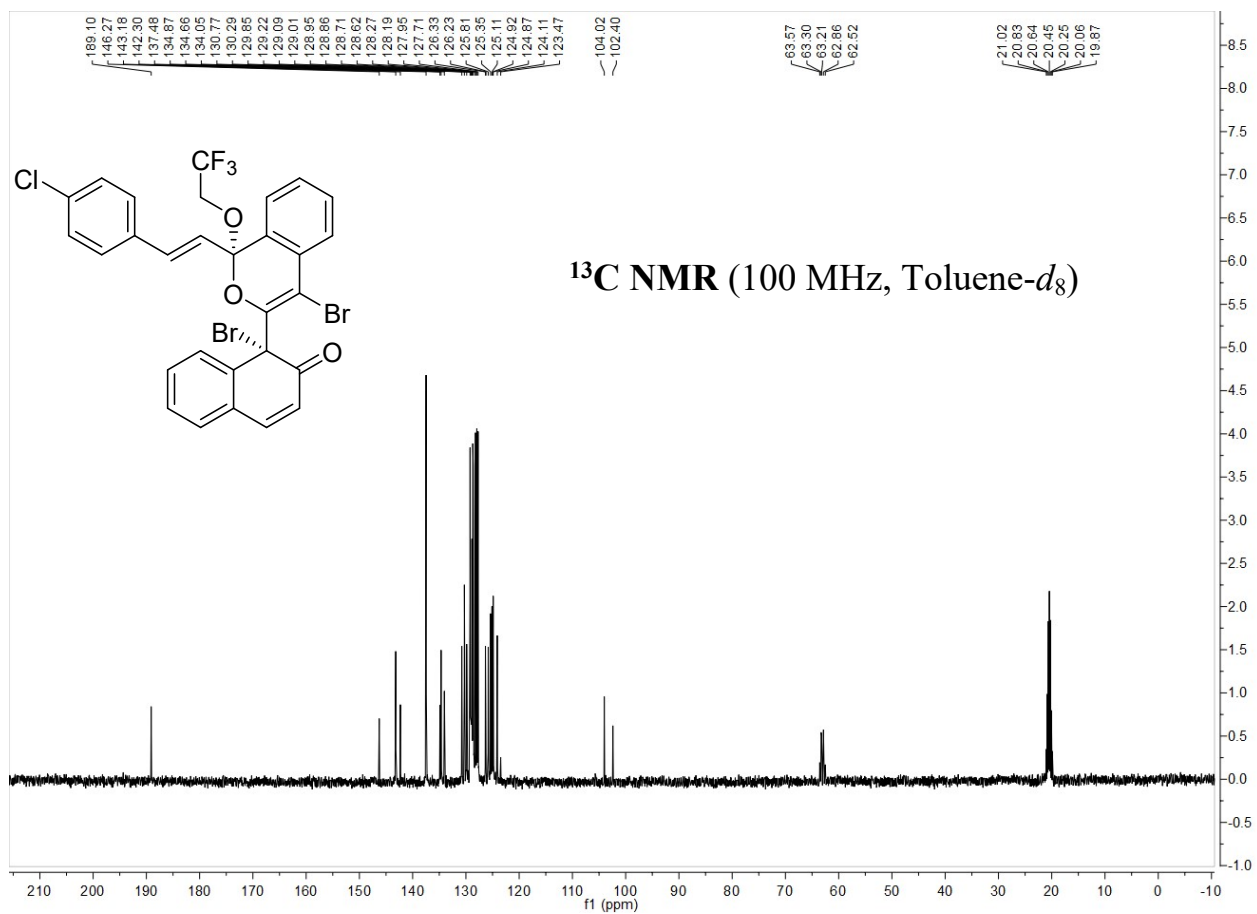

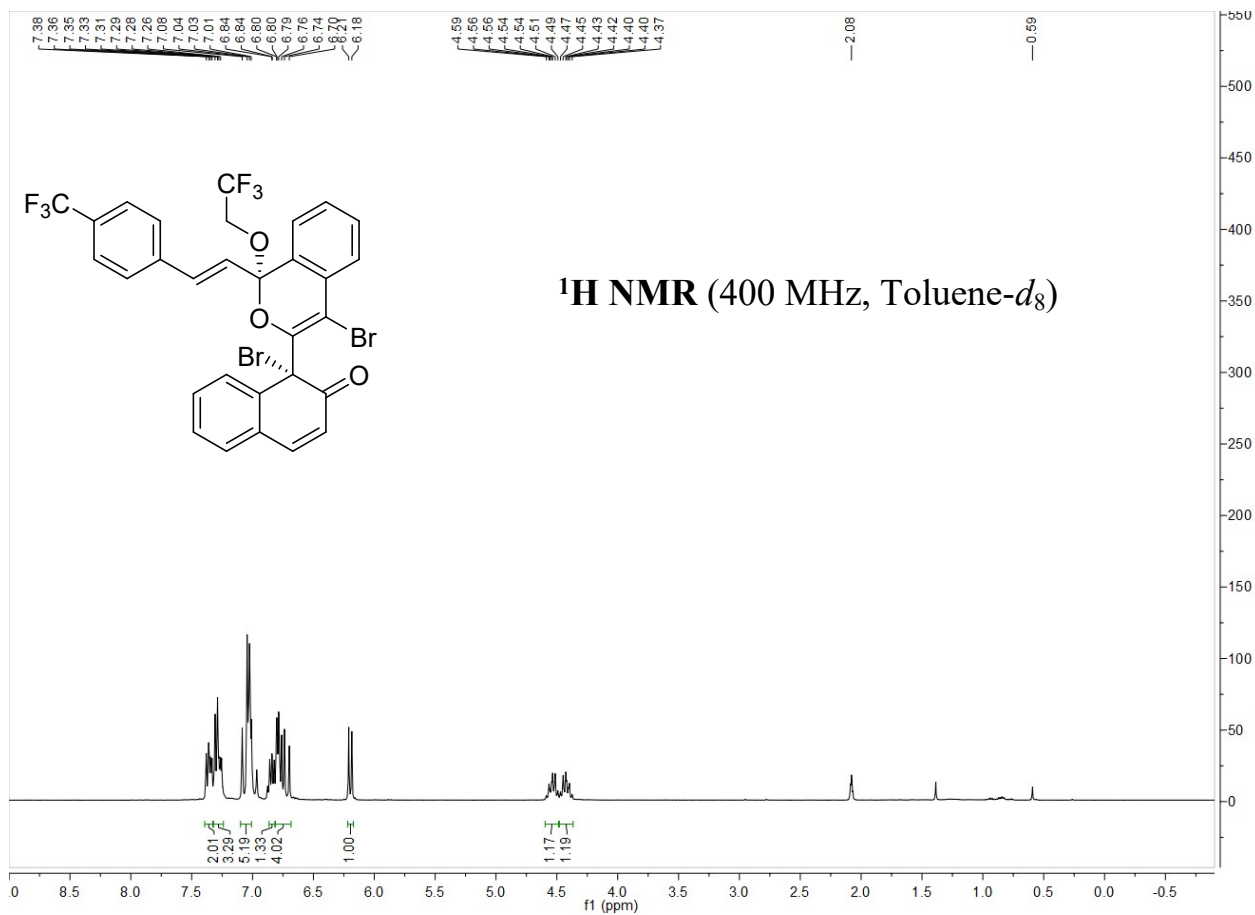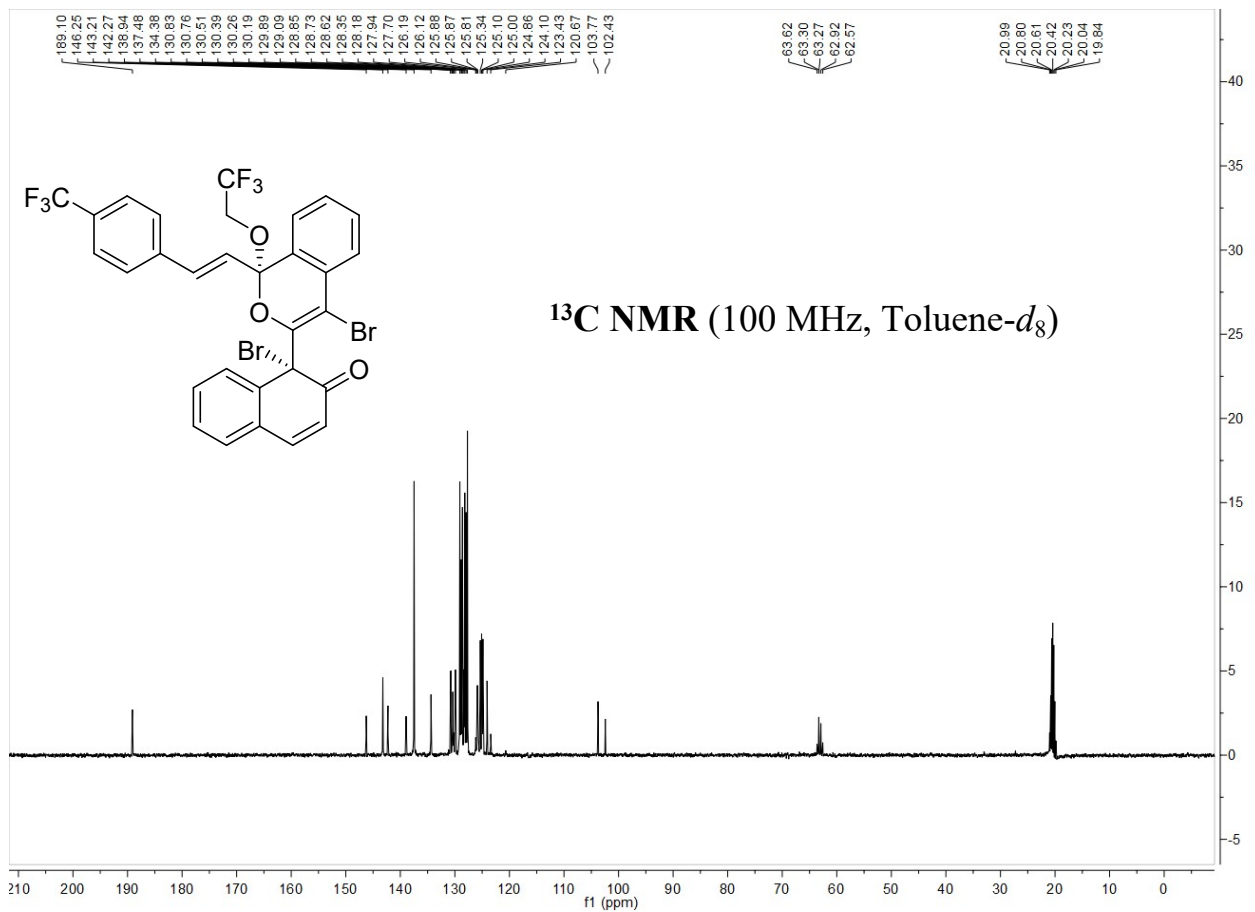

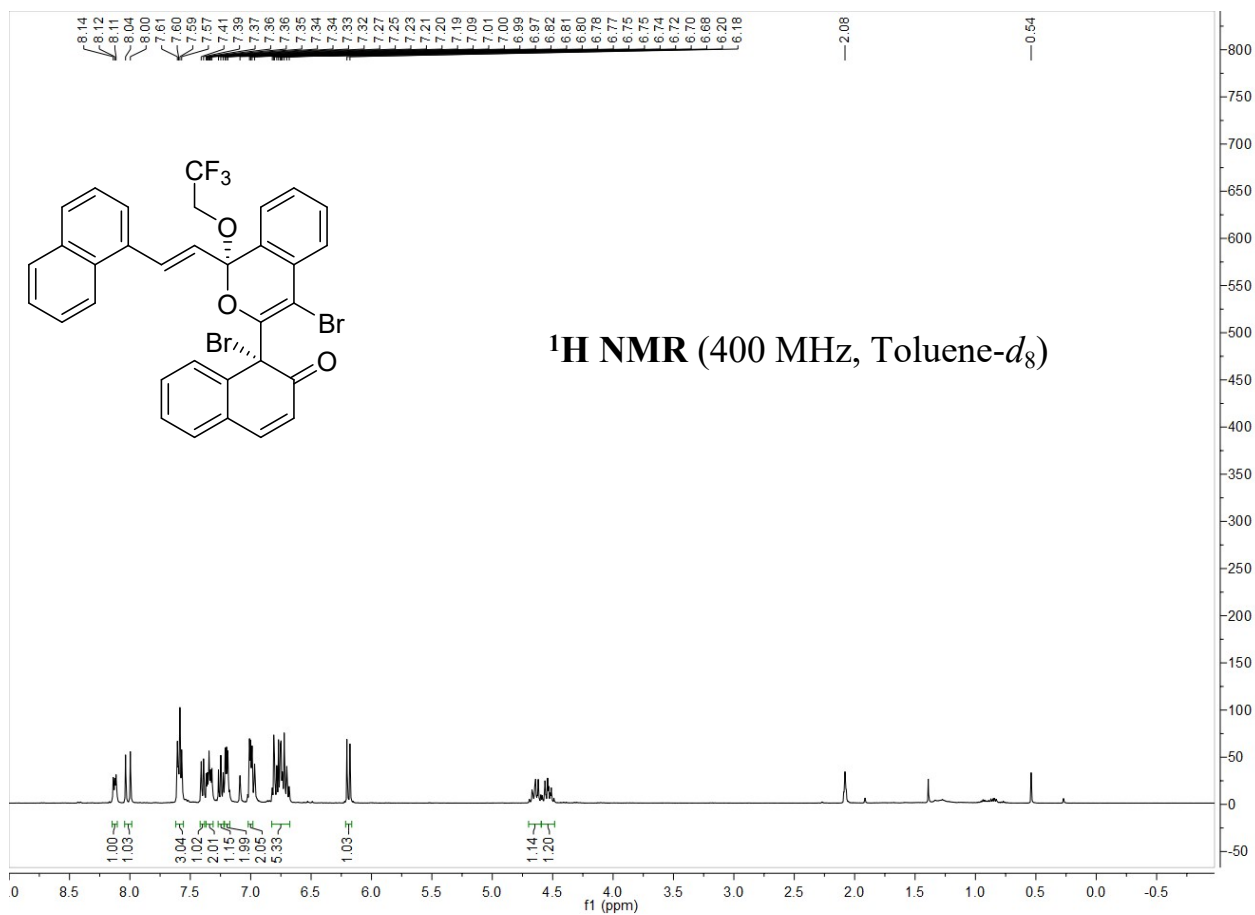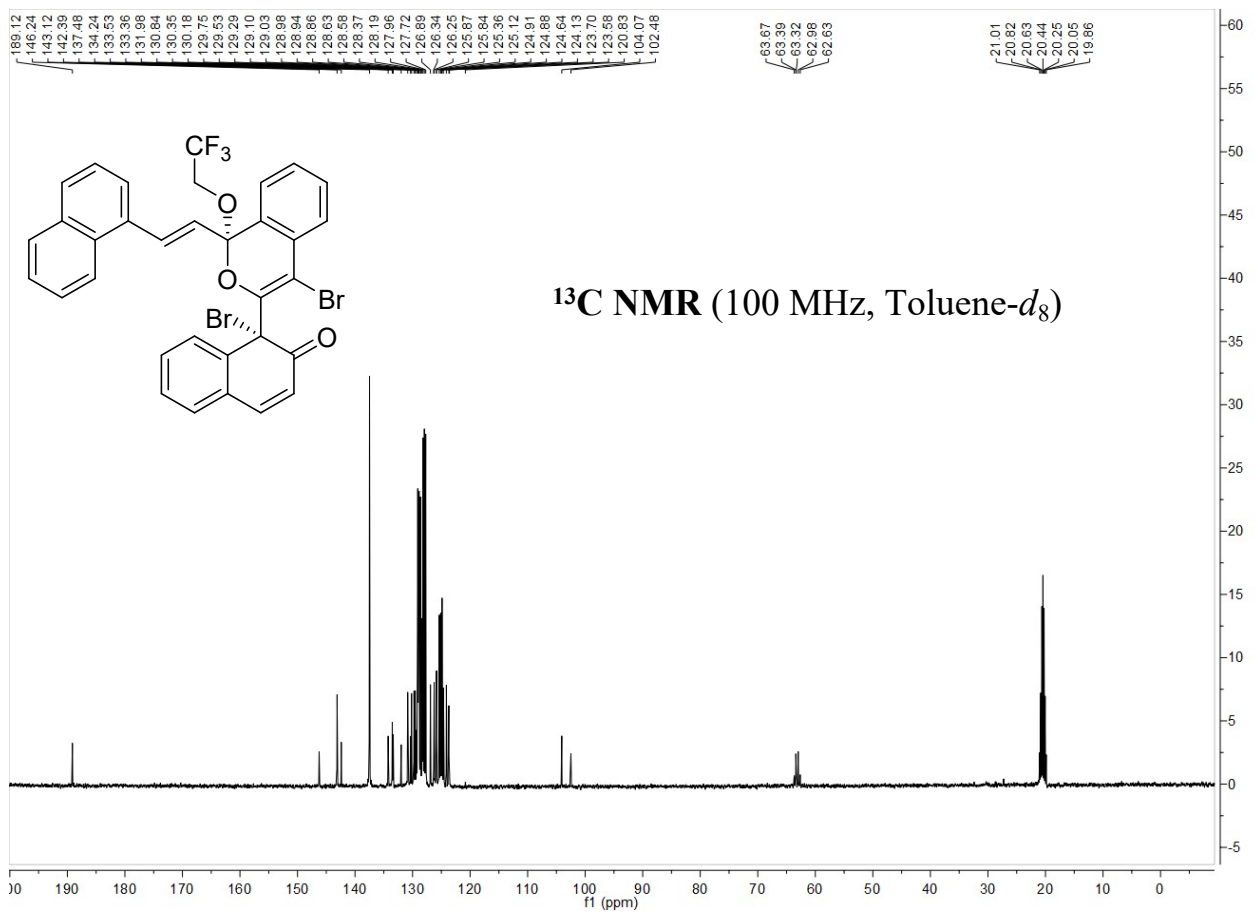

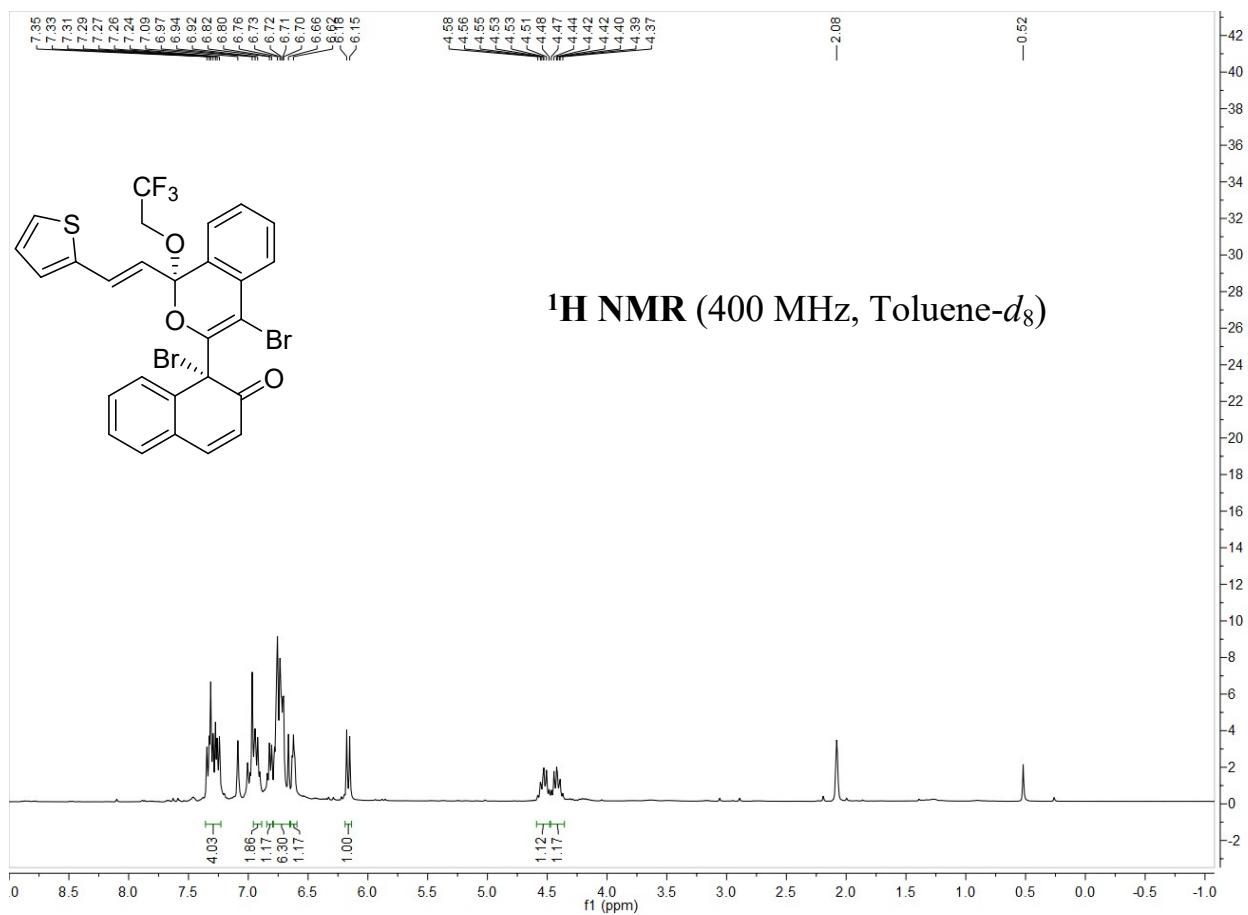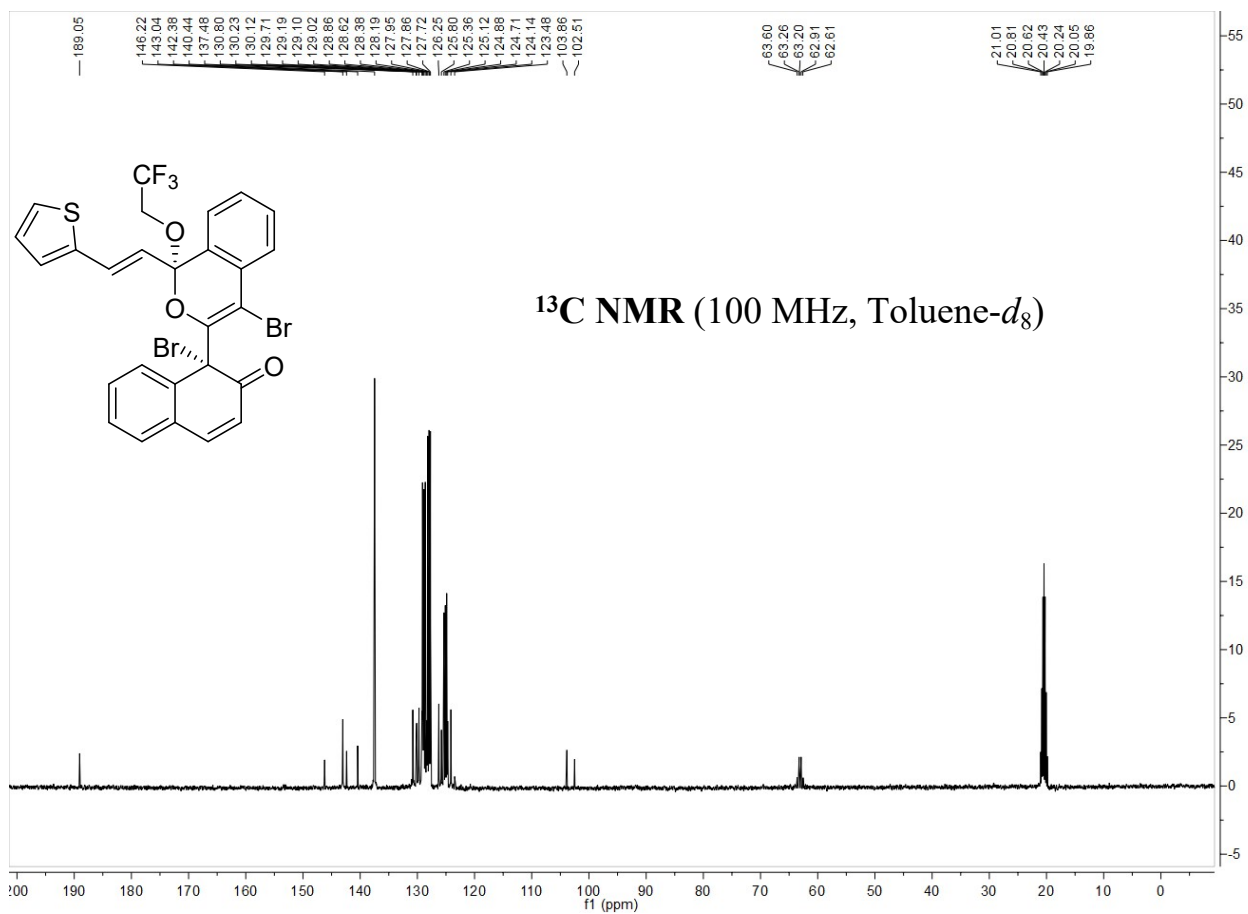

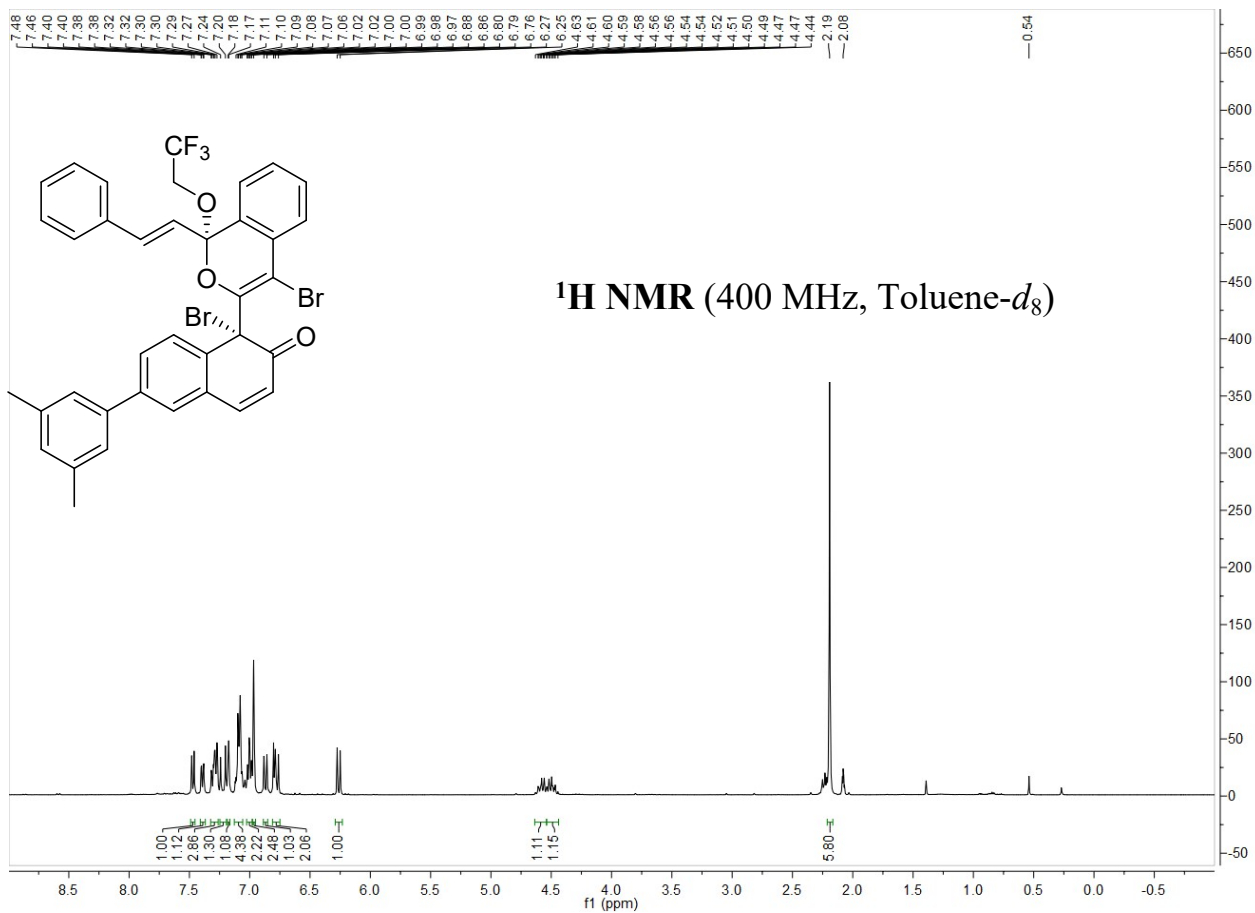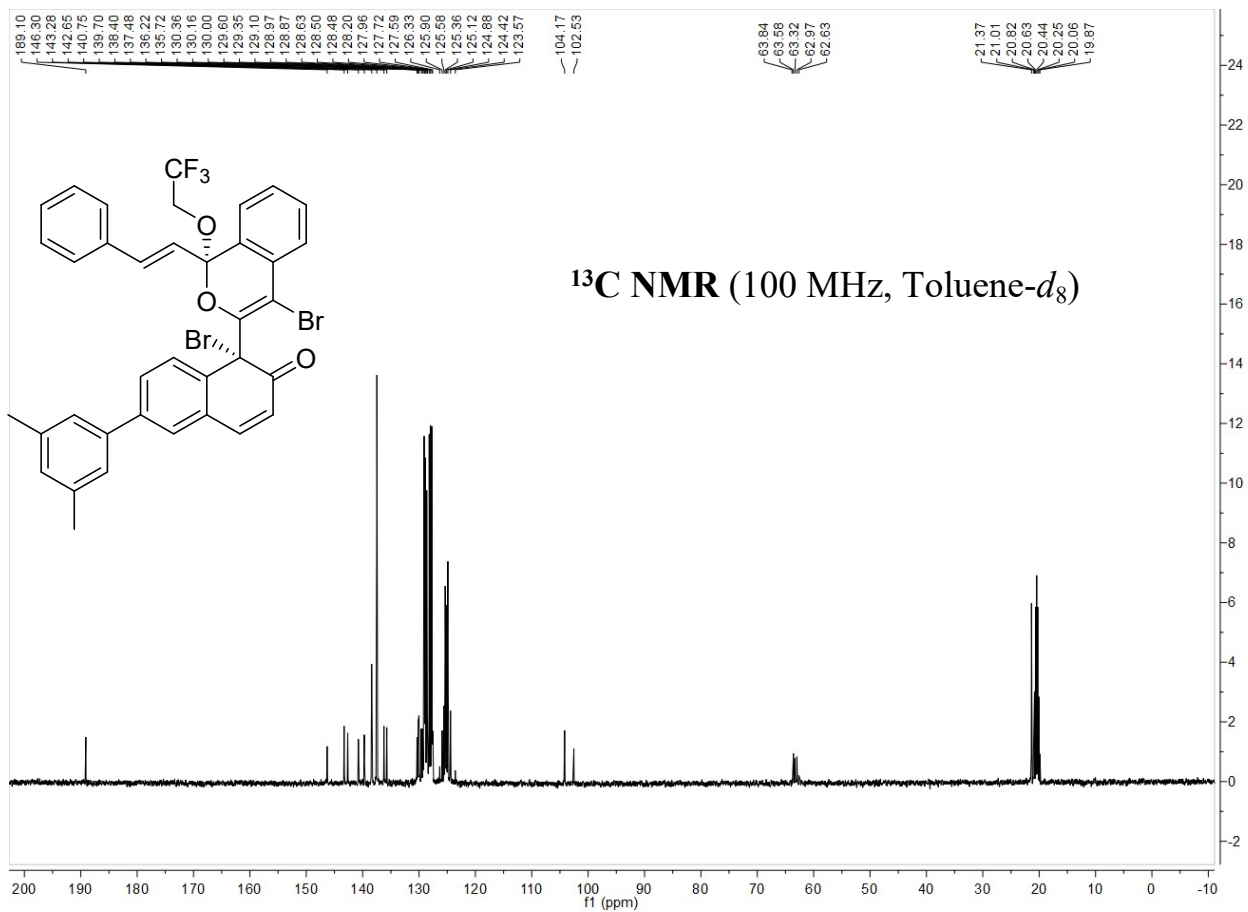



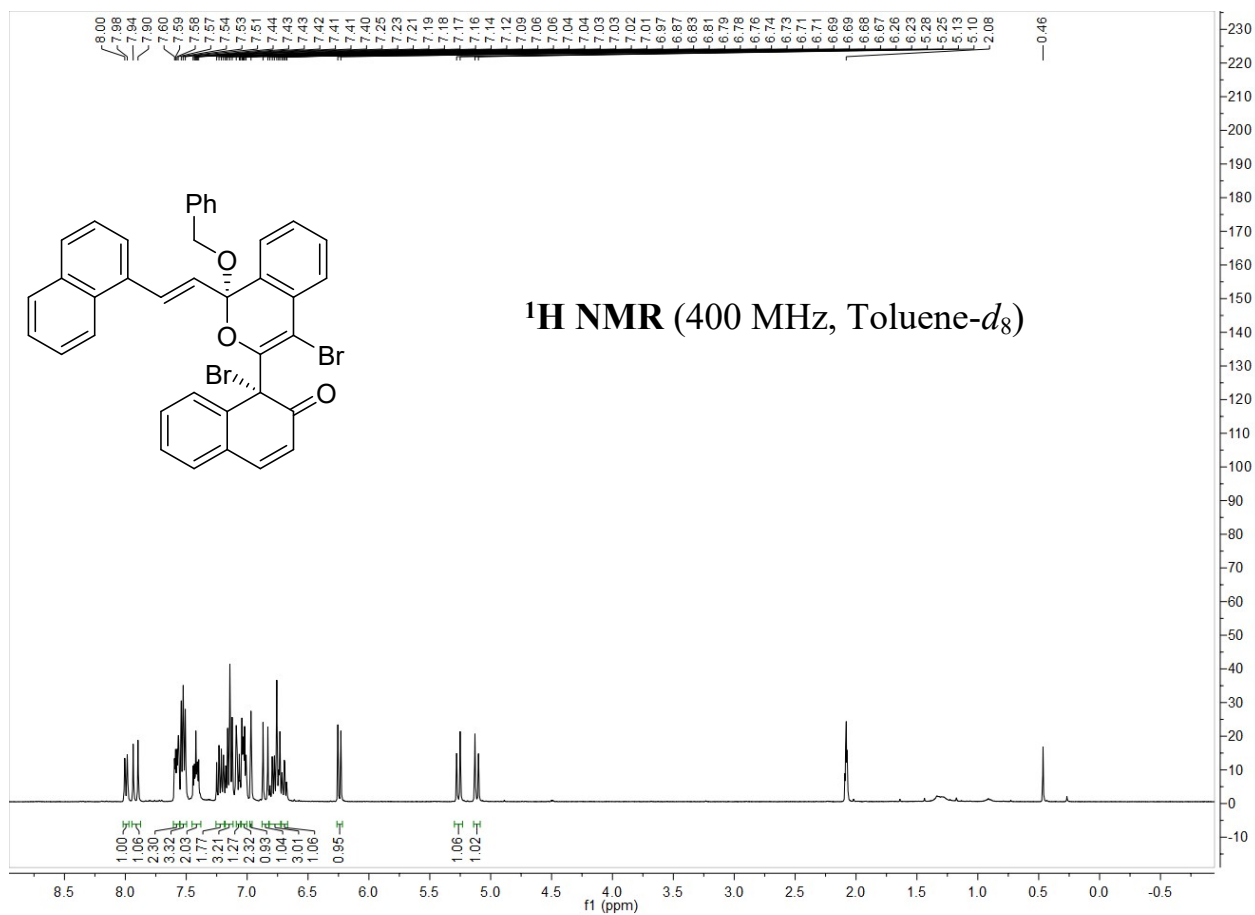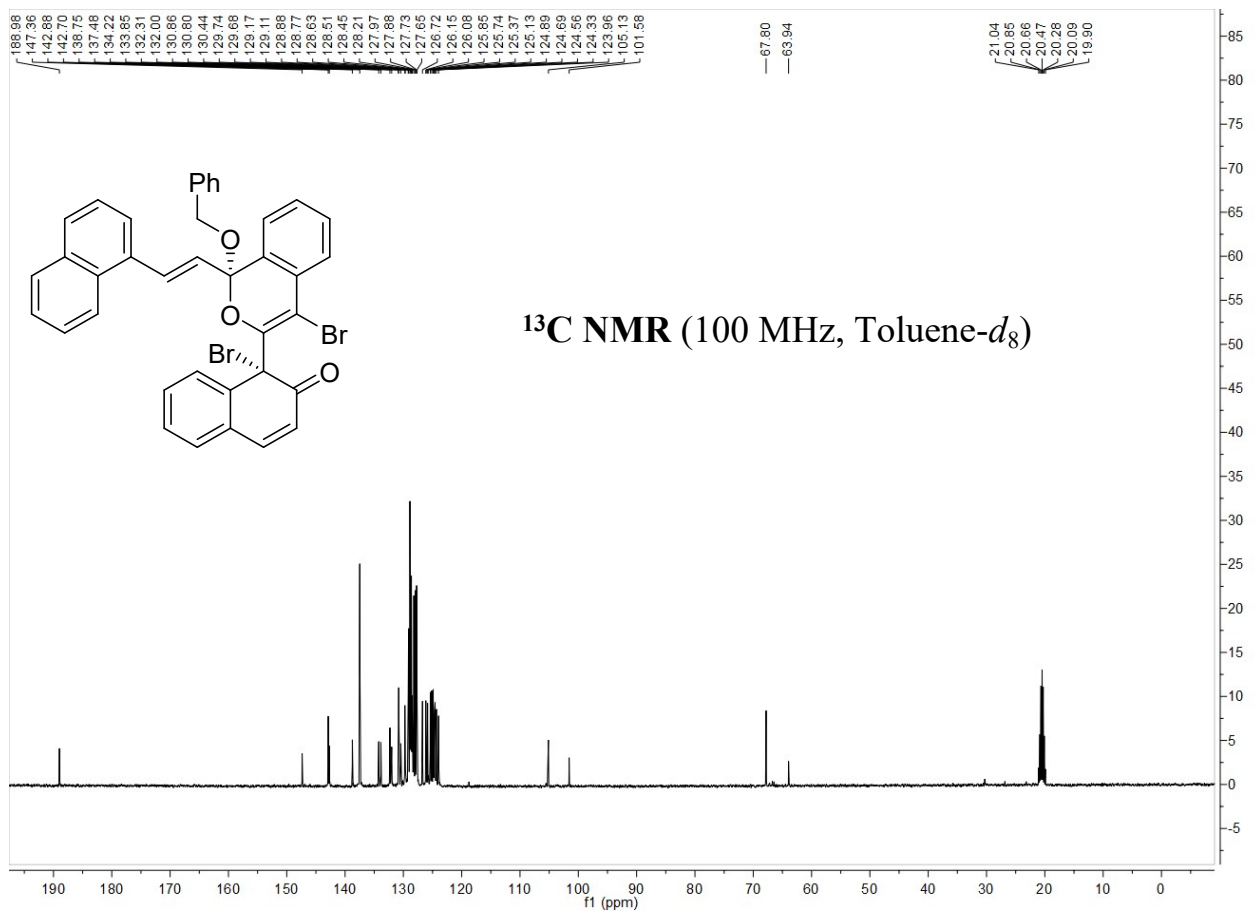

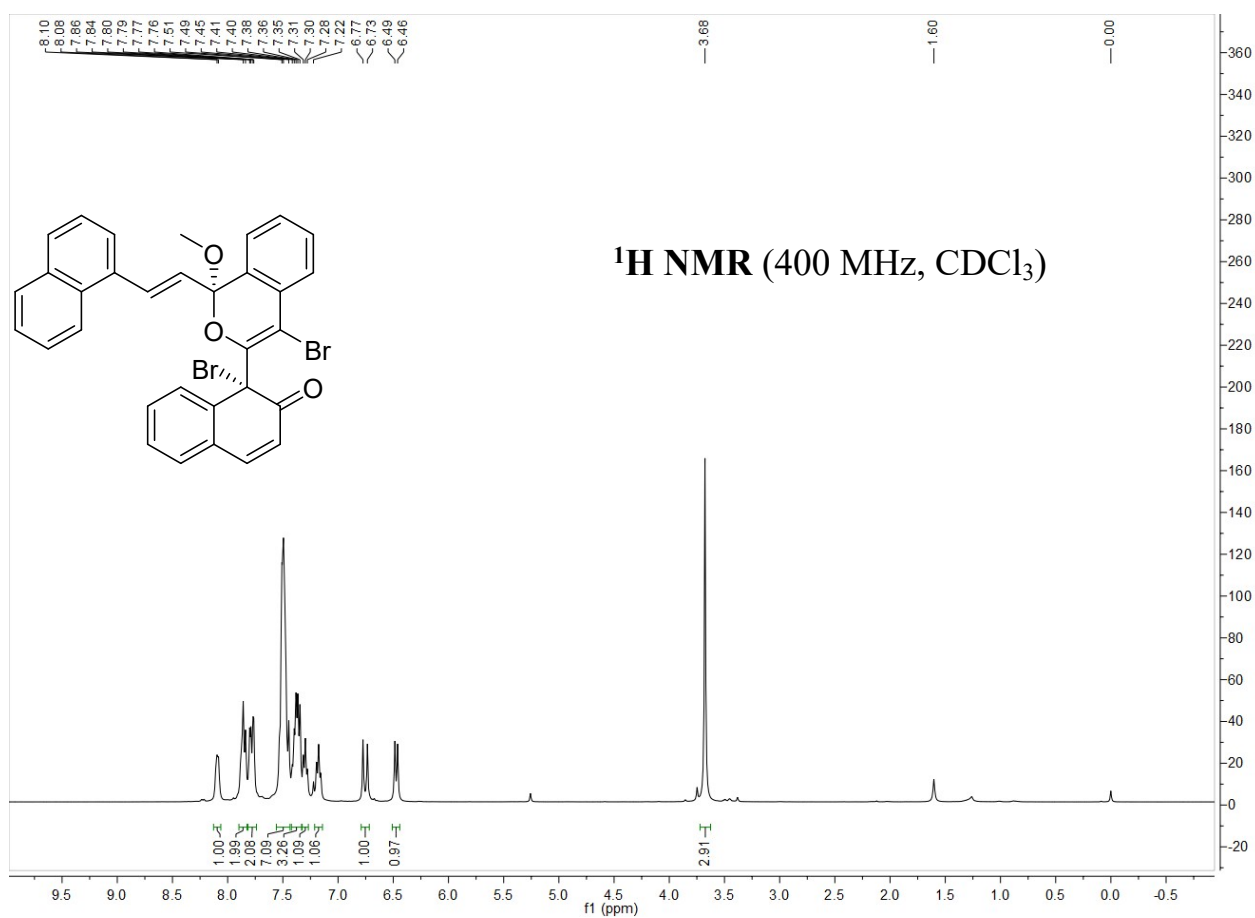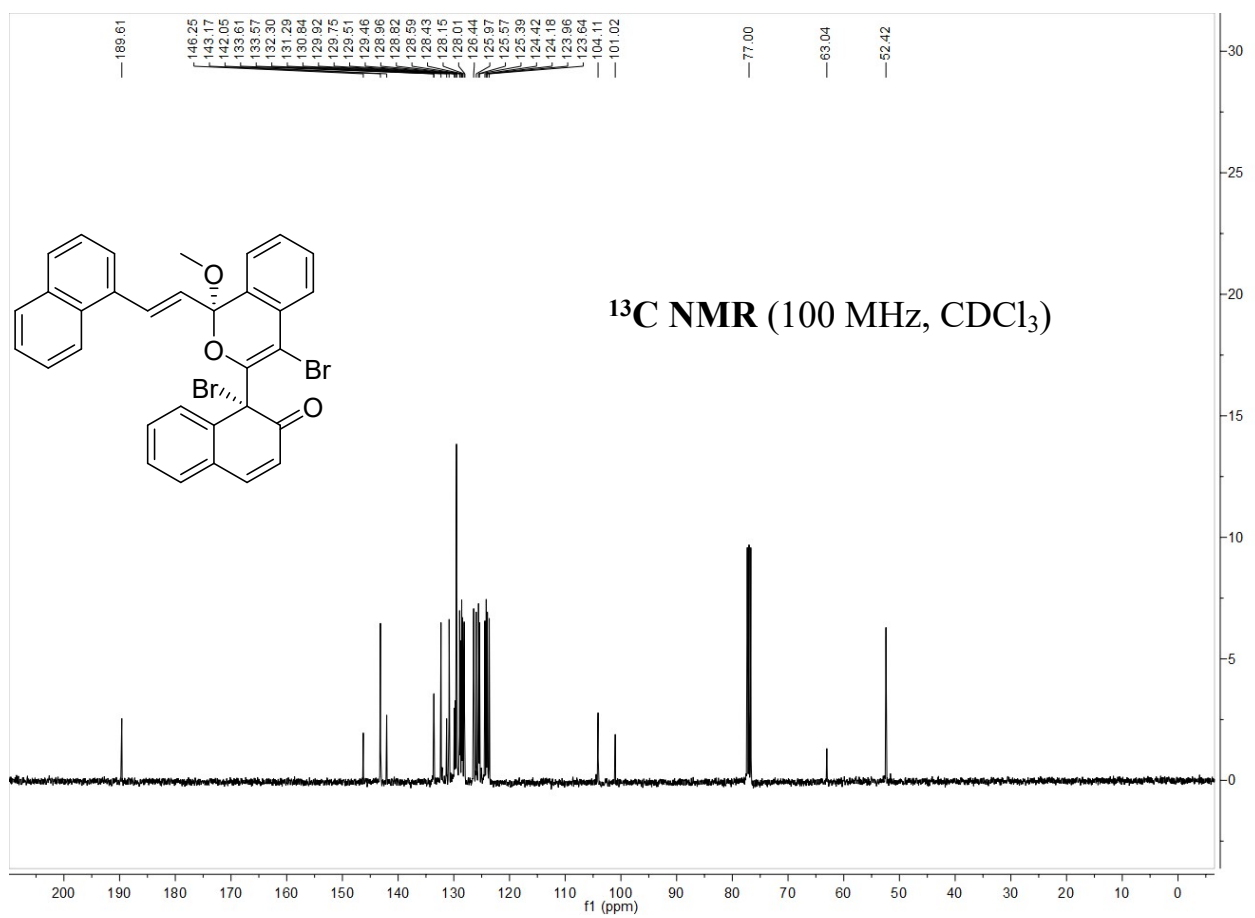

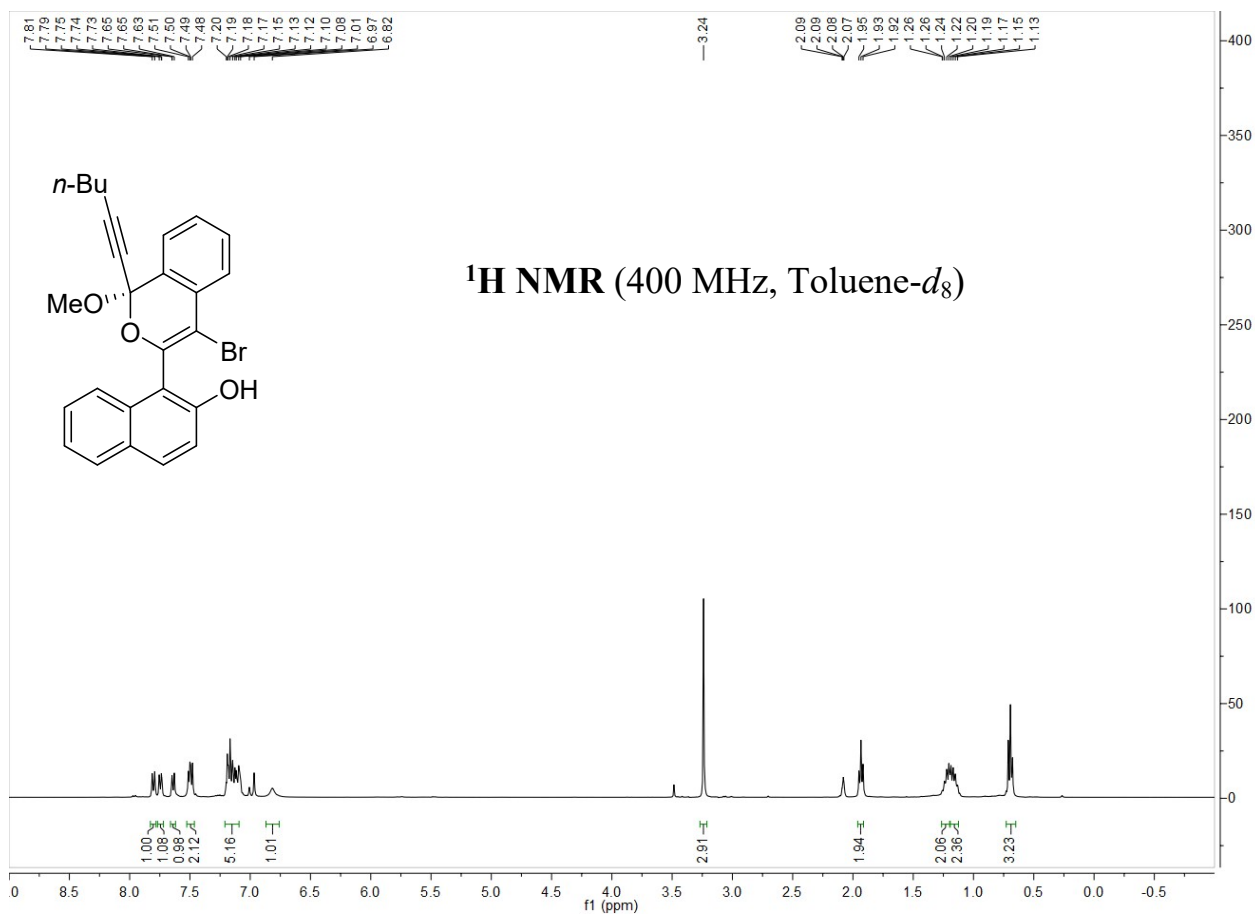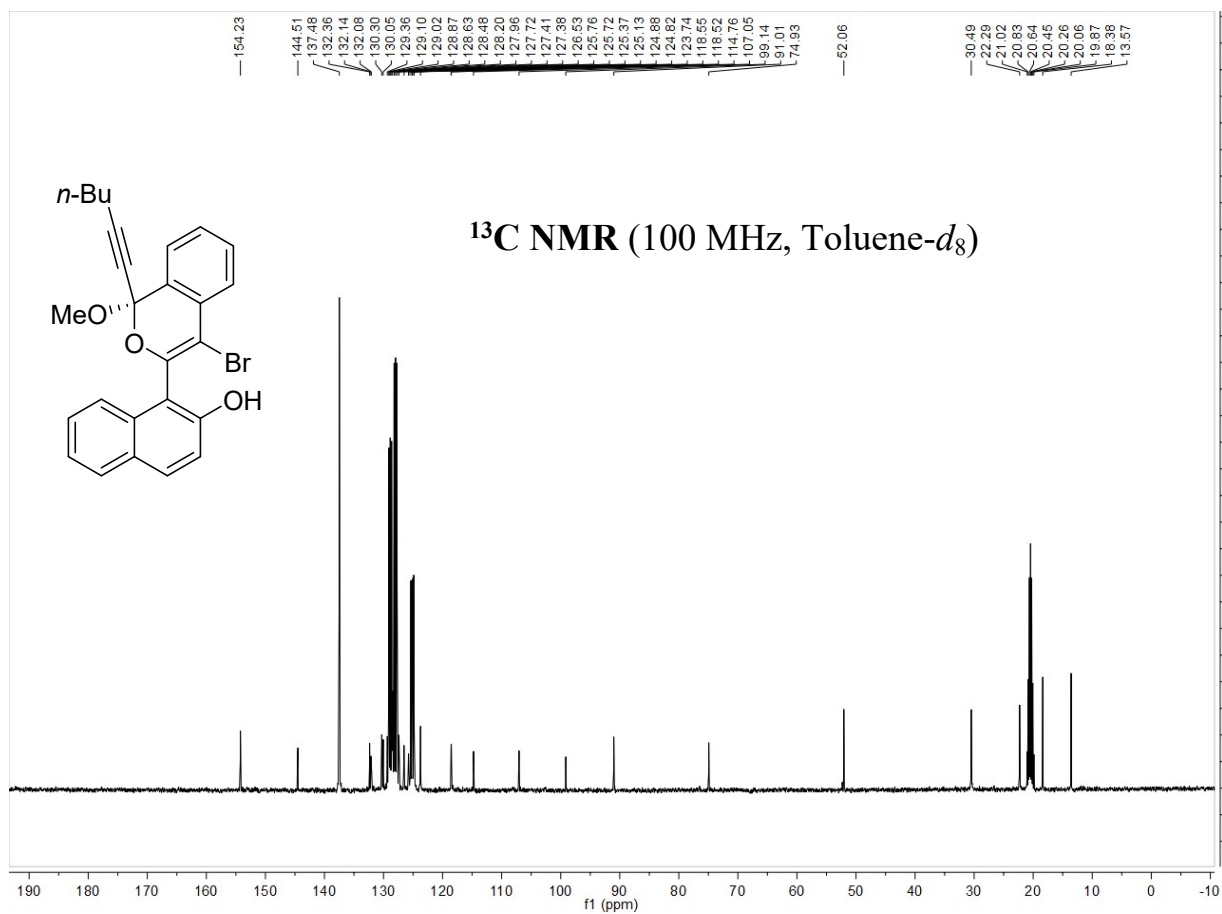

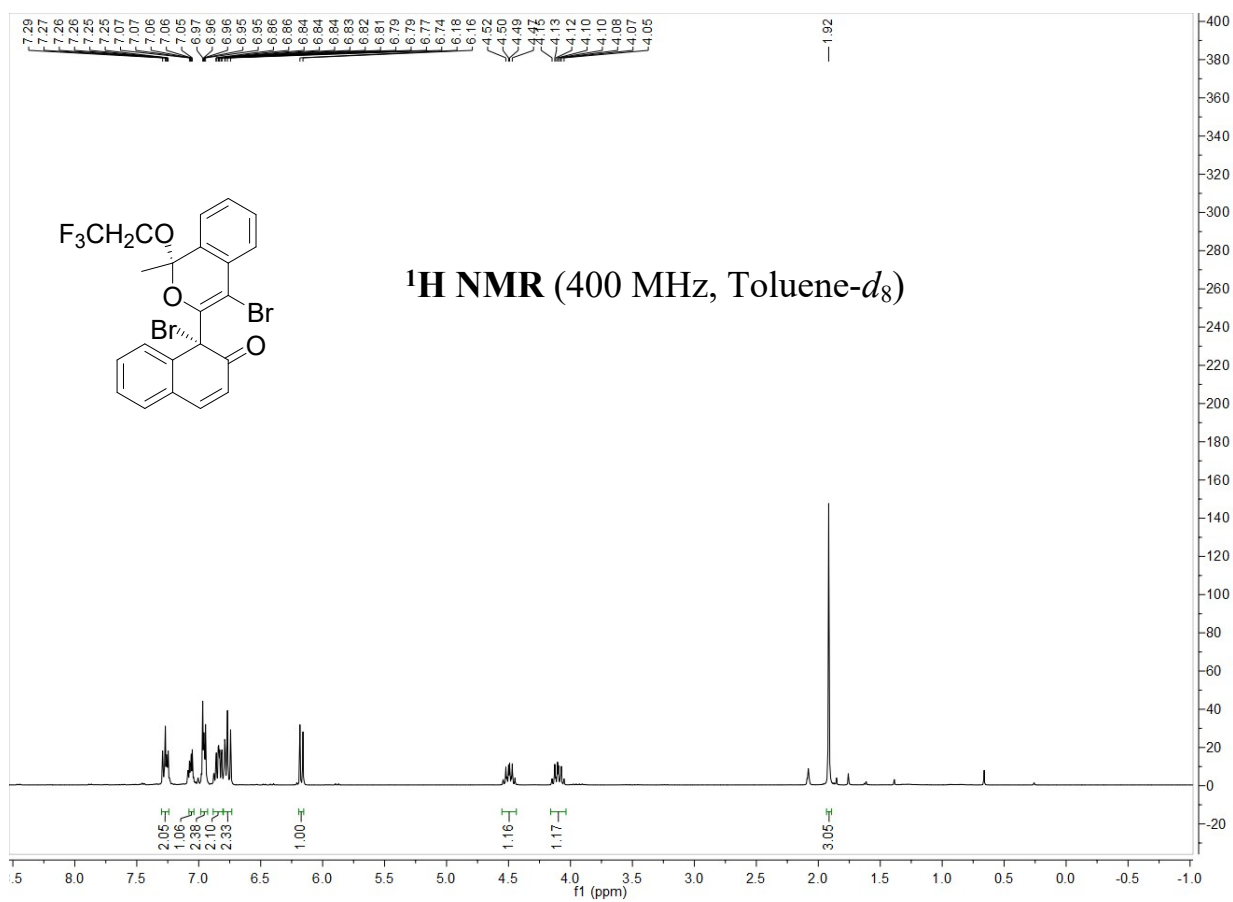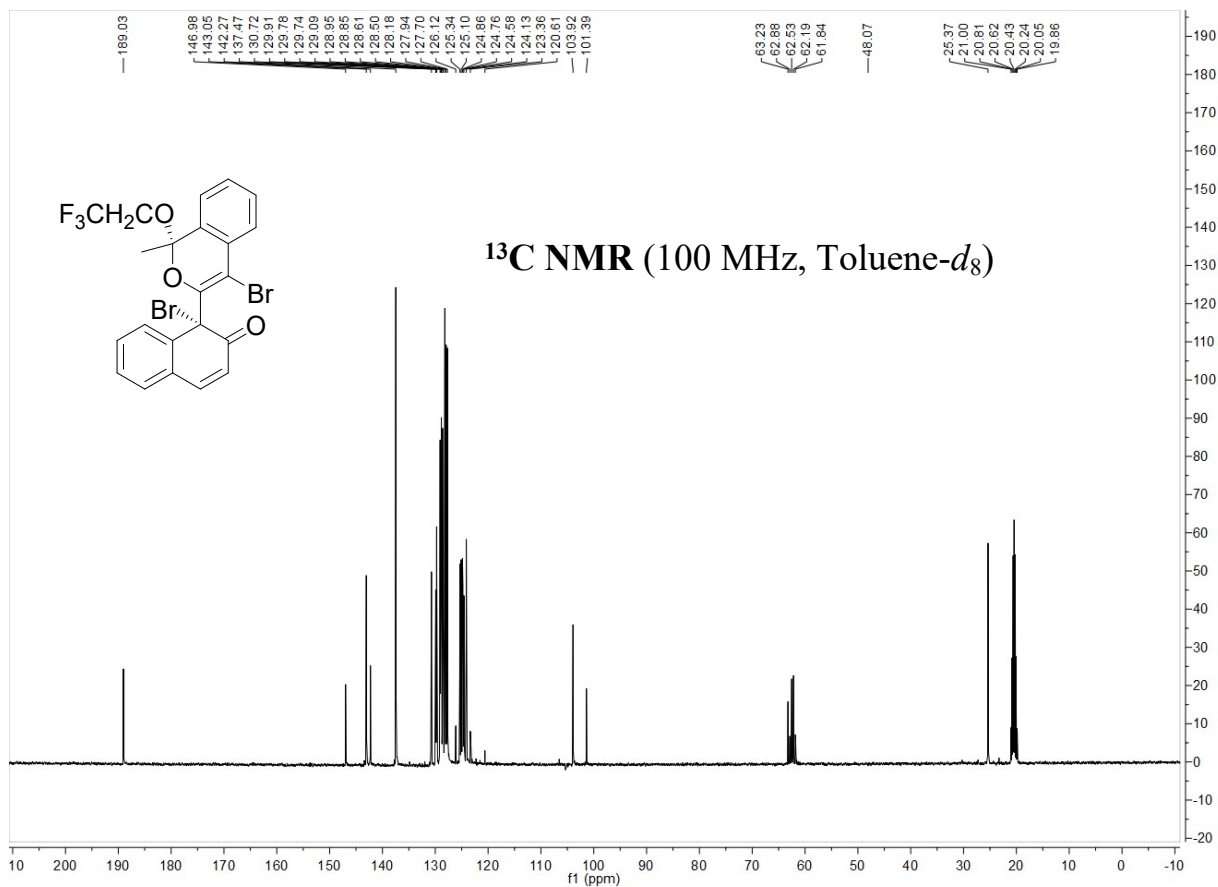

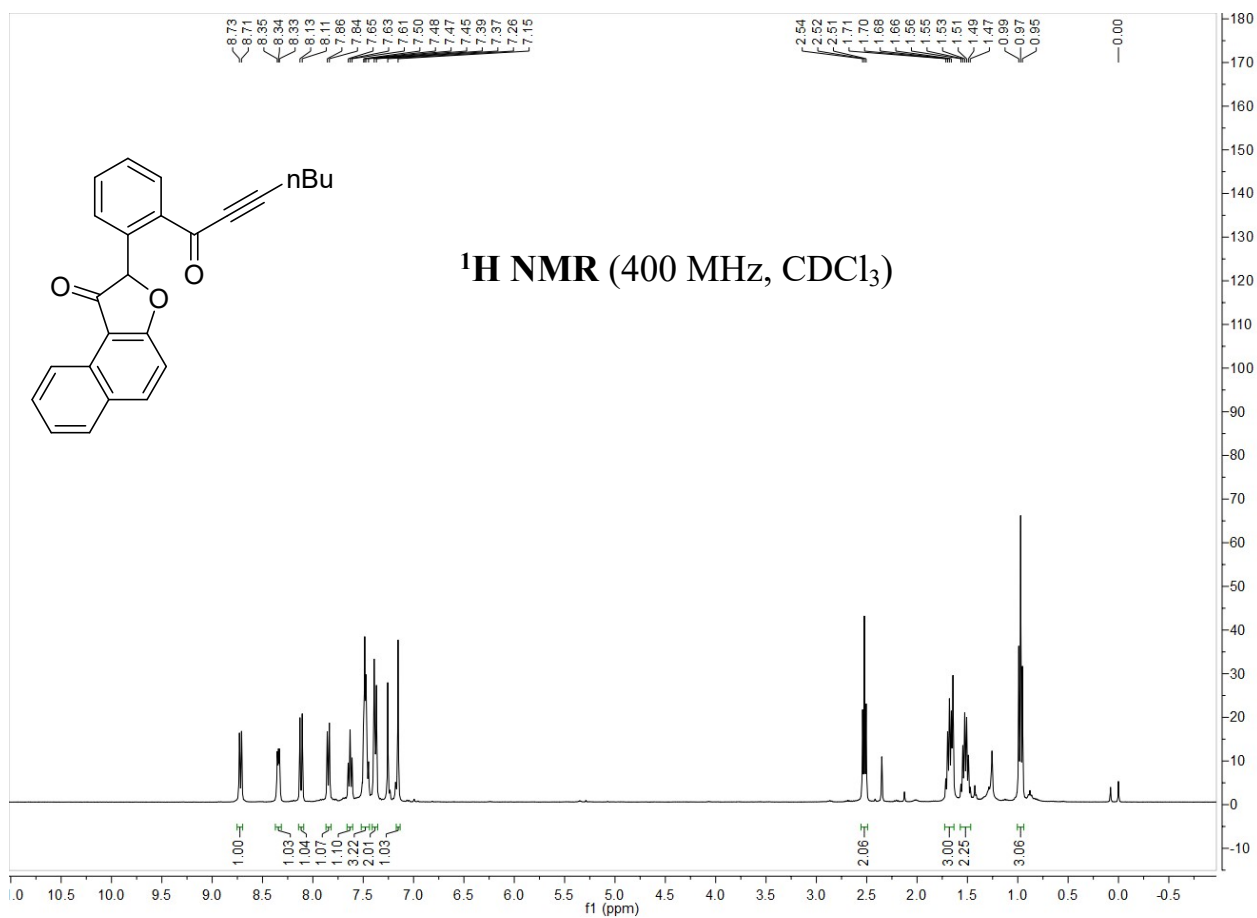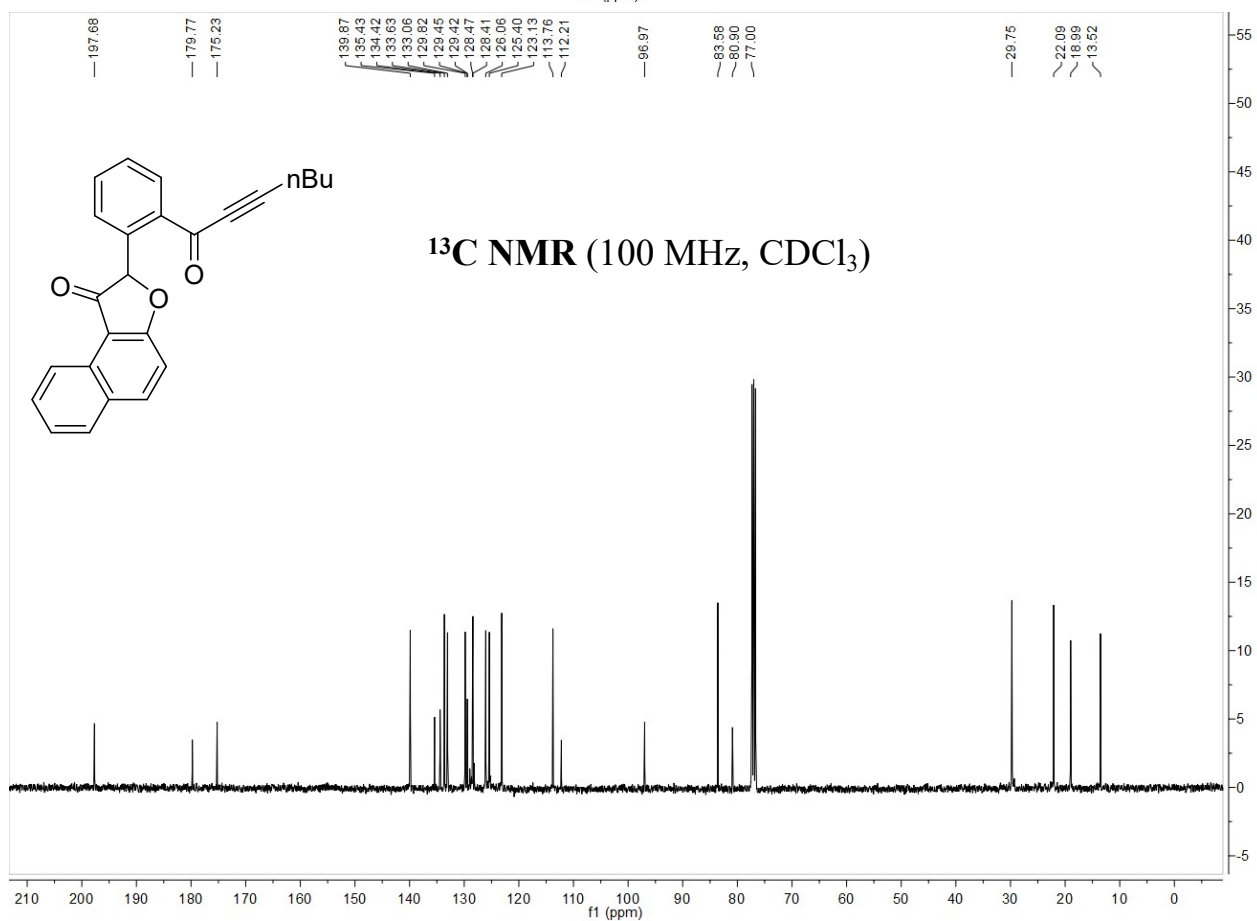

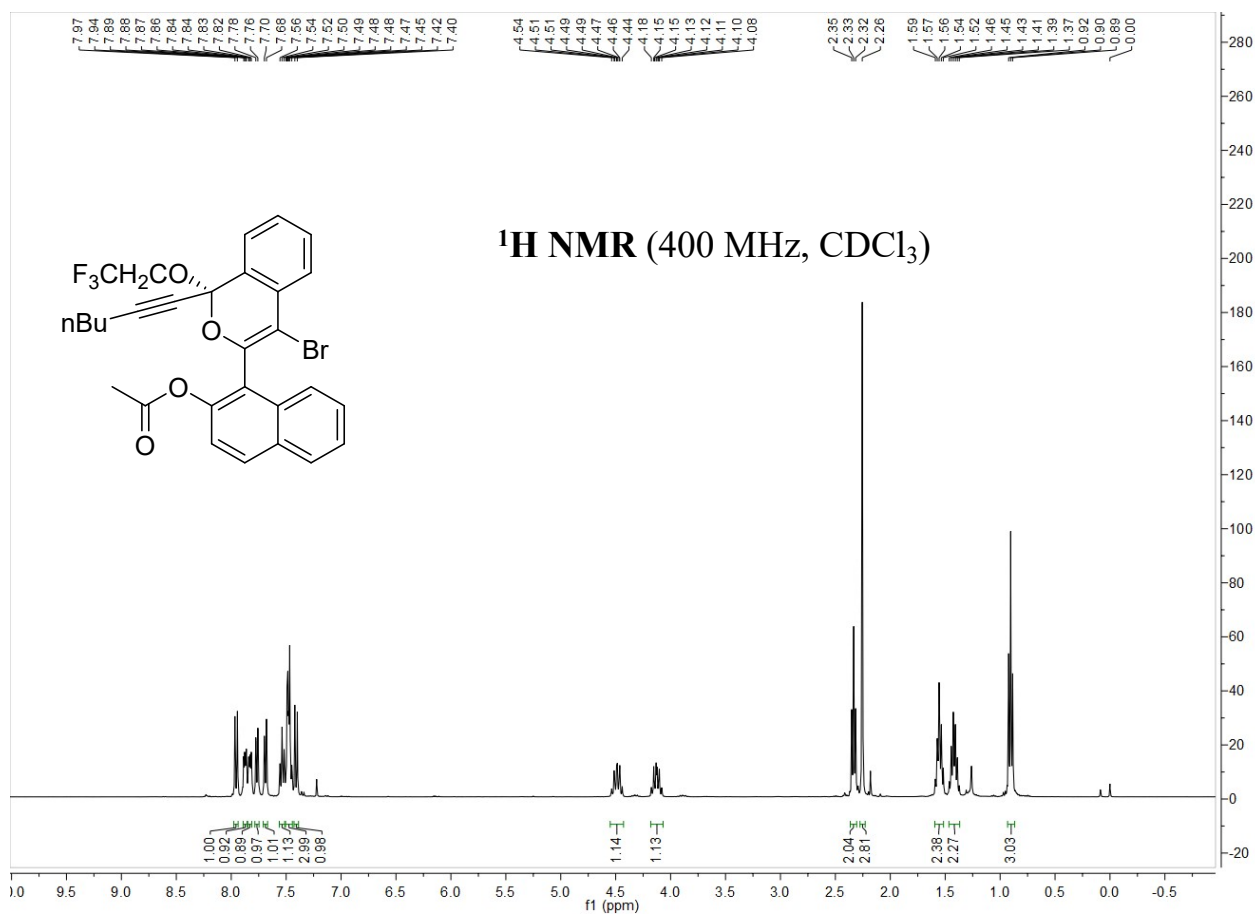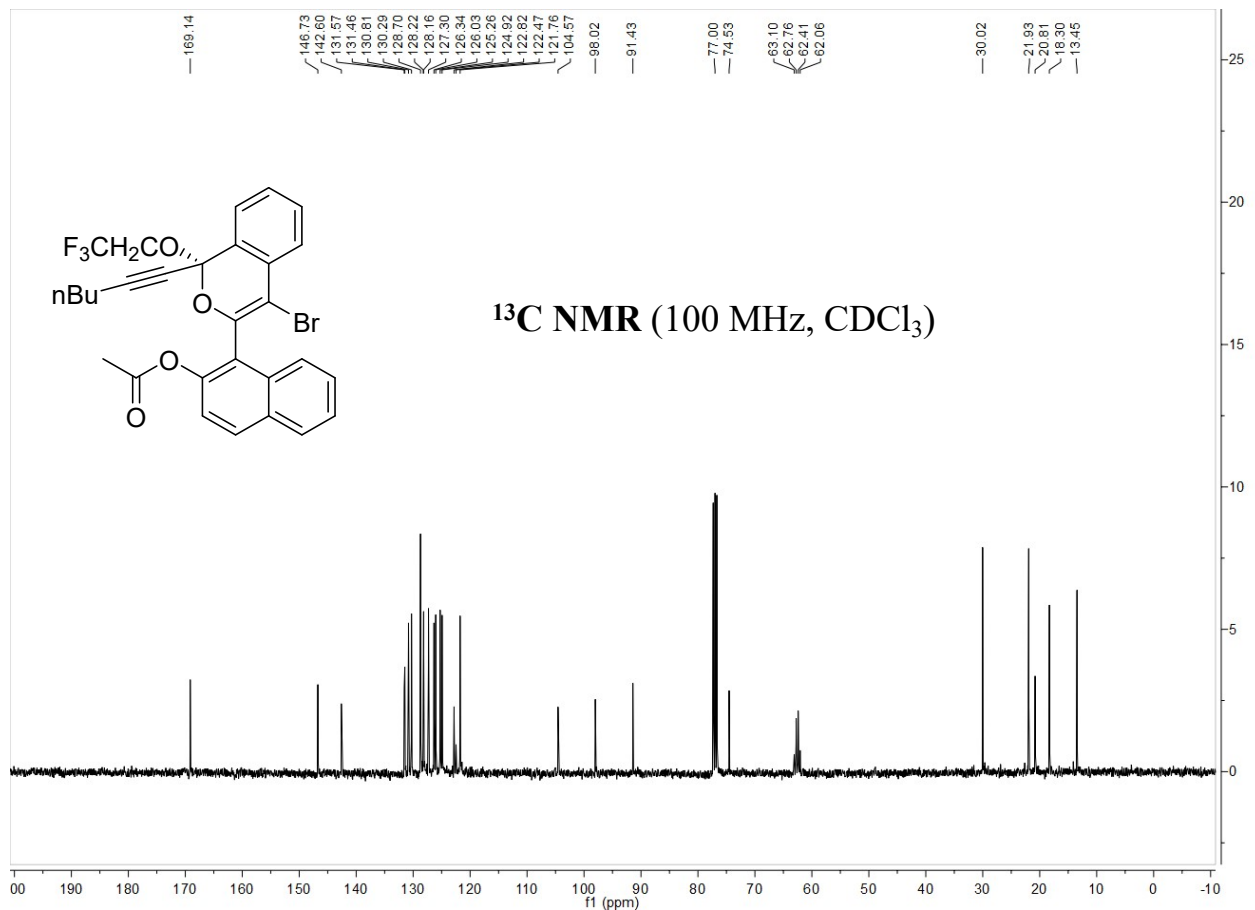

## XI. Crystallographic details of 4j.

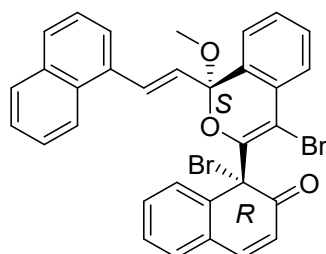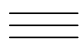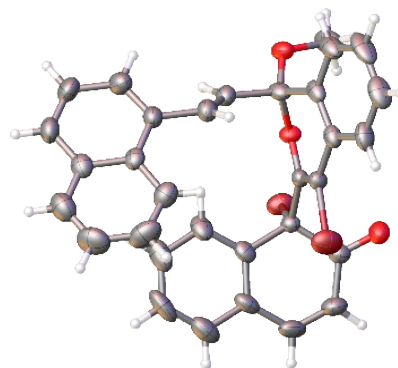

**4j**

**CCDC: 2077845**

|                                     |                                                                |              |                                                                |
|-------------------------------------|----------------------------------------------------------------|--------------|----------------------------------------------------------------|
| Bond precision:                     | C-C = 0.0079 Å                                                 |              | Wavelength=0.71073                                             |
| Cell:                               | a=7.8735(3)                                                    | b=13.6168(5) | c=24.1689(10)                                                  |
|                                     | alpha=90                                                       | beta=90      | gamma=90                                                       |
| Temperature:                        | 295 K                                                          |              |                                                                |
|                                     | Calculated                                                     |              | Reported                                                       |
| Volume                              | 2591.19(17)                                                    |              | 2591.18(19)                                                    |
| Space group                         | P 21 21 21                                                     |              | P 21 21 21                                                     |
| Hall group                          | P 2ac 2ab                                                      |              | P 2ac 2ab                                                      |
| Moiety formula                      | C <sub>32</sub> H <sub>22</sub> Br <sub>2</sub> O <sub>3</sub> |              | C <sub>32</sub> H <sub>22</sub> Br <sub>2</sub> O <sub>3</sub> |
| Sum formula                         | C <sub>32</sub> H <sub>22</sub> Br <sub>2</sub> O <sub>3</sub> |              | C <sub>32</sub> H <sub>22</sub> Br <sub>2</sub> O <sub>3</sub> |
| Mr                                  | 614.30                                                         |              | 614.31                                                         |
| D <sub>x</sub> , g cm <sup>-3</sup> | 1.575                                                          |              | 1.575                                                          |
| Z                                   | 4                                                              |              | 4                                                              |
| Mu (mm <sup>-1</sup> )              | 3.161                                                          |              |                                                                |
| F <sub>000</sub>                    | 1232.0                                                         |              |                                                                |
| F <sub>000</sub> '                  | 1230.22                                                        |              |                                                                |
| h,k,l <sub>max</sub>                | 10,18,33                                                       |              | 10,18,32                                                       |
| N <sub>ref</sub>                    | 6928[3907]                                                     |              | 5957                                                           |
| T <sub>min</sub> ,T <sub>max</sub>  | 0.457,0.483                                                    |              | 0.717,1.000                                                    |
| T <sub>min</sub> '                  | 0.423                                                          |              |                                                                |

Correction method= # Reported T Limits: T<sub>min</sub>=0.717 T<sub>max</sub>=1.000

AbsCorr = MULTI-SCAN

Data completeness= 1.52/0.86

Theta(max)= 29.042

R(reflections)= 0.0421(4360)

wR<sub>2</sub>(reflections)= 0.0779(5957)

S = 1.049

N<sub>par</sub>= 335
